# Supplementary material for: On the Feasibility of Imaging Carbonatite-Hosted Rare Earth Element Deposits Using Remote Sensing
Source: Oxford University Press journal article supplement (doi:10.2113/econgeo.111.3.641), 2016-04-08
Supplement: supplement_1478722_NeaveSupplementaryTables.xlsx [file supplement_1478722_NeaveSupplementaryTables.xlsx]

## Sheet: Whole-rock data
Sample number	Collection	Collection sample number	Brief description	Locality	Country	Reference/Source	SiO2 (wt.%)	TiO2	Al2O3	Fe2O3	FeO	MnO	MgO	CaO	Na2O	K2O	P2O5	SO3	H2O	CO2	LOI	Total		BaO (wt.%)*	Ce2O3	La2O3	Nb2O5	Nd2O3	SrO	Y2O3	ZrO	Total (with BaO)	Total (without Ba)		As (ppm)	Ba	Ce	Cl	Co	Cr	Cs	Cu	Dy	Er	Eu	F	Ga	Gd	Hf
CR-01	NHM	1996-P4(20)	Disseminated Monazite Stage	Bayan Obo	China	Smith et al. (2000)	1.07	0.24		10.12		1.81	15.78	25.54		0.05	1.45	0.52			40.32	96.88		0.327925	0.735102	0.634824	0.0467782	0.365658	0.139311	0.0116834	0.000945519	99.1422	98.8143		96	2937	11960		bdl	bdl	341	11					2
CR-02	NHM	1996-P4(11)	Banded Ore	Bayan Obo	China	Smith et al. (2000)	18.4		0.24	9.48			0.31	14.03	5.04	0.02	8.63	1.1			3.75	61.02		13.1864	6.69594	7.96854	0.619132	4.49882	0.189217	0.224144	0.00202611	94.4042	81.2178		48	118101	108942		bdl	bdl	3281	71					bdl
CR-03	NHM	1996-P4(18)	Fluorite Stage	Bayan Obo	China	Smith et al. (2000)	4.31	0.85		24.63		0.18	1.4	41.8	0.46	0.08	1.6	0.06			5.32	80.68		0.299007	0.276462	0.142023	0.0350479	0.334632	0.0917703	0.0119374	0.00108059	81.872	81.573		26	2678	4498		bdl	8	127	13					2
CR-04	NHM	1995-P3(6)	Barite Stage	Bayan Obo	China	Smith et al. (2000)	25.3	0.29	0.28	11.36		0.21	0.71	5.53	6.01	0.07	1.07	6.73			4.15	61.7		42.0045	0.352984	0.369894	0.452189	0.501191	0.345203	0.0166362	0	105.743	63.7381		907	376205	5743		bdl	bdl	bdl	78					8
CR-05	NHM	1991-P10(16)	Carbonatite	Uyaynah	UAE	Woolley et al. (1991)	9.73	1	2.16	15.1	1.17	0.26	2.74	34	0.43	0.39	9.53		1	20.2		98.9		0.0269084	0.0689004	0.0588734	0.0357632	0.0652003	0.0737947	0.0137153	0.155065	99.3982	99.3713			241	1121		24	18		21			24			63	18
CR-06	NHM	1991-P10(11)	Carbonatite	Uyaynah	UAE	Woolley et al. (1991)	5.29	0.42	0.66	14.1	2.18	0.64	1.77	39	0.07	0.05	12.2		0.2	21.7		100.5		0.0850797	0.38095	0.421496	0.244763	0.222427	0.27945	0.0383522	0.0524088	102.225	102.14			762	6198		2			18			78			204	4
CR-07	NHM	1991-P10(15)	Carbonatite	Uyaynah	UAE	Woolley et al. (1991)	5.73	1.11	2.48	11	3.98	0.39	3.27	37.4	0.04	0.11	10.9		1.4	21		99.5		0.00748076	0.0772594	0.0657927	0.0390534	0.0716153	0.122163	0.0158742	0.177893	100.077	100.07			67	1257		28	29		27			28			73	21
CR-08	NHM	1991-P10(1)	Carbonatite	Uyaynah	UAE	Woolley et al. (1991)	14.6	1.14	2.17	11.8	1.68	0.75	5.29	30.1	0.24	0.53	6.49		1.3	19.4		99.2		0.16815	0.678248	0.932357	0.108148	0.385486	0.429878	0.0351773	0.203557	102.141	101.973			1506	11035		15			24			86			221	18
CR-09	NHM	1991-P10(49)	Carbonatite	Uyaynah	UAE	Woolley et al. (1991)	18.9	1.33	2.56	10.1	2.84	0.62	4.77	29.8	0.62	0.15	4.86		1.4	20.3		100.9		0.148834	0.490785	0.641157	0.0587946	0.215779	0.33385	0.0237479	0.168572	102.982	102.833			1333	7985		16	95		13			63			168	16
CR-10	NHM	1998-P2(24)	Carbonatite	Fort Portal	Uganda	Eby et al. (2009)	18.45	2.4	4.9	3.85	6.98	0.35	8.95	28.31	0.45	0.63	2.34		4.27	15.9		97.78		0.272545	0.0372468	0.0256838	0.054503	0.0267099	0.51881	0.00482577	0.0617289	98.7821	98.5095			2441	606	200	33	142	1				9	3620	10	22	7
CR-11	SRK	10517	Microsyentite	Motzfeldt	Greenland	SRK Consulting (UK) Ltd.																		0.0115003	0.0770751	0.0974577	0.534301	0.0436224	0.00378434	0.0163822	0.390094					103	1254		1		1	4	21	8	3		79	25	73
CR-12	SRK	10518	Microsyentite	Motzfeldt	Greenland	SRK Consulting (UK) Ltd.																		0.0119469	0.0809472	0.0858472	1.90646	0.0468882	0.0442295	0.00977853	0.151688					107	1317		1		1	4	17	6	3		53	18	29
CR-13	SRK	10519	Microsyentite	Motzfeldt	Greenland	SRK Consulting (UK) Ltd.																		0.139343	0.41457	0.452105	6.00478	0.262201	0.0813633	0.227446	16.2444					1248	6745		1		1	3	283	217	23		39	240	2118
CR-14	CSM	OKA-1	Biotite-rich calcite carbonatite	Oka	Canada		3.48	0.81	1.72	6.19		0.36	4.23	43.57	0.24	0.24	2.03	0.03			35.36	98.26		0.127955	0.0488019	0.0470283	0.0288966	0.0368574	0.543526	0.00863558	0.224223	99.3259	99.198		17	1146	794		7	bdl	23	7					2
CR-15	CSM	StH-1	Biotite-rich carbonatite	St Honore	Canada		9.91	0.76	2.96	7.93		0.79	8.66	23.11	0.58	1.36	10.47	0.29			16.81	83.63		0.00770407	0.106823	0.0686074	3.05403	0.102408	0.402559	0.020827	0.0243133	87.4173	87.4096		6	69	1738		0	bdl	58	51					18
CR-16	CSM	KKDE18.10.12	Monazite carbonatite	Kangankunde	Malawi		0.25	0	0	4.94		2.04	6.09	10.93	0.12	0	5.75	0.64			23.15	53.92		11.0236	7.79374	8.06072		5.05063	8.79694		2.05191	96.6976	85.6739		447	98731	126803		12	bdl	3604	419					41
CR-17	CSM	Fen202/76	Calcite carbonatite	Fen	Norway		1.06	0.01	0.48	2.41		0.46	3.67	47.42	0.02	0.19	3.17	0.61			38.36	97.87		0.0811719	0.0391522	0.0361215	0.178816	0.0319586	0.657411	0.00952454		98.9042	98.823		15	727	637		5	bdl	23	9					bdl
CR-18	CSM	Jaq91/70	Apatite carbonatite	Jacupiranga	Brazil
CR-19	CSM	Intrusive	Calcite carbonatite	Kaiserstuhl	Germany		1.65	0.12	0.88	3.7		0.29	1.16	48.62	0.02	0.08	1.47	0.01			39.2	97.17		0.34512	0.0414263	0.0480838	0.419287	0.0167958	1.46702	0.0020319		99.5098	99.1646		23	3091	674		6	bdl	9	24					1
CR-20	CSM	To281	Banded carbonatite	Tundulu	Malawi	Previously analysed for CSM	4.8	0.14	0.41	9.32		2.1	0.48	25.3		0.6	4.74					47.89			0.0978497	0.0724776	0.0931272	0.103107	0.259109	0.105024	0.0534893	48.6742	48.6742				1592						151	71	52		8	148	5
CR-21	CSM	To282	Banded carbonatite	Tundulu	Malawi	Previously analysed for CSM	6.9	0.52	0.35	9.41		1.7	0.11	22.4		0.34	6.35					48.08			0.671303	0.666723	0.0619418	0.513437	0.358566	0.175379	0.020126	50.5475	50.5475				10922						266	122	159		9	374	2
CR-22	CSM	T0167	REE-rich ankerite carbonatite	Songwe	Malawi	Previously analysed for CSM	2.99	0.02	2.04	34.87		6.64	0.43	24.13	0.34	0.47	9.59	0.075			14.3	95.895		0.495405	0.111931	0.0970355	0.00668056	0.103504	0.527265	0.181195	0.00945519	97.4275	96.9321			4437	1821.1			22			202.9	133.1	63.1		9.4	174.94	0.6
CR-23	CSM	T0208	Carbonatite	Songwe	Malawi	Previously analysed for CSM	5.6	0.42	1.98	8.02		0.9	0.37	24.2		2.23	1.57	0.15				45.44			0.18691	0.175213	0.0957022	0.13285	1.94622	0.105913	0.0194507	48.1023	48.1023				3041						167	81	57		13	156	2
CR-24	CSM	T0210	Calcite carbonatite	Songwe	Malawi	Previously analysed for CSM	0.7	0.21	0.34	7.62		1.3	0.47	29.2		0.36	0.21	0.2				40.61			0.30283	0.255782	0.108005	0.246688	1.54531	0.0746724	0.00432237	43.1476	43.1476				4927						150	55	101		22	247	1
CR-25	CSM	MW16C	Ankerite carbonatite	Mount Weld	Australia
CR-26	CSM	PTC-1	Carbonatite (Transgressive)	Phalaborwa - Palabora	South Africa
CR-29	Harker	61759	Carbonatite	Tororo	Uganda		0.71	0.07	0.19	2.89		0.33	1.84	50.62	0.01	0.13	0.73	0.12			41.5	99.15		0.0483458	0.0195453	0.0180608	0.00429158	0.017379	0.495394	0.00749264		99.7605	99.7122		7	433	318		2	bdl	11	4					2
CR-31	Harker	62506	Carbonatite	Sukulu	Uganda		0.19	0.01	0.05	13.43		0.28	1.43	45.09	0.04	0.03	3.22				35.33	99.09		0.0617442	0.0228029	0.0197026	0.318578	0.0191285	0.495394	0.00584172	0.003647	100.037	99.9751		8	553	371		1	bdl	13	8					1
CR-33	Harker	72628	Apatite carbonatite	Chilwa Island	Malawi		0.71	0.12	0.01	7.97		1.34	11.68	34.33	0.06		4.59				38.42	99.24		0.0858613	0.0866633	0.06462	0.0113012	0.0878279	0.81659	0.0509246	0.00688878	100.451	100.365		15	769	1410		bdl	bdl	46	10					1
CR-35	Harker	72632	Monazite carbonatite	Kangankunde	Malawi
CR-36	Harker	115531	Carbonatite	Mountain Pass	USA		8.82			0.72		0.2	0.36	12.05			0.13	8.24			16.8	47.31		78.5332	5.61603	8.0314	0.00143053	3.59803	4.67212	0.0101595		147.772	69.2392		203	703367	91372		13	bdl	452	158					7
CR-37	Harker	116583	Phlogopite pyrochlore carbonatite	Panda Hill	Tanzania		5.36	0.12	1.16	3.44		0.72	3.9	42.83	0.11	1.21	1.93	0.66			35.49	96.93		0.109085	0.0593736	0.0535959	0.176527	0.043739	1.30453	0.00761963		98.6845	98.5754		24	977	966		6	bdl	33	23					3
CR-38	Harker	116602	Altered carbonatite with large pyrochlores	Panda Hill	Tanzania		28.45	2.24	0.29	14.76		1.11	0.66	25.53		0.02	2.81				21.41	97.29		0.257807	0.04788	0.0501948	0.829562	0.0373239	0.213815	0.0113025	0.0208014	98.7587	98.5009		106	2309	779		12	71	16	15					3
CR-42	Harker	117676	Phyrochlore sovite	Sokli	Finland		1.4	0.15	0.3	5.74		0.33	3.71	46.73		0.13	2.08	0.23			38.44	99.25		0.0647589	0.0286419	0.025332	0.00743874	0.0239107	0.56434	0.00596871		99.9704	99.9056		8	580	466		11	bdl	16	127					6
CR-43	Harker	117677	Coarse sovite	Sokli	Finland		1.91	0.13	0.16	12.49		0.3	3.83	42.47		0.01	2.76	0.45			34.73	99.25		0.0615209	0.0286419	0.0239246	0.283387	0.0239107	0.555589	0.00507976	0.0121567	100.244	100.183		7	551	466		7	bdl	16	13					4
CR-46	St Andrews	TANBREEZ	Kakortokite	Ilimaussaq	Greenland		51.42	0.16	8.79	8.24		0.41	0.17	4.67	12.28	2.47	0				1.52	90.12		0.032826	0.506397	0.453747	0.740869	0.375689	0.0481321	0.430128	10.3044	103.012	102.979		63	294	8239		43	bdl	239	86					23
CR-47	St Andrews		Carbonatite	Tikiusaaq	Greenland
CR-48	St Andrews		Carbonatite	Qeqertaasaq	Greenland
CR-49	St Andrews		Carbonatite	Qeqertaasaq	Greenland
* Ba is poorly determined and measured values are substantial overestimates at >2000 ppm
† Trace element analyses with concentrations >2000 ppm are poorly calibrated and should be considered as semi-quantitative
‡ Totals in italics do not include LOI
[truncated: 28 more columns]

## Sheet: VNIR-SWIR reflectance
Wavelength (nm)	CR-01 (n=94)	CR-02 (n=99)	CR-03 (n=37)	CR-04 (n=83)	CR-05 (n=43)	CR-06 (n=34)	CR-07 (n=9)	CR-08 (n=53)	CR-09 (n=19)	CR-10 (n=20)	CR-11 (n=21)	CR-12 (n=37)	CR-13 (n=38)	CR-14 (n=71)	CR-15 (n=75)	CR-16 (n=96)	CR-17 (n=43)	CR-18 (n=17)	CR-19 (n=41)	CR-20 (n=18)	CR-21 (n=77)	CR-22 (n=41)	CR-23 (n=38)	CR-24 (n=48)	CR-25 (n=20)	CR-26 (n=15)	CR-29 (n=39)	CR-31 (n=44)	CR-33 (n=15)	CR-35 (n=54)	CR-36 (n=68)	CR-37 (n=52)	CR-38 (n=39)	CR-42 (n=34)	CR-43 (n=39)	CR-46 (n=73)	CR-47 (n=49)	CR-48 (n=63)	CR-49 (n=57)
350	13.9567	8.18156	7.38314	11.5481	8.24847	10.0755	7.50594	13.4134	7.78311	11.0754	7.24325	10.2318	8.78766	20.3798	13.075	8.8672	20.6249	20.1652	15.6579	7.58895	6.18583	6.13624	8.46659	9.35214	9.37	33.8158	17.0497	10.8881	7.48277	7.07489	13.6586	23.0906	9.03472	12.1811	10.1279	15.8759	9.62659	26.7473	22.9663
351	13.6878	8.46649	7.43793	11.2568	8.52062	10.4335	7.64719	13.0378	8.05594	10.958	7.00243	10.4142	8.98399	20.2306	13.2961	8.63689	20.064	20.0902	15.7105	7.96051	6.19266	6.2843	8.29954	9.20206	9.03597	33.6659	16.6111	11.1069	7.74203	7.1502	13.4634	22.9452	9.30411	12.2628	10.4644	15.846	9.40486	26.7504	22.4726
352	13.4163	8.68774	7.54198	10.8993	8.95746	10.8914	7.47102	12.7656	8.41456	10.9895	7.36948	10.4059	9.41437	20.2217	13.8745	8.00026	19.6443	20.0046	15.4893	8.52794	6.10414	6.39788	7.49505	8.98414	8.33508	33.647	16.3765	11.7375	7.01386	7.41618	13.1127	22.8934	8.99513	11.9947	10.3705	16.0595	9.66168	26.392	22.552
353	13.6568	8.32869	7.98447	11.1662	8.82125	10.5524	7.08806	12.7351	7.97354	11.2626	7.12292	10.122	9.00836	20.1513	13.8678	7.97087	19.9984	19.9846	15.1619	8.8995	6.11355	5.92465	7.32648	9.21173	8.88224	33.4123	17.3981	11.3506	6.58742	7.39394	13.359	23.2659	8.56004	11.8058	9.76322	16.2113	9.98771	26.2441	22.8227
354	13.7944	8.35114	8.05676	11.2922	8.88483	10.53	8.19705	12.5049	8.3027	11.5861	7.1519	10.4578	8.91384	20.637	13.7156	8.35259	20.0713	19.8558	15.4781	8.7097	6.21092	5.9719	7.69086	9.3631	8.44614	33.2824	17.3755	10.8403	6.54457	7.05975	13.4244	23.0696	7.8935	11.7139	9.4512	15.8872	9.8462	26.9787	22.5011
355	13.8387	8.47613	7.94164	11.3323	8.92092	10.556	8.90628	12.6162	8.55682	11.6973	7.33975	10.5175	9.01842	20.899	13.7507	8.64626	20.0233	19.8505	15.7329	8.51017	6.25797	6.21376	7.89542	9.16269	8.11615	33.141	17.2548	10.6808	6.50363	7.00773	13.2841	23.1275	7.69968	12.0204	9.53971	15.9567	9.87584	26.939	22.5622
356	13.838	8.43108	7.84059	11.3773	8.78404	10.4033	8.23678	13.1889	8.26954	11.4762	7.46896	9.96661	9.10825	20.5977	14.0304	8.60822	20.0375	20.0958	15.5077	8.5791	6.17859	6.3162	7.6402	8.65377	8.57142	32.9412	17.6514	10.9178	6.30174	7.40281	13.0662	23.7985	8.17862	12.5813	9.88128	16.0097	9.9951	26.6649	22.6586
357	13.742	8.23422	7.70024	11.4011	8.81029	10.3191	7.96323	13.0297	8.49079	11.0167	7.15069	10.4102	8.96733	20.7765	13.9666	8.61886	20.0295	20.4392	15.3281	8.19738	6.06557	6.20079	7.7113	8.64174	8.58417	32.9399	17.5465	10.6497	6.4772	7.11429	13.1287	23.9213	8.13395	12.0019	9.9241	15.8705	10.0777	26.6749	22.573
358	13.8318	8.20822	7.93269	11.2285	8.70382	10.3308	7.9192	12.8873	8.6142	10.9502	7.30572	10.5869	9.21997	20.9977	13.8507	8.40985	20.1174	20.6167	15.2905	8.11375	5.96391	6.08581	7.74619	8.77093	8.79449	33.0881	17.3009	10.5684	6.91881	6.97295	13.0704	23.8127	8.05488	11.5028	10.0743	16.2398	10.0819	27.0186	22.675
359	14.059	8.39	8.39145	10.9678	8.46293	10.3622	7.91238	12.9951	8.45263	11.3442	7.94029	10.2273	9.79582	21.1121	13.7885	8.07155	20.3078	20.6062	15.397	8.42077	5.90439	6.10977	7.68276	8.87216	9.16847	33.3071	17.2264	10.8277	7.35329	7.12817	12.8977	23.672	8.15565	11.5496	10.3739	16.3276	9.83154	27.0295	22.9058
360	13.8962	8.47464	8.13194	11.1579	8.47453	10.1669	7.68591	12.9336	8.27938	11.5802	7.79246	10.3135	9.73617	21.3758	13.6402	8.27221	20.4762	20.6454	15.5617	8.37815	5.92377	6.4353	7.94151	9.02517	8.66425	33.4526	17.7128	10.942	7.23936	6.78901	13.2025	23.5284	8.32964	11.6943	10.4039	16.2059	9.67038	26.905	23.066
361	13.9665	8.59592	7.98984	11.4091	8.69685	10.0916	7.68334	13.0154	8.37631	11.7567	7.67317	10.1978	9.38497	21.3486	13.6444	8.2316	20.6314	20.8705	15.6858	8.07071	5.8796	6.38762	7.98065	8.76578	8.65913	33.5873	17.7178	10.8406	6.89519	6.82214	13.3358	23.5934	8.41404	11.9469	10.2341	16.3772	10.1773	27.2762	22.8976
362	14.1686	8.70357	8.05645	11.5332	8.90101	10.0627	7.74615	13.1883	8.52142	11.759	7.62715	10.0307	9.02214	21.0998	13.7225	8.0918	20.7301	21.1658	15.764	7.93064	5.87071	6.11062	7.87071	8.47676	9.10253	33.7548	17.4377	10.5895	6.69964	7.15635	13.3074	23.8045	8.29452	12.1035	10.0821	16.2915	10.4078	27.3531	22.8866
363	14.0449	8.6705	8.0807	11.414	8.72737	9.79946	7.41392	13.2201	8.21173	11.3946	7.36849	10.3426	8.97262	20.9677	13.6345	8.44663	20.6985	21.2662	15.8449	8.62531	6.1203	6.20111	7.97104	9.01071	9.23329	33.9939	17.7076	10.3662	7.1116	7.26072	13.4415	23.9443	7.885	11.8591	10.2799	16.2158	10.4172	27.2243	23.0761
364	14.0493	8.50972	8.01845	11.6387	8.82946	9.88611	7.7516	13.1128	8.06589	11.5612	7.24737	10.624	9.19381	21.1927	13.8147	8.50775	20.7004	21.1327	15.5254	8.80366	6.11808	6.49603	7.98055	9.18584	9.0789	34.0487	17.8889	10.5828	7.33969	7.14731	13.2594	24.0839	7.98583	11.8677	10.2261	16.3896	10.3408	27.1388	23.3388
365	14.0957	8.44925	7.97354	11.8874	9.01152	10.0582	8.20143	13.0131	8.29787	11.7478	7.29237	10.6727	9.45793	21.4671	14.0956	8.46112	20.8485	21.2496	15.3563	8.56945	5.9999	6.65328	7.87494	9.16099	8.99759	34.1196	17.9553	10.8181	7.27342	6.99108	13.0926	24.1098	8.24257	12.1241	10.1983	16.5793	9.91774	27.4062	23.2349
366	14.0117	8.66812	8.05066	11.7382	8.951	9.94847	8.03223	13.0897	8.85291	11.3219	7.40643	10.4436	9.50026	21.4569	14.2	8.62545	21.1706	21.9815	15.883	8.36742	6.01955	6.39975	7.71605	9.31679	9.33344	34.4329	18.016	10.6078	7.02496	6.98514	13.3425	23.9482	8.13214	12.4305	10.5473	16.7301	9.90408	27.5438	23.1622
367	13.9937	8.5886	8.0441	11.6871	8.88931	10.0482	8.17912	13.3556	8.68311	11.4527	7.19371	10.4625	9.11746	21.7804	14.1797	8.47456	21.1955	21.9192	15.8058	8.28196	6.03324	6.33202	7.7318	9.20897	9.66274	34.5384	18.0953	10.8008	6.98521	6.99819	13.4216	24.0982	8.18421	12.5264	10.4648	16.7805	10.2102	27.504	23.2541
368	14.0491	8.50966	7.91832	11.7078	8.89112	10.1383	8.35587	13.4824	8.36951	11.7025	7.15319	10.4103	8.99509	22.1319	14.141	8.41184	21.2904	21.6845	15.5963	8.48232	6.10408	6.38107	7.644	9.03797	9.4608	34.7214	18.2464	11.03	6.89141	7.04617	13.4808	24.2851	8.24167	12.5461	10.2475	16.6708	10.011	27.6138	23.4093
369	14.1409	8.62488	7.7656	11.7252	8.96109	10.1045	8.29721	13.307	8.41969	11.6702	7.56021	10.1332	9.41159	22.2576	14.1819	8.63953	21.679	21.8438	15.6647	8.90158	6.23906	6.3935	7.36869	8.98723	8.76037	35.0866	18.4271	11.0108	6.63894	7.13698	13.6145	24.2865	8.17628	12.5784	10.2065	16.7319	9.99881	27.8288	23.4982
370	14.1533	8.53819	8.02843	11.6843	9.02179	10.3929	8.09583	13.1829	8.7058	11.497	7.90588	10.2515	9.20105	22.2669	14.4034	8.50958	21.971	22.2413	15.7182	8.84355	6.22955	6.12656	7.57574	9.05325	9.33236	34.9268	18.2427	11.0804	6.83686	7.23454	13.4934	24.2322	8.11455	12.4229	10.4174	16.7908	10.1711	27.9454	23.51
371	14.2034	8.45448	8.22058	11.6595	8.93651	10.5135	8.0841	13.1436	8.73912	11.4084	7.77822	10.4723	9.09735	22.3719	14.4239	8.36588	22.0335	22.406	15.7147	8.49517	6.09394	6.03152	7.76616	9.09769	9.63137	35.1527	18.2277	10.928	6.97939	7.20831	13.39	24.2408	8.2681	12.3807	10.4426	16.6667	10.3311	27.8515	23.5145
372	14.2968	8.48233	8.1728	11.6977	8.79087	10.3286	8.26577	13.1781	8.49466	11.4687	7.21671	10.5712	9.24601	22.5946	14.2309	8.37125	21.9277	22.3491	15.6763	8.19407	5.95801	6.20652	7.74756	9.07516	9.26949	35.837	18.4899	10.6001	6.85886	7.06817	13.368	24.321	8.54561	12.5375	10.2692	16.7185	10.1331	28.0537	23.7937
373	14.2702	8.64222	8.1129	11.8133	9.04985	10.133	8.14811	13.2235	8.5812	11.5325	6.83103	10.2925	8.89207	22.7123	14.3428	8.48682	21.9761	22.8167	15.7201	8.64219	6.1743	6.26888	7.68887	9.06086	9.45463	35.84	18.5451	10.6887	6.60317	7.02266	13.1643	24.3209	8.3986	12.7105	10.5266	16.8786	10.1565	28.2543	24.0219
374	14.3569	8.66382	8.08731	12.0203	9.09436	10.0891	8.21334	13.2249	8.79462	11.6708	7.00494	10.3224	8.9766	22.772	14.4284	8.42165	22.2047	22.9998	15.7794	8.82291	6.14923	6.30607	7.81621	8.93014	9.35236	36.0348	18.6247	10.8349	6.51935	6.96488	13.2152	24.3364	8.23825	12.7953	10.5496	17.0241	10.4746	28.3171	24.0629
375	14.4766	8.58378	8.10966	12.1856	8.91308	10.1755	8.30627	13.212	8.95514	11.8326	7.49044	10.5719	9.33302	22.8841	14.4036	8.24557	22.5469	22.9497	15.8425	8.71243	5.97983	6.33301	8.0169	8.83412	9.17489	36.428	18.7429	10.9191	6.73207	6.93509	13.4411	24.3966	8.18374	12.7957	10.471	16.9649	10.4506	28.3403	24.0273
376	14.3874	8.61247	8.15835	12.0951	8.81056	10.244	7.952	13.2687	8.85973	11.9156	7.63816	10.5323	9.22367	23.2019	14.294	8.23816	22.8598	23.1438	15.9165	8.78598	6.12551	6.34815	7.97693	9.07409	9.64312	36.6136	18.823	10.9144	7.23611	7.05079	13.4806	24.5026	8.2297	12.788	10.826	17.1103	10.5181	28.5648	24.1965
377	14.3826	8.77549	8.03538	12.1387	8.95071	10.0757	8.09565	13.3356	8.77285	11.9484	7.59393	10.5858	9.02917	23.3601	14.4629	8.47398	22.9582	23.312	15.8064	8.5345	6.09153	6.39842	7.89661	9.18406	9.59634	36.6875	18.7871	10.8831	7.14062	7.23526	13.292	24.7127	8.41251	12.7248	10.8768	17.2951	10.618	28.7833	24.3994
378	14.4313	8.87199	7.89464	12.215	9.10724	10.0129	8.36701	13.4415	8.6377	12.0057	7.5103	10.6153	8.83869	23.4616	14.5988	8.69497	23.0215	23.5195	15.7172	8.2874	6.02177	6.41489	7.84792	9.09585	9.28376	36.8646	18.7734	10.8445	6.84519	7.27086	13.2281	24.9164	8.53743	12.7518	10.7411	17.2153	10.5746	28.719	24.3642
379	14.4389	8.73041	7.93343	12.1577	9.02483	10.3801	8.24467	13.5937	8.39832	12.1363	7.51252	10.4412	8.71368	23.6866	14.3703	8.63044	23.2771	23.8549	15.8775	8.46098	6.15645	6.33285	7.85777	8.89424	9.24868	37.2916	18.9201	10.8142	6.95861	7.01317	13.585	24.9876	8.43213	12.9819	10.7196	17.123	10.5924	28.8493	24.4033
380	14.465	8.80523	7.98425	12.2595	9.00997	10.3596	8.57823	13.4748	8.57796	12.1213	7.3687	10.2414	8.92684	23.9066	14.5555	8.50475	23.57	24.0616	15.9254	8.55292	6.26284	6.2875	7.82951	8.93043	9.45462	37.3786	18.9636	10.8917	7.06249	6.99428	13.4721	24.9733	8.44913	13.0111	10.791	17.2018	10.7184	29.0918	24.6202
381	14.509	8.8896	7.97356	12.3394	9.05571	10.1056	8.75664	13.4431	8.84488	12.1062	7.31428	10.2309	9.36361	24.0295	14.8078	8.4752	23.7835	24.1929	15.9909	8.72737	6.31543	6.40194	7.84758	9.09772	9.50499	37.5402	18.9592	10.9914	7.06938	7.15265	13.3515	24.9796	8.46631	13.0511	10.9224	17.4257	10.9003	29.3231	24.9474
382	14.5749	8.83463	7.90083	12.2896	9.12607	9.89555	8.43267	13.6875	8.88252	12.1802	7.44328	10.4703	9.77298	24.0524	14.8224	8.58327	23.901	24.336	16.1265	9.02395	6.3058	6.6497	7.93771	9.23077	9.30741	38.0032	18.995	11.0609	6.99932	7.3183	13.5364	25.0518	8.41751	13.2115	11.0685	17.378	10.9157	29.4661	25.056
383	14.7348	8.78723	7.92283	12.3123	9.22471	10.1047	8.28443	13.7991	8.54504	12.1862	7.32944	10.65	9.57064	24.1828	14.6366	8.60713	24.1515	24.5868	16.0088	8.946	6.16793	6.60667	7.93955	9.10322	9.76076	38.2048	19.1844	11.2059	7.07026	7.19004	13.5893	25.0481	8.56472	13.1272	11.1739	17.4173	10.9498	29.3738	25.0144
384	14.6886	8.92228	7.98952	12.3797	9.17235	10.3203	8.161	13.8196	8.47312	12.1755	7.29569	10.7478	9.46499	24.3887	14.5699	8.54743	24.3887	24.8487	15.9803	8.84311	6.16971	6.59462	7.82225	9.11888	9.90744	38.5214	19.2868	11.1591	7.17763	7.06895	13.5801	25.1575	8.51742	13.1682	11.2364	17.5528	11.0054	29.338	25.0269
385	14.4844	9.19066	8.05218	12.4711	9.00821	10.351	8.1176	13.7863	8.76789	12.1997	7.44153	10.7153	9.56668	24.615	14.6997	8.46523	24.5262	25.0255	16.1277	8.8253	6.34146	6.68239	7.70033	9.29194	9.58535	39.0076	19.2763	10.9608	7.20183	7.06013	13.5689	25.3395	8.29468	13.3956	11.2548	17.637	11.0036	29.7972	25.3321
386	14.6466	9.25267	8.05467	12.5825	9.06643	10.2177	8.54755	13.725	8.8829	12.3462	7.6352	10.3961	9.19358	24.7664	14.8244	8.52012	24.5016	24.9545	16.2335	8.68863	6.43231	6.63021	7.9266	9.1143	9.608	39.3364	19.3952	11.0525	6.94044	7.0289	13.6157	25.2115	8.47084	13.4986	11.2143	17.7285	10.9909	29.9071	25.4797
387	14.7332	9.26571	8.03588	12.6029	9.13565	10.1787	8.73477	13.7244	8.80252	12.3656	7.56917	10.4504	9.04596	24.8779	14.8768	8.50837	24.6472	25.1728	16.3733	8.77534	6.3693	6.53388	8.0598	9.08839	9.48093	39.5032	19.5155	11.2509	6.86283	7.10585	13.6511	25.3226	8.56026	13.5022	11.2451	17.8081	11.0717	29.8891	25.5269
388	14.7235	9.28074	8.02491	12.6141	9.19102	10.2209	8.65465	13.7946	8.69062	12.2976	7.38365	10.7167	9.15852	24.979	14.8592	8.4882	24.94	25.542	16.4574	9.01954	6.3076	6.48786	8.02964	9.16043	9.33668	39.6823	19.6341	11.3862	6.97608	7.22166	13.6794	25.5636	8.4812	13.4851	11.3021	17.8706	11.2404	29.9989	25.583
389	14.7706	9.31983	8.05008	12.7908	9.27479	10.1984	8.60406	13.9004	8.8252	12.3162	7.44536	10.641	9.26146	25.1051	14.8258	8.62974	25.1844	25.6046	16.3335	9.153	6.5189	6.59379	7.93602	9.03408	9.56896	40.14	19.7944	11.2837	7.06037	7.21675	13.7303	25.526	8.32417	13.5677	11.2556	17.9793	11.1512	30.1255	25.6779
390	14.7626	9.41787	8.16421	12.9186	9.15529	10.1629	8.5223	13.833	8.86786	12.1793	7.41783	10.729	9.33418	25.3131	14.9195	8.59511	25.328	25.6795	16.2725	8.98408	6.48719	6.74971	7.97611	9.10059	9.80263	40.283	19.8783	11.3767	7.10895	7.2566	13.5137	25.5427	8.35391	13.6077	11.2413	18.0077	11.1477	30.2692	25.7003
391	14.7341	9.51792	8.24206	12.9839	9.06637	10.2065	8.45658	13.8489	8.89535	12.1921	7.36105	10.7717	9.31641	25.5001	15.0119	8.48536	25.48	25.788	16.2762	8.83986	6.38468	6.81545	8.07227	9.24724	9.72952	40.4303	19.8956	11.4789	7.12587	7.27487	13.3852	25.6392	8.47868	13.7215	11.3175	17.9919	11.2928	30.3844	25.7251
392	14.7434	9.57011	8.16698	13.0242	9.22974	10.3747	8.45673	14.1654	9.02012	12.5908	7.39406	10.5406	9.20409	25.5794	14.9618	8.48372	25.7383	25.9095	16.2878	9.02315	6.46457	6.69877	8.08868	9.28388	9.2553	40.9469	19.8934	11.3536	7.12127	7.19648	13.6776	25.7635	8.55584	13.9889	11.4822	18.0969	11.4259	30.3917	25.9728
393	14.7812	9.69375	8.08418	13.0861	9.17526	10.4065	8.49663	14.17	9.01661	12.5748	7.46376	10.569	9.31923	25.7521	14.9135	8.65282	25.8922	26.1334	16.2921	8.9523	6.52538	6.60198	7.94827	9.24306	9.38	41.2393	19.9342	11.2916	7.06908	7.1907	13.7642	25.8315	8.70246	13.9507	11.5178	18.1303	11.4439	30.534	26.1123
394	14.7591	9.78239	8.04573	13.1421	9.10208	10.3453	8.60477	14.0864	8.96783	12.4369	7.55435	10.7232	9.33044	25.9269	14.9131	8.79659	25.9693	26.462	16.3695	8.88411	6.54076	6.55513	7.84309	9.17811	9.62926	41.5685	20.0102	11.2402	7.02974	7.20371	13.7636	25.8064	8.75596	13.9055	11.4458	18.1649	11.4089	30.6832	26.1466
395	14.6809	9.78019	8.05535	13.1686	9.13826	10.2607	8.73932	14.0927	8.96997	12.416	7.62915	10.8518	9.12755	26.055	14.9607	8.79298	26.0534	26.7947	16.5087	8.9573	6.51072	6.54559	7.88176	9.15402	9.61434	42.0376	20.1043	11.1877	7.04695	7.19898	13.8042	25.7276	8.67695	14.0455	11.3716	18.2844	11.4202	30.7104	26.1746
396	14.7926	9.77131	8.02301	13.1381	9.10894	10.2145	8.65292	14.0894	9.14037	12.4055	7.57078	10.9101	9.25035	26.2412	14.9707	8.69269	26.3372	26.7362	16.447	8.85733	6.44115	6.49235	7.95854	9.29933	9.35577	42.1663	20.2098	11.3156	7.12791	7.23292	13.9082	25.8201	8.77289	14.1777	11.5888	18.3539	11.5403	30.8781	26.3575
397	14.859	9.82424	8.07348	13.2461	9.10555	10.2159	8.63654	14.1598	9.13889	12.4138	7.55302	10.8416	9.4666	26.4244	15.0136	8.71778	26.5863	26.7806	16.3951	8.79159	6.48276	6.52164	7.92585	9.32737	9.33739	42.3667	20.221	11.433	7.19825	7.23247	13.8911	25.8598	8.82977	14.3085	11.7315	18.4216	11.6543	31.0561	26.4686
398	14.8151	9.92959	8.17104	13.4576	9.1526	10.2449	8.71271	14.2696	8.96742	12.4805	7.58601	10.6874	9.56725	26.5626	15.0973	8.85194	26.7292	27.0628	16.4164	8.81893	6.59708	6.62985	7.81286	9.21542	9.58108	42.7038	20.1944	11.4932	7.20736	7.19917	13.7544	25.8313	8.77216	14.4451	11.7216	18.4976	11.7251	31.1606	26.4861
399	14.7463	9.98995	8.0879	13.4853	9.21724	10.2443	8.60919	14.2467	8.9976	12.7251	7.49501	10.5916	9.28099	26.61	15.1697	8.8178	26.8324	27.3742	16.4261	8.85039	6.5238	6.68408	7.849	9.21804	9.61706	42.8687	20.3917	11.5981	7.10423	7.21912	13.687	25.9463	8.63341	14.6092	11.7668	18.5343	11.8259	31.1687	26.6736
400	14.8069	10.0701	8.06035	13.4057	9.20814	10.2418	8.56172	14.2708	9.07351	12.6172	7.48286	10.6612	9.17458	26.729	15.1986	8.75452	27.0352	27.5359	16.4827	8.91331	6.52573	6.63932	7.90692	9.26226	9.60036	43.1999	20.4654	11.6643	7.0766	7.19452	13.7786	26.0311	8.65073	14.6394	11.8274	18.5538	11.872	31.33	26.8187
401	14.9114	10.1537	8.08661	13.3431	9.16585	10.2394	8.60632	14.3	9.10559	12.3866	7.51266	10.8122	9.27502	26.8816	15.1744	8.725	27.2776	27.6404	16.5399	8.99827	6.57012	6.56397	7.94906	9.30388	9.56937	43.5967	20.4345	11.6784	7.12736	7.17167	13.921	26.0954	8.79996	14.5784	11.8857	18.6039	11.8864	31.5426	26.8812
402	14.877	10.1956	8.07508	13.4461	9.18838	10.2333	8.69298	14.2172	9.02303	12.564	7.46038	10.8731	9.37879	26.9544	15.1072	8.76733	27.4141	27.892	16.5166	9.08322	6.51563	6.58086	7.96422	9.30055	9.53997	43.7944	20.4643	11.6564	7.17895	7.2477	13.9197	26.2114	8.9327	14.5619	11.9233	18.719	11.923	31.6205	26.8979
403	14.9256	10.2054	8.11006	13.5301	9.24822	10.2642	8.61355	14.2973	8.94798	12.6343	7.50709	10.8855	9.43224	27.1256	15.1218	8.80488	27.5277	28.0831	16.5373	9.17671	6.50705	6.68356	7.89894	9.24175	9.62045	43.9917	20.5601	11.6388	7.22543	7.29913	13.8993	26.2454	8.85472	14.6882	11.9247	18.7728	11.972	31.7436	27.0476
404	14.9822	10.2082	8.12681	13.6019	9.28743	10.2775	8.58419	14.3959	8.97407	12.6557	7.57571	10.9042	9.44463	27.3309	15.1772	8.79592	27.7206	28.2515	16.5485	9.25252	6.54892	6.73418	7.86183	9.24427	9.71319	44.2135	20.6635	11.6559	7.18154	7.30463	13.9018	26.2398	8.78253	14.8799	11.9827	18.7713	12.0399	31.8701	27.1953
405	14.9579	10.2306	8.07795	13.6855	9.269	10.2351	8.77611	14.3592	9.11655	12.7413	7.567	10.9596	9.43608	27.4781	15.2101	8.74102	28.0315	28.4514	16.5028	9.2788	6.60622	6.64574	7.92851	9.3733	9.71051	44.4522	20.7249	11.7137	7.04342	7.28106	13.9428	26.2566	8.91182	15.0219	12.1537	18.7595	12.1207	31.9757	27.2574
406	14.9829	10.2937	8.13426	13.6884	9.2905	10.2736	8.7342	14.3823	9.0649	12.7057	7.49924	10.9319	9.35989	27.5702	15.2202	8.80381	28.2003	28.5672	16.5534	9.20477	6.58398	6.69425	7.86753	9.34144	9.64015	44.7007	20.806	11.7201	7.29512	7.30403	14.0069	26.2823	8.93744	14.9846	12.2434	18.8379	12.1812	32.1177	27.2855
407	15.0014	10.3496	8.17519	13.7105	9.27696	10.2791	8.72808	14.436	9.01039	12.6605	7.50134	10.8972	9.35362	27.6218	15.2445	8.84357	28.2989	28.7073	16.6029	9.14959	6.60397	6.72408	7.79954	9.28561	9.58377	44.9238	20.8505	11.7573	7.38106	7.33544	13.9722	26.3095	8.90771	15.0077	12.2984	18.9146	12.2152	32.2246	27.4227
408	14.9889	10.3724	8.14352	13.7851	9.21361	10.2056	8.85491	14.476	9.0559	12.6752	7.58327	10.9036	9.44734	27.6773	15.2936	8.80303	28.4058	28.9254	16.6023	9.1655	6.69868	6.66117	7.80419	9.28962	9.58613	45.1238	20.8644	11.857	7.10802	7.34376	13.8545	26.3477	8.89479	15.1704	12.3507	18.9575	12.2269	32.3138	27.601
409	15.014	10.3786	8.13738	13.7892	9.23932	10.1599	8.74594	14.4419	9.07436	12.7079	7.47854	10.9285	9.42855	27.8588	15.3225	8.8394	28.5688	29.1573	16.6299	9.15623	6.68734	6.64072	7.85234	9.27548	9.62779	45.3759	21.0216	11.937	7.11876	7.30616	13.9943	26.4596	8.99437	15.1839	12.3688	18.9706	12.2316	32.4472	27.6423
410	15.0388	10.3985	8.15992	13.7666	9.23085	10.1981	8.70802	14.4417	9.03749	12.7246	7.482	10.9471	9.43943	28.0235	15.3072	8.80714	28.7652	29.2995	16.6565	9.14331	6.69388	6.63206	7.85553	9.28396	9.6656	45.6121	21.0722	11.9585	7.21784	7.37225	14.0442	26.502	9.03019	15.1851	12.3408	19.0189	12.3157	32.525	27.6722
411	15.0566	10.4318	8.19002	13.7613	9.2001	10.2687	8.77434	14.4765	9.00677	12.7403	7.59119	10.9335	9.49905	28.1278	15.2839	8.73674	28.9607	29.3916	16.661	9.16966	6.7158	6.64001	7.82364	9.31176	9.67039	45.8131	21.0221	11.9417	7.28024	7.48301	13.9733	26.4821	8.9896	15.2332	12.3122	19.0707	12.3777	32.6045	27.7711
412	15.0879	10.4488	8.17972	13.8305	9.28445	10.2078	8.74333	14.4487	9.15067	12.8241	7.53842	10.8478	9.52633	28.2011	15.3547	8.82614	29.0999	29.6097	16.6186	9.31531	6.63328	6.70464	7.85987	9.31615	9.61337	45.9891	21.1073	11.9625	7.20361	7.37067	14.0245	26.5414	9.00341	15.3374	12.3912	19.104	12.3587	32.7408	27.9507
413	15.1155	10.4808	8.12898	13.8945	9.33403	10.1956	8.7333	14.4522	9.15998	12.8212	7.52239	10.8828	9.52055	28.3088	15.3909	8.85724	29.2573	29.8291	16.6299	9.39799	6.62041	6.71738	7.86099	9.33388	9.65335	46.2047	21.1388	12.0263	7.14245	7.38276	14.0454	26.6159	8.98377	15.4012	12.4624	19.1901	12.4315	32.9133	28.0364
414	15.1361	10.5207	8.10058	13.9243	9.32647	10.208	8.74396	14.4997	9.08604	12.7755	7.54169	10.9637	9.48651	28.4264	15.3869	8.84008	29.413	30.0127	16.6731	9.39698	6.66356	6.6824	7.84652	9.35219	9.71699	46.4244	21.1536	12.1031	7.15768	7.45942	14.0538	26.6673	8.97499	15.4552	12.5086	19.2514	12.5451	33.0084	28.1139
415	15.155	10.5484	8.167	13.9167	9.28992	10.1589	8.73994	14.5716	9.10143	12.7971	7.53512	10.9309	9.43954	28.5013	15.3817	8.86057	29.5225	30.1535	16.6846	9.35449	6.68546	6.65047	7.87162	9.34637	9.66326	46.5803	21.2514	12.1454	7.25793	7.41489	14.115	26.6702	9.05099	15.5667	12.5465	19.2811	12.6326	33.0355	28.2103
416	15.1867	10.5603	8.16324	13.9762	9.31779	10.1357	8.73735	14.6138	9.15135	12.838	7.57656	10.917	9.43889	28.6079	15.4059	8.90873	29.6892	30.2755	16.6928	9.30562	6.71711	6.70348	7.87444	9.37404	9.68352	46.7408	21.31	12.1137	7.19024	7.42769	14.1572	26.7182	9.05073	15.6147	12.5857	19.3451	12.6113	33.125	28.2935
417	15.2059	10.5564	8.1184	14.0499	9.34882	10.1353	8.75061	14.6229	9.16035	12.8814	7.58784	10.9378	9.49794	28.7243	15.4419	8.93494	29.8734	30.4527	16.7213	9.31144	6.73758	6.74877	7.83605	9.40338	9.75208	46.9043	21.3379	12.1177	7.1101	7.44209	14.1651	26.791	9.03468	15.6532	12.6365	19.3897	12.6253	33.2324	28.3515
418	15.1959	10.5421	8.09053	14.0797	9.32694	10.1446	8.78629	14.6156	9.09704	12.9147	7.51829	10.9826	9.59822	28.8236	15.4652	8.91372	30.0244	30.6944	16.7711	9.38557	6.73596	6.71664	7.76915	9.39828	9.80379	47.0668	21.3681	12.2268	7.15693	7.40583	14.1444	26.8508	9.06751	15.7323	12.7014	19.4415	12.7052	33.3363	28.4209
419	15.1949	10.5349	8.1203	14.0895	9.32489	10.1875	8.83316	14.6424	9.11565	12.9248	7.51545	11.0183	9.64566	28.9223	15.4572	8.94124	30.1394	30.7065	16.7522	9.34891	6.77245	6.74767	7.78011	9.35165	9.76128	47.2733	21.4388	12.2576	7.11091	7.43256	14.1383	26.8686	9.0717	15.7661	12.7571	19.5298	12.8265	33.4255	28.5337
420	15.2167	10.5361	8.1374	14.1091	9.32703	10.1799	8.82938	14.6863	9.17181	12.9182	7.54227	11.0548	9.65841	29.0244	15.4621	8.98996	30.2715	30.7933	16.7481	9.32528	6.79537	6.78511	7.80412	9.35402	9.70575	47.4741	21.5232	12.2882	7.12496	7.48212	14.1334	26.8977	9.1126	15.8058	12.7985	19.5632	12.8658	33.5209	28.6026
421	15.255	10.5396	8.11221	14.1425	9.32008	10.1109	8.77765	14.7237	9.21343	12.9095	7.56536	11.0845	9.65658	29.129	15.4917	9.02005	30.4289	31.0469	16.7892	9.35953	6.7862	6.78964	7.80551	9.41814	9.68874	47.6329	21.585	12.3585	7.23965	7.51769	14.1337	26.9592	9.19144	15.8779	12.8248	19.6165	12.8772	33.6505	28.6773
422	15.2783	10.523	8.08267	14.1469	9.29376	10.1014	8.80653	14.7133	9.17288	12.9327	7.5715	11.0522	9.65611	29.2289	15.4947	8.95729	30.5323	31.1345	16.8005	9.32398	6.78972	6.75615	7.80934	9.40988	9.70289	47.7273	21.55	12.4272	7.27237	7.50831	14.184	27.0219	9.17409	15.9577	12.8342	19.7048	12.9151	33.7942	28.7746
423	15.2843	10.5308	8.10466	14.158	9.31103	10.1367	8.79985	14.7478	9.17604	12.9333	7.55762	11.0533	9.63027	29.3244	15.4979	8.96567	30.6553	31.2883	16.8024	9.34772	6.80768	6.74998	7.82331	9.42092	9.75736	47.8557	21.5989	12.4775	7.28214	7.5337	14.2581	27.0268	9.18664	16.0479	12.882	19.7144	13.0282	33.8362	28.8361
424	15.279	10.5468	8.15185	14.1808	9.35488	10.1851	8.77271	14.81	9.22125	12.9092	7.55396	11.0917	9.60922	29.4188	15.5123	9.03264	30.8088	31.5013	16.8055	9.42583	6.82757	6.77053	7.83545	9.4492	9.81139	48.0235	21.7093	12.5151	7.29007	7.58943	14.3091	27.0137	9.23513	16.1253	12.9543	19.7378	13.0657	33.91	28.9088
425	15.271	10.508	8.13014	14.1996	9.34535	10.1945	8.83912	14.7974	9.21251	12.8949	7.62256	11.1037	9.67041	29.5192	15.5417	9.0115	30.9617	31.5987	16.8173	9.45669	6.82191	6.76723	7.81695	9.42497	9.7812	48.1667	21.7038	12.5647	7.30013	7.60797	14.2637	27.1058	9.23917	16.1428	12.9824	19.7877	13.0696	34.0202	29.0121
426	15.3005	10.4445	8.12236	14.1805	9.34805	10.1378	8.84287	14.7998	9.20317	12.9418	7.65498	11.1309	9.72786	29.5905	15.5402	9.03465	31.1031	31.6771	16.8373	9.45984	6.82292	6.76044	7.76713	9.44339	9.72607	48.3485	21.7435	12.6317	7.23781	7.63218	14.2745	27.1506	9.2818	16.2078	13.0401	19.8409	13.1657	34.1132	29.1454
427	15.3399	10.3922	8.12359	14.1623	9.36183	10.0707	8.82326	14.8335	9.20766	13	7.63667	11.1615	9.7467	29.6569	15.5254	9.08038	31.2285	31.7719	16.8677	9.46948	6.83928	6.76579	7.75474	9.47212	9.70102	48.5224	21.8148	12.7055	7.18855	7.65492	14.3225	27.1783	9.33329	16.3061	13.1061	19.8963	13.2589	34.1992	29.1907
428	15.3447	10.3802	8.10709	14.1955	9.36676	10.0709	8.86943	14.8891	9.22875	12.9994	7.59105	11.1701	9.71827	29.7552	15.5323	9.09014	31.3385	31.8961	16.9088	9.51949	6.87111	6.79611	7.84728	9.45324	9.74742	48.6241	21.86	12.7717	7.26189	7.66121	14.3415	27.2609	9.33954	16.3841	13.1387	19.942	13.3359	34.2941	29.2496
429	15.3599	10.3259	8.09493	14.1992	9.35703	10.1319	8.93528	14.927	9.25793	13.0371	7.59725	11.1525	9.72693	29.8467	15.5504	9.1205	31.4448	31.9841	16.9431	9.55996	6.91235	6.84577	7.86763	9.49143	9.77155	48.7602	21.9284	12.8411	7.26066	7.70456	14.3711	27.2943	9.36468	16.4087	13.1954	19.9746	13.3997	34.4024	29.3878
430	15.3848	10.2677	8.09725	14.1819	9.35423	10.1648	8.96189	14.9503	9.2817	13.074	7.6288	11.1557	9.76759	29.9163	15.5671	9.15358	31.5539	32.066	16.9827	9.55664	6.93017	6.85686	7.85655	9.53724	9.76615	48.8847	21.9743	12.899	7.26842	7.73883	14.3898	27.3159	9.3866	16.4374	13.2471	20.0185	13.4526	34.4937	29.4599
431	15.4107	10.2415	8.11083	14.1673	9.374	10.123	8.9344	14.9731	9.29388	13.0767	7.64899	11.2068	9.82078	29.97	15.5769	9.17095	31.6728	32.1695	17.0276	9.52021	6.91315	6.80503	7.86328	9.54388	9.74862	48.975	21.9708	12.9409	7.3466	7.73646	14.3899	27.3642	9.39005	16.5109	13.2777	20.0562	13.5307	34.5663	29.5259
432	15.4118	10.2212	8.09075	14.1881	9.40501	10.133	8.99408	15.0247	9.31611	13.0913	7.63715	11.253	9.87449	30.0786	15.6019	9.18637	31.8157	32.2689	17.0137	9.60917	6.92766	6.78946	7.85261	9.54028	9.77713	49.1703	21.9839	13.0079	7.35207	7.7786	14.4406	27.4205	9.42508	16.5718	13.3646	20.0914	13.6233	34.6431	29.6085
433	15.4199	10.1959	8.08061	14.1974	9.41806	10.1452	9.03646	15.0624	9.31289	13.122	7.64328	11.2652	9.89963	30.1488	15.6239	9.19244	31.9467	32.361	17.0175	9.69436	6.95406	6.81042	7.84588	9.54992	9.79039	49.3379	22.0446	13.0715	7.32142	7.82391	14.4798	27.4514	9.45807	16.6277	13.4148	20.1484	13.6728	34.7734	29.6948
434	15.4431	10.1658	8.09692	14.1879	9.41378	10.1376	9.02259	15.075	9.28782	13.1569	7.67734	11.2576	9.90058	30.1678	15.6278	9.19472	32.0609	32.4474	17.0665	9.71366	6.9785	6.84547	7.8519	9.58276	9.76648	49.4378	22.1351	13.1306	7.28695	7.85381	14.4875	27.4631	9.47772	16.6829	13.4125	20.1881	13.7409	34.847	29.7452
435	15.4422	10.1492	8.1175	14.2265	9.44552	10.1385	9.01805	15.1023	9.31382	13.1542	7.68778	11.3247	9.93579	30.263	15.595	9.22378	32.2127	32.5391	17.1141	9.70553	7.00096	6.83532	7.85829	9.64055	9.74406	49.5869	22.1555	13.2395	7.26834	7.88818	14.5105	27.5295	9.51457	16.7309	13.4701	20.2178	13.8237	34.9022	29.8003
436	15.4453	10.1096	8.1143	14.2167	9.4478	10.129	9.01482	15.1208	9.32824	13.1662	7.67109	11.347	9.97927	30.3112	15.5816	9.25004	32.3196	32.6016	17.1524	9.699	6.99779	6.82318	7.87921	9.6394	9.72737	49.6947	22.1912	13.3131	7.27064	7.92424	14.5483	27.5934	9.51152	16.8035	13.5381	20.2585	13.9035	35.0022	29.9048
437	15.465	10.0884	8.09441	14.188	9.43079	10.1167	9.02071	15.1391	9.32127	13.1915	7.64859	11.3303	10.0245	30.3341	15.5992	9.27017	32.3968	32.6673	17.1868	9.71838	6.99222	6.83563	7.89961	9.61432	9.71354	49.7729	22.2421	13.3695	7.30797	7.94814	14.5828	27.6426	9.5089	16.8882	13.6011	20.3284	13.9985	35.0944	29.9867
438	15.5033	10.1782	8.08918	14.2496	9.45065	10.1251	9.05068	15.1852	9.31221	13.1969	7.66204	11.3558	10.0731	30.4398	15.6334	9.2956	32.5202	32.8125	17.2338	9.78468	7.03921	6.89376	7.88545	9.67877	9.69292	49.8924	22.2597	13.4906	7.39887	7.9374	14.581	27.6886	9.61031	16.944	13.6585	20.4041	14.0577	35.1724	30.0476
439	15.5007	10.2506	8.0744	14.322	9.45435	10.1225	9.07108	15.2228	9.32697	13.2118	7.68504	11.3688	10.077	30.4791	15.6456	9.33005	32.6307	32.9082	17.2786	9.80871	7.06336	6.88413	7.88512	9.72963	9.68521	49.9763	22.3033	13.5747	7.39611	7.97144	14.604	27.7275	9.66997	16.9838	13.7011	20.4715	14.0806	35.2418	30.1019
440	15.4882	10.3353	8.07363	14.396	9.45341	10.1201	9.10012	15.2534	9.36326	13.2306	7.71329	11.3836	10.0694	30.5017	15.6461	9.35355	32.7294	32.9797	17.3154	9.82653	7.0707	6.85609	7.89161	9.75769	9.70738	50.0522	22.3605	13.6399	7.3548	8.01452	14.6427	27.7673	9.69175	17.0356	13.7373	20.5392	14.1727	35.325	30.1836
441	15.5073	10.4956	8.11053	14.4845	9.47012	10.1341	9.15679	15.2865	9.40267	13.2418	7.74401	11.4255	10.0981	30.5898	15.6567	9.34995	32.831	33.0859	17.3427	9.89179	7.08704	6.88819	7.88726	9.77667	9.76346	50.1638	22.4037	13.729	7.37136	8.01335	14.671	27.8164	9.7159	17.1215	13.7793	20.606	14.2558	35.4157	30.2362
442	15.5218	10.7102	8.11718	14.6332	9.47323	10.1317	9.15513	15.3066	9.37774	13.2594	7.74639	11.468	10.1341	30.6363	15.6654	9.38514	32.9267	33.1941	17.3742	9.90122	7.10834	6.90873	7.8956	9.77431	9.77621	50.2537	22.4453	13.8122	7.37988	8.03953	14.6922	27.8622	9.72268	17.1841	13.8228	20.6693	14.3096	35.4934	30.2691
443	15.5345	10.9236	8.10402	14.7732	9.47177	10.1096	9.13304	15.3271	9.35908	13.2833	7.74683	11.4965	10.1604	30.6886	15.6702	9.41708	33.0129	33.3131	17.3924	9.92739	7.13413	6.91222	7.90131	9.78437	9.77251	50.3118	22.4685	13.879	7.39113	8.08646	14.7054	27.9035	9.73801	17.2356	13.8809	20.7266	14.3451	35.5344	30.3247
444	15.5491	11.0988	8.08679	14.8614	9.47831	10.0816	9.12557	15.3586	9.39426	13.3088	7.76032	11.507	10.1773	30.7744	15.6726	9.41915	33.0946	33.4417	17.396	10.0076	7.16041	6.90517	7.89975	9.82064	9.77541	50.3586	22.4746	13.9333	7.41172	8.13317	14.7156	27.9398	9.77589	17.2905	13.9496	20.7844	14.4262	35.615	30.4102
445	15.5668	11.2592	8.06463	14.9618	9.50765	10.1082	9.11721	15.3978	9.42857	13.3251	7.74713	11.521	10.2355	30.8143	15.6848	9.44389	33.2018	33.5356	17.444	10.0233	7.17225	6.90372	7.93597	9.82507	9.75578	50.4946	22.5325	14.0168	7.41201	8.13871	14.7507	27.9654	9.80492	17.347	13.9634	20.8435	14.5031	35.7122	30.4824
446	15.5719	11.3852	8.06097	15.0352	9.52102	10.1175	9.1147	15.4181	9.42871	13.3175	7.74426	11.5169	10.2726	30.8449	15.6888	9.46855	33.2974	33.6296	17.4809	10.0131	7.17837	6.91459	7.94575	9.83586	9.75152	50.6073	22.57	14.0823	7.41161	8.1559	14.7701	27.9954	9.837	17.3773	14.0081	20.9033	14.5392	35.7913	30.5198
447	15.5698	11.4791	8.07342	15.0855	9.51219	10.0901	9.12535	15.4282	9.40592	13.3008	7.75748	11.5094	10.271	30.8869	15.6832	9.48762	33.374	33.734	17.4956	10.0201	7.18532	6.93103	7.91629	9.86392	9.76781	50.6741	22.5773	14.1235	7.41821	8.19928	14.7706	28.0367	9.87276	17.3972	14.0938	20.9625	14.6119	35.834	30.6043
448	15.5921	11.5717	8.06199	15.1816	9.51787	10.0721	9.16255	15.4931	9.4372	13.3364	7.74882	11.5748	10.2649	30.9425	15.6908	9.51867	33.4615	33.8232	17.538	10.1132	7.19792	6.92464	7.90012	9.88594	9.76837	50.7915	22.6316	14.1893	7.42456	8.23389	14.8006	28.0885	9.89957	17.4931	14.128	21.013	14.6858	35.9067	30.6951
449	15.6045	11.6612	8.06536	15.2368	9.52534	10.0752	9.1838	15.5241	9.45228	13.3669	7.75107	11.5883	10.3095	31.0079	15.6846	9.55495	33.5576	33.9483	17.5663	10.13	7.21337	6.92987	7.89875	9.89805	9.74322	50.9126	22.6648	14.2481	7.43076	8.27261	14.8319	28.1268	9.89407	17.5478	14.1643	21.0541	14.7435	36.0078	30.7638
450	15.6085	11.7469	8.07816	15.274	9.52537	10.0931	9.1908	15.533	9.45222	13.3819	7.77001	11.5683	10.3748	31.0668	15.6786	9.58506	33.6567	34.0986	17.5849	10.0973	7.23171	6.94486	7.91416	9.9076	9.71586	51.0307	22.6722	14.2981	7.44147	8.31677	14.8556	28.156	9.88945	17.5795	14.2056	21.0937	14.7879	36.0587	30.7935
451	15.6221	11.8264	8.07446	15.3672	9.50955	10.1065	9.20702	15.5785	9.4704	13.3911	7.79834	11.6038	10.3846	31.0969	15.7053	9.59543	33.7497	34.2313	17.6184	10.1365	7.25346	6.95023	7.94389	9.92865	9.72899	51.1538	22.6793	14.3508	7.46312	8.36235	14.8709	28.1942	9.94727	17.6698	14.2346	21.1494	14.8237	36.1177	30.8689
452	15.6289	11.8986	8.07205	15.4215	9.51728	10.0924	9.20561	15.5953	9.48509	13.3706	7.81436	11.6481	10.4009	31.1501	15.707	9.62843	33.8476	34.3572	17.6191	10.1471	7.26409	6.95274	7.95689	9.93804	9.73666	51.2685	22.7196	14.4006	7.46535	8.37466	14.8983	28.2208	9.97051	17.7032	14.2651	21.2093	14.8672	36.1969	30.9591
453	15.648	11.9679	8.06878	15.462	9.52681	10.074	9.18699	15.613	9.48794	13.3588	7.81372	11.6752	10.4108	31.2029	15.7083	9.6669	33.9385	34.4751	17.6155	10.1556	7.27015	6.94486	7.94126	9.94239	9.74658	51.3639	22.765	14.453	7.46308	8.38519	14.9314	28.2393	9.98334	17.7263	14.3069	21.2545	14.9305	36.2881	31.0059
454	15.6894	12.0352	8.06123	15.5267	9.51264	10.0778	9.16378	15.6637	9.48104	13.3921	7.80085	11.6722	10.3975	31.2265	15.7379	9.68608	34.0128	34.5852	17.6419	10.1991	7.2799	6.92371	7.90088	9.95172	9.76844	51.4376	22.7826	14.5086	7.47047	8.42886	14.9577	28.2583	10.0198	17.798	14.3602	21.2963	14.9688	36.3427	31.0524
455	15.7046	12.0715	8.06557	15.5603	9.51392	10.0807	9.17783	15.6671	9.50959	13.4164	7.7995	11.675	10.4201	31.2614	15.7349	9.70125	34.1	34.7012	17.6604	10.2208	7.27888	6.9255	7.88995	9.95293	9.7472	51.5196	22.8046	14.525	7.42838	8.46618	14.9706	28.2831	10.0002	17.8223	14.3784	21.3393	15.0083	36.3875	31.1103
456	15.7105	12.105	8.05588	15.598	9.51791	10.0848	9.20399	15.6823	9.53827	13.4276	7.7933	11.6761	10.4375	31.3136	15.7291	9.71441	34.171	34.8069	17.6597	10.2165	7.28026	6.94187	7.89371	9.95826	9.75144	51.6027	22.8145	14.5369	7.39671	8.50374	14.9823	28.3072	9.98432	17.8561	14.4036	21.3838	15.0571	36.4448	31.1755
457	15.721	12.1537	8.02584	15.655	9.51555	10.0875	9.21851	15.7336	9.54131	13.4295	7.77832	11.6742	10.4296	31.3729	15.7365	9.73064	34.217	34.8978	17.6447	10.2049	7.29261	6.95926	7.89889	9.97278	9.80382	51.6794	22.8151	14.5661	7.41106	8.53921	15.0016	28.3258	10.0091	17.9233	14.4539	21.4215	15.0632	36.5153	31.2166
458	15.7276	12.2018	8.02134	15.6844	9.51551	10.0675	9.20753	15.7362	9.52337	13.4323	7.78751	11.692	10.4422	31.3925	15.7214	9.76872	34.2873	35.0003	17.6544	10.2582	7.31158	6.95699	7.91429	9.98224	9.79869	51.7471	22.8729	14.5912	7.43614	8.53293	15.0277	28.3379	10.0413	17.939	14.4713	21.464	15.1065	36.5625	31.2537
459	15.7464	12.2557	8.02877	15.7098	9.52049	10.0488	9.21922	15.7489	9.51556	13.4386	7.8132	11.7148	10.4546	31.4243	15.7224	9.79515	34.3677	35.1124	17.6712	10.2721	7.32668	6.97434	7.90511	9.97825	9.78064	51.8088	22.8961	14.6249	7.45404	8.55063	15.049	28.3516	10.0583	17.9752	14.5032	21.5062	15.171	36.5956	31.2936
460	15.7715	12.3103	8.03764	15.7405	9.52281	10.0474	9.24189	15.7791	9.5315	13.4452	7.83443	11.7351	10.4631	31.478	15.7399	9.80857	34.4457	35.2254	17.6894	10.2433	7.33172	7.00078	7.88026	9.9758	9.76867	51.8714	22.8838	14.6572	7.45655	8.59734	15.0563	28.3738	10.0562	18.0352	14.5503	21.5327	15.1819	36.6525	31.3355
461	15.7772	12.3488	8.0376	15.7737	9.5012	10.0768	9.19643	15.7841	9.57136	13.4411	7.81003	11.7507	10.4807	31.5237	15.7346	9.84051	34.5063	35.3224	17.7136	10.2707	7.32279	6.9717	7.89709	10.0196	9.76139	51.9483	22.9269	14.6517	7.44463	8.61649	15.038	28.4125	10.0491	18.0531	14.5646	21.572	15.2032	36.6952	31.3729
462	15.79	12.3733	8.03565	15.7998	9.49483	10.0716	9.21448	15.8089	9.58375	13.4483	7.80352	11.7599	10.4798	31.5473	15.7435	9.8648	34.5745	35.4041	17.7279	10.2919	7.32685	6.95543	7.88369	10.0327	9.76497	52.0063	22.9663	14.6714	7.43061	8.65891	15.0643	28.437	10.0554	18.0845	14.61	21.6129	15.244	36.726	31.4076
463	15.8046	12.3922	8.03443	15.82	9.49874	10.0493	9.26037	15.8353	9.5735	13.4572	7.82295	11.7578	10.4792	31.567	15.7603	9.87958	34.6392	35.4844	17.7255	10.2991	7.34232	6.95775	7.85418	10.0185	9.76993	52.0546	22.9895	14.7047	7.41541	8.70519	15.1057	28.4502	10.0698	18.1284	14.6641	21.6418	15.2911	36.758	31.444
464	15.8044	12.4169	8.03405	15.8402	9.49208	10.0572	9.23916	15.8253	9.56919	13.4485	7.85158	11.7419	10.5121	31.6116	15.7636	9.89256	34.6785	35.5802	17.7063	10.3033	7.35504	6.96083	7.85336	10.0127	9.76293	52.1156	23.0002	14.7125	7.39689	8.71353	15.0986	28.468	10.0766	18.165	14.6772	21.6717	15.2902	36.8117	31.4876
465	15.8166	12.4534	8.01588	15.8683	9.49286	10.0537	9.2147	15.8317	9.57352	13.4574	7.84752	11.7557	10.5324	31.6439	15.7682	9.91702	34.7334	35.6581	17.7088	10.3054	7.35367	6.95971	7.85856	10.0305	9.77815	52.1388	23.012	14.7185	7.39778	8.72634	15.1211	28.4797	10.073	18.2096	14.7171	21.6965	15.2944	36.8569	31.5244
466	15.8244	12.4802	8.00339	15.8966	9.49355	10.0462	9.21482	15.8438	9.58557	13.4583	7.83496	11.7716	10.5393	31.6683	15.7648	9.93336	34.7911	35.7427	17.7122	10.331	7.3531	6.95823	7.85216	10.0367	9.79397	52.1699	23.0229	14.7355	7.40016	8.74532	15.1366	28.4869	10.0736	18.2481	14.7612	21.7194	15.328	36.8848	31.5505
467	15.8155	12.4873	8.01288	15.9179	9.48591	10.041	9.24774	15.8451	9.60003	13.4358	7.83895	11.7642	10.5388	31.6961	15.749	9.92911	34.8364	35.8513	17.697	10.3848	7.36456	6.95866	7.82856	10.0109	9.79067	52.2458	23.0322	14.7649	7.39057	8.76442	15.1156	28.4957	10.0875	18.2714	14.7836	21.7603	15.3743	36.9178	31.5769
468	15.8293	12.5325	8.00152	15.9412	9.47316	9.99854	9.26942	15.8423	9.59991	13.4678	7.83368	11.7699	10.5266	31.7356	15.7526	9.94456	34.8861	35.9291	17.6953	10.3714	7.36297	6.94842	7.8297	10.0387	9.79862	52.3041	23.0576	14.7648	7.41151	8.77482	15.1417	28.5239	10.0888	18.3071	14.8096	21.7826	15.4114	36.9534	31.6032
469	15.8399	12.568	7.98172	15.9537	9.47655	9.97845	9.29065	15.8541	9.59987	13.4811	7.83061	11.7716	10.5256	31.7722	15.7584	9.96492	34.9347	36.0105	17.7001	10.3621	7.3605	6.93144	7.82409	10.058	9.7969	52.3327	23.0848	14.7665	7.39452	8.7908	15.1603	28.5497	10.0861	18.3642	14.8474	21.7922	15.4357	36.9914	31.6308
470	15.8381	12.5762	7.96621	15.9564	9.49236	9.99742	9.30781	15.881	9.60626	13.4549	7.83449	11.7677	10.5415	31.7991	15.7584	9.98149	34.9818	36.1056	17.7051	10.3867	7.36531	6.91736	7.80674	10.0447	9.78532	52.3434	23.1027	14.7901	7.33657	8.81306	15.1525	28.5625	10.0887	18.4308	14.8964	21.8104	15.4543	37.0305	31.6605
471	15.8463	12.6001	7.96709	15.9787	9.46366	9.98849	9.27821	15.8889	9.61042	13.4755	7.836	11.7915	10.5488	31.8229	15.7657	9.99997	35.04	36.1727	17.7078	10.3858	7.37747	6.92674	7.83334	10.0541	9.81005	52.3908	23.103	14.8399	7.3692	8.80966	15.1744	28.5707	10.1087	18.4534	14.9415	21.8383	15.4872	37.0631	31.6885
472	15.8556	12.6277	7.96731	15.9967	9.46045	9.97843	9.27262	15.9043	9.59866	13.4836	7.83591	11.8068	10.5562	31.8576	15.7619	10.022	35.0896	36.248	17.7017	10.4146	7.39167	6.95119	7.82522	10.0572	9.8188	52.4314	23.1219	14.8647	7.38572	8.84448	15.1907	28.5919	10.1116	18.4849	14.9897	21.848	15.519	37.0939	31.716
473	15.8684	12.656	7.96291	16.0167	9.481	9.97122	9.29287	15.9238	9.58448	13.4759	7.83488	11.8097	10.5623	31.896	15.7574	10.043	35.1329	36.3381	17.6995	10.4601	7.40173	6.97497	7.79596	10.0567	9.81036	52.4665	23.1523	14.8695	7.37099	8.90362	15.2067	28.6255	10.1038	18.5307	15.0378	21.8341	15.5396	37.1283	31.7479
474	15.8913	12.6859	7.95827	16.0652	9.47465	9.9584	9.29321	15.9243	9.60284	13.4847	7.83406	11.8175	10.5594	31.9142	15.7839	10.0532	35.1876	36.4312	17.7291	10.4617	7.40037	6.97436	7.82421	10.0757	9.81788	52.5266	23.1554	14.9006	7.36737	8.91736	15.2543	28.6577	10.1208	18.5656	15.0757	21.8612	15.5624	37.1709	31.7999
475	15.8976	12.71	7.95836	16.0917	9.47281	9.96191	9.30131	15.9277	9.60039	13.5011	7.8407	11.8264	10.5618	31.9372	15.782	10.0702	35.2466	36.528	17.7259	10.4627	7.40015	6.96951	7.82864	10.0752	9.83137	52.5812	23.1918	14.9143	7.37401	8.93808	15.2756	28.6756	10.118	18.5916	15.1174	21.8845	15.6039	37.2167	31.8468
476	15.8993	12.7303	7.95558	16.1059	9.4703	9.96577	9.30528	15.9374	9.59189	13.5061	7.84475	11.8344	10.575	31.9642	15.7631	10.0971	35.3041	36.6186	17.7092	10.4716	7.40962	6.96356	7.80854	10.0711	9.83667	52.6326	23.2301	14.9222	7.37362	8.97043	15.2785	28.6832	10.1132	18.6166	15.1587	21.8918	15.654	37.2618	31.888
477	15.9115	12.7532	7.94021	16.1328	9.45617	9.94899	9.2901	15.9499	9.60617	13.4858	7.83491	11.8392	10.597	31.9872	15.7576	10.1307	35.355	36.6918	17.718	10.4859	7.43188	6.95617	7.78771	10.0881	9.82445	52.6911	23.2246	14.947	7.35053	9.0048	15.2886	28.6911	10.1355	18.6508	15.1932	21.897	15.6799	37.3034	31.9427
478	15.9127	12.7971	7.91584	16.1611	9.45393	9.94921	9.30357	15.9503	9.61586	13.4975	7.83601	11.8377	10.5888	31.9995	15.762	10.155	35.3971	36.7449	17.7314	10.4918	7.43867	6.95601	7.78704	10.083	9.84385	52.7534	23.2494	14.9686	7.35439	9.02664	15.3002	28.708	10.1502	18.6997	15.2335	21.9053	15.7047	37.3429	31.9839
479	15.9214	12.8424	7.90162	16.1839	9.45012	9.94167	9.3193	15.947	9.61548	13.5128	7.82919	11.8474	10.5803	32.018	15.7723	10.172	35.4433	36.8104	17.7493	10.508	7.44624	6.95667	7.78967	10.0784	9.84944	52.8012	23.2672	14.9933	7.36173	9.04749	15.3135	28.7246	10.147	18.7386	15.2837	21.9116	15.7365	37.3846	32.0135
480	15.9467	12.8734	7.90782	16.1998	9.4373	9.91415	9.31565	15.9486	9.60733	13.5099	7.80856	11.8708	10.5931	32.0533	15.7816	10.1873	35.4987	36.9036	17.7678	10.5394	7.46408	6.95369	7.78449	10.0903	9.81664	52.829	23.2585	15.0272	7.35263	9.07748	15.3293	28.7384	10.1313	18.7599	15.339	21.9092	15.7778	37.4306	32.0434
481	15.9569	12.8979	7.9174	16.2236	9.43926	9.9115	9.30875	15.9597	9.60813	13.5142	7.82338	11.8566	10.5987	32.0928	15.7716	10.211	35.5413	36.9825	17.7636	10.5363	7.46447	6.9525	7.7948	10.0934	9.80948	52.8697	23.2961	15.0689	7.3395	9.1175	15.351	28.7782	10.1464	18.8179	15.3683	21.9043	15.8251	37.47	32.0946
482	15.9599	12.9164	7.92008	16.2439	9.43816	9.92029	9.30219	15.9621	9.6094	13.5285	7.83232	11.8524	10.6167	32.1258	15.7683	10.2368	35.5852	37.0586	17.7659	10.5464	7.47072	6.95846	7.78824	10.1039	9.82941	52.937	23.3327	15.108	7.34509	9.13747	15.3711	28.8044	10.1654	18.8752	15.4035	21.9006	15.8617	37.504	32.128
483	15.9645	12.9294	7.91303	16.2601	9.43338	9.92188	9.30154	15.9557	9.60932	13.5465	7.8254	11.8704	10.6451	32.1474	15.7754	10.2539	35.6366	37.1328	17.7863	10.5792	7.48925	6.96907	7.76727	10.1222	9.85579	53.0177	23.3527	15.142	7.36372	9.13797	15.3851	28.8103	10.1812	18.9164	15.4521	21.8984	15.8861	37.5353	32.1381
484	15.9789	12.9364	7.9009	16.2876	9.44892	9.88313	9.31647	15.9639	9.61581	13.5476	7.83237	11.8764	10.6521	32.1574	15.7674	10.2389	35.6938	37.1911	17.818	10.5943	7.50615	6.96996	7.78218	10.1264	9.83168	53.0596	23.3801	15.1794	7.34759	9.16047	15.3912	28.8317	10.2148	18.9545	15.4908	21.8907	15.9243	37.5686	32.1887
485	15.9913	12.958	7.90177	16.3042	9.45346	9.86997	9.33975	15.9778	9.61192	13.5684	7.84553	11.8994	10.6619	32.1815	15.7717	10.2597	35.7459	37.2591	17.8261	10.619	7.51543	6.98164	7.79897	10.1345	9.83208	53.1054	23.3971	15.2003	7.36287	9.18274	15.403	28.8542	10.2306	18.9711	15.5328	21.8859	15.9623	37.604	32.2338
486	16.0049	12.9911	7.90753	16.3212	9.447	9.88301	9.36075	15.995	9.60504	13.5963	7.85641	11.9292	10.6788	32.2155	15.7804	10.309	35.7951	37.3386	17.8266	10.6434	7.52309	6.99718	7.80398	10.1465	9.84679	53.1608	23.4051	15.2227	7.38829	9.20428	15.4239	28.8775	10.2355	18.9912	15.5826	21.8801	16.0032	37.6416	32.2622
487	16.0335	13.0208	7.89729	16.3631	9.44379	9.8915	9.36693	16.0144	9.61293	13.5974	7.85534	11.9384	10.6992	32.2408	15.7705	10.3429	35.8494	37.4192	17.8598	10.6439	7.54081	6.99717	7.79258	10.1554	9.82817	53.2174	23.4149	15.2807	7.3653	9.23338	15.4516	28.9059	10.2547	19.0568	15.6401	21.8637	16.0577	37.6818	32.2821
488	16.0374	13.0488	7.88392	16.3876	9.43999	9.8879	9.36441	16.0184	9.60636	13.6022	7.85892	11.9433	10.7212	32.2616	15.7694	10.3677	35.9011	37.4632	17.8807	10.6696	7.54439	6.98704	7.80234	10.181	9.81402	53.2937	23.4449	15.3294	7.36933	9.27867	15.4783	28.9195	10.2624	19.0787	15.6687	21.8447	16.1121	37.7371	32.3415
489	16.0393	13.0787	7.87345	16.404	9.43797	9.88001	9.36284	16.0159	9.59605	13.6138	7.86491	11.9448	10.744	32.278	15.7725	10.3891	35.9574	37.5108	17.8983	10.7002	7.55321	6.98439	7.81168	10.2025	9.79886	53.3651	23.4722	15.3735	7.38595	9.32511	15.5004	28.9302	10.2636	19.0962	15.6965	21.8279	16.1644	37.7919	32.4007
490	16.062	13.1134	7.8693	16.4272	9.44003	9.87747	9.36752	16.0185	9.59639	13.629	7.86742	11.9437	10.767	32.2913	15.77	10.4118	36.0238	37.5983	17.9258	10.7125	7.58337	7.00079	7.79783	10.2023	9.77666	53.4091	23.4766	15.424	7.38992	9.35764	15.5172	28.9513	10.27	19.1527	15.7517	21.8134	16.2145	37.8328	32.427
491	16.08	13.1502	7.87071	16.4422	9.44598	9.87915	9.35769	16.0205	9.59733	13.64	7.86238	11.9531	10.7893	32.3117	15.7566	10.4328	36.0836	37.6565	17.9408	10.7453	7.58764	7.00782	7.79579	10.2187	9.78273	53.453	23.491	15.4655	7.40087	9.38466	15.5356	28.9705	10.295	19.1719	15.7921	21.7879	16.2597	37.8687	32.4676
492	16.0983	13.1772	7.86517	16.4605	9.4423	9.86973	9.3511	16.0323	9.59689	13.6508	7.85858	11.9627	10.7923	32.3267	15.7449	10.4502	36.1366	37.7063	17.9555	10.7767	7.59847	7.00635	7.79968	10.2334	9.79304	53.4982	23.5182	15.5201	7.40087	9.40852	15.5507	28.9852	10.3013	19.2036	15.8254	21.7654	16.3097	37.9201	32.5225
493	16.1172	13.1914	7.85033	16.4861	9.42979	9.85048	9.35205	16.0538	9.5998	13.6637	7.85906	11.9696	10.7832	32.3344	15.7406	10.4648	36.1823	37.7633	17.9782	10.7945	7.62807	7.00289	7.80301	10.2415	9.79177	53.5391	23.5511	15.5895	7.38816	9.43201	15.5621	29.0001	10.2865	19.2637	15.86	21.7497	16.37	37.9806	32.5756
494	16.1148	13.2087	7.84518	16.5034	9.44186	9.86087	9.32856	16.058	9.63054	13.6738	7.85001	11.99	10.8331	32.3603	15.7335	10.4813	36.2132	37.8239	18.0067	10.81	7.63654	7.01232	7.80206	10.2746	9.78325	53.5575	23.5629	15.6238	7.39926	9.45963	15.5791	29.035	10.3324	19.2816	15.8991	21.7315	16.4433	38.0094	32.5896
495	16.1295	13.2307	7.84397	16.5249	9.45215	9.8665	9.32066	16.0782	9.63136	13.6993	7.86566	12.0047	10.8515	32.3629	15.7418	10.4992	36.2515	37.8735	18.0369	10.8427	7.65119	7.02403	7.80645	10.3027	9.78881	53.5771	23.5865	15.6833	7.41052	9.49488	15.6136	29.0716	10.3556	19.3071	15.9556	21.7065	16.4961	38.0394	32.6195
496	16.1568	13.2533	7.84504	16.5489	9.45379	9.86019	9.33993	16.1057	9.60779	13.725	7.89647	12.0139	10.8442	32.3523	15.7579	10.518	36.304	37.9175	18.0655	10.8872	7.67452	7.03411	7.81751	10.3187	9.79841	53.602	23.6246	15.7715	7.42326	9.52509	15.6555	29.1043	10.3603	19.3523	16.0192	21.6837	16.5384	38.0802	32.659
497	16.1576	13.2663	7.84945	16.5619	9.45393	9.85485	9.37773	16.0965	9.61849	13.7053	7.89523	12.033	10.896	32.3818	15.7529	10.5363	36.3666	37.9792	18.0897	10.9161	7.69006	7.04324	7.8301	10.3317	9.77395	53.6205	23.6559	15.8476	7.45916	9.52139	15.6743	29.1361	10.4219	19.4028	16.0582	21.6726	16.5943	38.1301	32.6825
498	16.1714	13.2824	7.83903	16.5866	9.45149	9.8519	9.39084	16.1057	9.60672	13.7229	7.90843	12.07	10.9277	32.3983	15.7458	10.5591	36.4175	38.0367	18.1281	10.9407	7.71156	7.04383	7.84005	10.3531	9.75638	53.6416	23.6795	15.9115	7.46923	9.54158	15.6987	29.1732	10.4509	19.449	16.1167	21.6409	16.6508	38.157	32.7016
499	16.1869	13.2959	7.82448	16.6113	9.45393	9.84986	9.38246	16.1262	9.60336	13.7548	7.92908	12.099	10.9438	32.4034	15.7394	10.5759	36.459	38.083	18.1667	10.9669	7.73419	7.04465	7.84518	10.3802	9.75513	53.6554	23.7015	15.9744	7.46227	9.57563	15.7231	29.2081	10.4576	19.4858	16.1761	21.6101	16.7101	38.1817	32.7321
500	16.183	13.299	7.82411	16.6169	9.46801	9.84626	9.3743	16.1338	9.65121	13.7522	7.93505	12.0912	10.9715	32.4147	15.733	10.575	36.5018	38.1168	18.1864	10.9987	7.74876	7.05707	7.84656	10.4048	9.76726	53.6505	23.7291	16.0498	7.4652	9.59404	15.7349	29.2313	10.4808	19.5132	16.2047	21.5935	16.7729	38.22	32.7753
501	16.1916	13.3217	7.8266	16.6309	9.46939	9.84587	9.3913	16.1472	9.63233	13.7756	7.92634	12.1122	10.99	32.4353	15.7388	10.5887	36.5499	38.1427	18.2279	11.0274	7.76326	7.05944	7.86598	10.4174	9.772	53.6549	23.7472	16.1195	7.4765	9.609	15.7647	29.255	10.5067	19.5594	16.2524	21.571	16.8297	38.2633	32.7936
502	16.2068	13.3406	7.82855	16.6468	9.4683	9.83947	9.40399	16.1604	9.60546	13.7966	7.92985	12.1398	11.011	32.4557	15.7402	10.6083	36.5947	38.1753	18.2686	11.0547	7.77669	7.06706	7.88037	10.4373	9.78138	53.6608	23.7674	16.1931	7.50085	9.63216	15.7851	29.2868	10.5323	19.6057	16.3082	21.5336	16.8918	38.2923	32.811
503	16.2185	13.3395	7.82555	16.6565	9.47319	9.82228	9.3947	16.1672	9.6187	13.7948	7.95477	12.1504	11.0426	32.4686	15.7287	10.6233	36.631	38.2191	18.2929	11.0843	7.78955	7.08664	7.87572	10.4718	9.79657	53.6595	23.7971	16.2777	7.53192	9.66459	15.7822	29.3282	10.5567	19.6368	16.3589	21.4924	16.9577	38.311	32.8368
504	16.2229	13.3477	7.80243	16.6626	9.47033	9.8065	9.40864	16.1708	9.60802	13.8127	7.94117	12.1524	11.0684	32.4767	15.7337	10.6382	36.6699	38.2458	18.335	11.1258	7.81251	7.07979	7.88499	10.4778	9.76485	53.6575	23.8201	16.3645	7.52355	9.67259	15.8103	29.3663	10.5829	19.6681	16.4118	21.4749	17.0159	38.3431	32.8696
505	16.2216	13.3512	7.79262	16.665	9.47294	9.80049	9.41696	16.1752	9.60733	13.8329	7.93362	12.1713	11.0855	32.4871	15.7324	10.6425	36.7101	38.2605	18.3771	11.1496	7.83185	7.0802	7.89804	10.4779	9.738	53.6479	23.8424	16.4445	7.52805	9.68216	15.8288	29.3966	10.5995	19.7091	16.4624	21.4479	17.0812	38.3803	32.8867
506	16.2201	13.3474	7.80149	16.6681	9.48132	9.80213	9.41098	16.1841	9.62102	13.8461	7.94727	12.2048	11.1026	32.5012	15.7203	10.6373	36.7474	38.2715	18.414	11.1615	7.84457	7.09621	7.90715	10.4903	9.73655	53.631	23.8657	16.5228	7.56123	9.70403	15.8306	29.4229	10.6149	19.7571	16.5101	21.4156	17.1466	38.4088	32.8917
507	16.229	13.3541	7.79425	16.6869	9.47547	9.79394	9.40879	16.2029	9.60803	13.8523	7.95692	12.2087	11.1488	32.5131	15.7207	10.6415	36.7708	38.2925	18.4578	11.2241	7.86199	7.10045	7.90459	10.5323	9.73969	53.6195	23.8844	16.6277	7.59014	9.73252	15.8595	29.4614	10.6737	19.7907	16.5603	21.3891	17.2019	38.4191	32.8942
508	16.2344	13.3374	7.79191	16.6865	9.47777	9.7869	9.42184	16.2131	9.60714	13.8633	7.96554	12.2243	11.1899	32.5252	15.7149	10.6405	36.8052	38.3169	18.504	11.269	7.88707	7.10207	7.92301	10.5627	9.7434	53.5968	23.9113	16.7207	7.61032	9.72603	15.8753	29.502	10.7101	19.821	16.6143	21.3602	17.2536	38.4371	32.8937
509	16.2356	13.309	7.79128	16.6769	9.48487	9.78478	9.4336	16.2199	9.61648	13.8805	7.97511	12.2514	11.2179	32.5342	15.7112	10.6374	36.8441	38.3356	18.5504	11.2974	7.91293	7.10958	7.94836	10.5821	9.74831	53.5576	23.9467	16.8048	7.62663	9.70328	15.8841	29.5411	10.7276	19.8517	16.6705	21.3303	17.31	38.4512	32.8863
510	16.2394	13.3029	7.77944	16.6898	9.4819	9.78825	9.41399	16.24	9.6152	13.8997	7.98835	12.2702	11.2374	32.5352	15.7289	10.6431	36.8658	38.3381	18.5954	11.3423	7.92775	7.1318	7.94428	10.6112	9.75787	53.5029	23.9844	16.9028	7.65082	9.71428	15.912	29.5776	10.7621	19.8844	16.7249	21.3012	17.3749	38.4611	32.8817
511	16.2368	13.2848	7.78477	16.6944	9.49269	9.78589	9.42712	16.2562	9.60681	13.9108	8.00137	12.2832	11.2636	32.5509	15.7302	10.6477	36.9002	38.3467	18.6468	11.3717	7.95695	7.14477	7.9649	10.6448	9.75377	53.4463	24.0116	17.0007	7.68492	9.72388	15.925	29.6143	10.7918	19.9252	16.7678	21.2746	17.4455	38.4913	32.9175
512	16.2344	13.2692	7.79491	16.6948	9.50724	9.78111	9.44776	16.2678	9.60445	13.9233	8.01373	12.3025	11.2954	32.5629	15.7231	10.65	36.9394	38.3555	18.6938	11.4053	7.98871	7.14947	7.99112	10.6793	9.74748	53.4228	24.0305	17.0989	7.70756	9.72986	15.9397	29.6536	10.8246	19.9691	16.8123	21.2431	17.5185	38.5412	32.9704
513	16.2399	13.2749	7.79298	16.7004	9.51159	9.77955	9.44196	16.2771	9.61798	13.9443	8.0237	12.3355	11.3286	32.5547	15.7222	10.6536	36.9728	38.3567	18.7295	11.4628	8.00952	7.15231	7.99877	10.7101	9.75177	53.4582	24.0483	17.2005	7.70539	9.73992	15.9743	29.6961	10.8678	20.0084	16.8701	21.2106	17.5982	38.6028	33.0323
514	16.2572	13.2868	7.78814	16.7043	9.51107	9.78035	9.43714	16.2824	9.62926	13.9405	8.01694	12.351	11.3657	32.5669	15.7197	10.6772	37.0205	38.3645	18.7871	11.5055	8.0435	7.15447	8.02642	10.7264	9.7507	53.518	24.0781	17.3098	7.73468	9.7772	16.0008	29.7356	10.8948	20.0313	16.9165	21.1863	17.6916	38.6627	33.1003
515	16.281	13.3088	7.78027	16.7207	9.51356	9.77634	9.43756	16.2967	9.63562	13.9441	8.01551	12.3635	11.3984	32.5799	15.7186	10.714	37.0709	38.3816	18.8456	11.5458	8.06934	7.16124	8.04206	10.748	9.74378	53.5794	24.1083	17.4147	7.75774	9.82665	16.0274	29.7749	10.9271	20.0642	16.9622	21.153	17.7712	38.7193	33.1625
516	16.3073	13.3388	7.76978	16.7517	9.51879	9.76398	9.44213	16.3181	9.6341	13.9669	8.03016	12.3827	11.4244	32.5809	15.7199	10.7513	37.1156	38.4037	18.8927	11.5909	8.08153	7.17348	8.03734	10.7828	9.73249	53.6301	24.1333	17.5121	7.76107	9.87466	16.0587	29.8161	10.9728	20.1141	17.0119	21.1179	17.8435	38.772	33.2085
517	16.328	13.3601	7.75785	16.7717	9.50595	9.74521	9.44001	16.3061	9.61378	13.9696	8.04742	12.404	11.4549	32.5792	15.7189	10.7659	37.155	38.4115	18.9418	11.6318	8.11598	7.18386	8.0653	10.8099	9.71679	53.6759	24.1648	17.6216	7.79776	9.91547	16.0884	29.859	11.0039	20.1432	17.0513	21.0895	17.9186	38.8174	33.2357
518	16.3483	13.369	7.75704	16.7846	9.50652	9.73735	9.45506	16.3137	9.60622	13.9702	8.04627	12.4195	11.4835	32.5771	15.7088	10.7792	37.2027	38.4284	18.9924	11.6668	8.1421	7.1873	8.08772	10.8383	9.72071	53.7097	24.1873	17.7307	7.82378	9.95165	16.1121	29.8975	11.0426	20.1714	17.0981	21.0616	17.9954	38.8378	33.2681
519	16.3649	13.3644	7.7606	16.7927	9.51771	9.73904	9.475	16.3399	9.61247	13.9776	8.03509	12.4299	11.5091	32.5764	15.6943	10.7929	37.2526	38.4549	19.0442	11.6999	8.15666	7.1876	8.09735	10.8679	9.73389	53.7196	24.204	17.8394	7.83772	9.97862	16.1262	29.9322	11.0885	20.2049	17.1514	21.0431	18.0635	38.8463	33.274
520	16.3636	13.3483	7.74396	16.7986	9.50748	9.73254	9.45506	16.3393	9.60796	13.9955	8.04911	12.4438	11.5339	32.5786	15.6913	10.794	37.281	38.4735	19.0957	11.7414	8.17803	7.19686	8.11023	10.8916	9.71488	53.6885	24.2345	17.957	7.87265	9.98579	16.1271	29.9693	11.1225	20.2402	17.1948	21.0286	18.1212	38.8469	33.2453
521	16.3552	13.3088	7.74192	16.7884	9.51435	9.73973	9.45065	16.3472	9.61105	14.003	8.05438	12.4719	11.5842	32.5849	15.6946	10.7865	37.3044	38.4885	19.1533	11.7913	8.19727	7.20675	8.1331	10.9214	9.71219	53.6277	24.2605	18.0746	7.8997	9.9725	16.134	30.0084	11.1625	20.2693	17.2351	20.9914	18.1766	38.8289	33.2008
522	16.3435	13.2503	7.74599	16.766	9.52627	9.74553	9.45901	16.3615	9.61509	14.0074	8.06026	12.5013	11.6354	32.5871	15.6956	10.7654	37.3208	38.4936	19.2182	11.8374	8.21979	7.21723	8.15894	10.956	9.71766	53.5414	24.2884	18.1938	7.92385	9.94042	16.1444	30.0455	11.2073	20.2943	17.2774	20.9623	18.2282	38.8148	33.1769
523	16.3285	13.1862	7.73767	16.743	9.52007	9.72899	9.46038	16.3709	9.60895	14.0235	8.08539	12.5145	11.6543	32.5771	15.6866	10.7284	37.327	38.4808	19.288	11.8675	8.254	7.23042	8.17743	10.9902	9.70875	53.4369	24.3281	18.3181	7.95844	9.89806	16.1522	30.0777	11.251	20.3207	17.3258	20.9421	18.294	38.8302	33.1919
524	16.3254	13.1451	7.74432	16.7337	9.53066	9.73189	9.46166	16.3871	9.61563	14.0379	8.10213	12.5382	11.7066	32.5749	15.6904	10.7145	37.3542	38.4541	19.3429	11.9109	8.29531	7.24498	8.20121	11.0274	9.70869	53.3534	24.3469	18.4388	7.99163	9.8927	16.1899	30.1269	11.3018	20.3444	17.3712	20.9204	18.3954	38.8977	33.2536
525	16.3412	13.1414	7.75248	16.7387	9.54102	9.74042	9.46481	16.4056	9.62257	14.0536	8.11392	12.566	11.7583	32.572	15.6958	10.7291	37.3963	38.4244	19.4019	11.9683	8.33605	7.25984	8.22488	11.0639	9.70908	53.305	24.3692	18.5614	8.02021	9.91963	16.2409	30.18	11.349	20.3691	17.4111	20.8993	18.5078	38.9936	33.359
526	16.3777	13.1779	7.7501	16.7576	9.53909	9.74098	9.46899	16.4204	9.62031	14.0714	8.12675	12.5915	11.7847	32.5626	15.6921	10.7701	37.4453	38.4015	19.4773	12.0322	8.37257	7.27389	8.2458	11.0988	9.70411	53.3027	24.4111	18.6903	8.04656	9.97207	16.2898	30.2271	11.3883	20.3977	17.4473	20.8814	18.6231	39.1027	33.4893
527	16.4284	13.2379	7.74458	16.7939	9.55104	9.74524	9.464	16.4254	9.62504	14.0768	8.14167	12.6224	11.831	32.5612	15.6833	10.8331	37.5064	38.3868	19.5436	12.0858	8.41505	7.2844	8.27942	11.1446	9.70921	53.3672	24.437	18.8189	8.08778	10.0661	16.3474	30.2841	11.4414	20.4276	17.492	20.8673	18.7352	39.2098	33.6179
528	16.4879	13.3159	7.7453	16.8458	9.55526	9.74537	9.46929	16.4316	9.62038	14.0887	8.15079	12.6488	11.8734	32.5582	15.6828	10.9079	37.578	38.3891	19.6116	12.1369	8.45525	7.3019	8.30552	11.1832	9.71759	53.4829	24.4717	18.9539	8.12666	10.1857	16.3999	30.3393	11.496	20.4575	17.5347	20.8529	18.8349	39.2952	33.7024
529	16.5497	13.3973	7.75152	16.9045	9.5501	9.73826	9.48492	16.4414	9.61001	14.1064	8.15504	12.6676	11.906	32.5536	15.6896	10.9811	37.6528	38.4066	19.6837	12.1903	8.49069	7.32332	8.32229	11.2144	9.71997	53.6218	24.5193	19.0935	8.15751	10.3057	16.4432	30.3896	11.5455	20.4871	17.5718	20.8316	18.9292	39.3636	33.7687
530	16.5922	13.452	7.74867	16.9501	9.56372	9.72526	9.48367	16.4452	9.62929	14.0993	8.16822	12.6836	11.9467	32.5621	15.683	11.0341	37.7153	38.4227	19.7502	12.2457	8.52689	7.32444	8.35384	11.2641	9.69968	53.7362	24.5547	19.2238	8.19026	10.3834	16.4871	30.4441	11.589	20.5182	17.6075	20.8049	19.0196	39.4193	33.8298
531	16.6265	13.4894	7.74362	16.9915	9.56318	9.72347	9.48151	16.4484	9.63206	14.1014	8.17764	12.7022	11.9905	32.5617	15.6771	11.075	37.7724	38.4439	19.8145	12.3085	8.56013	7.33584	8.38377	11.2988	9.69052	53.8296	24.5915	19.3564	8.21732	10.4497	16.5249	30.4903	11.6427	20.5501	17.6521	20.7819	19.1022	39.4663	33.8877
532	16.6569	13.5169	7.73747	17.0315	9.55433	9.72938	9.48028	16.4522	9.62103	14.1135	8.18618	12.7275	12.0341	32.5545	15.6748	11.1101	37.8237	38.4744	19.88	12.3686	8.59254	7.35535	8.41239	11.3262	9.69402	53.9032	24.6267	19.4946	8.24615	10.5123	16.5564	30.5307	11.7004	20.5826	17.7005	20.7703	19.1939	39.5196	33.9485
533	16.6876	13.5425	7.72965	17.0713	9.56018	9.72885	9.47645	16.456	9.62083	14.1219	8.2031	12.7615	12.0742	32.5533	15.6747	11.1452	37.8671	38.5176	19.9509	12.4098	8.62869	7.36612	8.44663	11.3724	9.69665	53.962	24.6513	19.6386	8.29032	10.5708	16.585	30.5754	11.7459	20.6155	17.7406	20.7624	19.2912	39.5803	34.0106
534	16.7198	13.5712	7.72809	17.1086	9.56245	9.71906	9.47344	16.4554	9.61584	14.1338	8.2133	12.7851	12.1056	32.5541	15.6798	11.173	37.922	38.5541	20.0317	12.4593	8.66262	7.37857	8.47657	11.4141	9.70625	54.0376	24.6882	19.7835	8.32795	10.6292	16.6238	30.6316	11.7958	20.6473	17.7845	20.7482	19.3859	39.645	34.0719
535	16.7524	13.5968	7.72846	17.1436	9.56402	9.71255	9.47109	16.4604	9.60973	14.146	8.22374	12.8089	12.1466	32.5555	15.6858	11.2011	37.9832	38.5883	20.1119	12.5195	8.69889	7.39322	8.50592	11.4527	9.71197	54.1179	24.7324	19.9289	8.36407	10.6843	16.6637	30.6916	11.8525	20.6782	17.8269	20.7408	19.4867	39.7119	34.1443
536	16.7852	13.6138	7.72617	17.1766	9.56924	9.71987	9.46949	16.4773	9.60832	14.1544	8.24213	12.8447	12.2111	32.5566	15.6884	11.2362	38.0407	38.6266	20.1834	12.5853	8.74196	7.40859	8.53933	11.4937	9.70489	54.1863	24.7745	20.0763	8.40613	10.7333	16.6961	30.7473	11.9145	20.709	17.863	20.735	19.5901	39.783	34.227
537	16.8171	13.6291	7.72818	17.2074	9.56839	9.72697	9.47313	16.4805	9.60975	14.1589	8.25666	12.8797	12.2693	32.5569	15.6886	11.2665	38.0882	38.6584	20.2636	12.6441	8.78566	7.42182	8.57106	11.5374	9.70004	54.2536	24.8153	20.227	8.44554	10.7795	16.7381	30.8096	11.9765	20.7442	17.9077	20.7275	19.6929	39.856	34.3142
538	16.8493	13.647	7.73258	17.2356	9.57067	9.73117	9.48336	16.4846	9.61616	14.1678	8.27702	12.9138	12.3213	32.5574	15.6898	11.2929	38.1338	38.6831	20.3443	12.6988	8.83075	7.4398	8.60766	11.5808	9.69957	54.3093	24.8578	20.3755	8.4813	10.8309	16.7842	30.8679	12.0401	20.7807	17.9515	20.7222	19.7965	39.9179	34.3924
539	16.8817	13.6671	7.73727	17.2621	9.579	9.73226	9.49455	16.4953	9.6254	14.1837	8.30405	12.9481	12.3707	32.5579	15.6932	11.3185	38.1821	38.7025	20.4225	12.7562	8.87635	7.46221	8.65029	11.6243	9.7021	54.3518	24.901	20.5209	8.51614	10.8883	16.8307	30.9192	12.1052	20.8142	17.9895	20.7144	19.8961	39.9745	34.4616
540	16.913	13.68	7.74029	17.2904	9.58198	9.73217	9.48426	16.4948	9.6259	14.1983	8.31796	12.9854	12.423	32.5555	15.6969	11.3494	38.2319	38.7231	20.5098	12.8314	8.91642	7.47206	8.68841	11.6781	9.69985	54.3998	24.9341	20.6728	8.55896	10.9378	16.8797	30.9784	12.1666	20.8368	18.0275	20.7061	19.9913	40.0309	34.5265
541	16.9448	13.6912	7.74455	17.3173	9.58797	9.73557	9.48456	16.5036	9.6257	14.2049	8.33425	13.022	12.4828	32.557	15.7009	11.3823	38.2761	38.7368	20.5958	12.895	8.9594	7.48996	8.72638	11.724	9.70748	54.4429	24.9744	20.8237	8.60934	10.9888	16.9227	31.0321	12.2321	20.8585	18.0642	20.7035	20.0847	40.092	34.595
542	16.9738	13.7016	7.74958	17.3411	9.59582	9.74198	9.49422	16.5188	9.6281	14.2078	8.35638	13.0582	12.5436	32.5597	15.7042	11.4123	38.3171	38.7472	20.679	12.9476	9.00611	7.51252	8.7656	11.7634	9.72054	54.4807	25.0207	20.9717	8.66072	11.0379	16.9636	31.0817	12.2989	20.8847	18.1001	20.701	20.1872	40.1384	34.6537
543	17.0027	13.7095	7.75243	17.3604	9.59765	9.74683	9.48784	16.52	9.63374	14.2205	8.37988	13.0975	12.5893	32.5534	15.7053	11.4335	38.3645	38.7666	20.7641	13.012	9.05189	7.51864	8.80578	11.8115	9.72018	54.5189	25.0584	21.1178	8.70082	11.0719	17.0154	31.1389	12.3557	20.9185	18.1365	20.6977	20.286	40.1784	34.7075
544	17.0274	13.7116	7.75413	17.3712	9.59756	9.75644	9.48575	16.5227	9.63176	14.2343	8.40337	13.1307	12.6423	32.5472	15.7091	11.4565	38.4058	38.7797	20.8464	13.071	9.09479	7.53341	8.84793	11.8613	9.72074	54.5492	25.0915	21.2681	8.73819	11.1171	17.0556	31.1874	12.4144	20.9438	18.1744	20.694	20.3693	40.2241	34.7643
545	17.0516	13.7108	7.75042	17.379	9.59785	9.76251	9.48916	16.526	9.62542	14.2465	8.42524	13.1611	12.7031	32.5425	15.7136	11.4774	38.4429	38.7842	20.9266	13.1294	9.13585	7.55255	8.88939	11.9075	9.72257	54.5762	25.1216	21.4174	8.77375	11.1636	17.0929	31.2322	12.4772	20.9624	18.2084	20.6914	20.4598	40.2746	34.8236
546	17.0791	13.7107	7.73818	17.3908	9.59948	9.75566	9.49269	16.5252	9.62218	14.2555	8.44486	13.1958	12.7654	32.5382	15.7154	11.4908	38.4807	38.7835	21.007	13.1957	9.17739	7.56525	8.92732	11.947	9.72296	54.606	25.1507	21.5593	8.80752	11.1954	17.1425	31.2827	12.5426	20.9817	18.2337	20.6888	20.5545	40.3186	34.8807
547	17.1029	13.7089	7.73306	17.3973	9.5959	9.75053	9.48314	16.522	9.62645	14.2562	8.46824	13.2373	12.8242	32.5299	15.7143	11.5141	38.5151	38.795	21.0898	13.261	9.22229	7.58042	8.96607	11.9941	9.72564	54.6283	25.1809	21.7048	8.84748	11.2374	17.1943	31.3315	12.6032	21.006	18.2624	20.6866	20.6494	40.3554	34.9357
548	17.1252	13.7085	7.73072	17.4043	9.58973	9.75138	9.47344	16.5206	9.62322	14.2596	8.49136	13.2773	12.8845	32.5205	15.7159	11.5374	38.5486	38.8075	21.1717	13.3179	9.26512	7.59386	9.00634	12.0436	9.72958	54.6418	25.2145	21.8487	8.88986	11.2791	17.2441	31.3797	12.6659	21.0291	18.2988	20.6881	20.7413	40.4041	34.9981
549	17.1485	13.7104	7.7267	17.4153	9.58446	9.75759	9.4726	16.5221	9.60912	14.2718	8.51195	13.3135	12.9491	32.5121	15.7211	11.5547	38.5828	38.8111	21.2512	13.3683	9.30367	7.60439	9.0474	12.0904	9.73322	54.6509	25.2518	21.9881	8.93092	11.3131	17.2903	31.4287	12.734	21.0474	18.34	20.6917	20.8316	40.4518	35.0587
550	17.1724	13.7079	7.72219	17.4218	9.58333	9.75953	9.47141	16.5173	9.62046	14.2813	8.53514	13.3633	13.0098	32.5018	15.7162	11.5785	38.6144	38.8072	21.3333	13.4398	9.34667	7.62372	9.08529	12.1358	9.73484	54.6741	25.291	22.1313	8.97014	11.3502	17.3351	31.4805	12.7963	21.0679	18.3661	20.6969	20.9234	40.4965	35.1188
551	17.1989	13.7064	7.72051	17.4305	9.58249	9.75941	9.47299	16.5184	9.6222	14.2879	8.56126	13.4141	13.0783	32.4912	15.7163	11.597	38.647	38.8058	21.4154	13.5088	9.39004	7.63753	9.12635	12.185	9.73515	54.6961	25.3251	22.2741	9.01301	11.3884	17.3877	31.5301	12.8615	21.0898	18.3901	20.7039	21.0201	40.5413	35.1846
552	17.2247	13.7086	7.72179	17.4426	9.58242	9.76141	9.47832	16.5231	9.60871	14.2948	8.59078	13.4638	13.1563	32.4811	15.7238	11.6107	38.6816	38.809	21.4981	13.5692	9.43384	7.6461	9.17116	12.2363	9.73668	54.7147	25.357	22.4162	9.05889	11.4259	17.4477	31.5783	12.9297	21.1112	18.418	20.7143	21.1096	40.5897	35.2504
553	17.2481	13.7154	7.72229	17.4533	9.58901	9.77301	9.48744	16.5112	9.60623	14.3106	8.62446	13.5217	13.234	32.4726	15.727	11.6352	38.716	38.81	21.586	13.633	9.48339	7.66644	9.2137	12.2791	9.74498	54.743	25.401	22.5621	9.09958	11.4607	17.5032	31.6324	12.9915	21.1275	18.4487	20.7249	21.1951	40.6399	35.3178
554	17.2736	13.7192	7.72739	17.4647	9.59357	9.78529	9.47873	16.5124	9.61126	14.3282	8.65979	13.5809	13.3156	32.4647	15.734	11.6593	38.7512	38.8128	21.6725	13.6985	9.52837	7.6886	9.25983	12.3322	9.74815	54.7576	25.4427	22.7017	9.14864	11.501	17.5625	31.6835	13.0533	21.1503	18.4782	20.7346	21.2828	40.6894	35.3889
555	17.3013	13.7218	7.73426	17.4765	9.59481	9.79744	9.46579	16.524	9.62208	14.3436	8.69766	13.6406	13.4017	32.4569	15.7426	11.6826	38.7865	38.8146	21.7572	13.7664	9.5723	7.70759	9.30596	12.39	9.75219	54.7685	25.4813	22.8376	9.20062	11.5437	17.6278	31.7325	13.1188	21.1741	18.5055	20.7525	21.3793	40.7388	35.4616
556	17.3301	13.728	7.73714	17.488	9.59478	9.81139	9.47499	16.5303	9.63546	14.3546	8.73983	13.703	13.491	32.4491	15.7476	11.708	38.8209	38.8111	21.8423	13.8376	9.62363	7.72087	9.34603	12.4388	9.76856	54.797	25.5207	22.9773	9.24334	11.5815	17.6984	31.7846	13.1901	21.1875	18.5316	20.7695	21.4722	40.7872	35.5302
557	17.3582	13.7339	7.73978	17.5018	9.59876	9.82222	9.48324	16.5339	9.63883	14.3648	8.78116	13.7721	13.5739	32.4424	15.7586	11.7276	38.8524	38.8162	21.9256	13.9013	9.67405	7.73955	9.39378	12.4954	9.77603	54.8163	25.5571	23.1111	9.28745	11.62	17.7657	31.8372	13.2546	21.2063	18.5616	20.7823	21.5574	40.8343	35.5964
558	17.3832	13.7382	7.74156	17.5154	9.60093	9.8344	9.48691	16.5357	9.64052	14.3763	8.81837	13.8415	13.6585	32.4369	15.7703	11.7484	38.8845	38.8186	22.0087	13.9666	9.72174	7.76067	9.44508	12.5529	9.78244	54.8286	25.5915	23.2427	9.32822	11.6589	17.8332	31.8869	13.3216	21.2292	18.5929	20.7954	21.641	40.8808	35.672
559	17.4049	13.7408	7.74154	17.5261	9.59726	9.85045	9.48667	16.537	9.64819	14.3904	8.8521	13.9063	13.7519	32.4308	15.777	11.7749	38.9204	38.8106	22.0918	14.0406	9.76638	7.77923	9.49418	12.6048	9.79518	54.8401	25.6249	23.3755	9.36335	11.6966	17.9046	31.9312	13.3963	21.2519	18.6211	20.8106	21.7283	40.9239	35.7484
560	17.4254	13.7426	7.74013	17.5344	9.59869	9.85928	9.48679	16.5415	9.65227	14.4091	8.89606	13.9734	13.8441	32.4182	15.7836	11.7962	38.9584	38.8165	22.168	14.1111	9.80875	7.79251	9.54234	12.6608	9.79937	54.8529	25.6567	23.504	9.41047	11.7323	17.9754	31.9723	13.454	21.2687	18.6414	20.8262	21.8166	40.967	35.8243
561	17.4449	13.743	7.73748	17.5398	9.59781	9.86648	9.485	16.5427	9.65287	14.4161	8.94105	14.0425	13.9391	32.4038	15.7876	11.8126	38.9912	38.818	22.2422	14.1759	9.85033	7.80361	9.58597	12.7161	9.80802	54.8589	25.6852	23.6253	9.45128	11.7624	18.046	32.0099	13.5072	21.2848	18.6607	20.8399	21.8996	41.0147	35.9004
562	17.4643	13.7413	7.7335	17.5425	9.59204	9.87592	9.4814	16.5392	9.65273	14.4115	8.98267	14.1134	14.0364	32.3899	15.7897	11.8263	39.0172	38.8083	22.3171	14.2366	9.89176	7.8152	9.62594	12.7683	9.82224	54.8565	25.7107	23.7405	9.48098	11.7874	18.1181	32.0451	13.5638	21.3015	18.683	20.8591	21.9766	41.0532	35.9735
563	17.4807	13.7365	7.72742	17.5434	9.58673	9.88945	9.48156	16.5392	9.65982	14.4258	9.02523	14.1872	14.1276	32.3746	15.7966	11.8437	39.0427	38.7997	22.3916	14.3009	9.93281	7.8298	9.67095	12.819	9.82144	54.8547	25.7378	23.8572	9.51764	11.815	18.1964	32.0823	13.625	21.3149	18.7082	20.8799	22.0518	41.089	36.0449
564	17.4949	13.7298	7.72126	17.5433	9.58387	9.89753	9.47124	16.5343	9.66257	14.4345	9.06473	14.2642	14.2194	32.3592	15.8027	11.8526	39.066	38.7888	22.4666	14.3692	9.97323	7.84328	9.71656	12.8692	9.82233	54.8428	25.7589	23.9732	9.55541	11.8358	18.2713	32.1183	13.6828	21.3225	18.7301	20.8988	22.1271	41.1252	36.1119
565	17.5068	13.7194	7.71545	17.5395	9.58172	9.90537	9.458	16.5298	9.66234	14.4378	9.10656	14.3446	14.3199	32.3434	15.8062	11.8561	39.0872	38.7744	22.5412	14.4372	10.0125	7.85449	9.76044	12.9214	9.82893	54.8187	25.7791	24.0845	9.5928	11.8495	18.3458	32.1523	13.7364	21.3281	18.7474	20.9203	22.1946	41.1469	36.157
566	17.5151	13.7019	7.70962	17.5274	9.57612	9.926	9.46135	16.5382	9.66734	14.4484	9.16086	14.4288	14.4376	32.3255	15.8073	11.8661	39.1068	38.7555	22.6133	14.4972	10.0499	7.86393	9.8008	12.9786	9.83897	54.7836	25.8099	24.1857	9.6297	11.8602	18.4295	32.1841	13.7893	21.3391	18.7612	20.9381	22.2533	41.1577	36.1934
567	17.5217	13.6819	7.70523	17.5145	9.57101	9.93529	9.457	16.5381	9.66986	14.457	9.20945	14.5142	14.5497	32.3068	15.8076	11.8687	39.1199	38.7376	22.6815	14.5531	10.0868	7.87485	9.83913	13.0328	9.84217	54.7191	25.8339	24.2884	9.66929	11.8648	18.5045	32.2091	13.8439	21.3449	18.7781	20.953	22.3041	41.1583	36.2227
568	17.5245	13.6542	7.6998	17.4974	9.5675	9.94462	9.4532	16.5334	9.67306	14.4674	9.25823	14.6037	14.6564	32.2868	15.8112	11.8647	39.1285	38.7187	22.7483	14.6148	10.1237	7.88849	9.87892	13.0821	9.84613	54.6232	25.8528	24.3933	9.70575	11.8612	18.5754	32.2333	13.8977	21.3486	18.7957	20.9735	22.3505	41.1465	36.2355
569	17.5209	13.6104	7.69171	17.4687	9.56582	9.96759	9.4598	16.5324	9.68078	14.4831	9.31619	14.6996	14.7647	32.2658	15.8202	11.8557	39.1337	38.6943	22.8166	14.6879	10.1593	7.9041	9.92264	13.1282	9.85845	54.4955	25.8722	24.4966	9.73448	11.8452	18.6495	32.262	13.9486	21.355	18.8102	20.9899	22.3811	41.1068	36.2146
570	17.5036	13.5442	7.6893	17.4166	9.56539	9.98257	9.45272	16.5324	9.68656	14.4918	9.37697	14.7949	14.8837	32.2501	15.8229	11.8323	39.126	38.6588	22.8844	14.7488	10.1881	7.91409	9.96499	13.183	9.86159	54.3193	25.8947	24.5869	9.7685	11.8054	18.7189	32.2875	14.0041	21.3617	18.8206	21.0017	22.3819	41.0243	36.1403
571	17.4689	13.4497	7.68485	17.3385	9.56538	9.99768	9.44849	16.5346	9.69557	14.5025	9.4414	14.8922	15.0077	32.2313	15.8255	11.7881	39.1013	38.6135	22.9507	14.8049	10.2125	7.92372	10.008	13.2389	9.86644	54.1092	25.9149	24.674	9.80717	11.7291	18.7767	32.3047	14.0591	21.3621	18.8335	21.0125	22.3415	40.8887	35.9976
572	17.4134	13.3234	7.6764	17.2333	9.56437	10.018	9.45362	16.5384	9.70879	14.5185	9.50734	14.9932	15.1329	32.2065	15.831	11.7218	39.0559	38.554	23.0148	14.8628	10.2333	7.93496	10.0525	13.2905	9.87821	53.8815	25.9291	24.7616	9.84743	11.6144	18.8207	32.3121	14.1103	21.3545	18.8493	21.0312	22.2684	40.71	35.7933
573	17.3365	13.1599	7.67738	17.098	9.55823	10.039	9.44643	16.5378	9.71669	14.5288	9.5643	15.0966	15.2629	32.1852	15.8331	11.6381	38.9836	38.4623	23.0759	14.9256	10.2453	7.94017	10.0955	13.34	9.88704	53.6506	25.9376	24.8387	9.88369	11.4758	18.8562	32.3128	14.1605	21.346	18.855	21.0546	22.1897	40.5272	35.5818
574	17.2627	12.9961	7.67611	16.9477	9.55889	10.0551	9.44617	16.5367	9.72364	14.5388	9.623	15.2027	15.3887	32.1631	15.8286	11.5581	38.8935	38.3272	23.139	14.9794	10.2564	7.94736	10.1363	13.3862	9.89097	53.4183	25.9487	24.9104	9.91487	11.3382	18.8943	32.3122	14.2103	21.3365	18.8609	21.079	22.1346	40.3827	35.4226
575	17.2062	12.8576	7.67147	16.8059	9.56384	10.068	9.45244	16.5381	9.73109	14.5513	9.68545	15.3102	15.5111	32.1388	15.8204	11.4964	38.8029	38.1645	23.2013	15.025	10.272	7.95716	10.1754	13.432	9.89447	53.2035	25.9605	24.9788	9.94357	11.2268	18.9415	32.3107	14.2571	21.3256	18.8673	21.1025	22.1356	40.3271	35.3841
576	17.1747	12.7616	7.67022	16.7044	9.55871	10.0851	9.44982	16.5447	9.73873	14.5685	9.74736	15.4168	15.639	32.112	15.8169	11.4634	38.7365	38.0137	23.2532	15.0755	10.2956	7.96463	10.2145	13.4837	9.90815	53.0382	25.9625	25.044	9.97602	11.1678	19.0007	32.3044	14.2958	21.3123	18.8671	21.1294	22.1852	40.3374	35.4349
577	17.159	12.7087	7.66728	16.643	9.55778	10.103	9.44304	16.545	9.74819	14.5787	9.81379	15.5262	15.7714	32.0889	15.8189	11.4527	38.6998	37.9158	23.3106	15.1326	10.3162	7.96877	10.2579	13.5369	9.91489	52.9435	25.9729	25.1149	10.0056	11.1484	19.0659	32.3094	14.3405	21.3137	18.8713	21.1609	22.2539	40.3702	35.5174
578	17.1491	12.6711	7.66213	16.6053	9.55785	10.1176	9.43607	16.5413	9.75772	14.5841	9.88168	15.6362	15.9027	32.0705	15.8233	11.4501	38.6822	37.8749	23.3707	15.1898	10.3344	7.97546	10.2991	13.5861	9.91887	52.903	25.9852	25.1883	10.0335	11.1384	19.1282	32.3211	14.3876	21.3219	18.8821	21.1961	22.2914	40.361	35.5471
579	17.1332	12.6191	7.6555	16.5709	9.55212	10.1265	9.43189	16.5401	9.76419	14.591	9.94589	15.7439	16.0282	32.0547	15.8265	11.4408	38.6677	37.8751	23.4259	15.24	10.3545	7.99019	10.3302	13.6276	9.92912	52.8772	25.9874	25.2578	10.0622	11.11	19.1807	32.3297	14.4292	21.3231	18.898	21.2266	22.3041	40.3272	35.539
580	17.1215	12.5853	7.64705	16.5429	9.54801	10.1397	9.42288	16.5392	9.76175	14.6022	10.0027	15.8534	16.1609	32.0358	15.8313	11.4312	38.654	37.8782	23.4754	15.2959	10.377	7.99689	10.3628	13.6748	9.93852	52.7888	25.987	25.3254	10.0854	11.0992	19.2369	32.3375	14.4701	21.3275	18.9136	21.2531	22.2841	40.2617	35.4839
581	17.1263	12.5792	7.63924	16.5302	9.54178	10.1539	9.41759	16.5384	9.76315	14.611	10.0641	15.9655	16.2919	32.0157	15.8356	11.4364	38.6391	37.8759	23.5249	15.3513	10.4038	8.00171	10.4008	13.7298	9.94621	52.6353	25.984	25.3888	10.1122	11.1165	19.308	32.348	14.5053	21.329	18.927	21.2782	22.2219	40.1547	35.37
582	17.1543	12.6038	7.63414	16.5374	9.53244	10.1655	9.41959	16.5367	9.77436	14.6142	10.1346	16.0786	16.4176	31.9959	15.8376	11.4671	38.6249	37.8651	23.5765	15.4028	10.4379	8.00989	10.4425	13.7917	9.95278	52.4441	25.98	25.4458	10.1456	11.1682	19.4016	32.3641	14.5343	21.3233	18.936	21.2966	22.0893	39.9837	35.1599
583	17.2085	12.6583	7.633	16.5561	9.53026	10.1736	9.41523	16.5297	9.77868	14.6221	10.1943	16.185	16.5565	31.9737	15.8373	11.5238	38.6181	37.8451	23.6184	15.4593	10.4845	8.01685	10.4724	13.8552	9.96033	52.2774	25.9819	25.4947	10.1667	11.2656	19.5193	32.3878	14.5732	21.3147	18.9338	21.3142	22.006	39.8785	35.0296
584	17.2576	12.7242	7.63066	16.5897	9.52558	10.1845	9.40537	16.5279	9.77943	14.6281	10.2565	16.2952	16.6917	31.9487	15.8339	11.5799	38.6319	37.7999	23.6625	15.5212	10.536	8.02759	10.504	13.9193	9.97013	52.1918	25.9952	25.5455	10.1863	11.3612	19.6614	32.4168	14.6065	21.3033	18.9354	21.3396	22.0722	39.9458	35.1325
585	17.2983	12.7995	7.6257	16.6406	9.51662	10.1971	9.39484	16.5301	9.7809	14.6318	10.3234	16.4112	16.8194	31.9244	15.8288	11.6326	38.678	37.7407	23.711	15.5885	10.5903	8.04214	10.5398	13.9863	9.98336	52.2532	26.0238	25.6053	10.2101	11.4477	19.8188	32.4554	14.6338	21.2954	18.9441	21.3857	22.3575	40.2561	35.5908
586	17.3564	12.9003	7.62026	16.7111	9.50975	10.2018	9.39427	16.522	9.78968	14.6394	10.3845	16.5258	16.9485	31.9084	15.8261	11.7056	38.7682	37.7083	23.7559	15.6616	10.6512	8.05528	10.571	14.0631	10.0018	52.5513	26.0703	25.6796	10.2407	11.5607	19.9713	32.5155	14.6706	21.3043	18.9494	21.4425	22.6988	40.655	36.181
587	17.4211	13.0066	7.62149	16.7971	9.50363	10.2078	9.38535	16.5187	9.7938	14.6461	10.4494	16.6447	17.0785	31.8976	15.828	11.7799	38.89	37.7212	23.8023	15.7277	10.711	8.06696	10.6024	14.1334	10.0136	52.9436	26.1228	25.7602	10.2651	11.6771	20.1214	32.5784	14.7044	21.3323	18.9649	21.5006	22.9965	41.0345	36.7427
588	17.4783	13.1016	7.62639	16.8838	9.50011	10.2182	9.37721	16.5195	9.79387	14.6521	10.5178	16.7617	17.2116	31.8891	15.836	11.8463	39.0168	37.7711	23.8485	15.7893	10.7661	8.08044	10.6326	14.1979	10.0183	53.314	26.174	25.8428	10.2842	11.7825	20.2617	32.6363	14.7346	21.3684	18.987	21.5509	23.1893	41.3123	37.15
589	17.5155	13.1714	7.62823	16.953	9.5013	10.2335	9.38583	16.5181	9.79577	14.6594	10.5857	16.8682	17.3497	31.8801	15.8499	11.8999	39.1174	37.835	23.8909	15.8547	10.8143	8.09939	10.6592	14.2637	10.0209	53.5634	26.2187	25.9232	10.3048	11.8663	20.3834	32.686	14.7649	21.3971	19.006	21.6038	23.3288	41.5159	37.4666
590	17.547	13.225	7.63074	17.0077	9.50122	10.2493	9.37602	16.522	9.80526	14.6679	10.6503	16.9821	17.4822	31.8734	15.8565	11.9464	39.1913	37.8938	23.9364	15.9187	10.8567	8.11409	10.6928	14.3252	10.0308	53.7369	26.2572	25.9919	10.3336	11.9345	20.5004	32.7267	14.7968	21.4225	19.0275	21.6551	23.4487	41.6804	37.7382
591	17.576	13.2741	7.6333	17.0509	9.49955	10.2612	9.36467	16.5266	9.81555	14.6772	10.714	17.096	17.6105	31.8665	15.8598	11.9914	39.2491	37.9535	23.9812	15.9763	10.8967	8.12533	10.7269	14.3847	10.0415	53.8788	26.2909	26.0577	10.3638	11.9988	20.6099	32.7667	14.8278	21.4463	19.0481	21.699	23.569	41.8363	37.9976
592	17.6088	13.3287	7.63519	17.09	9.49731	10.2682	9.36686	16.5276	9.8209	14.6866	10.7788	17.2016	17.7375	31.8582	15.865	12.0387	39.3018	38.0203	24.0223	16.0265	10.9362	8.13637	10.7558	14.4448	10.0481	54.0235	26.3209	26.127	10.3893	12.0697	20.7101	32.8107	14.856	21.4694	19.0653	21.7349	23.6652	41.9699	38.2212
593	17.6521	13.3931	7.63776	17.1474	9.49672	10.2795	9.36271	16.5273	9.8263	14.6952	10.8423	17.3004	17.8651	31.8529	15.8721	12.0869	39.3549	38.0848	24.0652	16.0826	10.9694	8.15329	10.7841	14.5047	10.0617	54.1736	26.3443	26.1873	10.415	12.1524	20.8111	32.8464	14.882	21.491	19.0853	21.7771	23.7394	42.0765	38.4075
594	17.6941	13.4627	7.63711	17.209	9.49583	10.2911	9.36041	16.5262	9.83142	14.706	10.9005	17.4007	17.9805	31.8491	15.8782	12.1398	39.4024	38.1437	24.1112	16.1382	11.0023	8.16841	10.8094	14.5618	10.0758	54.2994	26.369	26.245	10.4358	12.2372	20.9088	32.8788	14.9108	21.5111	19.1059	21.8308	23.8004	42.1614	38.5655
595	17.7302	13.5295	7.63392	17.2648	9.49317	10.2997	9.36143	16.5257	9.83539	14.7169	10.9547	17.5039	18.0845	31.8441	15.8819	12.1941	39.4423	38.1951	24.1563	16.1907	11.0366	8.17942	10.8319	14.6166	10.0875	54.3876	26.3946	26.3007	10.4507	12.3157	21.0016	32.9096	14.9413	21.5284	19.1243	21.8876	23.8649	42.2431	38.7151
596	17.7641	13.5794	7.63631	17.3104	9.48738	10.3024	9.3564	16.5295	9.8357	14.7181	11.0147	17.6025	18.1999	31.8331	15.8835	12.2357	39.4782	38.2389	24.1882	16.243	11.0688	8.19172	10.8558	14.6742	10.0992	54.4437	26.407	26.3444	10.4652	12.3799	21.0913	32.9349	14.962	21.5389	19.1363	21.9384	23.9512	42.3523	38.9134
597	17.795	13.6272	7.63555	17.3422	9.48434	10.3048	9.35541	16.5296	9.84412	14.7231	11.0706	17.6949	18.3085	31.8212	15.8843	12.2741	39.5074	38.266	24.2228	16.2911	11.0989	8.20504	10.8817	14.727	10.1117	54.5031	26.4184	26.3889	10.4852	12.4434	21.1814	32.9582	14.9859	21.5481	19.147	21.9843	24.0596	42.495	39.1715
598	17.821	13.6705	7.63085	17.3624	9.48149	10.3099	9.3561	16.5265	9.85382	14.7323	11.1215	17.7841	18.4118	31.8092	15.884	12.3097	39.5333	38.2835	24.26	16.3369	11.1262	8.21707	10.9089	14.7784	10.1244	54.5834	26.431	26.4345	10.508	12.5006	21.2685	32.9815	15.0112	21.5556	19.1583	22.031	24.1787	42.6599	39.4704
599	17.8398	13.6993	7.62544	17.3769	9.47241	10.3189	9.35046	16.525	9.84961	14.7397	11.1704	17.8754	18.5186	31.7965	15.882	12.3389	39.5617	38.3062	24.292	16.3851	11.15	8.22431	10.9351	14.836	10.1358	54.6902	26.4422	26.4755	10.5258	12.5379	21.3461	33.0055	15.0296	21.5584	19.1701	22.0702	24.2999	42.8127	39.7593
600	17.8527	13.7232	7.62393	17.3939	9.46424	10.3197	9.3435	16.5228	9.85191	14.7495	11.2142	17.9594	18.6225	31.7881	15.8819	12.3582	39.5862	38.3184	24.328	16.4344	11.1746	8.22934	10.9601	14.8812	10.1401	54.8007	26.4563	26.5161	10.5432	12.5713	21.4247	33.024	15.0505	21.566	19.1794	22.1066	24.4085	42.9458	40.0187
601	17.8657	13.7502	7.627	17.4162	9.45816	10.323	9.33887	16.5198	9.86104	14.7589	11.2596	18.0369	18.7195	31.7843	15.8834	12.3768	39.6065	38.3256	24.3641	16.4867	11.2011	8.23943	10.9812	14.9215	10.1441	54.8988	26.4698	26.5552	10.562	12.6045	21.4972	33.0422	15.0702	21.5728	19.1878	22.1455	24.4942	43.0577	40.2398
602	17.8838	13.7837	7.63322	17.4416	9.4542	10.3365	9.33866	16.5172	9.87212	14.7654	11.3105	18.1109	18.8082	31.7834	15.8852	12.4026	39.6238	38.3367	24.3958	16.5407	11.2289	8.25746	10.9982	14.9658	10.1555	54.9748	26.4797	26.5916	10.5813	12.6388	21.5576	33.0646	15.0863	21.5727	19.1968	22.184	24.5619	43.1476	40.4205
603	17.9009	13.8126	7.63815	17.4537	9.45354	10.3342	9.33969	16.5198	9.8778	14.7734	11.3556	18.1857	18.8981	31.7799	15.8853	12.4275	39.6404	38.3581	24.4277	16.58	11.2555	8.26562	11.0207	15.0054	10.1745	55.0346	26.4917	26.6277	10.5901	12.6768	21.6225	33.0832	15.1141	21.5712	19.1998	22.2227	24.624	43.2222	40.5756
604	17.9154	13.8381	7.63923	17.4631	9.45025	10.3338	9.34278	16.5261	9.88029	14.7813	11.3994	18.2628	18.9869	31.7735	15.8846	12.4541	39.6547	38.3754	24.4635	16.6193	11.2837	8.27184	11.0466	15.0467	10.1939	55.094	26.5054	26.6658	10.6074	12.7145	21.6845	33.097	15.1381	21.5745	19.2047	22.2622	24.6848	43.2871	40.714
605	17.9273	13.8613	7.63633	17.4745	9.44421	10.3414	9.34514	16.5323	9.8823	14.7873	11.4433	18.34	19.0733	31.7648	15.8842	12.4825	39.6668	38.3815	24.5015	16.6639	11.3129	8.2798	11.0712	15.0919	10.2073	55.1571	26.5211	26.7057	10.6365	12.7492	21.7413	33.1078	15.1528	21.5826	19.2154	22.3036	24.738	43.3455	40.8375
606	17.9377	13.8828	7.63323	17.4805	9.44725	10.3398	9.33658	16.5304	9.88844	14.7901	11.4814	18.4077	19.1594	31.7562	15.8859	12.5082	39.6804	38.3821	24.5292	16.7018	11.3354	8.2838	11.0832	15.1356	10.2068	55.2084	26.5424	26.7441	10.6519	12.7796	21.8002	33.1225	15.172	21.5838	19.2299	22.3418	24.7862	43.4017	40.954
607	17.95	13.9026	7.6303	17.4876	9.44414	10.3377	9.32273	16.5274	9.88624	14.7923	11.5186	18.4713	19.2358	31.7482	15.8837	12.5294	39.6898	38.3801	24.5591	16.7403	11.3577	8.29077	11.0977	15.1762	10.2123	55.2434	26.5562	26.7769	10.6639	12.8081	21.8603	33.1359	15.1849	21.5876	19.2371	22.3781	24.8339	43.4576	41.0691
608	17.9604	13.9216	7.62659	17.4958	9.4368	10.3365	9.30786	16.5251	9.87931	14.7966	11.5552	18.5325	19.3058	31.7398	15.8806	12.5481	39.6972	38.3796	24.59	16.7745	11.3789	8.29903	11.1141	15.2134	10.2203	55.2666	26.5652	26.8065	10.6764	12.836	21.9163	33.148	15.1961	21.5926	19.2403	22.4157	24.8858	43.5129	41.1859
609	17.9672	13.941	7.62043	17.5016	9.43643	10.3344	9.2963	16.5221	9.88043	14.8057	11.5897	18.5925	19.3807	31.7287	15.8845	12.5686	39.7092	38.3849	24.6141	16.7949	11.3953	8.30246	11.1234	15.2491	10.2146	55.2896	26.5809	26.8393	10.6911	12.8642	21.9607	33.1615	15.2184	21.5918	19.2517	22.4511	24.938	43.5618	41.2942
610	17.977	13.9601	7.61947	17.5071	9.43486	10.335	9.29338	16.522	9.88203	14.8149	11.6221	18.6459	19.4522	31.715	15.883	12.5877	39.7172	38.3924	24.6427	16.8287	11.4147	8.31015	11.1392	15.2918	10.2231	55.3112	26.5918	26.87	10.7076	12.8893	22.0009	33.1718	15.2375	21.5979	19.2599	22.4854	24.9881	43.6072	41.395
611	17.9888	13.9792	7.62243	17.5131	9.43226	10.3359	9.29742	16.5228	9.88773	14.8235	11.6587	18.7003	19.5231	31.7037	15.8791	12.6044	39.7221	38.4013	24.6734	16.8713	11.434	8.32195	11.1575	15.3342	10.2397	55.3293	26.6006	26.8995	10.7254	12.9138	22.0438	33.1829	15.2531	21.6033	19.2663	22.5199	25.0352	43.6519	41.4913
612	17.9993	13.9978	7.62623	17.5189	9.42997	10.3354	9.30348	16.522	9.89952	14.8321	11.7018	18.7625	19.5966	31.6978	15.8775	12.619	39.727	38.4108	24.7023	16.9108	11.4497	8.3347	11.1727	15.3688	10.2525	55.3432	26.6123	26.9293	10.7438	12.9401	22.0925	33.1984	15.2688	21.6005	19.2741	22.5534	25.082	43.6957	41.5867
613	18.0073	14.0108	7.63078	17.5173	9.42599	10.3435	9.30142	16.5216	9.90085	14.8406	11.7311	18.8212	19.6687	31.6865	15.873	12.6352	39.7327	38.4146	24.7352	16.9399	11.4659	8.34221	11.1923	15.4061	10.2615	55.3635	26.6261	26.9523	10.7605	12.9611	22.1335	33.2091	15.2894	21.6035	19.2832	22.586	25.1277	43.7353	41.6756
614	18.0127	14.0249	7.6364	17.5183	9.42175	10.3524	9.29882	16.5199	9.89965	14.8482	11.7608	18.8767	19.739	31.6722	15.8691	12.6497	39.7362	38.4212	24.7692	16.9701	11.487	8.34888	11.2104	15.4403	10.2686	55.3831	26.6389	26.9819	10.7794	12.9834	22.171	33.2207	15.3078	21.6064	19.292	22.6177	25.1723	43.7709	41.7586
615	18.0169	14.0417	7.64195	17.5246	9.4177	10.357	9.29856	16.5157	9.9018	14.854	11.7978	18.93	19.8063	31.6579	15.8668	12.6609	39.7366	38.4325	24.801	17.007	11.511	8.35666	11.2239	15.4705	10.2752	55.3979	26.6492	27.0199	10.8002	13.0081	22.2081	33.2341	15.3223	21.6055	19.299	22.649	25.2167	43.8065	41.8419
616	18.019	14.0497	7.64337	17.5225	9.41204	10.3569	9.29185	16.5084	9.90796	14.8575	11.8327	18.981	19.8655	31.6469	15.8615	12.6704	39.7385	38.4375	24.8258	17.0451	11.5229	8.36159	11.2351	15.5051	10.2807	55.4118	26.6596	27.0451	10.8153	13.0242	22.244	33.238	15.344	21.6024	19.3009	22.6792	25.2591	43.8421	41.9222
617	18.0227	14.0585	7.63977	17.5207	9.40646	10.3557	9.29029	16.5069	9.91238	14.8615	11.8582	19.0303	19.9227	31.6398	15.8524	12.6833	39.74	38.4306	24.8502	17.0728	11.5383	8.36601	11.2473	15.5429	10.2838	55.4157	26.6633	27.0693	10.8272	13.0393	22.2792	33.2434	15.3578	21.5994	19.305	22.7077	25.3007	43.8746	41.9978
618	18.0263	14.0694	7.63513	17.5207	9.4013	10.3539	9.2911	16.5088	9.91366	14.8671	11.8778	19.0765	19.9805	31.6331	15.8435	12.6979	39.7423	38.4178	24.8762	17.0972	11.5576	8.37152	11.2612	15.5803	10.2853	55.4113	26.6643	27.094	10.8393	13.0552	22.3141	33.2508	15.3675	21.5978	19.3122	22.7339	25.3427	43.9006	42.067
619	18.0247	14.0796	7.63674	17.5196	9.39618	10.3498	9.28226	16.505	9.91324	14.8748	11.9025	19.1174	20.0402	31.6204	15.8421	12.7077	39.7477	38.4143	24.9033	17.1373	11.5715	8.37943	11.2764	15.6123	10.2879	55.4069	26.6732	27.1154	10.8556	13.0704	22.3495	33.2547	15.3889	21.598	19.3189	22.7563	25.3767	43.9228	42.1246
620	18.0251	14.0886	7.62775	17.5136	9.39319	10.3404	9.26978	16.502	9.91193	14.8751	11.9255	19.1546	20.0882	31.6064	15.8375	12.7174	39.7438	38.4101	24.9293	17.1618	11.5831	8.3868	11.2908	15.6432	10.2964	55.3979	26.6716	27.134	10.8605	13.0783	22.3839	33.2527	15.4074	21.5945	19.3248	22.7783	25.4082	43.9402	42.1702
621	18.0239	14.0947	7.61535	17.5035	9.39161	10.3308	9.26105	16.5024	9.90984	14.8774	11.9505	19.1928	20.1359	31.5941	15.8323	12.7289	39.7384	38.4019	24.955	17.1817	11.5968	8.3943	11.3056	15.6804	10.3092	55.3864	26.671	27.1557	10.8634	13.0843	22.4199	33.2501	15.4233	21.5882	19.332	22.801	25.4427	43.9537	42.2096
622	18.0178	14.0964	7.60958	17.492	9.38914	10.3261	9.26014	16.5059	9.90706	14.8903	11.9807	19.2355	20.1955	31.5846	15.8301	12.7417	39.7411	38.3887	24.9816	17.2135	11.6154	8.40274	11.3219	15.7265	10.3205	55.376	26.6837	27.1852	10.877	13.0944	22.459	33.2515	15.4393	21.581	19.3421	22.8203	25.484	43.9711	42.2616
623	18.0128	14.0938	7.59813	17.4812	9.37928	10.3186	9.24963	16.4995	9.90536	14.8908	12.0016	19.2711	20.2453	31.571	15.822	12.7466	39.7387	38.3756	25.0084	17.237	11.6316	8.4081	11.3328	15.7559	10.3146	55.3643	26.6834	27.2127	10.8919	13.0995	22.4899	33.2468	15.4501	21.5718	19.3488	22.8401	25.5242	43.994	42.3227
624	18.0073	14.0937	7.58594	17.4722	9.36801	10.306	9.23302	16.4925	9.90198	14.8921	12.0132	19.3041	20.2894	31.5572	15.8112	12.7497	39.7339	38.3618	25.0334	17.2642	11.6428	8.41056	11.3394	15.7803	10.3079	55.3527	26.6798	27.2315	10.9042	13.1015	22.515	33.2434	15.4601	21.5618	19.3508	22.8603	25.5619	44.022	42.3881
625	18.0014	14.0989	7.57731	17.4647	9.35991	10.2913	9.21718	16.4903	9.89664	14.8986	12.0223	19.3376	20.3341	31.5452	15.8006	12.7561	39.7293	38.3488	25.0561	17.3009	11.6516	8.41175	11.3451	15.8082	10.312	55.3448	26.6804	27.2435	10.9123	13.1044	22.5384	33.2445	15.4714	21.5531	19.3494	22.8781	25.6006	44.0522	42.4506
626	17.9964	14.1024	7.57248	17.455	9.35504	10.2875	9.2132	16.4871	9.89441	14.8895	12.0473	19.3703	20.3861	31.5305	15.7907	12.7666	39.7244	38.3443	25.0781	17.3361	11.6714	8.41511	11.3567	15.8342	10.326	55.3492	26.6822	27.2663	10.9174	13.1154	22.5655	33.243	15.4794	21.5511	19.3493	22.8985	25.6478	44.0853	42.526
627	17.9987	14.114	7.57327	17.4491	9.35268	10.2867	9.20923	16.4842	9.89713	14.8929	12.0711	19.4069	20.4377	31.5178	15.7839	12.7816	39.7222	38.3416	25.1034	17.3653	11.6901	8.4233	11.367	15.8653	10.3361	55.3534	26.689	27.2948	10.9315	13.1317	22.5945	33.2447	15.4943	21.549	19.353	22.9192	25.6984	44.1233	42.6085
628	18.0059	14.1337	7.57706	17.448	9.35094	10.2861	9.20537	16.482	9.90234	14.9059	12.0917	19.4468	20.4852	31.5067	15.7779	12.7996	39.7221	38.3404	25.1317	17.3924	11.7059	8.43375	11.3777	15.8994	10.3416	55.3555	26.6996	27.3243	10.9542	13.1521	22.626	33.2488	15.5143	21.5466	19.3608	22.9368	25.7456	44.1669	42.6873
629	18.0078	14.1541	7.57764	17.4492	9.34689	10.2866	9.2102	16.4801	9.9039	14.9036	12.1169	19.4852	20.5276	31.4928	15.7678	12.8169	39.7213	38.3453	25.1587	17.4291	11.7237	8.43953	11.3964	15.9279	10.352	55.3612	26.7087	27.3491	10.9752	13.1754	22.6616	33.2496	15.5279	21.5483	19.3713	22.9552	25.7942	44.2091	42.7615
630	18.0127	14.1707	7.57708	17.4475	9.34511	10.2855	9.21058	16.4779	9.90708	14.9065	12.1351	19.5165	20.5765	31.4788	15.7584	12.8333	39.7216	38.3513	25.1844	17.4596	11.738	8.44474	11.4067	15.9548	10.3604	55.3664	26.717	27.3762	10.985	13.1989	22.69	33.251	15.5399	21.5453	19.3782	22.9755	25.8439	44.2492	42.8306
631	18.0151	14.1835	7.57507	17.4448	9.34319	10.283	9.20462	16.4748	9.90883	14.9117	12.1527	19.545	20.6251	31.4649	15.7494	12.8471	39.7221	38.3588	25.2091	17.4845	11.7523	8.45053	11.4123	15.9799	10.3676	55.3701	26.7247	27.4023	10.9919	13.2179	22.7143	33.2521	15.5532	21.5421	19.3817	22.996	25.8926	44.2867	42.8948
632	18.012	14.1948	7.57134	17.4446	9.33817	10.2794	9.19536	16.4709	9.90558	14.9129	12.1778	19.5769	20.6642	31.4513	15.7394	12.8577	39.7213	38.3683	25.2336	17.5093	11.7703	8.45714	11.4214	16.0035	10.3753	55.3727	26.7322	27.4233	11.0068	13.2299	22.741	33.2516	15.5697	21.5448	19.3851	23.0107	25.9359	44.3196	42.9536
633	18.0145	14.2076	7.56846	17.4446	9.33679	10.2733	9.19425	16.4702	9.90355	14.9215	12.1947	19.6087	20.7073	31.4403	15.7312	12.8738	39.7221	38.3703	25.2595	17.5427	11.7822	8.46354	11.4303	16.0358	10.3768	55.3783	26.7389	27.4501	11.0174	13.2477	22.7699	33.2544	15.5849	21.5436	19.3964	23.0265	25.9775	44.3503	43.0105
634	18.0188	14.2215	7.56636	17.4465	9.33586	10.2683	9.19606	16.4678	9.90806	14.9296	12.2101	19.6379	20.7539	31.4293	15.7235	12.8901	39.7243	38.3711	25.2885	17.5757	11.7947	8.46921	11.4426	16.0684	10.3783	55.3804	26.7447	27.477	11.031	13.2677	22.8006	33.2584	15.601	21.5438	19.41	23.0438	26.0192	44.3799	43.068
635	18.0207	14.236	7.56442	17.4497	9.33331	10.2658	9.19457	16.4625	9.91769	14.9329	12.2288	19.6652	20.8008	31.4168	15.716	12.9034	39.7271	38.3755	25.3203	17.6035	11.8119	8.47521	11.4587	16.0973	10.3845	55.3771	26.7503	27.5012	11.0499	13.2869	22.832	33.2613	15.6198	21.5464	19.4209	23.0592	26.0619	44.4087	43.1277
636	18.0218	14.252	7.56122	17.4481	9.33141	10.2613	9.1837	16.4632	9.91533	14.9379	12.2465	19.6986	20.8421	31.4029	15.7123	12.9196	39.7301	38.3821	25.3501	17.6348	11.8295	8.48691	11.4696	16.1342	10.395	55.3782	26.7581	27.5319	11.0609	13.3076	22.8628	33.2626	15.6408	21.5381	19.4276	23.0696	26.1017	44.4379	43.1776
637	18.0235	14.2666	7.55927	17.4472	9.33041	10.2563	9.17244	16.4653	9.91275	14.9427	12.2659	19.7288	20.8828	31.3894	15.7064	12.9355	39.7307	38.3846	25.3789	17.6624	11.8469	8.4971	11.4827	16.1663	10.4021	55.3801	26.7625	27.5602	11.0761	13.3253	22.897	33.2616	15.6625	21.5341	19.4374	23.078	26.1394	44.4647	43.2268
638	18.0264	14.2804	7.55795	17.4475	9.32882	10.2516	9.16478	16.4662	9.91347	14.9471	12.2851	19.7553	20.9249	31.3766	15.6979	12.9512	39.7306	38.3816	25.4075	17.6896	11.8645	8.50456	11.4977	16.1931	10.4047	55.3802	26.7642	27.5839	11.095	13.342	22.9322	33.2588	15.6809	21.5347	19.4501	23.0872	26.1769	44.4869	43.2844
639	18.0301	14.2962	7.55394	17.4451	9.32346	10.2468	9.16109	16.4648	9.91495	14.9523	12.2985	19.7849	20.9677	31.3638	15.6912	12.9686	39.7353	38.3764	25.4369	17.7281	11.8836	8.51286	11.5084	16.2241	10.4075	55.3755	26.7703	27.605	11.1071	13.3654	22.9601	33.256	15.6892	21.528	19.4596	23.0935	26.214	44.5082	43.3404
640	18.0289	14.3106	7.55018	17.4417	9.32074	10.2421	9.15985	16.4617	9.91874	14.9553	12.3135	19.8126	21.0073	31.3511	15.6849	12.9836	39.7355	38.3722	25.4655	17.7603	11.8979	8.51942	11.522	16.2543	10.4137	55.3732	26.7727	27.6321	11.1216	13.3833	22.9921	33.2506	15.7057	21.5215	19.4679	23.0967	26.249	44.5275	43.394
641	18.0277	14.3215	7.54604	17.4378	9.3168	10.2371	9.15582	16.4586	9.91973	14.9591	12.3293	19.8393	21.0453	31.3385	15.6784	12.9974	39.7336	38.37	25.4947	17.7906	11.9113	8.52508	11.5367	16.2817	10.4224	55.3728	26.7718	27.6593	11.1344	13.3991	23.0256	33.2449	15.7281	21.5134	19.4755	23.0992	26.2828	44.5464	43.4469
642	18.031	14.329	7.54019	17.4336	9.30664	10.2314	9.14507	16.4569	9.91356	14.9668	12.3431	19.867	21.085	31.3255	15.6708	13.0125	39.7343	38.3691	25.526	17.8277	11.9296	8.53124	11.5488	16.3062	10.4308	55.3714	26.7706	27.6778	11.1406	13.419	23.0555	33.2421	15.7478	21.5008	19.4824	23.107	26.3198	44.5703	43.504
643	18.032	14.3422	7.5339	17.4314	9.30054	10.2278	9.14174	16.4518	9.91518	14.971	12.358	19.8943	21.1263	31.3117	15.6591	13.0259	39.7326	38.3627	25.5519	17.8598	11.9476	8.53605	11.5595	16.3334	10.4359	55.3649	26.7685	27.6994	11.1573	13.4366	23.0861	33.239	15.7612	21.4927	19.4876	23.1164	26.3631	44.5969	43.5597
644	18.0319	14.3564	7.52925	17.4288	9.29555	10.222	9.13747	16.4484	9.91796	14.9732	12.3739	19.9228	21.1662	31.2995	15.6489	13.0392	39.7296	38.3544	25.5796	17.8906	11.9651	8.54062	11.5694	16.3608	10.4394	55.3591	26.7673	27.7249	11.1755	13.4533	23.1171	33.2349	15.7732	21.4839	19.492	23.1254	26.4097	44.625	43.6143
645	18.0333	14.3678	7.52664	17.4243	9.28914	10.2125	9.12766	16.4483	9.91708	14.9757	12.3893	19.9528	21.2039	31.2898	15.6428	13.0535	39.7256	38.3474	25.6126	17.9236	11.9819	8.54629	11.5805	16.3868	10.4432	55.3567	26.7677	27.7525	11.1886	13.4711	23.1486	33.23	15.7884	21.4713	19.4972	23.1334	26.4532	44.6538	43.6703
646	18.0332	14.3784	7.52199	17.4195	9.2835	10.2065	9.12232	16.4424	9.91767	14.9785	12.3993	19.9799	21.2437	31.2774	15.6328	13.0666	39.7172	38.339	25.6417	17.9583	11.9969	8.55462	11.6016	16.4137	10.449	55.3508	26.7673	27.7761	11.2035	13.4904	23.184	33.225	15.8088	21.4604	19.5074	23.1451	26.4962	44.6866	43.725
647	18.0334	14.389	7.5182	17.4155	9.27623	10.2023	9.12072	16.4391	9.91922	14.9859	12.4155	20.0108	21.2861	31.2659	15.6239	13.0798	39.7139	38.3374	25.6739	17.9919	12.0141	8.56159	11.6167	16.442	10.4576	55.3442	26.7644	27.8011	11.2216	13.5087	23.2175	33.2233	15.8291	21.4494	19.5149	23.1553	26.5407	44.7189	43.7786
648	18.0343	14.4001	7.51585	17.4127	9.26843	10.199	9.11874	16.4385	9.921	14.9954	12.4379	20.0444	21.3296	31.2547	15.6166	13.0932	39.7144	38.3403	25.7087	18.025	12.0335	8.56866	11.6251	16.4709	10.4671	55.3378	26.7614	27.8286	11.2417	13.527	23.2487	33.2237	15.8489	21.4371	19.5205	23.1606	26.5873	44.7476	43.8313
649	18.0373	14.4112	7.51354	17.4107	9.26464	10.1964	9.10832	16.4334	9.92189	14.9978	12.4559	20.0723	21.3704	31.2401	15.6082	13.1056	39.7073	38.3356	25.739	18.0614	12.0516	8.58267	11.6394	16.4982	10.473	55.3307	26.7652	27.8557	11.259	13.5485	23.2826	33.2212	15.8715	21.4227	19.5326	23.1692	26.6334	44.7782	43.88
650	18.0398	14.4234	7.51351	17.4085	9.2586	10.193	9.10097	16.4297	9.92157	15.0047	12.4732	20.1046	21.4125	31.2309	15.5998	13.1198	39.7026	38.3278	25.7711	18.0937	12.0689	8.5913	11.6518	16.5275	10.4747	55.322	26.7684	27.8841	11.2769	13.5689	23.3187	33.2204	15.8902	21.4116	19.538	23.1767	26.6746	44.8073	43.9301
651	18.0411	14.4342	7.51289	17.4051	9.25277	10.1894	9.09697	16.4274	9.92311	15.0119	12.4906	20.14	21.4552	31.2222	15.5915	13.1357	39.7001	38.3225	25.8056	18.1238	12.0864	8.59673	11.6651	16.5583	10.4788	55.3132	26.7716	27.9118	11.2948	13.588	23.355	33.2211	15.9077	21.4023	19.5413	23.1817	26.7131	44.8351	43.9829
652	18.0404	14.4408	7.5085	17.4006	9.25124	10.1869	9.09359	16.4248	9.92928	15.0126	12.5084	20.1737	21.4963	31.2064	15.5837	13.1519	39.6967	38.3243	25.8413	18.1563	12.1054	8.60538	11.6839	16.5891	10.4916	55.3063	26.7767	27.9367	11.3117	13.6071	23.3895	33.2212	15.9294	21.3917	19.5518	23.1861	26.7591	44.8658	44.0348
653	18.046	14.4506	7.50788	17.4	9.24763	10.1873	9.09453	16.4226	9.93127	15.0212	12.5283	20.2058	21.5364	31.1967	15.5802	13.1662	39.6938	38.3247	25.8768	18.1902	12.1281	8.61625	11.6995	16.622	10.4974	55.2998	26.7801	27.9683	11.3316	13.625	23.4252	33.2193	15.9559	21.3843	19.5616	23.1952	26.8	44.8939	44.0865
654	18.0506	14.4594	7.51049	17.3991	9.24597	10.1869	9.09509	16.4214	9.9335	15.0283	12.5497	20.2363	21.5779	31.187	15.5762	13.1796	39.6923	38.3211	25.9113	18.2255	12.15	8.62649	11.7138	16.6524	10.4995	55.2941	26.784	27.9997	11.3539	13.6446	23.4604	33.2194	15.9813	21.3763	19.5707	23.2051	26.8385	44.9215	44.1371
655	18.052	14.4652	7.51382	17.396	9.24794	10.1838	9.09222	16.4214	9.93853	15.0294	12.5715	20.2663	21.6226	31.1735	15.5688	13.1936	39.6922	38.3146	25.9452	18.2615	12.1688	8.63507	11.7299	16.6792	10.5039	55.2901	26.7899	28.0267	11.3776	13.6669	23.4945	33.2231	16.0026	21.3664	19.5797	23.2097	26.8806	44.952	44.186
656	18.0577	14.4741	7.51206	17.3968	9.24632	10.1817	9.08863	16.4203	9.93984	15.0393	12.5912	20.3004	21.6717	31.1639	15.5614	13.2097	39.6919	38.3145	25.9813	18.2946	12.1893	8.64614	11.7494	16.7138	10.518	55.2894	26.7962	28.0571	11.4027	13.6869	23.5313	33.2235	16.0234	21.3618	19.5878	23.2114	26.9143	44.9787	44.2348
657	18.0617	14.4824	7.51427	17.3959	9.24407	10.1825	9.08662	16.42	9.94518	15.0477	12.6091	20.3337	21.7175	31.155	15.557	13.2271	39.6901	38.3162	26.0163	18.3257	12.2111	8.65952	11.7679	16.7446	10.5286	55.2843	26.8023	28.0887	11.4226	13.7094	23.5711	33.2234	16.046	21.357	19.5972	23.2122	26.9494	45.0008	44.286
658	18.0655	14.4886	7.51957	17.3929	9.24248	10.1854	9.08697	16.4211	9.95289	15.053	12.6285	20.366	21.76	31.1458	15.5542	13.2445	39.6883	38.3174	26.0507	18.3587	12.2341	8.67294	11.7842	16.7706	10.5334	55.2747	26.8073	28.1207	11.4382	13.7339	23.6119	33.2248	16.0709	21.3499	19.6077	23.2127	26.9901	45.0195	44.3386
659	18.0681	14.4935	7.51792	17.3922	9.24155	10.1874	9.08913	16.4232	9.95243	15.0617	12.6566	20.4011	21.8058	31.1365	15.5475	13.2603	39.6906	38.3179	26.0884	18.4003	12.2581	8.68188	11.8009	16.8001	10.5401	55.2675	26.809	28.1536	11.4572	13.7546	23.6482	33.2289	16.0974	21.3415	19.6176	23.2109	27.0237	45.0379	44.3824
660	18.0726	14.4964	7.51786	17.3918	9.24175	10.1882	9.09108	16.4231	9.95821	15.0705	12.6747	20.4353	21.8526	31.126	15.542	13.2739	39.6917	38.3178	26.1244	18.4393	12.2798	8.6909	11.8188	16.8343	10.547	55.2644	26.8147	28.1815	11.4821	13.7772	23.685	33.2291	16.121	21.3329	19.6251	23.2079	27.0555	45.0624	44.4308
661	18.0767	14.4992	7.51905	17.3911	9.24074	10.1872	9.0889	16.4219	9.96534	15.0774	12.6905	20.4691	21.8995	31.1161	15.5366	13.2876	39.6901	38.3186	26.1586	18.4738	12.2993	8.70091	11.8393	16.8692	10.5549	55.2604	26.8199	28.2084	11.5069	13.7988	23.7221	33.226	16.1427	21.3235	19.6316	23.2042	27.0892	45.089	44.484
662	18.0787	14.5042	7.51874	17.3891	9.23643	10.1847	9.08004	16.4223	9.96514	15.081	12.7163	20.5037	21.9461	31.1089	15.5293	13.3042	39.6865	38.3212	26.1927	18.5063	12.3185	8.71182	11.8628	16.8998	10.5646	55.249	26.8179	28.2402	11.5248	13.8159	23.7588	33.2225	16.1652	21.3123	19.6388	23.2004	27.1275	45.1052	44.5335
663	18.0839	14.5088	7.5173	17.3852	9.23606	10.1839	9.07571	16.4228	9.9691	15.0889	12.7313	20.5365	21.9893	31.0973	15.5247	13.3194	39.6871	38.3157	26.2274	18.5416	12.3401	8.72498	11.8809	16.9304	10.5727	55.2359	26.818	28.2715	11.5465	13.8367	23.7975	33.2219	16.1902	21.3033	19.6449	23.1965	27.1598	45.1225	44.5828
664	18.0885	14.5117	7.51464	17.381	9.23416	10.181	9.07277	16.422	9.97461	15.0935	12.7475	20.566	22.0328	31.084	15.5205	13.3324	39.6866	38.3115	26.2613	18.5771	12.3614	8.73478	11.8966	16.9586	10.5775	55.2237	26.816	28.3016	11.5646	13.8574	23.8358	33.2191	16.2145	21.2927	19.6503	23.1917	27.1904	45.1432	44.6311
665	18.0879	14.5127	7.51055	17.3772	9.22825	10.1747	9.06902	16.4193	9.9784	15.0919	12.7713	20.5939	22.0791	31.072	15.5145	13.3438	39.6823	38.313	26.2943	18.6112	12.3807	8.73935	11.9134	16.984	10.5803	55.2122	26.8105	28.331	11.5767	13.8751	23.8712	33.2123	16.2367	21.2783	19.6558	23.1858	27.2259	45.1657	44.6773
666	18.0865	14.5117	7.50426	17.3717	9.2266	10.1734	9.06989	16.416	9.97921	15.0964	12.7881	20.6284	22.1262	31.0626	15.5075	13.3576	39.6797	38.3079	26.3291	18.6463	12.4004	8.74742	11.9326	17.0152	10.5898	55.1948	26.8112	28.3627	11.5976	13.8933	23.9031	33.2105	16.2598	21.2641	19.6621	23.1833	27.2619	45.182	44.724
667	18.0852	14.5086	7.49824	17.3648	9.22498	10.1704	9.06489	16.415	9.9771	15.0973	12.8032	20.6616	22.1701	31.0519	15.501	13.3652	39.6765	38.3049	26.3622	18.6771	12.4197	8.75614	11.95	17.044	10.5983	55.175	26.809	28.3904	11.6176	13.9062	23.9364	33.2061	16.2831	21.2517	19.6661	23.1796	27.2958	45.1969	44.7653
668	18.0819	14.5014	7.4931	17.3551	9.22157	10.1645	9.05461	16.4149	9.97558	15.095	12.819	20.6924	22.2126	31.0388	15.4943	13.3682	39.6718	38.3035	26.3939	18.7053	12.4387	8.76468	11.9656	17.0696	10.6037	55.154	26.804	28.4149	11.6354	13.9143	23.9715	33.1988	16.3058	21.2408	19.6676	23.1737	27.3256	45.2107	44.7964
669	18.0759	14.4865	7.48796	17.3399	9.21635	10.1596	9.04952	16.4103	9.98173	15.0989	12.8361	20.7263	22.2608	31.0241	15.4849	13.3772	39.6658	38.2954	26.4282	18.7388	12.4583	8.77381	11.9831	17.0968	10.6079	55.131	26.8038	28.444	11.6568	13.9235	24.0052	33.1942	16.3275	21.2282	19.6693	23.1728	27.349	45.2143	44.815
670	18.0691	14.469	7.48283	17.3265	9.21287	10.1557	9.04443	16.4067	9.98467	15.1037	12.8539	20.7593	22.3079	31.0111	15.4755	13.3788	39.6592	38.2917	26.4609	18.7722	12.4747	8.77985	12.0023	17.1259	10.608	55.1037	26.8019	28.4747	11.674	13.9235	24.0354	33.1868	16.3498	21.2171	19.6711	23.1687	27.3745	45.2105	44.8163
671	18.0597	14.4492	7.47759	17.3126	9.21044	10.1515	9.03886	16.4042	9.98495	15.105	12.8709	20.792	22.3529	30.9997	15.4678	13.3768	39.6517	38.2898	26.4944	18.8045	12.4919	8.78606	12.0208	17.1563	10.6095	55.071	26.7984	28.5051	11.6904	13.9177	24.0628	33.1787	16.373	21.205	19.673	23.1624	27.4003	45.2028	44.806
672	18.0507	14.4267	7.47204	17.294	9.2072	10.1452	9.03381	16.4016	9.98631	15.1006	12.8864	20.8259	22.3972	30.9889	15.4625	13.3788	39.6429	38.2842	26.5319	18.8362	12.5148	8.79627	12.0363	17.1862	10.618	55.0337	26.7956	28.5338	11.712	13.9145	24.089	33.174	16.3972	21.1895	19.6749	23.1592	27.4189	45.1966	44.7979
673	18.0465	14.4081	7.46498	17.2756	9.20382	10.1375	9.03198	16.4012	9.98833	15.1012	12.9056	20.8575	22.4462	30.9758	15.457	13.3808	39.6342	38.2825	26.5669	18.868	12.5338	8.80163	12.0585	17.2137	10.6224	54.9991	26.795	28.5631	11.7385	13.9202	24.1123	33.1707	16.4228	21.1758	19.6775	23.1536	27.4475	45.2088	44.8284
674	18.0468	14.3982	7.4606	17.2606	9.20084	10.1336	9.03226	16.4002	9.99033	15.1039	12.9263	20.8914	22.4964	30.9627	15.4504	13.3885	39.6255	38.279	26.599	18.8993	12.5492	8.80795	12.0807	17.2405	10.6273	54.973	26.7956	28.5951	11.7622	13.9357	24.1335	33.1665	16.4466	21.166	19.6793	23.1467	27.4847	45.2322	44.8843
675	18.0503	14.3954	7.46034	17.2492	9.19913	10.1343	9.03197	16.3975	9.9922	15.1062	12.9462	20.9297	22.545	30.9518	15.4428	13.4026	39.6166	38.2706	26.6302	18.9314	12.564	8.81908	12.0993	17.2688	10.6353	54.9568	26.7964	28.6299	11.7804	13.9563	24.1539	33.1605	16.4685	21.1584	19.6801	23.1405	27.5227	45.2539	44.9387
676	18.048	14.385	7.45813	17.2354	9.20062	10.1273	9.02419	16.3958	9.99533	15.1106	12.964	20.967	22.5922	30.943	15.4372	13.4118	39.6077	38.2645	26.6675	18.9715	12.584	8.8317	12.122	17.2993	10.6383	54.9434	26.7971	28.6636	11.8026	13.9675	24.1754	33.155	16.4965	21.1433	19.6832	23.1349	27.547	45.2643	44.966
677	18.0373	14.3618	7.45507	17.2198	9.20192	10.1239	9.02316	16.3964	9.99876	15.1128	12.9841	21.0045	22.641	30.9323	15.4324	13.4122	39.5993	38.2593	26.708	19.0067	12.6068	8.84143	12.143	17.3313	10.645	54.9323	26.7982	28.6968	11.8245	13.9638	24.2025	33.1536	16.525	21.13	19.6862	23.1292	27.5543	45.2475	44.9335
678	18.024	14.334	7.45289	17.2051	9.20206	10.1254	9.02756	16.3981	10.0025	15.1133	13.0071	21.0432	22.6922	30.9202	15.4282	13.409	39.5928	38.2539	26.7476	19.0372	12.632	8.84904	12.1634	17.365	10.6553	54.92	26.8009	28.7308	11.8475	13.9538	24.2364	33.1559	16.5532	21.1204	19.6882	23.1225	27.5558	45.2174	44.8726
679	18.0187	14.3221	7.45414	17.1955	9.20201	10.1256	9.02312	16.3975	10.0075	15.1172	13.03	21.0838	22.745	30.9108	15.4246	13.4155	39.5904	38.2466	26.7807	19.0741	12.6606	8.8598	12.1898	17.4018	10.6616	54.9007	26.8077	28.7675	11.8778	13.9587	24.2754	33.1579	16.5843	21.1101	19.689	23.1141	27.5822	45.2279	44.9017
680	18.0285	14.3322	7.45535	17.1959	9.20486	10.1264	9.01941	16.3978	10.0136	15.119	13.0543	21.1266	22.7996	30.9026	15.4217	13.4358	39.5877	38.2391	26.8167	19.1084	12.6881	8.87242	12.2136	17.4383	10.6684	54.893	26.813	28.804	11.9045	13.9934	24.322	33.1616	16.6131	21.1014	19.6938	23.1053	27.6327	45.2908	45.0351
681	18.05	14.3602	7.4569	17.2028	9.20862	10.1283	9.01746	16.3999	10.0199	15.1212	13.0794	21.1694	22.8554	30.8944	15.4193	13.4678	39.5881	38.2341	26.8552	19.1426	12.7152	8.88481	12.2372	17.4749	10.676	54.897	26.8191	28.841	11.9284	14.0512	24.3742	33.1659	16.6417	21.0936	19.7001	23.0987	27.6958	45.3852	45.2276
682	18.0756	14.396	7.45991	17.2104	9.21032	10.1309	9.01611	16.4036	10.0253	15.1268	13.1037	21.2102	22.9112	30.8853	15.4172	13.5056	39.5954	38.2336	26.8936	19.1809	12.7443	8.89541	12.2653	17.513	10.6841	54.9067	26.8289	28.8807	11.9537	14.1165	24.4285	33.1691	16.6733	21.0859	19.7036	23.0965	27.7541	45.4726	45.4018
683	18.096	14.4212	7.46302	17.2191	9.21139	10.1297	9.01504	16.4063	10.0308	15.1294	13.1241	21.2517	22.964	30.8773	15.4147	13.5395	39.6012	38.2327	26.9335	19.2175	12.7718	8.90908	12.2905	17.5531	10.6918	54.9201	26.8335	28.9239	11.9836	14.175	24.4815	33.1721	16.7057	21.0801	19.7043	23.0903	27.8018	45.5381	45.5339
684	18.1094	14.4353	7.46541	17.2251	9.21364	10.1273	9.01423	16.4078	10.0383	15.1302	13.1467	21.2941	23.017	30.8717	15.4122	13.5671	39.6059	38.2357	26.9747	19.2528	12.8005	8.92099	12.3165	17.5917	10.7013	54.9347	26.8388	28.9661	12.0122	14.221	24.5335	33.1753	16.7387	21.0735	19.706	23.0837	27.8397	45.584	45.6267
685	18.1186	14.4411	7.4665	17.2275	9.21748	10.1264	9.01373	16.409	10.047	15.1313	13.1738	21.3371	23.0727	30.8677	15.4102	13.5883	39.6104	38.243	27.0162	19.2881	12.8313	8.92966	12.3462	17.6272	10.7128	54.9478	26.8472	29.005	12.0368	14.2543	24.584	33.1788	16.7713	21.0649	19.7106	23.0792	27.8708	45.6178	45.694
686	18.1257	14.4433	7.46574	17.2307	9.2204	10.1283	9.01376	16.4122	10.0517	15.1357	13.1979	21.3808	23.1305	30.8601	15.4087	13.604	39.6134	38.2435	27.057	19.3259	12.8603	8.94271	12.3798	17.6625	10.7219	54.9545	26.8499	29.0435	12.0621	14.2812	24.6292	33.1817	16.799	21.0558	19.7151	23.0714	27.8986	45.6493	45.7594
687	18.1321	14.4427	7.46473	17.2348	9.22203	10.1307	9.01347	16.4138	10.0564	15.1389	13.2201	21.4212	23.185	30.8542	15.4059	13.6227	39.6175	38.2472	27.0948	19.3649	12.887	8.95736	12.4085	17.7006	10.7268	54.9563	26.8546	29.0833	12.0898	14.3105	24.6704	33.1827	16.8285	21.0488	19.7201	23.0631	27.9277	45.6799	45.8271
688	18.1389	14.442	7.46411	17.2388	9.22316	10.1313	9.01267	16.4139	10.0618	15.141	13.2412	21.4595	23.2368	30.8489	15.4025	13.6446	39.622	38.2544	27.1323	19.4039	12.9125	8.97163	12.4327	17.7409	10.7302	54.9577	26.8606	29.1248	12.1187	14.3437	24.7089	33.1823	16.8612	21.0425	19.7242	23.0559	27.9601	45.7125	45.9008
689	18.1445	14.4449	7.46382	17.2407	9.22547	10.1273	9.01165	16.4151	10.0662	15.1452	13.2626	21.5004	23.2901	30.8389	15.4008	13.6633	39.6233	38.259	27.1755	19.441	12.9392	8.98367	12.46	17.7794	10.7386	54.9652	26.8617	29.1667	12.1446	14.3769	24.747	33.1817	16.8944	21.0328	19.7242	23.0496	27.9947	45.7517	45.9836
690	18.1528	14.4498	7.46328	17.2428	9.22456	10.1243	9.00851	16.4175	10.0698	15.1436	13.2817	21.5404	23.3452	30.8314	15.399	13.684	39.6233	38.2642	27.2138	19.4766	12.9648	8.99084	12.4878	17.8127	10.7448	54.9692	26.8628	29.2059	12.1692	14.4175	24.7849	33.1801	16.9242	21.0215	19.7257	23.0412	28.0253	45.79	46.0708
691	18.1655	14.4576	7.46176	17.2459	9.22381	10.1225	9.00526	16.4188	10.0728	15.1406	13.2999	21.5797	23.4005	30.8257	15.3966	13.7088	39.6245	38.2703	27.2496	19.5124	12.9904	8.99945	12.517	17.8469	10.7495	54.9724	26.8641	29.2449	12.1958	14.4622	24.8237	33.1787	16.9545	21.0125	19.7292	23.0311	28.0559	45.8278	46.1575
692	18.183	14.4683	7.45892	17.2499	9.22714	10.1215	9.00453	16.4173	10.076	15.1415	13.3197	21.6192	23.4539	30.8196	15.3938	13.7379	39.6286	38.2772	27.2886	19.5498	13.0175	9.01528	12.5483	17.8878	10.7555	54.9792	26.8649	29.2869	12.2265	14.5059	24.8642	33.1784	16.9897	21.0085	19.7333	23.0212	28.0918	45.8671	46.2405
693	18.1954	14.4758	7.45663	17.25	9.22944	10.124	9.00665	16.4192	10.084	15.1412	13.341	21.6622	23.5066	30.8151	15.3904	13.7653	39.6303	38.285	27.3298	19.588	13.0472	9.02734	12.5802	17.9252	10.7624	54.9841	26.8654	29.3273	12.2542	14.5527	24.9061	33.1747	17.0214	21.001	19.7337	23.0134	28.1252	45.9089	46.3255
694	18.2056	14.4819	7.45355	17.2507	9.22932	10.1223	9.00704	16.4191	10.0901	15.1391	13.3621	21.7025	23.5587	30.8094	15.3859	13.7894	39.6306	38.289	27.3685	19.6248	13.0756	9.03721	12.6089	17.962	10.7703	54.9866	26.865	29.3682	12.2811	14.5984	24.9462	33.1723	17.0519	20.9906	19.7341	23.0033	28.1567	45.9486	46.4129
695	18.216	14.4878	7.44834	17.2536	9.22651	10.1142	9.00245	16.4145	10.0914	15.1355	13.3817	21.738	23.6106	30.8006	15.3803	13.8104	39.6303	38.288	27.4037	19.6596	13.1003	9.04638	12.6339	17.9992	10.777	54.9867	26.8641	29.41	12.3074	14.64	24.9834	33.1721	17.0831	20.9785	19.7352	22.989	28.1868	45.9841	46.5008
696	18.2223	14.4913	7.43922	17.2527	9.22176	10.1083	8.99107	16.4099	10.0937	15.1309	13.3981	21.777	23.6634	30.7887	15.3735	13.831	39.6271	38.2876	27.4416	19.6939	13.1229	9.05387	12.6616	18.0319	10.7755	54.9833	26.8657	29.447	12.3278	14.6774	25.0202	33.1648	17.1154	20.9653	19.7317	22.9749	28.214	46.0192	46.5829
697	18.2269	14.4929	7.43323	17.2494	9.21857	10.1012	8.98539	16.4053	10.0933	15.1274	13.4142	21.8127	23.7148	30.778	15.3663	13.85	39.6241	38.2887	27.4807	19.7279	13.1465	9.06312	12.6879	18.0658	10.7748	54.9788	26.8643	29.4857	12.3487	14.7127	25.0577	33.1575	17.147	20.9527	19.7296	22.9625	28.2438	46.0551	46.6628
698	18.2316	14.4929	7.42968	17.2449	9.21719	10.0937	8.98372	16.4017	10.0927	15.1243	13.4311	21.847	23.7647	30.7691	15.359	13.8676	39.6219	38.2915	27.5198	19.7627	13.1715	9.07317	12.7137	18.1011	10.7775	54.9754	26.8614	29.5274	12.3734	14.7465	25.0956	33.1528	17.1782	20.9413	19.7289	22.9505	28.2748	46.0901	46.7404
699	18.2387	14.492	7.42296	17.2408	9.21571	10.0887	8.97538	16.4002	10.0977	15.1185	13.4485	21.8872	23.8142	30.7604	15.3515	13.885	39.6198	38.2951	27.5577	19.7998	13.1968	9.0804	12.7429	18.1348	10.7818	54.9756	26.8629	29.5698	12.4033	14.7788	25.1318	33.1513	17.2109	20.9305	19.7261	22.9355	28.3009	46.1207	46.814
700	18.2436	14.4926	7.41786	17.2397	9.21369	10.0842	8.97222	16.3973	10.0997	15.1136	13.4639	21.9263	23.8656	30.7526	15.3453	13.9035	39.6171	38.2947	27.5973	19.835	13.2218	9.09099	12.7755	18.1727	10.7845	54.9707	26.8661	29.6116	12.4302	14.8133	25.1683	33.1495	17.244	20.9208	19.7251	22.9211	28.3285	46.1558	46.8917
701	18.2487	14.4935	7.41433	17.2391	9.21207	10.0815	8.97162	16.3947	10.1012	15.1086	13.4811	21.9642	23.9187	30.7446	15.3397	13.9231	39.614	38.2938	27.6387	19.8698	13.2474	9.10215	12.8076	18.2129	10.7875	54.9635	26.8691	29.6537	12.4573	14.8486	25.2048	33.1474	17.2779	20.9111	19.7243	22.908	28.3597	46.1924	46.9681
702	18.2553	14.4929	7.41135	17.2363	9.21204	10.0812	8.96925	16.3942	10.1054	15.1029	13.503	22.0022	23.9721	30.7357	15.3342	13.943	39.6103	38.2967	27.6811	19.9064	13.2744	9.11106	12.8365	18.2518	10.7929	54.9575	26.8713	29.6968	12.4882	14.8833	25.2406	33.1459	17.3125	20.9006	19.7218	22.8955	28.3933	46.2259	47.0374
703	18.2631	14.4935	7.40885	17.2328	9.21388	10.0777	8.96936	16.3937	10.1085	15.1021	13.5219	22.0407	24.0225	30.7307	15.332	13.9635	39.605	38.2995	27.7214	19.9428	13.303	9.12547	12.8712	18.2848	10.7949	54.9488	26.8751	29.7394	12.5177	14.9198	25.2756	33.1436	17.3482	20.889	19.7213	22.8793	28.4207	46.2569	47.1082
704	18.2685	14.4923	7.40845	17.2299	9.21644	10.0746	8.96959	16.3922	10.1141	15.1029	13.5409	22.0785	24.0733	30.7258	15.3295	13.984	39.6005	38.3006	27.7622	19.9781	13.3304	9.13997	12.9044	18.3203	10.7992	54.9386	26.8804	29.7828	12.5475	14.9545	25.3097	33.1415	17.3848	20.8784	19.7228	22.8656	28.4466	46.288	47.1767
705	18.2735	14.4887	7.40954	17.2278	9.21836	10.0735	8.96916	16.3901	10.1226	15.1025	13.5617	22.116	24.1263	30.7191	15.3247	14.0041	39.5972	38.3003	27.8048	20.0143	13.3566	9.15199	12.9339	18.3608	10.8067	54.9283	26.8859	29.8274	12.5787	14.9867	25.3432	33.1403	17.422	20.8701	19.7253	22.8553	28.4742	46.3194	47.2417
706	18.2778	14.4862	7.40676	17.2261	9.21724	10.0705	8.97099	16.3908	10.1271	15.0992	13.5816	22.1569	24.1798	30.7126	15.3185	14.0228	39.593	38.3021	27.8486	20.0596	13.3871	9.16455	12.9655	18.3996	10.8081	54.9188	26.888	29.8721	12.6102	15.0209	25.378	33.1409	17.4594	20.8644	19.7267	22.8398	28.5054	46.3489	47.3058
707	18.2816	14.4835	7.40728	17.223	9.21896	10.0695	8.97005	16.3907	10.1346	15.0978	13.6027	22.1985	24.2342	30.708	15.3158	14.0422	39.5886	38.3045	27.8928	20.0992	13.4181	9.17833	13.0016	18.4358	10.8125	54.9109	26.8925	29.9169	12.6441	15.0566	25.413	33.1405	17.4981	20.8571	19.725	22.8247	28.5344	46.3748	47.3679
708	18.286	14.4807	7.41049	17.2188	9.22325	10.0714	8.96814	16.3909	10.144	15.0983	13.6242	22.2395	24.2885	30.7045	15.3153	14.0625	39.584	38.3071	27.9369	20.136	13.4482	9.19314	13.0405	18.4719	10.8187	54.9028	26.8988	29.9615	12.6783	15.0921	25.4492	33.1392	17.538	20.8476	19.7225	22.8108	28.5614	46.4014	47.4282
709	18.2916	14.4782	7.41185	17.215	9.22658	10.0756	8.97052	16.3943	10.1499	15.098	13.6437	22.2794	24.3413	30.6998	15.3122	14.0829	39.5792	38.3097	27.9809	20.1813	13.4768	9.20808	13.0777	18.5123	10.8205	54.8911	26.9037	30.005	12.7089	15.1248	25.4874	33.1385	17.5785	20.8376	19.7239	22.797	28.5891	46.4345	47.4871
710	18.2973	14.4757	7.41274	17.2135	9.22922	10.0767	8.97491	16.3968	10.1571	15.0985	13.6653	22.3187	24.3906	30.6968	15.307	14.1055	39.5742	38.31	28.0268	20.2222	13.5067	9.22229	13.1117	18.5516	10.8251	54.8787	26.91	30.0496	12.7424	15.1561	25.5193	33.1377	17.619	20.8295	19.7269	22.7823	28.6195	46.4629	47.547
711	18.3018	14.4732	7.41484	17.2121	9.23058	10.077	8.97655	16.3981	10.1658	15.097	13.6869	22.3565	24.4409	30.6946	15.3033	14.1285	39.5713	38.3138	28.0737	20.2617	13.5377	9.23691	13.1462	18.5905	10.8318	54.8686	26.9159	30.0958	12.7782	15.1889	25.5507	33.1373	17.6593	20.8222	19.7295	22.7672	28.6496	46.4893	47.6045
712	18.3062	14.4701	7.41849	17.2089	9.23141	10.0788	8.97409	16.3988	10.1747	15.0921	13.7061	22.3928	24.4956	30.692	15.3036	14.1502	39.5706	38.3234	28.12	20.3041	13.5691	9.25297	13.1839	18.6297	10.8379	54.8608	26.9196	30.1429	12.814	15.2248	25.587	33.1371	17.6994	20.8147	19.731	22.7518	28.6774	46.5162	47.6576
713	18.3102	14.464	7.41845	17.204	9.23842	10.0773	8.98245	16.4006	10.1799	15.092	13.725	22.4312	24.549	30.6889	15.3013	14.1703	39.5641	38.3208	28.1664	20.3468	13.6002	9.26953	13.2215	18.6653	10.8397	54.844	26.9242	30.1857	12.8449	15.2596	25.6198	33.1346	17.7402	20.8064	19.7339	22.7349	28.7074	46.5413	47.7103
714	18.3138	14.4566	7.41644	17.1996	9.24227	10.0766	8.98667	16.402	10.1849	15.0927	13.7438	22.47	24.5986	30.6848	15.2987	14.1902	39.5582	38.3224	28.213	20.3895	13.6306	9.28504	13.2587	18.7025	10.8457	54.8261	26.9285	30.2303	12.8758	15.2936	25.6512	33.1313	17.7812	20.8001	19.7354	22.7175	28.7374	46.5644	47.76
715	18.3171	14.448	7.41385	17.1955	9.24099	10.0778	8.98349	16.4025	10.1919	15.0917	13.7616	22.5067	24.6448	30.6801	15.2962	14.2105	39.5545	38.3316	28.2588	20.4309	13.6601	9.29896	13.2957	18.7418	10.8554	54.8098	26.9313	30.2766	12.9088	15.3259	25.6818	33.127	17.8214	20.7949	19.7344	22.6994	28.7667	46.5856	47.8052
716	18.3157	14.4348	7.41139	17.1868	9.24379	10.0781	8.98783	16.4033	10.2011	15.0887	13.776	22.5378	24.6919	30.6762	15.2914	14.2304	39.5474	38.3309	28.3001	20.4678	13.6886	9.31195	13.3335	18.7759	10.8548	54.7898	26.9318	30.3149	12.9424	15.3548	25.7102	33.1193	17.8585	20.783	19.732	22.6799	28.7955	46.6045	47.8454
717	18.3164	14.4224	7.40945	17.1788	9.24528	10.0753	8.98587	16.4035	10.207	15.0839	13.7902	22.5686	24.7368	30.6724	15.2871	14.2498	39.5404	38.3321	28.3451	20.5068	13.7157	9.32637	13.3682	18.812	10.8589	54.7674	26.9322	30.357	12.9725	15.3829	25.7377	33.1124	17.8979	20.772	19.7321	22.6605	28.823	46.6204	47.8822
718	18.3144	14.4095	7.4074	17.1707	9.24521	10.0718	8.98156	16.403	10.2114	15.0773	13.8047	22.6004	24.7802	30.6686	15.2831	14.2662	39.5345	38.335	28.3914	20.5479	13.7431	9.3412	13.401	18.8487	10.8645	54.7428	26.9325	30.4004	13.0012	15.4088	25.765	33.1059	17.9387	20.7623	19.7333	22.6401	28.8499	46.6322	47.9113
719	18.3088	14.3917	7.40416	17.1594	9.24506	10.0715	8.98508	16.4023	10.2189	15.0694	13.8184	22.6325	24.8241	30.6651	15.2785	14.2774	39.5289	38.3353	28.4328	20.588	13.7731	9.35393	13.4355	18.8813	10.8623	54.7162	26.9314	30.4374	13.0331	15.4299	25.7924	33.0973	17.978	20.7516	19.732	22.6177	28.8768	46.6395	47.9283
720	18.3038	14.3725	7.40022	17.1456	9.24358	10.0648	8.98715	16.4014	10.2216	15.0648	13.8318	22.6615	24.8638	30.6596	15.2721	14.2936	39.5204	38.3406	28.4759	20.6259	13.7992	9.36474	13.4708	18.9117	10.866	54.6878	26.9278	30.4778	13.0613	15.45	25.817	33.0894	18.0184	20.7406	19.7311	22.5987	28.9014	46.6455	47.9405
721	18.2985	14.3506	7.39512	17.1317	9.24304	10.0587	8.98572	16.3996	10.2246	15.0603	13.8436	22.6884	24.9026	30.6547	15.2649	14.3087	39.5105	38.3453	28.5199	20.6652	13.8234	9.37668	13.5058	18.9426	10.8698	54.6569	26.9251	30.5192	13.0911	15.4694	25.8398	33.0804	18.0575	20.7287	19.7283	22.5776	28.9226	46.6469	47.9439
722	18.2913	14.3251	7.38873	17.1185	9.24413	10.0582	8.98179	16.397	10.2315	15.0533	13.8532	22.7152	24.9428	30.6521	15.2577	14.3179	39.5003	38.345	28.5636	20.7079	13.8483	9.39137	13.5396	18.9753	10.8683	54.6226	26.9254	30.5584	13.1256	15.4865	25.8615	33.0693	18.094	20.7162	19.723	22.5526	28.9421	46.6427	47.9374
723	18.2819	14.2991	7.38216	17.1007	9.24052	10.0525	8.98204	16.3964	10.2342	15.0468	13.863	22.7429	24.9791	30.649	15.2498	14.3277	39.4885	38.3452	28.6079	20.7477	13.8745	9.40486	13.571	19.0046	10.8688	54.584	26.9228	30.596	13.1558	15.4981	25.8801	33.0588	18.1319	20.7077	19.7229	22.5294	28.9679	46.638	47.9282
724	18.2697	14.2707	7.37721	17.0803	9.23871	10.0462	8.98376	16.3939	10.2396	15.0404	13.8733	22.769	25.0161	30.6453	15.2436	14.3359	39.4756	38.3473	28.649	20.7867	13.8999	9.41715	13.605	19.0333	10.8692	54.5425	26.9186	30.6309	13.184	15.5056	25.8954	33.0481	18.1694	20.697	19.7219	22.5073	28.9937	46.6299	47.9113
725	18.2557	14.2371	7.37293	17.0576	9.23947	10.041	8.98466	16.39	10.2478	15.0337	13.8842	22.7928	25.0554	30.6408	15.239	14.3416	39.4606	38.3502	28.6878	20.8265	13.9234	9.42904	13.6411	19.0621	10.8693	54.4968	26.9136	30.6644	13.2123	15.5085	25.908	33.0367	18.2066	20.6827	19.7183	22.4842	29.016	46.6172	47.8861
726	18.2394	14.1944	7.36516	17.0315	9.23726	10.0361	8.98269	16.3898	10.2512	15.0271	13.8958	22.816	25.0956	30.6356	15.2332	14.346	39.4413	38.3499	28.7302	20.8675	13.9447	9.44218	13.6729	19.0896	10.8696	54.4424	26.9087	30.7009	13.2423	15.5042	25.9201	33.025	18.2466	20.6691	19.7161	22.4572	29.0332	46.5992	47.8523
727	18.2169	14.1422	7.35743	16.998	9.23473	10.0321	8.98194	16.3875	10.2547	15.0192	13.9063	22.8412	25.1301	30.6319	15.2254	14.3436	39.424	38.3453	28.7719	20.904	13.9609	9.45567	13.7034	19.1101	10.868	54.3762	26.903	30.7335	13.2734	15.4887	25.9237	33.0113	18.2847	20.657	19.7123	22.431	29.046	46.5671	47.7883
728	18.1854	14.0713	7.34861	16.9483	9.23297	10.0287	8.98366	16.3841	10.2592	15.0117	13.9142	22.8662	25.1603	30.6277	15.2171	14.3307	39.4021	38.3383	28.8133	20.9372	13.9668	9.46786	13.7319	19.121	10.8624	54.2904	26.8968	30.763	13.3038	15.4533	25.9105	32.9909	18.3219	20.6436	19.7083	22.4041	29.0538	46.5143	47.6834
729	18.1411	13.9667	7.3365	16.8714	9.2327	10.0249	8.98726	16.3823	10.2647	15.0069	13.9187	22.887	25.1904	30.62	15.2104	14.3019	39.3649	38.3316	28.855	20.9705	13.9565	9.47719	13.757	19.1206	10.8523	54.1707	26.89	30.7916	13.3317	15.3841	25.869	32.9587	18.3601	20.6254	19.7059	22.3744	29.0512	46.4273	47.5161
730	18.069	13.8009	7.32326	16.7518	9.23535	10.0182	8.98638	16.3782	10.2698	14.9993	13.9248	22.9031	25.2191	30.6135	15.2025	14.2423	39.3104	38.3214	28.8923	21.0027	13.925	9.48655	13.7786	19.1019	10.8472	53.9823	26.8801	30.8144	13.3565	15.2523	25.7698	32.9138	18.3968	20.608	19.7036	22.3443	29.0245	46.2864	47.2506
731	17.9495	13.5666	7.30911	16.6027	9.23543	10.0137	8.98631	16.3747	10.2742	14.9916	13.9308	22.9209	25.2474	30.6049	15.1932	14.1354	39.2319	38.3037	28.9281	21.0316	13.8926	9.49498	13.7991	19.0819	10.8408	53.6809	26.862	30.8277	13.3839	15.0115	25.6277	32.8631	18.4341	20.5874	19.6969	22.3097	28.9312	45.9776	46.691
732	17.7846	13.285	7.29544	16.4421	9.23133	10.013	8.98995	16.3731	10.2787	14.9851	13.9358	22.9425	25.2758	30.5918	15.1832	13.9864	39.1293	38.2736	28.9643	21.0548	13.8753	9.50227	13.821	19.0753	10.8301	53.2581	26.8328	30.829	13.4158	14.6682	25.4769	32.813	18.4723	20.56	19.6838	22.2691	28.7385	45.4589	45.7555
733	17.6251	13.0305	7.28723	16.2914	9.23289	10.0079	8.99083	16.3698	10.2857	14.977	13.9434	22.9584	25.3027	30.5761	15.175	13.8443	39.0154	38.2235	28.9967	21.0692	13.8747	9.51137	13.846	19.0875	10.8251	52.7687	26.7939	30.8171	13.4437	14.3402	25.3841	32.7675	18.5048	20.5248	19.6683	22.2238	28.4095	44.7489	44.4525
734	17.514	12.8497	7.28236	16.1464	9.23428	10.0019	8.99094	16.3688	10.2939	14.9699	13.9513	22.9731	25.3284	30.5583	15.1653	13.7486	38.9114	38.1528	29.0266	21.0804	13.8799	9.51939	13.8747	19.1045	10.8215	52.3372	26.7597	30.8051	13.4685	14.1173	25.3472	32.725	18.5414	20.4856	19.6484	22.1693	28.2393	44.3797	43.7502
735	17.4379	12.7221	7.27874	16.0034	9.23443	9.99656	8.99277	16.3691	10.3015	14.9643	13.958	22.989	25.3539	30.5397	15.153	13.6902	38.8217	38.0636	29.0559	21.0944	13.8831	9.52699	13.9047	19.117	10.8184	52.0282	26.7352	30.7969	13.4918	13.9787	25.3434	32.6842	18.5813	20.4475	19.6273	22.1004	28.2648	44.3647	43.7181
736	17.3396	12.567	7.27405	15.8587	9.23592	9.9916	8.99946	16.3664	10.3059	14.9583	13.9621	23.0076	25.3805	30.5225	15.1387	13.6184	38.7359	37.9608	29.0874	21.1172	13.8786	9.53765	13.931	19.1194	10.818	51.8549	26.7171	30.7893	13.5161	13.8066	25.3286	32.6433	18.6141	20.4166	19.6114	22.0163	28.4005	44.4881	44.0088
737	17.2532	12.437	7.2701	15.7604	9.23851	9.98701	9.00285	16.366	10.3112	14.9534	13.9681	23.0227	25.4015	30.5106	15.1245	13.5683	38.6588	37.859	29.1204	21.1493	13.8783	9.54912	13.9555	19.1185	10.8144	51.76	26.7063	30.7859	13.5444	13.6685	25.2988	32.6068	18.6509	20.3909	19.5945	21.9432	28.4992	44.5467	44.157
738	17.2252	12.3819	7.26745	15.7186	9.24116	9.98436	9.00515	16.367	10.319	14.9496	13.9753	23.036	25.4212	30.5045	15.1132	13.5719	38.5994	37.7756	29.1546	21.1876	13.8843	9.56308	13.9795	19.1213	10.8092	51.7109	26.6995	30.7931	13.5719	13.6495	25.2637	32.5787	18.6886	20.3711	19.5823	21.8951	28.549	44.5592	44.1819
739	17.283	12.4238	7.26607	15.72	9.24305	9.98462	9.01008	16.3673	10.3293	14.9463	13.9819	23.0507	25.4449	30.5031	15.1067	13.6421	38.5639	37.7253	29.1902	21.2267	13.8962	9.58064	14.0042	19.1337	10.8059	51.68	26.6935	30.8153	13.5945	13.7948	25.2374	32.5615	18.7221	20.358	19.5817	21.8727	28.5555	44.5427	44.1233
740	17.3336	12.4521	7.2641	15.7078	9.24638	9.98318	9.01169	16.3678	10.3372	14.9408	13.9878	23.0656	25.4655	30.5034	15.103	13.7039	38.5386	37.7118	29.2278	21.2594	13.9145	9.59464	14.0296	19.1541	10.8077	51.6384	26.6922	30.8447	13.6268	13.9286	25.2179	32.5507	18.7579	20.3502	19.5851	21.8525	28.5126	44.4276	43.8902
741	17.3164	12.4026	7.26476	15.6648	9.2496	9.98095	9.01489	16.368	10.3452	14.9355	13.9931	23.0803	25.4868	30.5047	15.1002	13.7087	38.514	37.7191	29.2662	21.2887	13.9386	9.60759	14.0575	19.1793	10.809	51.5447	26.6929	30.8737	13.6572	13.9257	25.2157	32.5409	18.7936	20.3432	19.5898	21.8339	28.4489	44.2673	43.5915
742	17.2216	12.2735	7.26859	15.6006	9.25191	9.97875	9.02137	16.368	10.354	14.9313	13.9982	23.0944	25.5104	30.5071	15.0966	13.6502	38.4892	37.7346	29.305	21.3187	13.9705	9.62143	14.0887	19.2103	10.8093	51.3902	26.695	30.8993	13.6813	13.7647	25.2446	32.5322	18.8278	20.335	19.5942	21.8192	28.3627	44.0597	43.2288
743	17.1156	12.1599	7.27019	15.5675	9.25429	9.97611	9.02535	16.3694	10.3594	14.9247	14.0029	23.1075	25.5325	30.5115	15.0915	13.5841	38.4782	37.756	29.3443	21.354	14.0196	9.63602	14.1221	19.2576	10.8197	51.2091	26.7037	30.9257	13.7112	13.5802	25.3279	32.5337	18.8622	20.3284	19.5987	21.8141	28.2322	43.7696	42.7357
744	17.0623	12.1203	7.27406	15.5623	9.25702	9.97477	9.02958	16.3694	10.3645	14.9176	14.0063	23.1193	25.5545	30.5149	15.0861	13.5628	38.4863	37.7658	29.3822	21.3883	14.0798	9.64907	14.1559	19.3145	10.8302	51.0969	26.713	30.9525	13.7384	13.5013	25.45	32.5489	18.8987	20.3237	19.6024	21.8087	28.0968	43.5002	42.2598
745	17.0698	12.1522	7.27858	15.5752	9.25917	9.97406	9.03385	16.3692	10.3711	14.9109	14.0092	23.1306	25.5744	30.5168	15.0808	13.5923	38.5079	37.7578	29.4173	21.4207	14.1412	9.66164	14.1884	19.3716	10.838	51.1154	26.7226	30.9816	13.7627	13.5448	25.581	32.5716	18.9352	20.3198	19.6049	21.7985	28.0143	43.3416	41.9594
746	17.1066	12.2063	7.27897	15.5887	9.25913	9.97192	9.03664	16.3719	10.3802	14.9053	14.0129	23.1427	25.5883	30.5191	15.0747	13.6443	38.5295	37.7339	29.4494	21.4533	14.1911	9.67673	14.2175	19.4175	10.8442	51.2982	26.7348	31.0153	13.7881	13.6445	25.6813	32.5895	18.9671	20.3143	19.6062	21.7813	28.0312	43.3518	41.9464
747	17.1048	12.2126	7.27959	15.5951	9.2594	9.96892	9.04089	16.3723	10.3884	14.8994	14.0132	23.1499	25.599	30.5251	15.0666	13.6692	38.5413	37.707	29.4834	21.4879	14.2313	9.69276	14.2447	19.4531	10.8462	51.5645	26.7488	31.0443	13.8124	13.6734	25.7489	32.5998	18.9972	20.3132	19.6105	21.7584	28.1382	43.4879	42.1547
748	17.0867	12.2046	7.2798	15.6055	9.26019	9.96497	9.04294	16.3716	10.3965	14.8917	14.0116	23.1537	25.61	30.5332	15.0588	13.6854	38.5545	37.692	29.518	21.5237	14.264	9.70804	14.2695	19.481	10.8484	51.8617	26.7653	31.0743	13.8367	13.679	25.7996	32.6056	19.0264	20.3157	19.6171	21.7282	28.2873	43.7006	42.5002
749	17.1033	12.2413	7.27854	15.6373	9.261	9.96015	9.04087	16.3715	10.405	14.8818	14.0101	23.1567	25.6227	30.5417	15.0536	13.7314	38.5831	37.7029	29.5513	21.5608	14.2926	9.72218	14.2916	19.5045	10.8537	52.1501	26.7839	31.112	13.8618	13.7563	25.8516	32.6116	19.0548	20.3203	19.6254	21.6914	28.4681	43.975	42.9656
750	17.2085	12.3811	7.2767	15.7142	9.26054	9.95513	9.04521	16.371	10.4099	14.8745	14.008	23.1602	25.6296	30.5533	15.0509	13.8582	38.6333	37.7535	29.5862	21.6063	14.3234	9.7401	14.3121	19.5253	10.8535	52.4176	26.8001	31.1538	13.8863	14.0166	25.9093	32.6209	19.0809	20.3308	19.6381	21.6515	28.7311	44.3518	43.6453
751	17.3539	12.5798	7.27662	15.8279	9.26022	9.95167	9.04862	16.3711	10.414	14.8672	14.0066	23.1648	25.6363	30.5635	15.0491	14.0293	38.6949	37.8258	29.621	21.6565	14.3661	9.7594	14.3325	19.55	10.8508	52.6378	26.8126	31.1996	13.9105	14.3784	25.9781	32.6343	19.107	20.3397	19.6517	21.6139	28.9675	44.7056	44.2634
752	17.4947	12.7846	7.27785	15.9584	9.26015	9.94964	9.04869	16.3715	10.4183	14.8577	14.0047	23.1693	25.6444	30.5717	15.0474	14.2054	38.7573	37.906	29.6539	21.7076	14.4208	9.7788	14.3537	19.5813	10.85	52.7995	26.8212	31.2463	13.9349	14.7497	26.0566	32.6509	19.1342	20.345	19.6652	21.5839	29.1448	44.9926	44.742
753	17.5896	12.934	7.27589	16.0718	9.25844	9.94632	9.05014	16.3697	10.4207	14.8447	13.9971	23.1694	25.6492	30.5832	15.0458	14.345	38.8086	37.9875	29.6828	21.7559	14.4765	9.79896	14.3762	19.617	10.8583	52.909	26.8275	31.286	13.9605	15.0268	26.1341	32.668	19.1622	20.3522	19.6807	21.5658	29.2682	45.21	45.0983
754	17.6405	13.0208	7.27447	16.1475	9.25711	9.94194	9.05411	16.3667	10.425	14.8349	13.992	23.1698	25.6533	30.5898	15.0444	14.4394	38.8472	38.0629	29.7125	21.7987	14.5237	9.81615	14.3948	19.6492	10.8602	52.9888	26.8308	31.3217	13.9841	15.2088	26.2029	32.6788	19.1861	20.358	19.6929	21.5548	29.3734	45.3877	45.3947
755	17.6574	13.0582	7.2736	16.192	9.25611	9.93636	9.05738	16.3641	10.4308	14.8271	13.989	23.1693	25.6555	30.5949	15.0424	14.4954	38.8748	38.1349	29.7419	21.8355	14.5597	9.83086	14.4093	19.6736	10.8573	53.0527	26.8322	31.3534	14.0046	15.3106	26.2626	32.6824	19.2074	20.3615	19.7029	21.5471	29.4572	45.5214	45.6165
756	17.6583	13.0749	7.27186	16.2276	9.2545	9.9297	9.05547	16.3634	10.4359	14.8167	13.984	23.1648	25.6543	30.6056	15.0395	14.5318	38.8957	38.2102	29.7678	21.8676	14.5866	9.84537	14.4216	19.6893	10.8576	53.1103	26.8336	31.3805	14.0224	15.3668	26.3172	32.6816	19.2301	20.3624	19.7142	21.539	29.5177	45.6123	45.7592
757	17.6652	13.103	7.26889	16.2741	9.25124	9.92362	9.05352	16.3616	10.4396	14.8053	13.9794	23.1611	25.6563	30.6154	15.036	14.5736	38.9159	38.2833	29.7935	21.9016	14.6166	9.86014	14.4348	19.7079	10.8586	53.1671	26.8366	31.4044	14.0422	15.4328	26.3702	32.6824	19.2509	20.3635	19.7259	21.5284	29.5653	45.6771	45.8545
758	17.6881	13.1554	7.26738	16.3291	9.24891	9.91943	9.0537	16.3581	10.4448	14.7945	13.9717	23.1587	25.6561	30.6215	15.0312	14.6327	38.9347	38.35	29.817	21.9341	14.6492	9.87402	14.4475	19.7267	10.859	53.2297	26.8386	31.4258	14.0621	15.5358	26.4231	32.6844	19.2716	20.3637	19.7357	21.5121	29.6312	45.7671	46.0059
759	17.7278	13.2313	7.26814	16.3851	9.24864	9.91642	9.05647	16.3536	10.4522	14.785	13.9603	23.1565	25.651	30.6243	15.025	14.7115	38.9507	38.4061	29.8376	21.9634	14.6808	9.88647	14.4587	19.742	10.8574	53.2987	26.8386	31.4447	14.08	15.6822	26.4764	32.6854	19.2928	20.3622	19.7432	21.4898	29.7274	45.9049	46.256
760	17.7718	13.3099	7.26546	16.4319	9.24599	9.90811	9.05909	16.3525	10.455	14.7745	13.9557	23.1509	25.6495	30.6321	15.0203	14.7978	38.9654	38.4443	29.8602	21.9966	14.7062	9.89936	14.4708	19.7548	10.8516	53.3601	26.8412	31.4596	14.0963	15.8476	26.5303	32.6816	19.31	20.3607	19.752	21.4638	29.8498	46.0894	46.5965
761	17.8068	13.3736	7.26353	16.4704	9.24482	9.90224	9.06095	16.3511	10.4577	14.7649	13.9488	23.1431	25.6432	30.638	15.0138	14.8768	38.9743	38.4761	29.8801	22.0282	14.7269	9.91196	14.4809	19.7639	10.8489	53.4133	26.8423	31.4732	14.1108	15.9959	26.5823	32.676	19.3289	20.3583	19.7561	21.4369	29.965	46.2772	46.9453
762	17.8278	13.4165	7.26287	16.5029	9.24492	9.89929	9.06265	16.3486	10.4623	14.7559	13.9386	23.135	25.6332	30.6412	15.0057	14.9427	38.9773	38.5057	29.8969	22.0575	14.7453	9.92404	14.4876	19.77	10.8491	53.4541	26.8415	31.4847	14.1254	16.1111	26.6293	32.6698	19.3495	20.355	19.7574	21.4099	30.0646	46.4397	47.2525
763	17.8382	13.4439	7.26074	16.5334	9.24234	9.89319	9.06593	16.3465	10.4684	14.7458	13.9315	23.1291	25.6289	30.646	14.9995	14.9983	38.9777	38.5311	29.9148	22.0882	14.7645	9.9358	14.491	19.7755	10.8458	53.4741	26.8422	31.4906	14.1436	16.1958	26.6664	32.6627	19.3662	20.3513	19.7651	21.3825	30.1488	46.5619	47.4915
764	17.845	13.4696	7.25867	16.5616	9.24198	9.88929	9.06857	16.3424	10.4742	14.735	13.924	23.1209	25.621	30.65	14.9958	15.0457	38.9786	38.562	29.9293	22.1142	14.7847	9.94862	14.4946	19.783	10.8401	53.492	26.8416	31.4997	14.16	16.2705	26.7003	32.656	19.3822	20.3486	19.7732	21.3549	30.2202	46.6606	47.6806
765	17.8509	13.4963	7.25774	16.5886	9.24221	9.88523	9.07056	16.3385	10.4784	14.7252	13.916	23.1122	25.6111	30.6541	14.9913	15.0916	38.9797	38.5955	29.9425	22.1381	14.8045	9.96118	14.4987	19.7892	10.8354	53.508	26.8394	31.5085	14.174	16.3444	26.7312	32.6497	19.3973	20.3458	19.7809	21.3272	30.2853	46.7475	47.8463
766	17.856	13.5211	7.25816	16.6142	9.24056	9.87796	9.07278	16.3371	10.4814	14.7172	13.9079	23.1056	25.6029	30.6593	14.9832	15.1409	38.9787	38.6263	29.9575	22.1639	14.8221	9.97201	14.5028	19.7906	10.8345	53.5175	26.836	31.5114	14.1869	16.4192	26.758	32.643	19.4107	20.3414	19.7885	21.2992	30.3472	46.8272	48.001
767	17.8567	13.537	7.25591	16.6307	9.2411	9.87303	9.07768	16.3331	10.4883	14.7083	13.8986	23.0973	25.593	30.6631	14.9776	15.1834	38.9719	38.6575	29.9712	22.1864	14.8367	9.98418	14.5061	19.792	10.8334	53.5227	26.8332	31.5127	14.2038	16.4825	26.7823	32.6359	19.4265	20.3387	19.7931	21.2703	30.4035	46.8955	48.1392
768	17.8528	13.5411	7.25372	16.6392	9.24167	9.87032	9.08001	16.3308	10.4954	14.6992	13.889	23.0873	25.5819	30.6673	14.9727	15.2169	38.9621	38.6853	29.9829	22.2078	14.8505	9.99598	14.5086	19.7938	10.83	53.5215	26.8331	31.5128	14.217	16.5271	26.8031	32.6279	19.4418	20.3362	19.7991	21.2393	30.4542	46.9475	48.2384
769	17.8388	13.5346	7.2533	16.6422	9.24136	9.86854	9.07952	16.3317	10.5004	14.6906	13.88	23.0763	25.5703	30.6721	14.967	15.2419	38.9514	38.707	29.9931	22.2304	14.8644	10.0063	14.5097	19.795	10.8252	53.5134	26.8348	31.5111	14.225	16.5524	26.8201	32.6185	19.4549	20.3327	19.8075	21.2074	30.4969	46.9835	48.3014
770	17.8226	13.5234	7.25368	16.6426	9.24264	9.86476	9.08794	16.33	10.5061	14.6818	13.8733	23.0648	25.5584	30.6743	14.9605	15.2606	38.9409	38.7221	30.0035	22.2548	14.875	10.0159	14.5075	19.7928	10.8255	53.5005	26.8297	31.5065	14.2415	16.5667	26.8356	32.6084	19.4675	20.328	19.8124	21.1766	30.5295	47.0063	48.3428
771	17.8083	13.5156	7.25367	16.6425	9.24349	9.86177	9.09041	16.3279	10.5113	14.6724	13.8651	23.0555	25.5459	30.6789	14.9554	15.2839	38.9281	38.7374	30.0131	22.2776	14.8879	10.0258	14.5062	19.7909	10.823	53.4833	26.8247	31.5007	14.2525	16.5853	26.8497	32.5983	19.4784	20.3233	19.8164	21.1465	30.5622	47.0244	48.3767
772	17.7956	13.511	7.25326	16.6437	9.24388	9.85906	9.089	16.3266	10.5167	14.6637	13.8551	23.0472	25.5332	30.6845	14.9513	15.311	38.9137	38.7541	30.0211	22.2977	14.9017	10.0369	14.5053	19.7887	10.8169	53.4618	26.8209	31.4948	14.2586	16.6104	26.8612	32.5877	19.4892	20.319	19.8209	21.1161	30.5959	47.0389	48.4012
773	17.7827	13.5043	7.2532	16.6468	9.24477	9.85464	9.09453	16.327	10.5238	14.6582	13.8455	23.0365	25.5209	30.6865	14.9465	15.3345	38.9003	38.7706	30.0268	22.3155	14.9114	10.0494	14.5016	19.7834	10.8107	53.4347	26.8168	31.4893	14.2677	16.6358	26.868	32.5754	19.5021	20.3146	19.8268	21.0845	30.6286	47.0479	48.4109
774	17.7657	13.4949	7.25385	16.6457	9.24581	9.85361	9.09889	16.3268	10.53	14.6502	13.8361	23.0245	25.5044	30.6893	14.941	15.3571	38.8862	38.7835	30.0302	22.3346	14.9191	10.0603	14.4971	19.7793	10.8061	53.3963	26.8115	31.4773	14.2768	16.6556	26.873	32.564	19.5144	20.3098	19.8323	21.0498	30.6537	47.0451	48.3999
775	17.7439	13.4782	7.25333	16.6388	9.24629	9.85173	9.10288	16.3261	10.535	14.6414	13.8279	23.0123	25.4865	30.6922	14.9348	15.3745	38.87	38.7952	30.0326	22.3526	14.926	10.0693	14.4926	19.7722	10.8023	53.3458	26.8045	31.4632	14.2851	16.6628	26.8767	32.5509	19.5245	20.3044	19.8371	21.0174	30.6718	47.0286	48.3637
776	17.7183	13.4512	7.25049	16.6259	9.24616	9.84587	9.10769	16.325	10.5394	14.6339	13.8204	23.0002	25.4699	30.6938	14.928	15.383	38.8505	38.8075	30.0352	22.3681	14.9324	10.0775	14.4881	19.7598	10.7979	53.2842	26.7958	31.4507	14.2916	16.6528	26.8781	32.5342	19.5318	20.2984	19.8411	20.9874	30.6832	46.9944	48.2962
777	17.6871	13.4184	7.24825	16.6097	9.24826	9.84372	9.10991	16.3232	10.5449	14.6253	13.8077	22.9871	25.4542	30.6945	14.9219	15.3837	38.8288	38.8179	30.038	22.3883	14.936	10.0873	14.484	19.7513	10.7935	53.2147	26.7862	31.4342	14.2949	16.6301	26.8707	32.5193	19.5387	20.291	19.8453	20.9554	30.688	46.9382	48.1909
778	17.6503	13.3785	7.24594	16.5875	9.24868	9.84102	9.11169	16.321	10.5502	14.6149	13.7964	22.9733	25.4375	30.6939	14.9159	15.3805	38.8036	38.8233	30.0378	22.406	14.9366	10.0961	14.4763	19.7403	10.7886	53.1352	26.7764	31.4131	14.2992	16.5962	26.8586	32.5024	19.5452	20.2825	19.8488	20.9223	30.6869	46.8744	48.0603
779	17.6104	13.3341	7.24278	16.5596	9.24689	9.83636	9.11479	16.3188	10.5547	14.6038	13.7876	22.9584	25.4191	30.6926	14.9093	15.376	38.7756	38.8245	30.0346	22.4187	14.9351	10.1028	14.4649	19.7254	10.7822	53.0487	26.765	31.3889	14.3048	16.5562	26.8441	32.4824	19.5511	20.2731	19.8508	20.8886	30.686	46.8138	47.9334
780	17.5748	13.2923	7.2378	16.5301	9.24669	9.83203	9.12072	16.3171	10.558	14.595	13.7752	22.9414	25.3987	30.6933	14.901	15.3709	38.7487	38.8275	30.0321	22.4288	14.9339	10.1084	14.454	19.7117	10.7731	52.9644	26.7476	31.366	14.3066	16.5197	26.8274	32.4616	19.5555	20.2632	19.8509	20.8545	30.6895	46.7604	47.829
781	17.5339	13.2449	7.23293	16.4981	9.24626	9.8253	9.12354	16.3129	10.5613	14.5868	13.7619	22.9238	25.3747	30.6917	14.8921	15.3601	38.7182	38.8247	30.0275	22.4396	14.9311	10.1139	14.4451	19.6965	10.7664	52.875	26.7313	31.3406	14.3054	16.4729	26.8106	32.4391	19.5585	20.2534	19.8519	20.8184	30.6898	46.6959	47.7124
782	17.4869	13.1924	7.22797	16.465	9.24482	9.81812	9.12263	16.3084	10.5646	14.5775	13.7484	22.9063	25.349	30.6889	14.8834	15.3451	38.6866	38.8194	30.0211	22.4514	14.9263	10.1199	14.4347	19.68	10.7609	52.7868	26.7175	31.3143	14.3046	16.4168	26.795	32.4157	19.5611	20.243	19.8534	20.7806	30.687	46.6299	47.5918
783	17.439	13.1379	7.22198	16.4313	9.24216	9.81334	9.1201	16.3067	10.5675	14.5657	13.7348	22.889	25.3247	30.6872	14.8752	15.3296	38.658	38.8174	30.0144	22.4627	14.9201	10.1262	14.4187	19.6628	10.753	52.7089	26.7048	31.2897	14.3071	16.3565	26.7807	32.3927	19.5641	20.2313	19.8536	20.7416	30.6823	46.5652	47.4718
784	17.3894	13.081	7.21484	16.3918	9.24025	9.80618	9.12182	16.3009	10.5714	14.5541	13.7221	22.868	25.3023	30.685	14.8645	15.3116	38.6289	38.8123	30.0066	22.4688	14.9132	10.1283	14.403	19.6418	10.7461	52.6339	26.687	31.2619	14.3039	16.2937	26.7635	32.3695	19.5645	20.2207	19.854	20.7023	30.6783	46.4962	47.3525
785	17.3333	13.0135	7.20674	16.3463	9.23806	9.79838	9.12297	16.2956	10.5728	14.542	13.7082	22.8475	25.2778	30.6831	14.8535	15.2825	38.5967	38.8054	29.9979	22.4758	14.906	10.1298	14.3873	19.6183	10.7377	52.5571	26.6679	31.232	14.299	16.2062	26.7393	32.3453	19.5652	20.21	19.8536	20.6642	30.6703	46.4108	47.2063
786	17.2628	12.9235	7.19737	16.2905	9.23461	9.791	9.12108	16.2929	10.5713	14.5291	13.6922	22.8295	25.2498	30.6812	14.8435	15.2318	38.5584	38.7966	29.9884	22.4855	14.8963	10.1329	14.3706	19.5927	10.726	52.4689	26.6503	31.2001	14.295	16.0695	26.7027	32.3185	19.567	20.1981	19.852	20.6257	30.6504	46.2997	47.0143
787	17.1671	12.7955	7.18529	16.2123	9.22944	9.78174	9.12227	16.2855	10.5746	14.5167	13.6764	22.8088	25.224	30.6756	14.8321	15.1475	38.5112	38.7804	29.9768	22.4877	14.8776	10.1333	14.3532	19.5625	10.7127	52.3476	26.6319	31.1621	14.2885	15.8647	26.6485	32.2864	19.565	20.1866	19.8513	20.5848	30.6084	46.1522	46.757
788	17.0296	12.603	7.17039	16.0964	9.22478	9.77245	9.12125	16.2789	10.5762	14.5045	13.6579	22.7863	25.1953	30.669	14.8192	15.0161	38.4513	38.7641	29.9644	22.4876	14.8396	10.1311	14.3298	19.5173	10.699	52.1922	26.6101	31.1216	14.2821	15.5533	26.5632	32.2445	19.5631	20.1711	19.8477	20.5436	30.5363	45.9458	46.3932
789	16.8429	12.3347	7.15341	15.937	9.22096	9.7637	9.11828	16.2731	10.5762	14.4917	13.6378	22.762	25.1633	30.6618	14.8055	14.8326	38.372	38.745	29.9498	22.4852	14.7751	10.1289	14.2998	19.4499	10.6808	51.9942	26.5841	31.0773	14.2745	15.1241	26.432	32.1876	19.5604	20.1525	19.8418	20.5011	30.432	45.6718	45.9161
790	16.608	11.9974	7.13579	15.738	9.21701	9.75516	9.1173	16.2639	10.5791	14.4771	13.6204	22.735	25.1308	30.6529	14.7922	14.604	38.2658	38.7136	29.9306	22.4773	14.6806	10.1306	14.2662	19.3566	10.6504	51.7415	26.5551	31.025	14.2616	14.5986	26.2415	32.1107	19.5529	20.1353	19.8372	20.4567	30.3007	45.3454	45.3566
791	16.4298	11.7353	7.11627	15.563	9.21379	9.74493	9.11597	16.2553	10.5776	14.463	13.6034	22.7099	25.0965	30.6406	14.7782	14.445	38.1482	38.6779	29.9115	22.4626	14.5794	10.1283	14.2323	19.2551	10.6237	51.4437	26.5194	30.9686	14.2501	14.2321	26.0303	32.0245	19.5468	20.113	19.8305	20.4113	30.1602	45.0259	44.8116
792	16.347	11.6092	7.10072	15.4478	9.21009	9.73385	9.11458	16.248	10.5744	14.4507	13.586	22.6858	25.0625	30.6265	14.7639	14.3893	38.0334	38.631	29.8928	22.4441	14.5055	10.1239	14.2013	19.1761	10.6031	51.1152	26.4772	30.9068	14.2387	14.0996	25.8541	31.9508	19.5407	20.0869	19.8186	20.3641	30.0155	44.707	44.273
793	16.3503	11.6127	7.09357	15.3974	9.20475	9.7232	9.1136	16.2419	10.5737	14.4399	13.5686	22.6615	25.0318	30.612	14.7497	14.4191	37.9316	38.566	29.8734	22.4258	14.4826	10.1203	14.175	19.1423	10.588	50.7727	26.4292	30.8379	14.2256	14.1597	25.7566	31.9056	19.5331	20.0587	19.8004	20.3152	29.8628	44.3747	43.7282
794	16.3213	11.5832	7.08691	15.3372	9.19858	9.71289	9.11185	16.2354	10.5745	14.4262	13.5556	22.6396	25.0057	30.5934	14.7331	14.4157	37.8381	38.4881	29.8486	22.4088	14.4907	10.1151	14.1527	19.1384	10.5828	50.4296	26.3721	30.7636	14.2124	14.1384	25.7245	31.8728	19.5278	20.0226	19.7809	20.2653	29.6948	44.0118	43.1607
795	16.263	11.519	7.08028	15.2621	9.19384	9.70319	9.10976	16.228	10.575	14.4113	13.5405	22.6173	24.9797	30.577	14.7167	14.3825	37.7502	38.4108	29.8234	22.3926	14.4985	10.1102	14.1314	19.1351	10.5763	50.1019	26.3167	30.6902	14.2026	14.0561	25.7171	31.8381	19.5229	19.9878	19.7654	20.2165	29.5345	43.6639	42.617
796	16.1986	11.4436	7.07304	15.1769	9.19075	9.69381	9.10782	16.2198	10.5747	14.3968	13.522	22.5937	24.951	30.5642	14.7019	14.342	37.6671	38.3403	29.7999	22.3766	14.4897	10.1059	14.1096	19.1172	10.5642	49.7907	26.2692	30.6221	14.1941	13.9659	25.7079	31.7944	19.5172	19.9599	19.7546	20.1692	29.4021	43.3698	42.1612
797	16.1703	11.4095	7.06358	15.0979	9.18652	9.68366	9.10663	16.2129	10.5752	14.3848	13.5071	22.5719	24.9182	30.55	14.6879	14.3413	37.5926	38.275	29.7761	22.3603	14.4682	10.1003	14.0879	19.0879	10.5529	49.4716	26.2296	30.5613	14.1753	13.9594	25.6899	31.7434	19.5106	19.9404	19.7419	20.1233	29.2902	43.1291	41.7954
798	16.121	11.3565	7.0568	15.0006	9.18373	9.67294	9.10488	16.2055	10.5748	14.3736	13.4918	22.5499	24.8891	30.5337	14.6699	14.3193	37.5066	38.1903	29.7508	22.3435	14.4384	10.0941	14.065	19.0509	10.5376	49.2219	26.2016	30.5048	14.1581	13.9032	25.6752	31.6931	19.5047	19.9156	19.7286	20.0765	29.1163	42.8362	41.3365
799	16.054	11.293	7.05171	14.8926	9.18084	9.66251	9.10094	16.1965	10.574	14.3626	13.4772	22.5284	24.8626	30.5151	14.6487	14.2804	37.4156	38.0834	29.7244	22.3268	14.4093	10.0857	14.0433	19.0147	10.5229	49.1011	26.1824	30.4479	14.1424	13.8102	25.6808	31.6519	19.4981	19.8849	19.712	20.0264	28.8381	42.4393	40.7087
800	16.0064	11.2577	7.04549	14.799	9.17543	9.65348	9.09414	16.186	10.5736	14.3511	13.4655	22.5085	24.8345	30.4945	14.6279	14.2583	37.34	37.966	29.6973	22.3126	14.3927	10.074	14.0263	18.99	10.5153	49.1426	26.1661	30.3871	14.1242	13.7574	25.7228	31.6274	19.4884	19.8539	19.6897	19.9781	28.5515	42.0598	40.1067
801	16.0117	11.2977	7.04214	14.7647	9.17323	9.64536	9.09303	16.1792	10.5746	14.3378	13.4521	22.4879	24.8046	30.4742	14.6122	14.2946	37.306	37.8777	29.6664	22.3103	14.4019	10.0689	14.0088	18.9818	10.5045	49.2323	26.1491	30.3334	14.106	13.8286	25.7831	31.6151	19.4817	19.8301	19.6733	19.9443	28.4888	41.9905	39.9927
802	16.0078	11.3373	7.04119	14.7765	9.17024	9.63805	9.09355	16.1754	10.5755	14.3246	13.4391	22.469	24.7761	30.4591	14.6006	14.3287	37.3088	37.8282	29.6379	22.326	14.4347	10.0711	13.9914	18.9897	10.497	49.3249	26.1381	30.292	14.0915	13.88	25.8438	31.6149	19.4746	19.813	19.6616	19.9172	28.7612	42.3374	40.5578
803	15.9529	11.3291	7.04237	14.8191	9.16467	9.63162	9.09238	16.1726	10.576	14.3125	13.4278	22.4527	24.7511	30.4518	14.5905	14.3217	37.3334	37.8068	29.6172	22.3569	14.4829	10.0792	13.975	19.0086	10.4968	49.4131	26.1393	30.263	14.0831	13.8218	25.8982	31.6247	19.4653	19.8014	19.6532	19.888	29.187	42.8826	41.4493
804	15.8894	11.3233	7.04789	14.8939	9.16378	9.62649	9.09233	16.1667	10.5782	14.2999	13.4142	22.4344	24.7275	30.4496	14.5785	14.3125	37.3529	37.7649	29.604	22.3815	14.5311	10.0915	13.9589	19.0252	10.4969	49.5537	26.155	30.2337	14.0803	13.7482	25.9652	31.6342	19.4599	19.7968	19.6492	19.8514	29.5257	43.3409	42.2028
805	15.8865	11.3963	7.05305	15.0102	9.16274	9.62153	9.09165	16.1622	10.5806	14.2893	13.4036	22.4184	24.7058	30.4494	14.5684	14.3653	37.3802	37.7228	29.5907	22.4055	14.5772	10.1019	13.9448	19.0385	10.4939	49.7476	26.1725	30.2143	14.0762	13.8157	26.0418	31.6488	19.4545	19.7972	19.6504	19.8225	29.7596	43.6687	42.762
806	15.9496	11.5457	7.05761	15.1521	9.16015	9.61715	9.09114	16.1587	10.5828	14.2801	13.3951	22.4044	24.685	30.4508	14.563	14.4819	37.4245	37.71	29.5763	22.4282	14.6212	10.1111	13.9315	19.0491	10.4888	49.9779	26.1879	30.2092	14.0695	14.0348	26.1279	31.6711	19.4482	19.805	19.6594	19.8019	29.937	43.9271	43.2091
807	16.0265	11.7042	7.0646	15.2843	9.15707	9.61492	9.09341	16.1526	10.5857	14.2701	13.3833	22.3882	24.6637	30.4553	14.5642	14.6128	37.4929	37.7655	29.5657	22.445	14.6652	10.1245	13.9155	19.0593	10.4862	50.2115	26.2047	30.2191	14.0638	14.2941	26.2247	31.7019	19.4424	19.826	19.6803	19.7853	30.0834	44.1538	43.5898
808	16.0802	11.8398	7.06962	15.4015	9.15381	9.61361	9.09334	16.1502	10.5873	14.2615	13.3755	22.3743	24.639	30.4666	14.5646	14.7292	37.565	37.8786	29.5601	22.4624	14.703	10.1361	13.9003	19.064	10.479	50.4363	26.2183	30.2351	14.0627	14.5139	26.3216	31.7308	19.4354	19.8527	19.7067	19.7622	30.1829	44.3431	43.8809
809	16.1117	11.949	7.07452	15.5031	9.15204	9.6125	9.09202	16.149	10.5885	14.253	13.3686	22.3609	24.6163	30.4808	14.5636	14.824	37.6256	38.013	29.555	22.4792	14.7317	10.1471	13.8836	19.0617	10.4705	50.6348	26.2273	30.2477	14.0588	14.6842	26.4142	31.7518	19.4276	19.8775	19.7314	19.732	30.249	44.4812	44.086
810	16.13	12.0382	7.08102	15.5904	9.15266	9.61104	9.09154	16.1456	10.5908	14.2428	13.3583	22.346	24.5994	30.4926	14.5619	14.8993	37.6649	38.13	29.5456	22.4929	14.7504	10.1594	13.8633	19.0526	10.4647	50.7939	26.2313	30.2488	14.0463	14.8182	26.4992	31.7624	19.42	19.8945	19.7492	19.7036	30.2926	44.5755	44.2233
811	16.1344	12.1053	7.08293	15.6596	9.15242	9.60931	9.09065	16.1421	10.5949	14.2333	13.3473	22.3326	24.5767	30.4992	14.5576	14.9579	37.6855	38.2172	29.5344	22.5018	14.7611	10.1689	13.8439	19.0394	10.4582	50.9152	26.2303	30.2371	14.0398	14.9161	26.571	31.7648	19.4147	19.906	19.7634	19.6883	30.3224	44.6418	44.3162
812	16.1313	12.1593	7.08348	15.711	9.15111	9.60577	9.09331	16.1374	10.5963	14.2235	13.3385	22.3202	24.5528	30.5013	14.5518	15.0081	37.6945	38.2783	29.5192	22.5077	14.7651	10.1755	13.8231	19.0225	10.4471	51.0016	26.2262	30.2168	14.0287	14.9967	26.6243	31.7605	19.4078	19.9102	19.7731	19.6777	30.3358	44.6805	44.3581
813	16.1302	12.214	7.08509	15.7512	9.149	9.60137	9.09767	16.1321	10.5954	14.2128	13.3311	22.3074	24.5304	30.501	14.5457	15.0605	37.6963	38.3184	29.5012	22.5121	14.7657	10.1797	13.8004	19.0028	10.4329	51.0593	26.2187	30.1918	14.0116	15.0831	26.6621	31.7518	19.399	19.9088	19.779	19.6679	30.337	44.7008	44.3699
814	16.142	12.2912	7.08903	15.7954	9.14671	9.60109	9.09251	16.1302	10.5999	14.2017	13.3188	22.2906	24.5088	30.5021	14.5396	15.1298	37.6913	38.3424	29.487	22.5161	14.77	10.1837	13.7785	18.9813	10.4257	51.0992	26.2039	30.1663	14.0016	15.2045	26.6986	31.7419	19.3941	19.9091	19.7858	19.6565	30.3365	44.7174	44.3838
815	16.1612	12.3837	7.08811	15.8484	9.14438	9.59797	9.09199	16.1278	10.603	14.1908	13.3085	22.2755	24.4853	30.4986	14.5308	15.215	37.685	38.3602	29.468	22.5215	14.7746	10.1878	13.7575	18.961	10.4139	51.1257	26.1909	30.1352	13.9875	15.3546	26.7354	31.73	19.3852	19.9058	19.7866	19.6429	30.3567	44.7557	44.4508
816	16.1815	12.482	7.0855	15.9091	9.14125	9.5917	9.09245	16.1227	10.603	14.181	13.2991	22.2612	24.46	30.4923	14.5211	15.3075	37.6766	38.3741	29.4466	22.5262	14.7792	10.1915	13.7363	18.9422	10.3996	51.1468	26.177	30.1002	13.9717	15.5151	26.7727	31.7166	19.3747	19.9005	19.7837	19.626	30.4033	44.8213	44.5708
817	16.1962	12.574	7.08762	15.9715	9.13677	9.58506	9.08509	16.1143	10.6008	14.1723	13.2869	22.2448	24.4344	30.4878	14.5131	15.3932	37.6628	38.3838	29.4285	22.5278	14.7841	10.1944	13.7131	18.9238	10.3888	51.1699	26.1559	30.0654	13.9608	15.6597	26.8088	31.7028	19.3676	19.8967	19.7825	19.6066	30.4654	44.9068	44.7293
818	16.198	12.6476	7.08769	16.0275	9.13562	9.58266	9.08287	16.1109	10.6039	14.1596	13.2773	22.2306	24.4078	30.4825	14.502	15.4612	37.649	38.3987	29.4071	22.5364	14.7892	10.1979	13.6893	18.9022	10.3746	51.1863	26.1372	30.0301	13.9466	15.7717	26.8426	31.6889	19.3568	19.8893	19.7823	19.5861	30.5216	44.9958	44.9002
819	16.1889	12.705	7.0864	16.074	9.13334	9.57906	9.08198	16.1082	10.6049	14.147	13.2674	22.2161	24.3838	30.4755	14.4905	15.513	37.6359	38.4196	29.3849	22.5419	14.7926	10.2008	13.6669	18.8799	10.3599	51.1931	26.1187	29.9958	13.9295	15.8517	26.8723	31.6735	19.3455	19.8835	19.7822	19.5623	30.5819	45.0866	45.0762
820	16.1712	12.7518	7.08418	16.1113	9.12768	9.57086	9.07919	16.1028	10.5997	14.1364	13.2551	22.1993	24.3627	30.467	14.4806	15.554	37.6226	38.4433	29.3631	22.5392	14.7933	10.202	13.6461	18.8583	10.3475	51.1903	26.0984	29.962	13.9112	15.908	26.8971	31.6564	19.3357	19.8813	19.7806	19.5381	30.6389	45.1742	45.2476
821	16.1515	12.7955	7.07808	16.1442	9.12488	9.56222	9.07849	16.096	10.5977	14.122	13.2405	22.1813	24.3371	30.4602	14.4697	15.5932	37.6057	38.4613	29.3379	22.5426	14.7924	10.2024	13.6218	18.834	10.3371	51.1813	26.0771	29.9206	13.8948	15.9579	26.9188	31.6416	19.3225	19.8721	19.7759	19.5149	30.6861	45.2542	45.4058
822	16.1303	12.8376	7.07476	16.1734	9.11922	9.55525	9.07186	16.0882	10.5973	14.108	13.2278	22.1628	24.3116	30.4517	14.4595	15.6309	37.5871	38.4722	29.3151	22.5381	14.7889	10.2005	13.5948	18.8075	10.3218	51.1734	26.0566	29.881	13.8769	16.0054	26.9385	31.6216	19.3097	19.8654	19.7704	19.4878	30.7275	45.3214	45.54
823	16.1086	12.8795	7.07281	16.2008	9.11201	9.54915	9.06314	16.0806	10.5976	14.0951	13.2167	22.1439	24.2875	30.4413	14.4488	15.6674	37.5667	38.4762	29.2937	22.5282	14.7834	10.1979	13.5684	18.7807	10.3034	51.1677	26.0362	29.844	13.8578	16.0519	26.9594	31.5982	19.298	19.8609	19.7652	19.4605	30.7638	45.3823	45.6687
824	16.0822	12.9217	7.06525	16.2289	9.10926	9.54089	9.06413	16.0748	10.5977	14.082	13.204	22.1244	24.2637	30.4303	14.4341	15.702	37.5432	38.4746	29.268	22.5269	14.7778	10.199	13.5476	18.7571	10.2904	51.1595	26.0129	29.8037	13.8402	16.096	26.9854	31.5799	19.286	19.8517	19.7602	19.4342	30.8029	45.4456	45.8107
825	16.0565	12.9582	7.05911	16.2535	9.10426	9.53399	9.05946	16.0663	10.5933	14.0681	13.1922	22.1077	24.2352	30.4214	14.4214	15.7314	37.5195	38.4699	29.2419	22.525	14.7743	10.1991	13.5234	18.7305	10.2784	51.1426	25.9902	29.7615	13.8209	16.1293	27.0061	31.5603	19.2746	19.8407	19.7527	19.4083	30.8584	45.5216	45.9846
826	16.0271	12.9882	7.05494	16.2728	9.09694	9.52794	9.05165	16.057	10.5894	14.055	13.1808	22.0923	24.2078	30.4121	14.4094	15.7557	37.4952	38.466	29.2167	22.5224	14.7704	10.1982	13.4967	18.7027	10.2622	51.1214	25.9669	29.7183	13.8004	16.1507	27.0239	31.5396	19.2629	19.829	19.7454	19.381	30.9133	45.6019	46.1652
827	15.991	13.012	7.05155	16.2865	9.08903	9.52106	9.04625	16.0493	10.5901	14.0432	13.169	22.076	24.1865	30.3999	14.3959	15.7752	37.4687	38.4639	29.1923	22.5205	14.7639	10.1971	13.4703	18.6759	10.2402	51.0992	25.942	29.6751	13.7802	16.1612	27.0428	31.5182	19.2504	19.8173	19.74	19.3535	30.9578	45.6734	46.3288
828	15.9511	13.0277	7.0469	16.2972	9.08322	9.51011	9.04456	16.0423	10.5883	14.0269	13.1562	22.0595	24.1638	30.3887	14.3835	15.7873	37.4374	38.4524	29.1679	22.5195	14.7583	10.1966	13.4455	18.6477	10.2251	51.0653	25.9206	29.6306	13.7607	16.1592	27.0589	31.4925	19.2383	19.8081	19.7283	19.3272	30.9881	45.7251	46.4577
829	15.9118	13.041	7.04192	16.31	9.07872	9.50216	9.04095	16.0351	10.5846	14.0117	13.1444	22.0453	24.1414	30.3751	14.3704	15.7963	37.4056	38.4417	29.1413	22.5151	14.753	10.1954	13.4213	18.62	10.2073	51.0314	25.8958	29.5859	13.7419	16.1522	27.074	31.4689	19.2259	19.7967	19.7174	19.301	31.0166	45.7575	46.5539
830	15.874	13.0576	7.03684	16.3266	9.0742	9.49681	9.03439	16.0274	10.5809	13.9988	13.1337	22.0322	24.1197	30.3596	14.3567	15.8071	37.3749	38.434	29.113	22.5066	14.7468	10.1929	13.3972	18.5931	10.1866	51	25.8663	29.5415	13.7226	16.1486	27.0874	31.4482	19.2133	19.7828	19.7092	19.2746	31.038	45.7816	46.6321
831	15.8405	13.0839	7.03075	16.3457	9.06773	9.48344	9.02989	16.0205	10.5807	13.9829	13.1218	22.0137	24.0975	30.3488	14.3445	15.8249	37.3428	38.4195	29.0871	22.4978	14.7378	10.1893	13.3735	18.5649	10.1751	50.9612	25.8383	29.4971	13.6995	16.1583	27.0951	31.4239	19.202	19.7729	19.6984	19.2481	31.0508	45.8016	46.6996
832	15.8068	13.1103	7.02486	16.3644	9.06117	9.47768	9.02396	16.0116	10.5788	13.9708	13.1114	21.9978	24.073	30.3364	14.3326	15.8432	37.312	38.4113	29.0611	22.4962	14.7295	10.1881	13.349	18.5359	10.1591	50.9247	25.8132	29.4533	13.6752	16.1723	27.1023	31.4001	19.1888	19.762	19.6869	19.2221	31.0595	45.8133	46.7545
833	15.7705	13.1344	7.01991	16.3796	9.05611	9.47399	9.01784	16.0027	10.5754	13.9588	13.1013	21.983	24.0498	30.3222	14.3195	15.8607	37.2797	38.4047	29.0353	22.4949	14.7215	10.1876	13.3241	18.5058	10.1398	50.8884	25.7883	29.408	13.6535	16.1817	27.1097	31.3758	19.1754	19.7505	19.6758	19.1968	31.0705	45.8165	46.7967
834	15.7291	13.1558	7.01604	16.3891	9.05315	9.46208	9.01356	15.9964	10.5731	13.9408	13.0897	21.9653	24.0319	30.3086	14.3048	15.8769	37.2421	38.3903	29.0103	22.4842	14.712	10.185	13.2999	18.4744	10.1231	50.8469	25.7599	29.3596	13.6374	16.1797	27.1162	31.3497	19.1645	19.7401	19.6658	19.1709	31.0809	45.8134	46.8241
835	15.6882	13.1731	7.01051	16.3979	9.04645	9.45629	9.0065	15.9881	10.5748	13.9267	13.0807	21.9532	24.0091	30.2968	14.2912	15.8878	37.2051	38.3765	28.9856	22.4794	14.7014	10.1818	13.2761	18.4447	10.1052	50.8035	25.7347	29.3142	13.6162	16.1754	27.1202	31.3287	19.1525	19.7261	19.6565	19.1437	31.0853	45.8064	46.8359
836	15.646	13.1857	7.00477	16.4047	9.03935	9.44979	8.99939	15.9792	10.5761	13.9145	13.0731	21.941	23.9853	30.2848	14.279	15.8942	37.1667	38.3613	28.9594	22.4728	14.6913	10.1811	13.2517	18.4174	10.0865	50.7566	25.7087	29.2696	13.5929	16.1655	27.1233	31.306	19.1416	19.7119	19.646	19.1177	31.0845	45.7968	46.8408
837	15.6032	13.1949	6.99982	16.409	9.03438	9.43978	8.99443	15.9712	10.5742	13.9021	13.0651	21.9257	23.9642	30.2714	14.2669	15.8978	37.1259	38.3433	28.9321	22.4613	14.6822	10.1825	13.227	18.3913	10.0677	50.7047	25.6802	29.2236	13.5714	16.1485	27.1262	31.2784	19.132	19.6997	19.6329	19.0929	31.0839	45.7796	46.8409
838	15.5574	13.2063	6.99463	16.4145	9.03073	9.43661	8.99161	15.9633	10.5695	13.89	13.0539	21.9119	23.946	30.257	14.2517	15.9013	37.0857	38.3244	28.909	22.457	14.673	10.1778	13.2037	18.3609	10.0496	50.6477	25.6545	29.1746	13.555	16.1296	27.1282	31.2523	19.119	19.6873	19.6177	19.0689	31.0844	45.7547	46.836
839	15.5121	13.2143	6.99185	16.4173	9.02744	9.43196	8.98995	15.9554	10.5681	13.8746	13.0449	21.9013	23.9292	30.243	14.2382	15.9042	37.0461	38.3032	28.8847	22.4538	14.6649	10.1742	13.1814	18.3315	10.0304	50.5893	25.6282	29.1261	13.5336	16.1125	27.1296	31.2287	19.1063	19.6742	19.6044	19.045	31.0786	45.7316	46.8239
840	15.4664	13.2208	6.99041	16.4178	9.02296	9.4252	8.98755	15.9481	10.5692	13.8586	13.0378	21.8922	23.9117	30.2294	14.2262	15.9058	37.005	38.2809	28.8592	22.4476	14.6566	10.1731	13.16	18.3035	10.0117	50.5305	25.602	29.0783	13.5107	16.0946	27.1307	31.2056	19.0954	19.6608	19.5921	19.0196	31.073	45.7091	46.8079
841	15.4197	13.2316	6.98706	16.4186	9.01589	9.41958	8.9822	15.9424	10.5678	13.8481	13.0288	21.8809	23.8914	30.2153	14.2121	15.9051	36.959	38.2602	28.8356	22.4353	14.6457	10.173	13.1388	18.275	9.99654	50.4706	25.5783	29.0303	13.497	16.0698	27.1318	31.1792	19.0859	19.6484	19.5779	18.994	31.069	45.686	46.7905
842	15.3739	13.2391	6.98141	16.4185	9.01212	9.41196	8.97744	15.9342	10.5681	13.8362	13.021	21.8712	23.8736	30.2003	14.1989	15.9041	36.9153	38.2417	28.8118	22.4304	14.6359	10.169	13.1164	18.2449	9.97756	50.4118	25.5521	28.9856	13.4794	16.0473	27.1361	31.1563	19.0766	19.6364	19.5676	18.9704	31.0653	45.6603	46.7732
843	15.3273	13.2461	6.97618	16.4193	9.00917	9.40407	8.97259	15.9262	10.5666	13.8235	13.017	21.8613	23.8561	30.1866	14.187	15.902	36.8721	38.2213	28.7866	22.4261	14.6271	10.1655	13.0934	18.2143	9.95707	50.3489	25.5244	28.9396	13.4589	16.0231	27.1388	31.1332	19.0666	19.6237	19.5557	18.9468	31.0578	45.6284	46.7501
844	15.2811	13.2551	6.97346	16.4218	9.00466	9.3976	8.96758	15.9203	10.5614	13.8119	13.0162	21.8502	23.8375	30.1748	14.1756	15.8988	36.8272	38.1963	28.7604	22.4164	14.619	10.166	13.0711	18.1855	9.93805	50.2796	25.4966	28.8898	13.4386	15.994	27.1371	31.1069	19.0561	19.61	19.5386	18.9233	31.0479	45.5959	46.7244
845	15.2335	13.2612	6.97121	16.4208	9.00218	9.39122	8.96739	15.9118	10.5612	13.8018	13.0064	21.8444	23.8241	30.1583	14.1623	15.8974	36.7837	38.1705	28.7363	22.411	14.6129	10.1661	13.0516	18.1618	9.91937	50.2144	25.4672	28.8461	13.4192	15.9694	27.1386	31.083	19.0479	19.5983	19.5273	18.9001	31.0375	45.5651	46.6981
846	15.1862	13.2681	6.96989	16.4212	8.99878	9.38516	8.96506	15.9051	10.5652	13.789	12.9999	21.8378	23.8123	30.142	14.1492	15.8961	36.7392	38.1443	28.7124	22.4026	14.6048	10.1674	13.0315	18.1356	9.90471	50.1466	25.4394	28.7998	13.3987	15.9427	27.1399	31.0615	19.039	19.5855	19.5138	18.8787	31.0274	45.528	46.6695
847	15.1389	13.2763	6.96889	16.4231	8.99495	9.38063	8.96126	15.9013	10.5694	13.7741	12.9976	21.8293	23.8005	30.1282	14.1371	15.8943	36.6931	38.1174	28.689	22.393	14.595	10.1673	13.0103	18.1059	9.89146	50.0761	25.4136	28.7492	13.3786	15.9128	27.1404	31.0394	19.0294	19.5708	19.4968	18.856	31.0185	45.4935	46.6395
848	15.0904	13.2836	6.9666	16.4218	8.99444	9.37976	8.9641	15.898	10.5667	13.7623	12.9892	21.8231	23.789	30.1166	14.1253	15.8924	36.646	38.0887	28.6688	22.3922	14.5886	10.1591	12.9899	18.0778	9.87088	50.0088	25.3876	28.6995	13.3641	15.8841	27.142	31.0115	19.0212	19.5567	19.4821	18.8327	31.0079	45.46	46.6074
849	15.0418	13.2903	6.96232	16.421	8.99175	9.37521	8.96061	15.8927	10.5671	13.7524	12.9827	21.815	23.7746	30.1046	14.1123	15.8858	36.6013	38.0644	28.6441	22.3885	14.5815	10.1605	12.9698	18.0528	9.85331	49.9382	25.3621	28.6525	13.3457	15.8537	27.1437	30.9874	19.0126	19.5461	19.47	18.8111	30.9916	45.4212	46.5714
850	14.9939	13.2934	6.9588	16.4204	8.98788	9.36998	8.95493	15.8865	10.5686	13.7423	12.9802	21.8062	23.7605	30.0914	14.0992	15.8769	36.557	38.0412	28.6193	22.3824	14.5732	10.1647	12.9509	18.0269	9.83848	49.8654	25.334	28.6071	13.3251	15.8197	27.1459	30.9654	19.0048	19.5355	19.4583	18.7894	30.9795	45.3861	46.5343
851	14.9444	13.291	6.95856	16.4186	8.98497	9.3682	8.95376	15.8816	10.5678	13.7303	12.9807	21.7993	23.7503	30.0769	14.0878	15.8688	36.5103	38.0141	28.5998	22.3776	14.5643	10.1614	12.9337	17.9966	9.82285	49.7931	25.3013	28.5611	13.3062	15.7803	27.1486	30.9414	18.9991	19.5208	19.4444	18.7681	30.9684	45.3467	46.4933
852	14.8914	13.2899	6.95725	16.4147	8.98041	9.36336	8.95067	15.8776	10.5691	13.7168	12.9768	21.7962	23.7397	30.0619	14.0791	15.857	36.4628	37.9847	28.5771	22.3731	14.5569	10.161	12.9164	17.9681	9.80178	49.7206	25.273	28.5129	13.288	15.7346	27.1474	30.9156	18.9924	19.5066	19.4291	18.7473	30.9544	45.2984	46.4457
853	14.837	13.2867	6.95524	16.41	8.97901	9.36033	8.94689	15.8727	10.5702	13.7066	12.9737	21.7936	23.7291	30.0488	14.069	15.8411	36.4153	37.9571	28.5553	22.3681	14.5477	10.1616	12.8968	17.9407	9.78233	49.644	25.2472	28.4634	13.2685	15.6867	27.1453	30.891	18.9847	19.4932	19.4124	18.7263	30.9365	45.2512	46.3905
854	14.7818	13.2799	6.95304	16.4044	8.98025	9.35978	8.94365	15.8667	10.5703	13.6989	12.9726	21.7891	23.7187	30.0374	14.0566	15.823	36.3674	37.9322	28.5359	22.3617	14.5364	10.1613	12.8756	17.9136	9.76739	49.5638	25.2204	28.4143	13.2479	15.6383	27.1429	30.8675	18.977	19.4801	19.3959	18.7047	30.9167	45.1995	46.328
855	14.7302	13.2713	6.95106	16.394	8.97431	9.35469	8.94196	15.8621	10.5707	13.6845	12.9678	21.782	23.7078	30.024	14.045	15.8083	36.3173	37.9055	28.5149	22.3533	14.5285	10.1593	12.8585	17.8866	9.75276	49.488	25.1875	28.3687	13.2298	15.588	27.1367	30.841	18.9726	19.4651	19.385	18.6831	30.8958	45.1413	46.2582
856	14.6733	13.2572	6.94748	16.3793	8.97178	9.35206	8.9364	15.8563	10.5736	13.6736	12.9622	21.7755	23.6969	30.0108	14.032	15.7872	36.2671	37.8765	28.4953	22.347	14.5148	10.1597	12.84	17.8546	9.73676	49.4085	25.1549	28.3202	13.2108	15.5274	27.1237	30.8125	18.9664	19.4519	19.3702	18.663	30.8736	45.0764	46.1805
857	14.6116	13.2298	6.94165	16.3582	8.97078	9.34808	8.93126	15.8492	10.575	13.6634	12.9588	21.7706	23.6862	29.9981	14.0183	15.7519	36.2142	37.8449	28.4754	22.3421	14.4954	10.1611	12.8211	17.8182	9.71741	49.3222	25.1231	28.2699	13.1921	15.4447	27.101	30.7821	18.9583	19.4387	19.3519	18.6418	30.8455	44.9994	46.0783
858	14.5438	13.177	6.93371	16.3258	8.96547	9.33688	8.93315	15.8418	10.5704	13.6474	12.9596	21.7668	23.6756	29.9851	14.0057	15.6944	36.1546	37.8113	28.4524	22.3354	14.4724	10.1604	12.8045	17.7795	9.69366	49.2272	25.09	28.2217	13.1752	15.3247	27.0642	30.749	18.9502	19.4225	19.3346	18.6196	30.8078	44.9058	45.9451
859	14.4548	13.0783	6.92645	16.2683	8.96179	9.33447	8.93011	15.8372	10.5725	13.6342	12.956	21.7608	23.6638	29.9686	13.9905	15.6045	36.0903	37.7797	28.4307	22.3242	14.4332	10.1566	12.7822	17.736	9.67132	49.1196	25.0536	28.174	13.1536	15.1412	27.0025	30.7099	18.9426	19.4083	19.3182	18.5973	30.7566	44.7869	45.7694
860	14.3464	12.9327	6.91571	16.1872	8.95834	9.33158	8.92526	15.8327	10.5744	13.6234	12.9524	21.7522	23.6537	29.9527	13.9773	15.48	36.0193	37.7475	28.4097	22.3136	14.384	10.1522	12.7597	17.6879	9.65017	48.9916	25.0169	28.1215	13.1318	14.8972	26.8996	30.6649	18.9348	19.3931	19.3022	18.5756	30.6865	44.6228	45.5219
861	14.2306	12.7639	6.90098	16.0923	8.95395	9.32239	8.92115	15.8267	10.5719	13.613	12.9506	21.7427	23.6453	29.9391	13.9675	15.3389	35.9404	37.712	28.3882	22.306	14.3335	10.1492	12.7402	17.6373	9.6288	48.8429	24.981	28.0626	13.1126	14.6302	26.7578	30.6162	18.9265	19.375	19.2856	18.5526	30.5873	44.4098	45.1841
862	14.133	12.6393	6.89218	16.0028	8.94986	9.31572	8.91468	15.8199	10.5725	13.5983	12.9425	21.7387	23.6302	29.9197	13.9532	15.2354	35.8542	37.6732	28.3635	22.2951	14.2905	10.1481	12.7181	17.5897	9.60454	48.6879	24.942	28.0066	13.0912	14.4357	26.613	30.5689	18.9196	19.3563	19.2657	18.5288	30.4626	44.1674	44.781
863	14.0741	12.6017	6.88312	15.9473	8.94686	9.30905	8.90741	15.8121	10.5738	13.584	12.9346	21.7336	23.6162	29.9007	13.938	15.2053	35.7757	37.6281	28.3389	22.2817	14.2566	10.1442	12.7	17.5463	9.58227	48.5375	24.9009	27.9507	13.0694	14.3767	26.5107	30.5233	18.9127	19.3361	19.2435	18.5071	30.3314	43.9388	44.3821
864	14.0489	12.6435	6.87475	15.927	8.94394	9.30187	8.90254	15.8041	10.5744	13.5707	12.9303	21.727	23.6062	29.883	13.9225	15.2402	35.7092	37.5767	28.3162	22.2667	14.2365	10.1381	12.6849	17.5129	9.56251	48.3965	24.8579	27.8947	13.0474	14.434	26.4733	30.4823	18.9063	19.3143	19.2205	18.481	30.2582	43.8051	44.1608
865	14.0336	12.7159	6.87185	15.9233	8.93899	9.29476	8.90365	15.7979	10.5735	13.5566	12.9306	21.7222	23.5997	29.8651	13.9059	15.2966	35.6512	37.5202	28.2959	22.2521	14.2357	10.1335	12.6671	17.4965	9.54317	48.2646	24.813	27.8394	13.0247	14.5236	26.5013	30.4507	18.9018	19.2918	19.1982	18.454	30.2638	43.7983	44.1788
866	14.0003	12.7623	6.87024	15.9245	8.93293	9.28963	8.89986	15.7894	10.5715	13.5412	12.9312	21.7203	23.5955	29.8473	13.8902	15.3195	35.5909	37.453	28.2746	22.2428	14.2512	10.1329	12.6513	17.4829	9.52564	48.1322	24.7721	27.7836	13.006	14.5558	26.5393	30.427	18.8978	19.2694	19.1758	18.4306	30.3363	43.9008	44.4064
867	13.9446	12.7694	6.86921	15.9271	8.92637	9.28319	8.89223	15.7807	10.5701	13.5261	12.9291	21.7198	23.5914	29.829	13.874	15.3015	35.5271	37.381	28.2532	22.2402	14.2763	10.1337	12.6358	17.4731	9.50802	47.9965	24.7322	27.7277	12.9865	14.5095	26.563	30.4065	18.891	19.2476	19.1519	18.4096	30.4086	43.9998	44.6527
868	13.8707	12.7398	6.86799	15.9303	8.92027	9.27372	8.88443	15.7735	10.5696	13.5124	12.9238	21.7183	23.5854	29.81	13.8569	15.2502	35.4616	37.3128	28.232	22.2425	14.3033	10.1333	12.6197	17.468	9.48981	47.8571	24.6899	27.6717	12.963	14.3926	26.568	30.3848	18.8813	19.2264	19.1268	18.3919	30.457	44.0483	44.8168
869	13.7851	12.6782	6.86339	15.9316	8.917	9.268	8.88087	15.7667	10.5663	13.5004	12.9218	21.7115	23.5775	29.7933	13.8434	15.1728	35.3971	37.2568	28.207	22.2423	14.3241	10.1319	12.6096	17.4571	9.47763	47.7159	24.6462	27.6132	12.9446	14.2289	26.5849	30.3604	18.8783	19.2039	19.1063	18.3754	30.4696	44.0285	44.8532
870	13.7056	12.6311	6.85862	15.9414	8.91219	9.26089	8.87342	15.7597	10.5646	13.4862	12.9192	21.7082	23.5709	29.7774	13.8308	15.1079	35.3431	37.2186	28.1868	22.2413	14.3337	10.1336	12.5988	17.4387	9.46238	47.5831	24.6087	27.5607	12.9274	14.0857	26.6253	30.3369	18.8722	19.1871	19.0902	18.3557	30.4447	43.9513	44.7702
871	13.6461	12.6367	6.85518	15.9672	8.90573	9.2521	8.86368	15.7529	10.5652	13.4709	12.9163	21.7095	23.5668	29.7626	13.8181	15.0863	35.3023	37.1965	28.1713	22.2394	14.3341	10.1371	12.5858	17.4157	9.44325	47.4757	24.5783	27.5169	12.9091	14.0215	26.6907	30.3161	18.8628	19.176	19.0765	18.3388	30.3643	43.8111	44.5453
872	13.6226	12.725	6.8529	16.0134	8.90167	9.24611	8.86263	15.7473	10.565	13.4604	12.9173	21.7098	23.5651	29.7511	13.8055	15.1305	35.2705	37.181	28.1514	22.2348	14.3351	10.1356	12.5743	17.3956	9.42749	47.4164	24.5488	27.4782	12.8892	14.0856	26.7722	30.2979	18.8598	19.163	19.0617	18.324	30.2474	43.6292	44.2316
873	13.6204	12.8558	6.85174	16.0721	8.89646	9.24202	8.86134	15.7404	10.5643	13.444	12.916	21.7118	23.5647	29.7407	13.791	15.2156	35.2401	37.175	28.1333	22.2319	14.3359	10.1342	12.5605	17.3743	9.40673	47.4049	24.5236	27.4392	12.8722	14.2274	26.8523	30.2773	18.857	19.1528	19.0456	18.3085	30.1335	43.4531	43.9338
874	13.6181	12.9828	6.85099	16.13	8.89142	9.23715	8.85651	15.7322	10.5633	13.4256	12.914	21.713	23.5614	29.7313	13.7781	15.3034	35.2093	37.169	28.1189	22.2321	14.3398	10.134	12.5468	17.3548	9.385	47.4241	24.4971	27.4003	12.8559	14.3721	26.9261	30.2572	18.8523	19.1429	19.0294	18.2888	30.0917	43.3898	43.8506
875	13.5971	13.0678	6.8496	16.1753	8.88802	9.22905	8.84846	15.7237	10.5622	13.411	12.9139	21.7109	23.5533	29.7227	13.769	15.3593	35.1776	37.153	28.1072	22.2349	14.3485	10.1347	12.536	17.3393	9.36822	47.4505	24.4646	27.3621	12.8373	14.4536	26.9938	30.2411	18.8459	19.1304	19.0146	18.2704	30.1247	43.4395	43.981
876	13.5588	13.1177	6.84545	16.2111	8.88167	9.21894	8.84736	15.7169	10.5636	13.3917	12.9155	21.7119	23.5493	29.7143	13.7518	15.3853	35.1403	37.1297	28.0906	22.238	14.3546	10.136	12.5226	17.3194	9.35508	47.4651	24.4341	27.3181	12.818	14.4816	27.059	30.2203	18.8432	19.1222	19.0007	18.254	30.2055	43.5624	44.2469
877	13.5204	13.1639	6.84353	16.2447	8.87623	9.21024	8.8451	15.7104	10.5621	13.3791	12.916	21.7118	23.5495	29.7037	13.7373	15.408	35.0998	37.1027	28.0737	22.2408	14.3585	10.1353	12.5105	17.2968	9.33847	47.4674	24.4056	27.2743	12.7997	14.5016	27.1161	30.2006	18.8398	19.1139	18.9865	18.2357	30.277	43.6787	44.4945
878	13.4888	13.2265	6.84485	16.2805	8.87249	9.20473	8.8386	15.7038	10.5583	13.3727	12.9147	21.7112	23.5507	29.6917	13.7279	15.4428	35.0584	37.0761	28.0593	22.2416	14.3605	10.1335	12.5001	17.2749	9.31682	47.4586	24.3771	27.234	12.783	14.5423	27.1622	30.1828	18.8348	19.104	18.9728	18.2152	30.3306	43.7677	44.6902
879	13.4621	13.3102	6.84456	16.3196	8.86621	9.20203	8.83273	15.6983	10.5624	13.3542	12.913	21.718	23.5455	29.6835	13.7127	15.4884	35.0176	37.0553	28.0457	22.2373	14.3598	10.1363	12.4856	17.2594	9.29679	47.4394	24.344	27.1949	12.7675	14.6097	27.1972	30.1591	18.8325	19.0961	18.9627	18.1952	30.3708	43.8348	44.8495
880	13.4356	13.385	6.84152	16.3517	8.86393	9.19935	8.83048	15.6917	10.5598	13.3422	12.914	21.723	23.5473	29.6746	13.7004	15.5358	34.9766	37.0394	28.0325	22.233	14.3568	10.136	12.4762	17.2412	9.27327	47.4052	24.3131	27.156	12.7502	14.6767	27.2269	30.1378	18.8315	19.0866	18.9495	18.1787	30.408	43.8958	45.0041
881	13.4047	13.4429	6.83731	16.3743	8.86371	9.19466	8.82818	15.6843	10.5552	13.3321	12.9146	21.7253	23.5508	29.6649	13.6907	15.5747	34.9325	37.0265	28.0195	22.2306	14.3547	10.1334	12.4678	17.219	9.25397	47.3595	24.2827	27.1161	12.7336	14.7242	27.2501	30.1173	18.8308	19.0745	18.9352	18.1644	30.4489	43.9602	45.1596
882	13.3632	13.4842	6.83454	16.389	8.86081	9.18708	8.82092	15.6773	10.558	13.3137	12.9111	21.727	23.5462	29.6554	13.6807	15.5959	34.883	37.0138	28.0064	22.2302	14.3562	10.1325	12.4537	17.1953	9.24686	47.3083	24.2491	27.0746	12.7211	14.7389	27.2639	30.0931	18.8298	19.0605	18.9237	18.1524	30.482	44.014	45.2916
883	13.3169	13.5033	6.83317	16.4	8.85519	9.18046	8.81625	15.6695	10.5603	13.2995	12.9156	21.7317	23.5495	29.6452	13.6686	15.5986	34.8328	36.9994	27.9917	22.2276	14.3542	10.1359	12.4434	17.1766	9.22777	47.2486	24.2195	27.0353	12.706	14.7248	27.2737	30.0683	18.8283	19.0523	18.9109	18.141	30.5009	44.049	45.39
884	13.2683	13.5091	6.82973	16.4053	8.85023	9.17818	8.81561	15.6634	10.5612	13.2896	12.9217	21.7354	23.5524	29.6351	13.6562	15.5879	34.782	36.9863	27.9775	22.2259	14.3499	10.139	12.4334	17.1562	9.20444	47.1875	24.1908	26.9916	12.6885	14.693	27.2804	30.0449	18.8269	19.0416	18.8974	18.1271	30.5057	44.064	45.4623
885	13.2194	13.5124	6.82443	16.4062	8.8475	9.17872	8.8173	15.6595	10.5622	13.2813	12.9246	21.7374	23.5506	29.6261	13.6446	15.572	34.7302	36.9749	27.9654	22.2262	14.3447	10.1393	12.4217	17.131	9.18513	47.1277	24.1597	26.9427	12.672	14.6556	27.284	30.0223	18.8254	19.0257	18.8838	18.1198	30.4996	44.0575	45.4862
886	13.169	13.5232	6.82648	16.4113	8.84458	9.16977	8.81474	15.6546	10.569	13.2688	12.9261	21.7472	23.5522	29.6198	13.6336	15.5647	34.6784	36.9601	27.9565	22.2251	14.3384	10.1396	12.4103	17.1071	9.17518	47.0611	24.1244	26.902	12.6647	14.6216	27.2838	29.994	18.8228	19.0158	18.8702	18.1122	30.486	44.0301	45.4694
887	13.1248	13.5477	6.82379	16.4158	8.84087	9.16569	8.80858	15.6492	10.5739	13.2519	12.932	21.7524	23.5534	29.6121	13.6208	15.5715	34.6236	36.9376	27.9469	22.2216	14.3338	10.1395	12.4021	17.0863	9.15527	46.9937	24.0901	26.8607	12.6471	14.6113	27.2843	29.9674	18.8201	19.0029	18.8578	18.0972	30.4677	43.9869	45.4306
888	13.0857	13.5893	6.81817	16.4255	8.83683	9.16497	8.80233	15.6434	10.5745	13.2346	12.939	21.7543	23.5549	29.6026	13.6071	15.5924	34.5673	36.9122	27.9355	22.2206	14.33	10.1401	12.3943	17.0659	9.13045	46.9277	24.0567	26.817	12.6243	14.6261	27.2893	29.9435	18.8198	18.9889	18.8446	18.0853	30.4428	43.9457	45.3879
889	13.0493	13.6475	6.81766	16.4488	8.83348	9.15909	8.80081	15.637	10.5711	13.2228	12.9398	21.7605	23.5596	29.5934	13.5949	15.6226	34.5135	36.8924	27.9232	22.2282	14.3248	10.1424	12.3815	17.0412	9.11668	46.8632	24.0219	26.7726	12.6124	14.6559	27.3016	29.9208	18.8245	18.98	18.8285	18.0743	30.4278	43.9169	45.3665
890	13.0164	13.7057	6.81745	16.4682	8.82974	9.15314	8.80012	15.6286	10.573	13.2118	12.9432	21.7691	23.5691	29.5851	13.5844	15.6536	34.4623	36.868	27.9118	22.2297	14.3259	10.1434	12.3745	17.02	9.10009	46.7985	23.9875	26.7344	12.6025	14.6932	27.3195	29.8978	18.8241	18.9703	18.8144	18.0631	30.4278	43.9047	45.3811
891	12.9817	13.7595	6.81628	16.4847	8.82869	9.14934	8.79666	15.6235	10.5763	13.2019	12.9475	21.7785	23.5764	29.5762	13.5733	15.6808	34.4097	36.8392	27.9017	22.2255	14.328	10.1455	12.3689	17.0013	9.0845	46.7343	23.9537	26.6908	12.5909	14.7219	27.3402	29.8743	18.8237	18.9582	18.8023	18.0528	30.4347	43.907	45.4338
892	12.942	13.806	6.81455	16.501	8.83039	9.1475	8.79087	15.6237	10.5779	13.1928	12.9519	21.7876	23.5786	29.5668	13.5606	15.7019	34.3537	36.8103	27.8926	22.2213	14.3281	10.1499	12.3605	16.9841	9.0715	46.67	23.9205	26.6387	12.5762	14.7321	27.362	29.8504	18.8271	18.9442	18.7907	18.043	30.4485	43.9286	45.5213
893	12.9004	13.838	6.81577	16.5172	8.82481	9.1415	8.79415	15.6193	10.5827	13.18	12.9627	21.7958	23.5851	29.5634	13.5504	15.7165	34.2972	36.7907	27.8828	22.2324	14.3344	10.1512	12.351	16.9738	9.04889	46.5999	23.8875	26.6046	12.5628	14.7302	27.3866	29.8252	18.8288	18.9325	18.7756	18.0349	30.4679	43.9616	45.6296
894	12.8567	13.8659	6.8178	16.5315	8.82231	9.14106	8.79463	15.6132	10.583	13.1694	12.9678	21.803	23.5942	29.5569	13.541	15.7246	34.2437	36.7764	27.8744	22.2346	14.3399	10.1561	12.3436	16.9574	9.0332	46.5298	23.8536	26.565	12.5471	14.7214	27.4071	29.8035	18.8303	18.9219	18.7641	18.0285	30.4909	43.9943	45.7411
895	12.8149	13.8938	6.81887	16.5437	8.82339	9.14331	8.79156	15.6079	10.5813	13.1595	12.9697	21.8107	23.6039	29.5477	13.5313	15.7299	34.1926	36.7611	27.8673	22.2299	14.3425	10.1625	12.3385	16.9366	9.02534	46.4599	23.8196	26.5188	12.5317	14.709	27.4246	29.7838	18.8324	18.9118	18.755	18.0173	30.5122	44.0172	45.8407
896	12.7737	13.9222	6.8175	16.5547	8.82205	9.13718	8.79163	15.6061	10.5873	13.1441	12.9806	21.821	23.6121	29.5427	13.5206	15.7386	34.1405	36.7375	27.8598	22.2371	14.3439	10.1624	12.3335	16.9227	9.01491	46.3872	23.7881	26.4798	12.5224	14.695	27.4456	29.7601	18.8353	18.9021	18.7423	18.0042	30.525	44.0342	45.924
897	12.7322	13.9551	6.8162	16.5671	8.82192	9.13414	8.79236	15.603	10.5957	13.1343	12.9865	21.8329	23.618	29.5367	13.5106	15.7511	34.0906	36.7186	27.8536	22.2368	14.3492	10.1635	12.3281	16.9047	8.99005	46.3163	23.7554	26.442	12.5109	14.6948	27.4739	29.7358	18.8387	18.892	18.7297	17.993	30.5297	44.0475	45.9939
898	12.6919	13.9918	6.81673	16.5814	8.82171	9.13139	8.79285	15.5963	10.6016	13.1246	12.9922	21.8458	23.626	29.5311	13.4995	15.7683	34.0404	36.6978	27.8464	22.2345	14.3539	10.1668	12.3237	16.8854	8.96662	46.2457	23.7226	26.4026	12.4974	14.702	27.5049	29.7127	18.8438	18.883	18.7178	17.9876	30.5352	44.0566	46.0598
899	12.655	14.0309	6.81938	16.597	8.81995	9.12599	8.79218	15.5871	10.6022	13.1097	13.0023	21.8586	23.6384	29.5267	13.4867	15.7893	33.9875	36.6703	27.837	22.2375	14.3541	10.1713	12.3208	16.8695	8.95713	46.1742	23.6905	26.361	12.4845	14.7089	27.5349	29.6915	18.8503	18.8752	18.7069	17.977	30.5433	44.0616	46.1225
900	12.6141	14.0733	6.8206	16.612	8.81766	9.12424	8.78843	15.5857	10.6014	13.0982	13.0084	21.8691	23.6492	29.5186	13.4773	15.8101	33.9347	36.6515	27.8307	22.2433	14.3563	10.1761	12.3163	16.8559	8.94214	46.1075	23.6562	26.3227	12.4779	14.7207	27.5716	29.6716	18.8517	18.8622	18.6995	17.9655	30.5515	44.0675	46.1846
901	12.5751	14.1104	6.8201	16.6263	8.81491	9.12581	8.78586	15.584	10.6034	13.0877	13.0172	21.8786	23.6574	29.5107	13.4676	15.828	33.8824	36.6306	27.825	22.249	14.3603	10.1787	12.3101	16.8432	8.92602	46.0329	23.6233	26.2818	12.4667	14.7285	27.6053	29.6495	18.86	18.8506	18.6852	17.9591	30.5569	44.0782	46.2489
902	12.5361	14.1405	6.8198	16.6394	8.81202	9.12684	8.78535	15.5794	10.6078	13.0766	13.0273	21.8885	23.6649	29.5045	13.4567	15.8417	33.8303	36.6072	27.8186	22.2535	14.3648	10.18	12.3037	16.8293	8.91137	45.9538	23.5909	26.2387	12.4499	14.7279	27.6335	29.6252	18.8705	18.8414	18.6681	17.9511	30.5615	44.0881	46.3182
903	12.4924	14.1686	6.82364	16.6505	8.80961	9.12029	8.78449	15.5745	10.6102	13.0636	13.0295	21.9003	23.6756	29.4985	13.4459	15.8511	33.7771	36.5904	27.8116	22.2573	14.3676	10.184	12.3001	16.8123	8.89901	45.8895	23.5542	26.2005	12.4365	14.7192	27.6607	29.6021	18.8631	18.8299	18.6664	17.9424	30.5706	44.0972	46.3886
904	12.45	14.1923	6.82347	16.659	8.81004	9.11762	8.78446	15.5675	10.6091	13.0548	13.0384	21.9171	23.688	29.4926	13.4397	15.8548	33.7212	36.5645	27.807	22.2658	14.3723	10.1875	12.3	16.8	8.87993	45.8174	23.5192	26.1574	12.4223	14.7015	27.6885	29.5776	18.87	18.8167	18.6531	17.9336	30.582	44.1038	46.4543
905	12.406	14.211	6.82094	16.6647	8.80978	9.11442	8.78363	15.5626	10.6105	13.0422	13.0497	21.9323	23.701	29.4882	13.4315	15.8565	33.6664	36.5341	27.8006	22.2698	14.376	10.1899	12.2988	16.7865	8.86046	45.7407	23.4841	26.1123	12.4093	14.6826	27.7166	29.5518	18.8821	18.8028	18.6364	17.925	30.5862	44.1049	46.5074
906	12.3594	14.2271	6.81914	16.6687	8.80537	9.10588	8.78076	15.5626	10.6188	13.0214	13.0559	21.9402	23.7134	29.4859	13.4163	15.8606	33.6151	36.508	27.79	22.2626	14.3761	10.1922	12.2928	16.766	8.84792	45.6667	23.4463	26.0701	12.3998	14.6702	27.7441	29.5255	18.8848	18.7896	18.6285	17.9169	30.5829	44.1054	46.5544
907	12.3193	14.2541	6.81482	16.675	8.80043	9.10488	8.77907	15.5576	10.6199	13.0187	13.0618	21.9505	23.725	29.4816	13.4077	15.8667	33.5565	36.4852	27.789	22.2663	14.3808	10.1957	12.2893	16.7535	8.8356	45.5904	23.4098	26.0292	12.3906	14.6582	27.7702	29.5004	18.8886	18.7791	18.6157	17.9097	30.58	44.1044	46.5997
908	12.2779	14.2853	6.81145	16.6818	8.79722	9.10175	8.77858	15.5509	10.6211	13.01	13.0654	21.9617	23.736	29.4738	13.3975	15.8759	33.498	36.4589	27.7861	22.2752	14.3852	10.2008	12.2869	16.7388	8.8178	45.5142	23.3731	25.9883	12.3767	14.6544	27.7938	29.4738	18.892	18.7703	18.6035	17.903	30.5844	44.1008	46.6469
909	12.2357	14.3173	6.80941	16.6876	8.79553	9.09531	8.77816	15.5441	10.6247	12.9906	13.0692	21.9728	23.7473	29.4647	13.384	15.8887	33.4433	36.4299	27.7776	22.2827	14.3873	10.206	12.2839	16.7203	8.79838	45.4386	23.3361	25.9462	12.3609	14.6594	27.8158	29.4459	18.8951	18.7615	18.5942	17.8909	30.5892	44.1013	46.6981
910	12.1991	14.3517	6.80487	16.6913	8.79213	9.09613	8.77538	15.5365	10.6259	12.9822	13.0819	21.9838	23.761	29.4607	13.3749	15.9051	33.3913	36.4085	27.7696	22.2824	14.3893	10.2069	12.2787	16.7081	8.79337	45.3606	23.3009	25.9012	12.3547	14.664	27.8404	29.4201	18.8994	18.7501	18.5857	17.8818	30.591	44.1023	46.7546
911	12.1595	14.3857	6.80401	16.6921	8.78951	9.09016	8.77137	15.5309	10.6307	12.9705	13.0909	21.9965	23.7703	29.4543	13.3626	15.9213	33.3327	36.3824	27.7647	22.2857	14.387	10.2079	12.2726	16.6915	8.77833	45.2873	23.2626	25.8624	12.3399	14.6661	27.8636	29.3936	18.9056	18.7368	18.5758	17.8773	30.5923	44.1017	46.8126
912	12.1178	14.4173	6.8043	16.6941	8.78742	9.08138	8.7684	15.527	10.6348	12.9565	13.098	22.009	23.7797	29.4474	13.3485	15.9346	33.2714	36.3521	27.7612	22.2908	14.3849	10.2126	12.2685	16.6751	8.75814	45.2114	23.2245	25.8252	12.3235	14.6635	27.8847	29.3669	18.9106	18.7221	18.5618	17.872	30.6006	44.0988	46.8639
913	12.0772	14.4453	6.80127	16.7	8.7845	9.07771	8.76797	15.5229	10.6329	12.944	13.1077	22.0196	23.7945	29.4436	13.3362	15.9437	33.2147	36.3219	27.7565	22.2932	14.3885	10.2222	12.2684	16.6653	8.74446	45.1254	23.1905	25.782	12.3169	14.6556	27.9044	29.3415	18.9127	18.7075	18.5437	17.8635	30.6012	44.0991	46.9167
914	12.0357	14.4659	6.79717	16.6954	8.77755	9.07379	8.76506	15.5126	10.6294	12.9257	13.1123	22.0336	23.8004	29.4384	13.3256	15.9525	33.1611	36.2918	27.7515	22.2993	14.3912	10.2232	12.2654	16.6495	8.72947	45.0482	23.1487	25.7386	12.3058	14.6498	27.9303	29.3175	18.9241	18.6984	18.5354	17.8551	30.5976	44.0987	46.9657
915	11.9928	14.4855	6.79206	16.6903	8.77349	9.07206	8.76021	15.5061	10.6291	12.9087	13.1204	22.0465	23.81	29.4337	13.3146	15.9597	33.1049	36.2612	27.7444	22.3018	14.3943	10.2214	12.2616	16.6312	8.71362	44.9727	23.1098	25.6961	12.2932	14.644	27.951	29.29	18.9322	18.6899	18.5268	17.8498	30.5971	44.094	47.0067
916	11.9496	14.5062	6.78651	16.6892	8.77358	9.0702	8.75497	15.5054	10.633	12.8967	13.1326	22.0579	23.827	29.4291	13.3022	15.9658	33.0447	36.2319	27.7363	22.3012	14.3975	10.2222	12.2583	16.6148	8.69666	44.8945	23.0761	25.6548	12.2804	14.635	27.9658	29.2589	18.9338	18.6783	18.514	17.8438	30.6034	44.09	47.0479
917	11.908	14.5213	6.78198	16.6861	8.76922	9.05682	8.7517	15.4978	10.636	12.8865	13.1346	22.0741	23.8377	29.4204	13.2885	15.9734	32.9875	36.2104	27.733	22.3122	14.3969	10.2289	12.2556	16.6054	8.67571	44.8172	23.0343	25.6144	12.2653	14.6181	27.9922	29.2323	18.9426	18.6622	18.5047	17.8369	30.6069	44.0815	47.0855
918	11.8688	14.5397	6.77893	16.6886	8.76604	9.05021	8.75521	15.494	10.6381	12.8723	13.1456	22.0865	23.8528	29.4133	13.2787	15.9786	32.9307	36.1804	27.7347	22.3171	14.4003	10.2368	12.2573	16.5937	8.66606	44.7383	22.9937	25.5709	12.2496	14.6073	28.0112	29.2047	18.949	18.648	18.4891	17.8293	30.6044	44.0713	47.1214
919	11.8285	14.5586	6.77751	16.6916	8.76327	9.04715	8.75685	15.4888	10.6409	12.8567	13.1594	22.0984	23.8692	29.4085	13.2689	15.9823	32.8738	36.1459	27.7367	22.3192	14.4048	10.2414	12.259	16.5804	8.6595	44.6598	22.9566	25.527	12.2361	14.5993	28.0264	29.177	18.9543	18.635	18.473	17.8216	30.5985	44.0687	47.1619
920	11.7837	14.5726	6.77701	16.6875	8.75845	9.03782	8.74632	15.4747	10.6454	12.845	13.1626	22.116	23.8808	29.405	13.2534	15.9869	32.817	36.1171	27.7332	22.3277	14.4042	10.2403	12.2544	16.5694	8.64092	44.5838	22.9223	25.487	12.2273	14.5857	28.0486	29.1521	18.9625	18.6211	18.4663	17.8196	30.5949	44.0602	47.2009
921	11.7391	14.5914	6.77299	16.6879	8.75409	9.0301	8.7452	15.4713	10.6415	12.8303	13.1669	22.129	23.8987	29.4044	13.2413	15.9939	32.7606	36.083	27.7284	22.3354	14.4051	10.2457	12.2513	16.5569	8.62061	44.4997	22.8829	25.446	12.2205	14.5763	28.0701	29.1245	18.9681	18.6127	18.4588	17.8148	30.595	44.0464	47.2346
922	11.6987	14.6094	6.76879	16.6907	8.75239	9.02246	8.74186	15.4684	10.6389	12.8148	13.1765	22.1407	23.9122	29.4014	13.2314	15.9982	32.6994	36.0534	27.7258	22.3392	14.4084	10.251	12.2508	16.5425	8.6014	44.4178	22.8419	25.4046	12.2104	14.564	28.0894	29.0972	18.9744	18.6036	18.4496	17.803	30.5973	44.0324	47.264
923	11.6615	14.6243	6.76519	16.6931	8.75199	9.01498	8.73208	15.4603	10.642	12.8009	13.1904	22.1535	23.9188	29.3934	13.221	15.9983	32.6346	36.0303	27.7252	22.3395	14.4138	10.2526	12.2517	16.5279	8.58597	44.3414	22.8033	25.3646	12.1963	14.5465	28.1081	29.0723	18.9835	18.5919	18.4394	17.802	30.5954	44.0293	47.3022
924	11.6214	14.6428	6.75518	16.6947	8.74435	9.01297	8.73205	15.4564	10.6406	12.7912	13.198	22.1644	23.9373	29.3835	13.206	16.001	32.58	35.998	27.7181	22.3424	14.4192	10.2562	12.2493	16.5193	8.57984	44.2558	22.7719	25.3297	12.1865	14.5345	28.1338	29.0484	18.9927	18.5869	18.4305	17.8001	30.5969	44.0229	47.3386
925	11.5833	14.6582	6.75456	16.6958	8.73702	9.0109	8.73443	15.4481	10.6415	12.7787	13.2091	22.183	23.953	29.3776	13.196	16.0057	32.5244	35.9631	27.7139	22.3508	14.4202	10.2616	12.2526	16.5099	8.56319	44.1764	22.7338	25.2859	12.1812	14.5248	28.1564	29.0217	19.0047	18.5718	18.4193	17.7937	30.5991	44.0098	47.3713
926	11.5462	14.6733	6.75927	16.6974	8.73184	9.00713	8.73402	15.4366	10.6471	12.7662	13.2208	22.2058	23.9685	29.3746	13.1867	16.0112	32.4631	35.9281	27.712	22.3623	14.4183	10.2697	12.2565	16.4982	8.54273	44.1015	22.6925	25.2407	12.1718	14.5149	28.1764	28.9938	19.0149	18.552	18.4072	17.785	30.593	43.9947	47.4041
927	11.5082	14.6932	6.7568	16.7009	8.72778	9.00225	8.72772	15.4277	10.6572	12.7597	13.226	22.224	23.993	29.3702	13.1692	16.016	32.3956	35.8942	27.7081	22.3719	14.4187	10.2804	12.2507	16.4864	8.53603	44.0218	22.6577	25.2094	12.1491	14.5024	28.1988	28.9688	19.0176	18.5413	18.3969	17.7816	30.5885	43.9862	47.4389
928	11.4698	14.7008	6.75545	16.701	8.72042	9.00146	8.72998	15.4222	10.6632	12.7461	13.2378	22.2442	24.0168	29.3685	13.1594	16.0201	32.3413	35.8567	27.7108	22.3818	14.4303	10.2873	12.254	16.4836	8.52747	43.9347	22.6196	25.1665	12.1527	14.4937	28.2208	28.9446	19.0329	18.526	18.3827	17.7795	30.5846	43.9787	47.4747
929	11.4324	14.7091	6.7531	16.6974	8.71486	8.99953	8.73926	15.4179	10.6664	12.7307	13.2509	22.2654	24.0384	29.365	13.1501	16.027	32.2895	35.8224	27.7133	22.397	14.4397	10.2907	12.2602	16.4803	8.51938	43.8517	22.5804	25.1198	12.1547	14.4882	28.2413	28.9195	19.048	18.5127	18.3709	17.7752	30.5813	43.9673	47.5097
930	11.3946	14.7262	6.74999	16.6925	8.71475	8.99309	8.74703	15.4123	10.6675	12.7186	13.261	22.2843	24.0574	29.3577	13.1367	16.0356	32.2316	35.7919	27.7121	22.415	14.4401	10.2921	12.2622	16.4695	8.51143	43.7771	22.5433	25.077	12.1372	14.4819	28.2602	28.8925	19.0542	18.5053	18.3651	17.7711	30.5864	43.9531	47.5421
931	11.3515	14.7394	6.75651	16.6942	8.71831	8.98551	8.73232	15.4018	10.6607	12.7091	13.2718	22.2934	24.076	29.3517	13.1267	16.0333	32.1722	35.7471	27.7168	22.4161	14.4462	10.2947	12.2564	16.4546	8.49061	43.6934	22.5109	25.0361	12.1246	14.4655	28.2777	28.8633	19.0631	18.4954	18.3589	17.7636	30.5842	43.944	47.575
932	11.3149	14.7522	6.75176	16.6928	8.71894	8.9828	8.71817	15.3987	10.6631	12.6918	13.2799	22.3056	24.086	29.3463	13.1165	16.036	32.1156	35.7079	27.7166	22.4038	14.4492	10.2959	12.2545	16.4395	8.4733	43.6167	22.4736	25.0013	12.1139	14.4503	28.2977	28.8365	19.0732	18.4857	18.3498	17.7575	30.5777	43.9378	47.609
933	11.2771	14.7624	6.73975	16.689	8.71698	8.98052	8.71277	15.398	10.6694	12.6702	13.2883	22.3222	24.0952	29.3402	13.1076	16.0422	32.0585	35.6729	27.7127	22.3952	14.4516	10.2972	12.257	16.4284	8.46138	43.5423	22.4345	24.968	12.1013	14.4361	28.3203	28.8085	19.0834	18.4769	18.3383	17.76	30.5776	43.9276	47.6433
934	11.2303	14.7664	6.73724	16.6888	8.71628	8.96987	8.71562	15.3873	10.6639	12.6553	13.3023	22.3383	24.1175	29.3324	13.1024	16.042	31.9947	35.6305	27.7121	22.4117	14.4611	10.302	12.2589	16.4247	8.44849	43.4565	22.4019	24.9276	12.0835	14.418	28.3434	28.7733	19.093	18.4684	18.3269	17.7584	30.5786	43.916	47.6786
935	11.1932	14.7757	6.7398	16.6875	8.71098	8.96484	8.72004	15.3816	10.6604	12.6406	13.3109	22.3531	24.1281	29.3265	13.088	16.0518	31.9385	35.5962	27.7132	22.4255	14.4693	10.3081	12.2624	16.4159	8.42832	43.3821	22.3642	24.8869	12.0814	14.4067	28.3707	28.7501	19.1044	18.4555	18.3193	17.7566	30.5775	43.9089	47.7177
936	11.1585	14.7876	6.7427	16.6847	8.70817	8.9621	8.72133	15.3785	10.6644	12.6322	13.3233	22.3708	24.1438	29.3251	13.0749	16.0588	31.8845	35.5599	27.7135	22.4384	14.4734	10.3176	12.2632	16.408	8.41418	43.3025	22.3248	24.8473	12.0803	14.3979	28.3994	28.7281	19.1138	18.4393	18.3123	17.7565	30.5745	43.9056	47.7603
937	11.1207	14.7984	6.74235	16.6813	8.71058	8.95768	8.71788	15.374	10.6745	12.6314	13.3428	22.3929	24.1752	29.3269	13.0696	16.0569	31.8273	35.5177	27.7129	22.4519	14.4749	10.3308	12.262	16.4057	8.40939	43.2105	22.2871	24.8087	12.0695	14.3879	28.426	28.7001	19.122	18.4239	18.3027	17.7539	30.5756	43.8912	47.7993
938	11.0868	14.808	6.73734	16.6813	8.70576	8.95158	8.71332	15.3653	10.6742	12.627	13.3492	22.4132	24.206	29.3213	13.0622	16.0673	31.7695	35.491	27.7173	22.4547	14.4828	10.3418	12.2749	16.406	8.38327	43.1344	22.2491	24.7677	12.0601	14.3797	28.4458	28.6797	19.1462	18.418	18.2881	17.7509	30.5777	43.8817	47.8355
939	11.0523	14.8173	6.73518	16.6805	8.70232	8.95127	8.71255	15.3606	10.6784	12.6122	13.3638	22.4339	24.2215	29.314	13.0495	16.0698	31.7104	35.4613	27.7221	22.4611	14.4899	10.3476	12.279	16.4026	8.37519	43.0593	22.2181	24.7281	12.0525	14.3704	28.4729	28.6532	19.1597	18.4027	18.2714	17.7485	30.5796	43.8755	47.8714
940	11.016	14.8266	6.73609	16.6785	8.70183	8.95098	8.71599	15.3584	10.6855	12.5932	13.3816	22.4543	24.2293	29.3079	13.0346	16.0686	31.651	35.4281	27.7258	22.4707	14.4947	10.3503	12.2754	16.3935	8.37862	42.9816	22.1892	24.6888	12.0483	14.359	28.5026	28.6221	19.1639	18.3834	18.2552	17.747	30.5806	43.8655	47.9096
941	10.9774	14.8362	6.7356	16.6773	8.70159	8.93815	8.72098	15.3514	10.685	12.5844	13.3835	22.472	24.2515	29.3038	13.0245	16.0816	31.5937	35.4005	27.7289	22.4758	14.4998	10.3562	12.2802	16.3804	8.3602	42.9038	22.1504	24.6468	12.0479	14.3456	28.52	28.5971	19.1775	18.3787	18.2417	17.7452	30.5804	43.8541	47.9467
942	10.945	14.8447	6.73402	16.6753	8.70028	8.93656	8.73126	15.3468	10.6914	12.575	13.3987	22.4893	24.276	29.3002	13.018	16.088	31.5421	35.3708	27.7296	22.4908	14.5098	10.3601	12.2849	16.3754	8.34721	42.8274	22.1185	24.6178	12.0323	14.3416	28.5427	28.5725	19.1864	18.3623	18.2279	17.7447	30.5819	43.8462	47.9849
943	10.9145	14.8555	6.73195	16.6744	8.69622	8.9347	8.73076	15.3411	10.6978	12.5641	13.4205	22.5096	24.3021	29.2963	13.0112	16.0912	31.4873	35.3404	27.7349	22.5063	14.5195	10.3681	12.289	16.3727	8.34106	42.7486	22.0867	24.5865	12.0206	14.3348	28.5674	28.5504	19.1976	18.3431	18.2111	17.7461	30.5856	43.8414	48.0248
944	10.8796	14.8698	6.73015	16.6756	8.69031	8.92479	8.71314	15.3326	10.6974	12.5521	13.4372	22.5332	24.3274	29.2923	13.0018	16.0965	31.4254	35.3109	27.7462	22.5148	14.5257	10.3818	12.2929	16.3662	8.33575	42.6675	22.05	24.5432	12.0249	14.3188	28.5911	28.5312	19.2154	18.3313	18.1921	17.7475	30.5888	43.8322	48.0641
945	10.8456	14.8807	6.72901	16.6754	8.69066	8.92793	8.70751	15.3309	10.6953	12.5371	13.44	22.552	24.3395	29.2932	12.9942	16.1034	31.3731	35.278	27.7447	22.5272	14.5369	10.3866	12.2962	16.3569	8.31599	42.5978	22.0209	24.5116	12.0175	14.3158	28.6229	28.5053	19.2275	18.3221	18.1813	17.7485	30.5871	43.8244	48.1004
946	10.8116	14.8921	6.73009	16.6751	8.69062	8.93126	8.70818	15.325	10.6965	12.5279	13.4553	22.5681	24.3626	29.2915	12.9846	16.1147	31.3155	35.2479	27.7456	22.5354	14.5445	10.3931	12.302	16.3595	8.29585	42.5238	21.9906	24.4716	12.0166	14.3099	28.6477	28.4805	19.2447	18.3152	18.1761	17.7505	30.5839	43.8195	48.139
947	10.7799	14.9026	6.73353	16.6752	8.68897	8.93038	8.71	15.3164	10.6999	12.5222	13.4768	22.5872	24.3948	29.287	12.9729	16.1253	31.2551	35.2161	27.7528	22.5423	14.5489	10.4012	12.309	16.3677	8.28626	42.4468	21.9564	24.4264	12.02	14.3015	28.6669	28.4593	19.2641	18.3074	18.1735	17.754	30.584	43.8163	48.1841
948	10.7556	14.9082	6.73772	16.6755	8.68799	8.92666	8.70828	15.3146	10.7005	12.5102	13.4768	22.6166	24.4162	29.2842	12.9619	16.1254	31.2052	35.1717	27.762	22.5578	14.5567	10.4042	12.3134	16.3607	8.29371	42.3791	21.9204	24.3942	12.0119	14.3012	28.6933	28.4404	19.2738	18.2941	18.1699	17.7514	30.5888	43.8075	48.2269
949	10.7237	14.9223	6.73043	16.6751	8.68053	8.91835	8.71678	15.3103	10.7048	12.4971	13.4951	22.6337	24.436	29.2792	12.9586	16.1329	31.1525	35.1403	27.7643	22.5699	14.5672	10.4146	12.3209	16.3539	8.28276	42.3014	21.892	24.3634	12.0003	14.2942	28.7143	28.4131	19.2908	18.2946	18.1687	17.7503	30.587	43.7998	48.2678
950	10.6897	14.9322	6.72647	16.6751	8.67895	8.9124	8.72432	15.3056	10.709	12.4842	13.5176	22.6501	24.457	29.2764	12.9547	16.1422	31.0969	35.11	27.7659	22.5754	14.5784	10.4295	12.3294	16.3505	8.26717	42.2229	21.8632	24.3306	11.9936	14.2884	28.7371	28.3859	19.3075	18.2911	18.1674	17.7536	30.5827	43.7953	48.31
951	10.6589	14.9309	6.73628	16.6765	8.6888	8.91245	8.72105	15.3031	10.7105	12.4735	13.5294	22.676	24.4795	29.2769	12.9432	16.1473	31.0418	35.071	27.7735	22.5785	14.5878	10.4432	12.3361	16.3503	8.26118	42.153	21.8273	24.2945	11.9931	14.2893	28.7673	28.3652	19.3178	18.2714	18.164	17.7593	30.5938	43.7917	48.3577
952	10.6306	14.9459	6.74132	16.6779	8.6826	8.90627	8.71491	15.3021	10.7158	12.4733	13.5467	22.6959	24.4967	29.2657	12.9319	16.1573	30.9963	35.0445	27.7861	22.5992	14.5922	10.45	12.3423	16.3495	8.24784	42.0867	21.7903	24.2548	11.9754	14.2797	28.7958	28.3385	19.3342	18.2606	18.1607	17.7574	30.6048	43.7857	48.4018
953	10.5972	14.9604	6.73845	16.6812	8.67916	8.90588	8.71624	15.2948	10.716	12.4646	13.5565	22.7125	24.5232	29.2619	12.9212	16.1629	30.9413	35.0111	27.7932	22.6192	14.6	10.4587	12.3524	16.348	8.24159	42.0086	21.7548	24.2202	11.9754	14.269	28.8219	28.3142	19.3556	18.2534	18.1568	17.7555	30.6049	43.7828	48.4485
954	10.5596	14.9685	6.73151	16.6832	8.68032	8.91063	8.72217	15.2843	10.7145	12.4461	13.5645	22.732	24.5525	29.2655	12.9116	16.1665	30.8787	34.9706	27.7958	22.6335	14.6112	10.4687	12.3626	16.3473	8.2387	41.9264	21.7213	24.1896	11.986	14.2607	28.8484	28.2909	19.3764	18.2492	18.152	17.7608	30.5943	43.7853	48.5016
955	10.5307	14.9737	6.73014	16.6785	8.67522	8.90976	8.71961	15.2817	10.7236	12.4311	13.589	22.762	24.5626	29.262	12.9031	16.1788	30.8259	34.9377	27.8038	22.6473	14.6196	10.4721	12.3627	16.3506	8.2226	41.8654	21.6879	24.1547	11.9687	14.2542	28.8804	28.2608	19.3887	18.2503	18.1474	17.7697	30.602	43.7816	48.5481
956	10.5039	14.9846	6.73305	16.6801	8.67401	8.90045	8.71994	15.2776	10.7309	12.4255	13.6004	22.7762	24.576	29.2642	12.894	16.1879	30.771	34.9115	27.81	22.6571	14.6297	10.4828	12.3682	16.3506	8.22284	41.7959	21.6578	24.1178	11.9636	14.2448	28.9059	28.2384	19.4028	18.242	18.1494	17.7709	30.6095	43.7761	48.5921
957	10.4766	14.9973	6.73326	16.6842	8.67214	8.88704	8.72129	15.2752	10.7328	12.4187	13.603	22.7846	24.5987	29.2666	12.8858	16.1933	30.7188	34.88	27.8159	22.6637	14.6409	10.4905	12.374	16.349	8.21763	41.7207	21.626	24.0799	11.9632	14.2374	28.9316	28.2159	19.4191	18.2294	18.1494	17.7675	30.6102	43.7712	48.6369
958	10.4472	15.0065	6.72782	16.6851	8.66666	8.87721	8.72099	15.2757	10.7301	12.4027	13.6087	22.8017	24.6288	29.2627	12.8793	16.1977	30.6726	34.8365	27.8233	22.6719	14.6511	10.4904	12.3754	16.3488	8.19202	41.6473	21.5893	24.0424	11.9558	14.2354	28.9627	28.1868	19.4351	18.2196	18.1405	17.7709	30.6069	43.7679	48.6846
959	10.4196	15.01	6.73217	16.6835	8.67158	8.88535	8.72372	15.2644	10.7337	12.3921	13.631	22.8325	24.65	29.2536	12.8728	16.2072	30.6192	34.8022	27.8298	22.6973	14.6553	10.5137	12.3835	16.352	8.19027	41.5774	21.5558	24.0069	11.9502	14.2308	28.9852	28.1669	19.4464	18.2135	18.1332	17.7795	30.6146	43.762	48.7331
960	10.3906	15.0161	6.73093	16.6842	8.66542	8.88399	8.71588	15.2521	10.7361	12.3804	13.6486	22.8551	24.6763	29.2502	12.8615	16.2128	30.5722	34.7611	27.8387	22.7128	14.6673	10.5279	12.3943	16.3483	8.18126	41.5117	21.5204	23.9788	11.9522	14.2287	29.0138	28.1409	19.462	18.2031	18.1301	17.7822	30.626	43.7547	48.777
961	10.3618	15.0252	6.725	16.6861	8.65292	8.87193	8.7066	15.245	10.7366	12.3695	13.6588	22.869	24.7029	29.2502	12.849	16.2155	30.5278	34.7176	27.8469	22.7183	14.6845	10.5286	12.4058	16.3411	8.16264	41.4465	21.484	23.9511	11.955	14.2274	29.0464	28.1104	19.483	18.1906	18.1276	17.7765	30.633	43.749	48.8173
962	10.3341	15.0315	6.72834	16.6835	8.65961	8.87007	8.72215	15.2449	10.7398	12.3665	13.6736	22.8918	24.711	29.2406	12.845	16.2243	30.4687	34.6919	27.8471	22.7358	14.691	10.5348	12.4174	16.3446	8.15599	41.3747	21.4527	23.9075	11.9421	14.2199	29.0666	28.0911	19.5035	18.1855	18.1176	17.7793	30.6325	43.7503	48.8674
963	10.2998	15.0412	6.72457	16.6859	8.65093	8.86909	8.7162	15.2379	10.737	12.344	13.6891	22.9076	24.7406	29.2405	12.8298	16.2363	30.4176	34.666	27.8548	22.7554	14.6973	10.5449	12.424	16.345	8.15546	41.3031	21.4177	23.8777	11.9424	14.2147	29.0908	28.0645	19.5158	18.1749	18.1144	17.7871	30.6297	43.7488	48.9173
964	10.271	15.0492	6.72047	16.6876	8.6454	8.86821	8.70012	15.2302	10.7342	12.3244	13.7025	22.9208	24.7696	29.2403	12.8157	16.2456	30.3724	34.6366	27.8674	22.7659	14.7048	10.5557	12.4284	16.3492	8.15525	41.2337	21.3801	23.8467	11.9367	14.2102	29.12	28.0349	19.5308	18.1602	18.1118	17.7936	30.6309	43.7432	48.964
965	10.2536	15.052	6.72231	16.6837	8.65662	8.86537	8.69314	15.2271	10.7374	12.3259	13.7121	22.9377	24.7774	29.2303	12.8136	16.249	30.3247	34.6016	27.8795	22.7645	14.7131	10.5639	12.4336	16.36	8.15062	41.1668	21.344	23.8018	11.9121	14.2033	29.1502	28.0085	19.5559	18.1471	18.1036	17.7927	30.6393	43.736	49.0079
966	10.2137	15.0607	6.71681	16.6839	8.6398	8.84691	8.69562	15.2134	10.7444	12.3164	13.7203	22.9553	24.7968	29.223	12.805	16.2554	30.2632	34.5489	27.8899	22.7763	14.721	10.5709	12.4358	16.3481	8.14221	41.0995	21.3158	23.7726	11.9141	14.1922	29.1727	27.9826	19.5726	18.1456	18.1006	17.7895	30.6394	43.7312	49.055
967	10.1864	15.0647	6.71197	16.6832	8.63305	8.83915	8.70251	15.2095	10.7475	12.3001	13.7283	22.971	24.8132	29.2197	12.7938	16.2599	30.2094	34.509	27.9012	22.792	14.7313	10.5816	12.4409	16.3483	8.12551	41.0329	21.2797	23.7398	11.9136	14.1897	29.1977	27.9526	19.5883	18.1383	18.095	17.7941	30.641	43.7286	49.1024
968	10.1714	15.0654	6.71095	16.6807	8.63946	8.84173	8.70554	15.2114	10.7431	12.2855	13.7394	22.9876	24.8292	29.2186	12.7814	16.2628	30.167	34.4845	27.9117	22.8062	14.7414	10.5952	12.4502	16.3611	8.10994	40.9635	21.2387	23.7037	11.9051	14.1946	29.2269	27.9231	19.6059	18.1224	18.087	17.8035	30.6491	43.7266	49.1477
969	10.1356	15.0742	6.71229	16.6795	8.63228	8.83153	8.6947	15.1949	10.7319	12.2838	13.7578	23.0118	24.8618	29.2154	12.7671	16.2686	30.1233	34.4522	27.916	22.8171	14.744	10.6056	12.4608	16.3581	8.11571	40.8851	21.2114	23.6813	11.9035	14.1931	29.2546	27.9061	19.6239	18.1089	18.0834	17.7997	30.6605	43.7221	49.1899
970	10.1093	15.0843	6.70667	16.6816	8.63061	8.82846	8.68704	15.1834	10.7401	12.2745	13.7684	23.0326	24.8834	29.2107	12.7571	16.2771	30.072	34.4037	27.9164	22.8211	14.7524	10.6185	12.4742	16.3651	8.11442	40.8257	21.1796	23.6435	11.8979	14.1881	29.2771	27.8867	19.6405	18.1024	18.0751	17.8074	30.6565	43.7187	49.2357
971	10.0843	15.0874	6.70261	16.6782	8.62665	8.8213	8.68814	15.1795	10.745	12.2604	13.7757	23.0521	24.9011	29.2046	12.7504	16.2878	30.0163	34.3578	27.9203	22.8297	14.763	10.6246	12.4827	16.372	8.10139	40.7645	21.1411	23.6033	11.8913	14.18	29.297	27.8601	19.6589	18.0955	18.0687	17.8168	30.6514	43.7169	49.2832
972	10.0535	15.0819	6.70519	16.6659	8.61517	8.80424	8.69556	15.1777	10.7302	12.2473	13.7868	23.0726	24.9249	29.1973	12.7438	16.2981	29.9629	34.3278	27.9326	22.8509	14.7708	10.6206	12.4829	16.3679	8.08334	40.6853	21.1014	23.575	11.8892	14.1713	29.3184	27.8269	19.6803	18.0809	18.0681	17.8163	30.6597	43.7148	49.3293
973	10.0384	15.0908	6.69207	16.67	8.62115	8.81526	8.68914	15.1604	10.7433	12.2312	13.8028	23.0872	24.9451	29.1902	12.7303	16.3013	29.9208	34.2822	27.9451	22.8729	14.7773	10.6356	12.4928	16.3648	8.08855	40.6286	21.0828	23.5444	11.8965	14.172	29.3471	27.7969	19.6935	18.0597	18.0541	17.8178	30.6695	43.705	49.3743
974	10.0118	15.0967	6.68584	16.6707	8.61608	8.81303	8.68761	15.1545	10.7422	12.2199	13.8105	23.1031	24.9665	29.1829	12.7186	16.3051	29.8744	34.2419	27.9535	22.8776	14.7864	10.6441	12.5044	16.3676	8.07893	40.5636	21.0524	23.5044	11.8917	14.1736	29.3739	27.7696	19.713	18.0524	18.0429	17.8192	30.6752	43.6987	49.4169
975	9.97755	15.0967	6.68811	16.666	8.60243	8.79621	8.69132	15.1588	10.7259	12.2113	13.8122	23.1236	24.9893	29.1787	12.7105	16.3108	29.822	34.207	27.963	22.876	14.7982	10.6461	12.5116	16.3737	8.05311	40.4908	21.009	23.4652	11.877	14.1695	29.3963	27.7442	19.7393	18.0531	18.0412	17.8228	30.6746	43.6972	49.461
976	9.9617	15.1001	6.6825	16.6692	8.60853	8.79787	8.68507	15.1476	10.7289	12.1957	13.8237	23.1472	25.0097	29.1826	12.7012	16.3148	29.7742	34.1602	27.9864	22.9028	14.8098	10.6625	12.5107	16.3743	8.04166	40.4371	20.9789	23.4496	11.8756	14.1563	29.4179	27.7198	19.7603	18.0344	18.0462	17.8326	30.6708	43.6946	49.5119
977	9.9383	15.1042	6.68056	16.6626	8.60198	8.80112	8.68307	15.1317	10.7319	12.1848	13.8454	23.1563	25.0294	29.1718	12.6868	16.3253	29.7318	34.112	27.9983	22.911	14.8154	10.668	12.5187	16.3822	8.03008	40.3739	20.95	23.4181	11.8632	14.1538	29.4466	27.6956	19.7741	18.0221	18.0419	17.8394	30.6856	43.6876	49.5514
978	9.90968	15.109	6.68072	16.656	8.59064	8.79916	8.67624	15.1233	10.734	12.1784	13.8638	23.1686	25.0536	29.1555	12.6778	16.3368	29.6862	34.0651	28.0047	22.9132	14.8223	10.6763	12.5349	16.3903	8.02564	40.3074	20.9166	23.3817	11.8553	14.154	29.4732	27.6707	19.7882	18.0113	18.031	17.841	30.6979	43.6866	49.5913
979	9.88426	15.1141	6.67952	16.6584	8.58664	8.79007	8.66039	15.1264	10.7351	12.1723	13.8688	23.1962	25.0826	29.1471	12.6785	16.3435	29.6331	34.0225	28.0144	22.9283	14.837	10.6977	12.5529	16.3925	8.0319	40.2474	20.878	23.354	11.8634	14.1489	29.4911	27.6447	19.8084	17.9947	18.0201	17.8431	30.6963	43.6924	49.6369
980	9.85979	15.1156	6.67573	16.6541	8.58695	8.78252	8.66415	15.1134	10.7255	12.1593	13.8724	23.2032	25.0967	29.1508	12.6616	16.351	29.5901	33.9943	28.0205	22.9504	14.8541	10.7012	12.5596	16.4014	8.02689	40.1887	20.8486	23.3177	11.8543	14.1518	29.5146	27.6184	19.8263	17.9818	18.0128	17.8651	30.7001	43.6829	49.6718
981	9.83947	15.1188	6.67881	16.6553	8.58261	8.76723	8.67582	15.1049	10.7246	12.1487	13.8852	23.2146	25.1141	29.1434	12.6519	16.355	29.5525	33.9612	28.0272	22.969	14.8634	10.7068	12.571	16.4	8.01574	40.1359	20.8149	23.2827	11.8525	14.153	29.5411	27.5928	19.8412	17.9736	18.0078	17.8757	30.7123	43.6715	49.7066
982	9.8216	15.1232	6.68436	16.6612	8.57662	8.75164	8.68231	15.1029	10.7314	12.1407	13.9026	23.2309	25.1371	29.1288	12.6491	16.3572	29.5122	33.9217	28.0376	22.9822	14.8688	10.7194	12.5857	16.3982	8.00722	40.0805	20.7806	23.2546	11.859	14.1504	29.567	27.5699	19.86	17.9656	18.0025	17.8766	30.7226	43.6661	49.7448
983	9.80074	15.1244	6.6771	16.6605	8.58136	8.75616	8.67073	15.0936	10.7278	12.1285	13.9075	23.233	25.1545	29.133	12.6333	16.3639	29.4594	33.8901	28.054	22.9961	14.8853	10.7313	12.5878	16.4259	8.01197	40.0044	20.7631	23.2349	11.8554	14.1481	29.5884	27.552	19.8943	17.95	17.9935	17.8818	30.7197	43.6683	49.786
984	9.77787	15.1362	6.67614	16.6517	8.57694	8.76124	8.66367	15.086	10.733	12.1237	13.9129	23.2541	25.1804	29.1262	12.627	16.3768	29.4115	33.8673	28.0653	23.0061	14.8911	10.7449	12.5915	16.4424	8.00534	39.9445	20.7325	23.2048	11.8575	14.1431	29.6161	27.5276	19.9134	17.9497	17.9789	17.8971	30.7215	43.6555	49.8218
985	9.75968	15.1444	6.67731	16.6486	8.5697	8.75479	8.66707	15.0789	10.7346	12.112	13.9208	23.2773	25.1977	29.1162	12.6206	16.386	29.3707	33.842	28.0754	23.0246	14.8981	10.7576	12.5963	16.4447	7.99004	39.8918	20.6962	23.1725	11.8553	14.1419	29.6463	27.5034	19.9277	17.9485	17.9739	17.9069	30.727	43.6451	49.8587
986	9.74638	15.1395	6.67326	16.6588	8.56727	8.73434	8.67556	15.0706	10.7241	12.0862	13.9307	23.2867	25.1992	29.1134	12.6059	16.3872	29.3335	33.8086	28.0894	23.0544	14.9167	10.7663	12.6041	16.441	7.97479	39.8329	20.6648	23.1471	11.8439	14.1483	29.673	27.4843	19.9492	17.9305	17.9853	17.9085	30.7358	43.6438	49.9005
987	9.72149	15.1469	6.66109	16.659	8.56181	8.71962	8.65837	15.0638	10.7283	12.0772	13.9385	23.3063	25.2319	29.1102	12.6031	16.4027	29.2902	33.7912	28.1063	23.0543	14.9296	10.766	12.6379	16.4468	7.96626	39.7745	20.6315	23.1223	11.8546	14.1508	29.6933	27.4547	19.9611	17.9087	17.9824	17.9134	30.7488	43.6446	49.9471
988	9.69915	15.1492	6.66046	16.6544	8.56369	8.72648	8.64966	15.0574	10.7269	12.074	13.9607	23.3223	25.2598	29.0981	12.5965	16.4084	29.2395	33.7671	28.1196	23.0647	14.9361	10.7787	12.6443	16.4531	7.9661	39.7129	20.6043	23.0928	11.8593	14.1483	29.7138	27.4268	19.9834	17.8939	17.9653	17.7492	30.5702	43.4976	50.0751
989	9.68	15.1487	6.66767	16.6497	8.56463	8.73721	8.65122	15.0512	10.7189	12.0702	13.9853	23.3338	25.2754	29.0832	12.5832	16.4061	29.1921	33.7353	28.1269	23.0849	14.9449	10.8036	12.6301	16.4589	7.96907	39.6512	20.5834	23.0606	11.8585	14.1451	29.7377	27.4002	20.0154	17.8865	17.9471	17.7599	30.5794	43.4961	50.1195
990	9.65553	15.1617	6.66168	16.6487	8.54414	8.71055	8.64066	15.0454	10.7185	12.0636	13.9789	23.3491	25.294	29.082	12.5712	16.4171	29.166	33.7119	28.13	23.0837	14.9705	10.8217	12.6489	16.4685	7.96442	39.5965	20.5618	23.0337	11.8738	14.1488	29.7652	27.3661	20.04	17.8781	17.9494	17.7655	30.5861	43.4918	50.1629
991	9.63702	15.1575	6.67082	16.6477	8.54862	8.70685	8.65217	15.0317	10.7191	12.0512	13.9707	23.3509	25.3071	29.0808	12.5606	16.4236	29.1217	33.6815	28.1429	23.0991	14.9715	10.8336	12.6686	16.469	7.95069	39.5469	20.5275	23.0049	11.8694	14.1477	29.7853	27.3491	20.0563	17.877	17.935	17.7755	30.5947	43.489	50.2061
992	9.61734	15.158	6.67377	16.6506	8.55277	8.70834	8.65612	15.0225	10.7182	12.0373	13.9803	23.3626	25.3245	29.0773	12.5559	16.4369	29.0784	33.6492	28.1628	23.1151	14.9717	10.8439	12.6861	16.4714	7.94384	39.4939	20.494	22.9729	11.8606	14.1439	29.8075	27.3393	20.0711	17.8723	17.922	17.787	30.6037	43.4862	50.2483
993	9.5933	15.1787	6.65696	16.6586	8.53701	8.69808	8.63178	15.0235	10.7162	12.0246	14.0093	23.3957	25.356	29.0712	12.5559	16.4616	29.0499	33.6203	28.1829	23.1202	14.992	10.8552	12.7016	16.4846	7.95184	39.4318	20.4722	22.9412	11.8614	14.1406	29.8382	27.323	20.0913	17.8571	17.9272	17.7978	30.6126	43.484	50.2919
994	9.59053	15.1824	6.6614	16.6621	8.54656	8.71416	8.62388	15.0054	10.7202	12.0056	14.01	23.3994	25.4084	29.0602	12.5391	16.4627	28.9966	33.5892	28.1975	23.1512	15.0053	10.8597	12.709	16.4967	7.94794	39.3628	20.45	22.9259	11.8512	14.1339	29.8636	27.2991	20.1183	17.8485	17.9282	17.8097	30.6205	43.4818	50.3354
995	9.57851	15.1839	6.65828	16.6605	8.54046	8.70595	8.61154	14.9986	10.7229	11.9962	14.014	23.4135	25.4132	29.0514	12.529	16.4638	28.9509	33.5611	28.2033	23.1786	15.0223	10.8707	12.7168	16.5112	7.94194	39.3189	20.4163	22.9051	11.8456	14.1465	29.8783	27.2691	20.1479	17.839	17.9194	17.8212	30.6301	43.4796	50.3791
996	9.55585	15.1833	6.64992	16.6535	8.52397	8.68355	8.60128	14.9993	10.722	11.9936	14.0229	23.4361	25.3977	29.0459	12.5259	16.4712	28.9175	33.5373	28.2123	23.1889	15.0364	10.8844	12.7253	16.521	7.93126	39.2916	20.3808	22.8764	11.8485	14.163	29.8897	27.2381	20.177	17.8247	17.9092	17.8317	30.6405	43.4775	50.424
997	9.54872	15.1729	6.65898	16.6428	8.53291	8.69721	8.6158	14.9817	10.7192	11.9829	14.0206	23.4369	25.4518	29.0406	12.5142	16.4788	28.8809	33.5148	28.2437	23.1828	15.0322	10.8851	12.7299	16.514	7.90767	39.243	20.3662	22.8516	11.855	14.145	29.9138	27.2134	20.2036	17.8049	17.915	17.8431	30.6508	43.4762	50.4695
998	9.52394	15.1824	6.66047	16.6469	8.52964	8.69046	8.6141	14.9772	10.7067	11.985	14.0496	23.4424	25.4748	29.0413	12.5083	16.4919	28.8413	33.481	28.2534	23.198	15.0558	10.8917	12.7381	16.5267	7.91094	39.1831	20.3357	22.83	11.8601	14.1551	29.9415	27.1859	20.2224	17.7986	17.9122	17.8549	30.6634	43.4739	50.5137
999	9.50489	15.1878	6.65797	16.6474	8.52278	8.67847	8.61647	14.973	10.7007	11.9879	14.0648	23.4544	25.4856	29.0348	12.4987	16.5022	28.8077	33.4498	28.2611	23.2238	15.0764	10.9074	12.7543	16.5441	7.92146	39.1259	20.2948	22.8078	11.8537	14.1659	29.9631	27.1605	20.2369	17.7951	17.8984	17.8667	30.6755	43.4715	50.5548
1000	9.50351	15.1766	6.6574	16.6358	8.52304	8.67716	8.63636	14.9594	10.7109	11.9801	14.0425	23.4703	25.5081	29.0154	12.4824	16.5047	28.7797	33.4289	28.2848	23.2444	15.0731	10.9284	12.7766	16.5513	7.92074	39.0812	20.2599	22.7854	11.8403	14.1536	29.9772	27.142	20.254	17.7844	17.8827	17.8789	30.6881	43.4702	50.5986
1001	9.26266	14.9916	6.33821	16.6768	8.61166	8.43238	8.43603	14.8636	10.5281	11.6446	13.8626	22.9981	25.1255	28.7342	12.3747	16.487	28.5945	33.6597	28.2378	22.8831	14.8178	10.8084	12.6043	16.412	7.7627	38.6126	20.1881	22.7432	11.5612	14.0229	29.8159	26.9522	20.1788	18.2307	18.1712	17.8914	30.7013	43.4697	50.6437
1002	9.25053	14.9931	6.33954	16.6756	8.60701	8.42858	8.43912	14.8553	10.5255	11.637	13.8638	23.0053	25.1406	28.7234	12.3661	16.4991	28.5547	33.6261	28.2549	22.9074	14.8304	10.8193	12.6236	16.4276	7.75981	38.5519	20.1608	22.7212	11.5668	14.0261	29.8355	26.9287	20.2056	18.2204	18.1665	17.9041	30.7138	43.469	50.6868
1003	9.23819	14.9952	6.34118	16.6756	8.60349	8.42441	8.43681	14.8491	10.5253	11.6303	13.8705	23.0162	25.1608	28.7145	12.3586	16.5085	28.5171	33.5945	28.2738	22.925	14.8446	10.833	12.6389	16.4395	7.75672	38.4996	20.1341	22.697	11.571	14.0295	29.8576	26.9051	20.2322	18.2101	18.1596	17.9176	30.7258	43.4694	50.7305
1004	9.22511	14.9965	6.34362	16.676	8.60112	8.42132	8.43414	14.842	10.5269	11.6254	13.8803	23.0278	25.1833	28.7073	12.3499	16.5164	28.4793	33.5613	28.2936	22.9366	14.8616	10.8457	12.6527	16.4486	7.75226	38.4469	20.1077	22.6711	11.5745	14.0305	29.8839	26.8807	20.2566	18.2006	18.1482	17.9301	30.7392	43.4689	50.773
1005	9.21191	14.9995	6.34372	16.6759	8.59732	8.41693	8.43129	14.8359	10.5269	11.6172	13.8904	23.0379	25.2028	28.6992	12.3424	16.5263	28.4436	33.5306	28.3126	22.9535	14.8766	10.8599	12.6682	16.4602	7.74995	38.3978	20.0811	22.6465	11.579	14.0345	29.9072	26.8592	20.2831	18.1897	18.1413	17.942	30.7529	43.4683	50.812
1006	9.19723	15.0028	6.34189	16.6761	8.59228	8.41053	8.42311	14.8336	10.5282	11.6074	13.9046	23.048	25.2228	28.6901	12.337	16.536	28.4122	33.5034	28.332	22.9718	14.8909	10.8783	12.6817	16.4712	7.75048	38.3589	20.055	22.6212	11.5857	14.0405	29.9298	26.8403	20.3106	18.1789	18.1365	17.9544	30.7666	43.4673	50.854
1007	9.18479	15.0061	6.34216	16.6765	8.58869	8.40625	8.41868	14.8281	10.5278	11.5989	13.9143	23.0586	25.2427	28.6827	12.3308	16.5463	28.3777	33.4751	28.3517	22.9892	14.9056	10.8937	12.6969	16.483	7.74814	38.3131	20.0285	22.5981	11.5908	14.0461	29.952	26.8187	20.3386	18.1685	18.131	17.9662	30.7813	43.4651	50.8974
1008	9.17394	15.011	6.34188	16.6763	8.58561	8.40355	8.41557	14.8198	10.5253	11.5898	13.9238	23.0697	25.2623	28.6749	12.3246	16.5585	28.3432	33.4501	28.3708	23.0104	14.9201	10.9079	12.7155	16.4958	7.74525	38.2623	20.001	22.5778	11.5954	14.0516	29.974	26.7986	20.367	18.1579	18.1272	17.9788	30.7959	43.4645	50.9404
1009	9.16383	15.0148	6.34178	16.6765	8.58086	8.39843	8.41614	14.8135	10.5231	11.5781	13.9298	23.0764	25.2772	28.6706	12.3184	16.5702	28.3056	33.4184	28.3914	23.0281	14.9346	10.9206	12.7322	16.5097	7.74169	38.2172	19.9748	22.5537	11.5994	14.0598	29.9939	26.7754	20.396	18.1449	18.1241	17.9923	30.8105	43.4647	50.9855
1010	9.15404	15.0164	6.34444	16.6767	8.57721	8.39123	8.41353	14.8076	10.5214	11.5702	13.9341	23.0865	25.2918	28.6659	12.3114	16.5803	28.2679	33.3821	28.4104	23.0456	14.9484	10.935	12.747	16.5238	7.73702	38.1717	19.9482	22.5332	11.6052	14.067	30.0153	26.7491	20.4259	18.136	18.1171	18.0056	30.8251	43.4645	51.0286
1011	9.1434	15.0215	6.34639	16.6776	8.57424	8.38729	8.41139	14.8001	10.5228	11.5645	13.9407	23.099	25.3108	28.6585	12.3048	16.5898	28.2351	33.3462	28.4308	23.058	14.9637	10.9499	12.7615	16.5353	7.73288	38.125	19.9237	22.5148	11.6076	14.0729	30.0355	26.7251	20.4559	18.1252	18.1083	18.0188	30.8399	43.4646	51.0708
1012	9.1317	15.0279	6.34525	16.6793	8.57064	8.38345	8.41026	14.7948	10.525	11.5569	13.9487	23.1094	25.3308	28.6483	12.298	16.6011	28.2043	33.3187	28.4499	23.0727	14.9793	10.964	12.7754	16.5488	7.732	38.0894	19.8992	22.4924	11.6129	14.0806	30.0563	26.7033	20.482	18.1126	18.1028	18.0325	30.8553	43.4665	51.1123
1013	9.11968	15.0327	6.34371	16.6792	8.56695	8.37685	8.40489	14.7891	10.525	11.5518	13.958	23.1196	25.3508	28.6368	12.2902	16.6144	28.1726	33.2955	28.4667	23.0938	14.9923	10.9774	12.7918	16.5634	7.73185	38.0493	19.8734	22.4706	11.6195	14.0882	30.0751	26.6807	20.5093	18.1033	18.0966	18.0451	30.87	43.4652	51.1529
1014	9.10968	15.0378	6.34354	16.6793	8.56334	8.37235	8.40192	14.7814	10.5233	11.5438	13.9647	23.1266	25.3698	28.6277	12.2828	16.6263	28.1427	33.2689	28.4874	23.1101	15.0068	10.9909	12.8083	16.5777	7.72904	38.0075	19.8491	22.4502	11.6245	14.0952	30.0932	26.6585	20.5374	18.091	18.0904	18.0572	30.8838	43.462	51.192
1015	9.09947	15.0442	6.34325	16.6799	8.56113	8.3715	8.39972	14.7728	10.5201	11.5344	13.9691	23.1297	25.3931	28.6188	12.276	16.6392	28.1154	33.25	28.5115	23.1239	15.0223	11.0024	12.8256	16.5933	7.72485	37.967	19.8266	22.4291	11.6275	14.1003	30.1087	26.6381	20.5647	18.0756	18.0856	18.0696	30.899	43.4602	51.2316
1016	9.09	15.0488	6.34293	16.68	8.55681	8.36745	8.39746	14.7645	10.5166	11.5256	13.9757	23.1355	25.4106	28.6108	12.2685	16.651	28.0844	33.224	28.5315	23.1405	15.0373	11.0158	12.8425	16.6066	7.72083	37.9235	19.8012	22.4081	11.6329	14.1092	30.1277	26.6148	20.5926	18.0628	18.0805	18.0814	30.9141	43.457	51.271
1017	9.08	15.0517	6.34506	16.6787	8.55137	8.36223	8.39565	14.7538	10.5098	11.5162	13.9843	23.1407	25.4211	28.6062	12.2597	16.6607	28.0529	33.1862	28.5511	23.1568	15.0527	11.0312	12.8608	16.6176	7.71447	37.8734	19.7738	22.3889	11.6394	14.1204	30.1487	26.5894	20.6227	18.05	18.075	18.0937	30.9303	43.4559	51.3096
1018	9.07032	15.0561	6.34456	16.6788	8.54568	8.35612	8.39347	14.7445	10.5063	11.5059	13.9892	23.1461	25.4368	28.5978	12.2526	16.6725	28.0223	33.1603	28.5724	23.173	15.0673	11.0453	12.8772	16.6311	7.71149	37.8296	19.7495	22.3693	11.6453	14.1297	30.1675	26.5655	20.6508	18.0383	18.0686	18.1064	30.9485	43.4572	51.3473
1019	9.06021	15.061	6.34146	16.6813	8.53867	8.34814	8.39168	14.7367	10.5042	11.4956	13.9933	23.1527	25.4551	28.5871	12.2462	16.6855	27.987	33.1436	28.5911	23.1909	15.0812	11.0585	12.8929	16.6437	7.71142	37.7876	19.7261	22.3492	11.653	14.1393	30.1864	26.5404	20.6758	18.029	18.062	18.1189	30.9649	43.4567	51.3859
1020	9.0516	15.0648	6.33954	16.6808	8.53242	8.34179	8.38813	14.7278	10.5013	11.4863	13.9981	23.1589	25.4702	28.5771	12.2398	16.6986	27.958	33.1187	28.6113	23.2086	15.0949	11.0723	12.9089	16.6579	7.70948	37.7454	19.7014	22.3292	11.6587	14.1504	30.2049	26.5161	20.7042	18.0176	18.0562	18.1316	30.9807	43.4562	51.4254
1021	9.04447	15.0684	6.33778	16.6787	8.52557	8.3352	8.3837	14.7172	10.4985	11.4765	14.0027	23.1645	25.4834	28.5659	12.2339	16.7135	27.9335	33.0928	28.633	23.2258	15.1076	11.0866	12.9245	16.6745	7.70921	37.704	19.6782	22.3108	11.6636	14.1615	30.2225	26.4921	20.7341	18.0066	18.0504	18.1439	30.9971	43.4555	51.4627
1022	9.03628	15.0715	6.33481	16.6779	8.51999	8.32858	8.38052	14.7104	10.4976	11.4661	14.0013	23.1699	25.5009	28.5542	12.2293	16.7263	27.9098	33.0677	28.6571	23.2434	15.1214	11.0988	12.9385	16.6914	7.70532	37.6659	19.6539	22.2905	11.6653	14.1713	30.238	26.4708	20.7643	17.9942	18.0425	18.1559	31.0121	43.4538	51.4988
1023	9.02617	15.0749	6.33225	16.6767	8.51518	8.32361	8.37156	14.7024	10.493	11.457	14.0014	23.1749	25.5143	28.5469	12.2216	16.7369	27.883	33.0452	28.6801	23.2597	15.137	11.1114	12.9544	16.706	7.69837	37.6267	19.6303	22.2686	11.6704	14.1833	30.2542	26.4479	20.7951	17.9776	18.0365	18.168	31.0286	43.4523	51.5356
1024	9.01819	15.08	6.332	16.6748	8.50984	8.31865	8.36586	14.6913	10.4895	11.4477	14.005	23.1814	25.5285	28.5407	12.2119	16.7496	27.8562	33.0201	28.7036	23.2765	15.1521	11.125	12.9703	16.7196	7.69484	37.5897	19.6075	22.2487	11.678	14.1962	30.2733	26.4252	20.8256	17.9612	18.0292	18.1796	31.0457	43.4511	51.5705
1025	9.01138	15.0855	6.33125	16.675	8.50486	8.31275	8.36616	14.6824	10.4874	11.4387	14.0059	23.1868	25.5458	28.5317	12.2046	16.7624	27.8266	32.9981	28.7274	23.2964	15.1663	11.1391	12.9875	16.7342	7.69276	37.5534	19.5843	22.2324	11.6845	14.2078	30.2913	26.4041	20.8553	17.9498	18.018	18.1918	31.0643	43.4495	51.606
1026	9.00298	15.0914	6.32919	16.676	8.49961	8.30672	8.36114	14.6716	10.4827	11.431	14.0067	23.191	25.5587	28.5222	12.1961	16.7752	27.7946	32.9776	28.7495	23.312	15.1819	11.1534	13.007	16.749	7.68729	37.5188	19.5614	22.2178	11.6923	14.2189	30.3092	26.3823	20.8853	17.9378	18.0089	18.2043	31.0828	43.4482	51.6428
1027	8.99468	15.0966	6.32779	16.6761	8.49375	8.2983	8.35647	14.6599	10.4797	11.4245	14.0098	23.1978	25.5733	28.5114	12.1876	16.7899	27.7699	32.9453	28.7733	23.329	15.1961	11.167	13.0265	16.7639	7.68442	37.4833	19.5359	22.2049	11.7023	14.2301	30.3267	26.3618	20.9139	17.9262	18.0019	18.2174	31.1022	43.4467	51.6816
1028	8.98713	15.0998	6.3259	16.6753	8.48787	8.28954	8.35374	14.6505	10.4776	11.4153	14.0134	23.2028	25.5865	28.4997	12.1826	16.805	27.7481	32.9178	28.7984	23.3533	15.2087	11.1802	13.0456	16.779	7.68193	37.4427	19.5104	22.19	11.7089	14.2417	30.3426	26.3408	20.9429	17.9162	17.9961	18.23	31.1211	43.4456	51.7185
1029	8.98053	15.1044	6.32387	16.6749	8.48116	8.2822	8.34951	14.6411	10.4733	11.4057	14.0163	23.2069	25.6007	28.4896	12.1754	16.8187	27.7242	32.8967	28.8209	23.3732	15.2233	11.1941	13.0631	16.7949	7.67747	37.407	19.487	22.1741	11.7151	14.254	30.3606	26.3204	20.9726	17.9062	17.9883	18.2427	31.1401	43.4449	51.7551
1030	8.97415	15.1102	6.32151	16.6747	8.4728	8.27424	8.34189	14.6317	10.4659	11.3957	14.0184	23.2115	25.6162	28.4811	12.1653	16.8314	27.7024	32.8814	28.8428	23.3913	15.2393	11.2078	13.0785	16.811	7.67137	37.3726	19.4662	22.156	11.7213	14.2664	30.3788	26.3019	21.0012	17.8963	17.9797	18.2554	31.1593	43.4442	51.7915
1031	8.9667	15.1143	6.31962	16.6739	8.46682	8.2668	8.33703	14.623	10.4618	11.3845	14.0212	23.2134	25.6323	28.4722	12.1575	16.8445	27.6787	32.8625	28.8665	23.409	15.2545	11.2213	13.0958	16.8276	7.66734	37.3391	19.4437	22.1397	11.7283	14.2796	30.3962	26.2804	21.0313	17.8841	17.9727	18.2678	31.1779	43.4441	51.8275
1032	8.95926	15.1176	6.31761	16.672	8.46189	8.26167	8.33362	14.6169	10.4592	11.3697	14.0255	23.2116	25.648	28.464	12.1512	16.8559	27.6515	32.8473	28.8866	23.4243	15.2701	11.235	13.1122	16.8456	7.66195	37.3087	19.4201	22.1231	11.7338	14.2939	30.4153	26.2566	21.0632	17.8731	17.966	18.2805	31.1976	43.4432	51.8634
1033	8.95383	15.1224	6.31611	16.6725	8.45563	8.2549	8.32935	14.608	10.4552	11.36	14.0268	23.2129	25.6639	28.4548	12.144	16.8697	27.6277	32.8307	28.9107	23.4408	15.2862	11.2493	13.1307	16.8624	7.65825	37.2777	19.3988	22.1076	11.7404	14.308	30.4328	26.2358	21.0952	17.8606	17.9576	18.2933	31.2187	43.4421	51.9003
1034	8.94809	15.127	6.31518	16.6736	8.45017	8.24682	8.32436	14.5978	10.4517	11.3531	14.0262	23.2143	25.6812	28.4448	12.1361	16.8847	27.6046	32.8133	28.9394	23.4556	15.3022	11.2635	13.1515	16.8788	7.65602	37.2471	19.3783	22.0931	11.7481	14.322	30.4481	26.2151	21.1278	17.8451	17.9492	18.3064	31.2391	43.4408	51.9352
1035	8.94202	15.1315	6.31407	16.6745	8.44402	8.23926	8.32132	14.5883	10.4484	11.3427	14.027	23.2162	25.6951	28.4356	12.1307	16.9008	27.5847	32.7926	28.9658	23.4747	15.3189	11.2776	13.1715	16.8956	7.65447	37.2167	19.3585	22.0777	11.7552	14.3366	30.4633	26.1934	21.1607	17.8296	17.9435	18.3196	31.2596	43.4387	51.969
1036	8.93649	15.1391	6.3124	16.6778	8.43607	8.23233	8.31715	14.5772	10.4442	11.3341	14.0271	23.2176	25.7101	28.4277	12.1244	16.9166	27.5663	32.7757	28.9906	23.4957	15.3363	11.2908	13.1914	16.9112	7.65328	37.1847	19.3372	22.0637	11.765	14.3509	30.4797	26.1738	21.1943	17.817	17.9355	18.333	31.2803	43.437	52.0029
1037	8.93191	15.1463	6.30964	16.6814	8.43069	8.22607	8.31276	14.5657	10.4391	11.3247	14.0283	23.2199	25.7292	28.4179	12.1173	16.9331	27.5458	32.7612	29.0156	23.5181	15.3537	11.3056	13.2099	16.9281	7.65105	37.1511	19.3173	22.053	11.7745	14.366	30.4971	26.1554	21.2276	17.8057	17.928	18.3468	31.301	43.4354	52.0372
1038	8.92617	15.1509	6.30832	16.684	8.42667	8.22041	8.30725	14.5568	10.4354	11.3121	14.0304	23.2239	25.7465	28.4072	12.111	16.9476	27.5272	32.7428	29.0383	23.5368	15.3709	11.3205	13.2278	16.9464	7.64672	37.1188	19.298	22.0427	11.7848	14.3811	30.5149	26.1363	21.2596	17.7963	17.9228	18.36	31.3211	43.4336	52.0687
1039	8.92298	15.1554	6.30747	16.6878	8.42168	8.21497	8.30117	14.5466	10.4331	11.3013	14.0328	23.2243	25.7599	28.3988	12.1047	16.9614	27.5082	32.7294	29.0637	23.5551	15.3867	11.3339	13.2467	16.9627	7.64284	37.0841	19.2777	22.0326	11.7956	14.3954	30.5321	26.1189	21.2923	17.7871	17.918	18.3737	31.3415	43.4328	52.1015
1040	8.92021	15.1604	6.30573	16.6928	8.4171	8.20921	8.29607	14.538	10.4297	11.2913	14.0347	23.2244	25.7729	28.3908	12.0988	16.9766	27.4881	32.7172	29.0897	23.5743	15.4019	11.3498	13.2655	16.9786	7.63803	37.0569	19.2611	22.0227	11.8029	14.4116	30.5507	26.1033	21.3253	17.7762	17.913	18.3875	31.3624	43.4318	52.1323
1041	8.91755	15.1663	6.30726	16.6991	8.41234	8.20258	8.29376	14.5316	10.4243	11.2848	14.0346	23.2242	25.7863	28.3821	12.0927	16.9923	27.4723	32.703	29.1154	23.5921	15.4176	11.3662	13.2864	16.9955	7.63388	37.0328	19.2462	22.0107	11.8099	14.4284	30.5692	26.0859	21.3581	17.7648	17.9073	18.4011	31.384	43.4297	52.1621
1042	8.91426	15.1721	6.30839	16.7063	8.40671	8.1969	8.2923	14.5222	10.4197	11.2793	14.0376	23.223	25.7988	28.3749	12.0862	17.0078	27.4527	32.6883	29.1429	23.6121	15.4348	11.3805	13.3087	17.0128	7.63282	37.0051	19.2263	21.9995	11.8191	14.4439	30.5844	26.0671	21.3907	17.7556	17.903	18.4148	31.4062	43.4266	52.1903
1043	8.91043	15.1788	6.30626	16.7148	8.40139	8.19129	8.29064	14.5136	10.4183	11.2715	14.0398	23.2241	25.8109	28.3677	12.0796	17.023	27.4309	32.6738	29.1696	23.6334	15.4527	11.3948	13.3295	17.0308	7.63107	36.9787	19.2065	21.9897	11.8292	14.4588	30.601	26.0485	21.4239	17.746	17.898	18.4283	31.4279	43.4249	52.219
1044	8.90691	15.1857	6.3053	16.7262	8.39625	8.18491	8.28753	14.5065	10.4176	11.2638	14.0378	23.2246	25.8263	28.3596	12.0737	17.0381	27.4169	32.666	29.1969	23.6495	15.4705	11.41	13.3506	17.0508	7.62842	36.9522	19.19	21.9785	11.841	14.4731	30.6166	26.0291	21.4576	17.7359	17.8902	18.4415	31.4499	43.4222	52.2469
1045	8.90372	15.1901	6.30449	16.7383	8.39092	8.17878	8.27936	14.4964	10.4177	11.2541	14.0374	23.2247	25.8398	28.3523	12.0687	17.0536	27.4031	32.6593	29.225	23.6666	15.4889	11.4265	13.3718	17.0721	7.62619	36.9272	19.1739	21.9696	11.8526	14.4879	30.6293	26.0095	21.4901	17.7279	17.8832	18.4549	31.4722	43.421	52.2748
1046	8.9016	15.1952	6.30301	16.751	8.38633	8.17257	8.27313	14.4866	10.4158	11.2443	14.0378	23.2254	25.8522	28.3447	12.0638	17.0694	27.3884	32.6505	29.253	23.6852	15.5066	11.4424	13.393	17.092	7.62376	36.9038	19.1577	21.9617	11.8633	14.5038	30.6436	25.9915	21.5239	17.7184	17.877	18.4686	31.494	43.4225	52.3028
1047	8.89936	15.201	6.3003	16.765	8.38225	8.16539	8.26585	14.4767	10.4136	11.2329	14.0372	23.2254	25.8629	28.3375	12.0596	17.0854	27.3758	32.6419	29.2809	23.7035	15.5234	11.4587	13.413	17.1117	7.62081	36.8846	19.1431	21.9551	11.873	14.5211	30.6592	25.974	21.5589	17.7074	17.87	18.4821	31.5162	43.422	52.3298
1048	8.89745	15.2067	6.29858	16.7805	8.37871	8.15904	8.25964	14.4681	10.408	11.2234	14.0376	23.225	25.879	28.3303	12.056	17.102	27.3661	32.6363	29.3107	23.7218	15.5412	11.4752	13.4359	17.1302	7.61772	36.8643	19.1281	21.9462	11.8836	14.539	30.674	25.958	21.5943	17.6959	17.8646	18.4957	31.5391	43.4209	52.3568
1049	8.89649	15.2106	6.29805	16.7943	8.3743	8.15389	8.25561	14.4574	10.4041	11.2137	14.0404	23.2261	25.8923	28.323	12.0515	17.1196	27.3516	32.6313	29.3388	23.7451	15.5602	11.4914	13.4598	17.1478	7.61606	36.8406	19.112	21.9397	11.8939	14.5557	30.6872	25.9436	21.6281	17.6876	17.8623	18.5093	31.562	43.4196	52.3829
1050	8.89543	15.2156	6.29833	16.8073	8.3693	8.14879	8.25424	14.4465	10.3996	11.203	14.0415	23.2275	25.9032	28.3143	12.0459	17.1358	27.3353	32.6246	29.368	23.7656	15.5779	11.5057	13.4811	17.1667	7.61341	36.8159	19.0968	21.9334	11.9058	14.5714	30.7029	25.9312	21.6625	17.6796	17.8583	18.5228	31.5843	43.4176	52.4084
1051	8.89436	15.2205	6.29848	16.8209	8.36409	8.14283	8.25035	14.4371	10.3949	11.1944	14.0411	23.2283	25.9193	28.3054	12.0415	17.1517	27.3227	32.6205	29.4008	23.784	15.5973	11.5205	13.5042	17.1864	7.61006	36.7919	19.0846	21.9258	11.9199	14.5858	30.7189	25.9188	21.6969	17.6713	17.8524	18.5367	31.6081	43.4156	52.4337
1052	8.8933	15.2246	6.2996	16.8332	8.35894	8.13524	8.24535	14.428	10.3925	11.187	14.0394	23.2272	25.9322	28.2985	12.0376	17.1677	27.3117	32.6182	29.4297	23.8053	15.617	11.536	13.5278	17.2069	7.6101	36.7729	19.0742	21.9216	11.9322	14.6007	30.733	25.9043	21.733	17.6629	17.8475	18.5506	31.6331	43.4137	52.4565
1053	8.89266	15.2285	6.3003	16.8427	8.35407	8.12857	8.23923	14.4203	10.3879	11.1785	14.0375	23.2244	25.9441	28.2922	12.0335	17.183	27.2991	32.6132	29.4607	23.8264	15.6341	11.551	13.5488	17.2291	7.60888	36.7549	19.0628	21.9184	11.944	14.6186	30.7483	25.889	21.7702	17.653	17.8433	18.5645	31.6585	43.4123	52.4777
1054	8.89287	15.2317	6.29931	16.8502	8.35013	8.12269	8.23385	14.4141	10.3823	11.1706	14.0379	23.2235	25.9614	28.2849	12.0307	17.1981	27.2868	32.6079	29.4929	23.8458	15.6519	11.5672	13.5724	17.2497	7.6072	36.7325	19.049	21.9136	11.9558	14.6368	30.7632	25.8729	21.8062	17.6411	17.8396	18.5787	31.6835	43.4112	52.4992
1055	8.89383	15.2339	6.29848	16.8554	8.34642	8.11734	8.2325	14.4064	10.3802	11.1631	14.0388	23.2234	25.9774	28.2772	12.0273	17.2132	27.2749	32.6034	29.5212	23.8662	15.6713	11.5842	13.5963	17.2695	7.60801	36.7123	19.0338	21.9085	11.9671	14.6549	30.7782	25.8574	21.8439	17.6304	17.8361	18.5931	31.7083	43.4093	52.519
1056	8.89468	15.2355	6.29737	16.8573	8.34219	8.11391	8.22999	14.3967	10.3792	11.1538	14.0388	23.221	25.9921	28.2695	12.0223	17.2289	27.2633	32.6003	29.5531	23.8861	15.6896	11.6003	13.6185	17.2909	7.60589	36.6906	19.0203	21.9044	11.982	14.6737	30.793	25.8433	21.8822	17.6219	17.8308	18.6076	31.7335	43.4071	52.5374
1057	8.89617	15.2369	6.29615	16.8588	8.33928	8.10924	8.22543	14.3874	10.3765	11.1438	14.04	23.2199	26.0071	28.262	12.0173	17.2442	27.2529	32.5994	29.5844	23.9036	15.7087	11.616	13.6423	17.313	7.60373	36.6646	19.0083	21.9	11.9979	14.6906	30.8052	25.8297	21.9183	17.6135	17.8239	18.622	31.758	43.405	52.556
1058	8.89681	15.2388	6.29679	16.8587	8.33685	8.10266	8.22273	14.3788	10.3749	11.1363	14.0409	23.2198	26.0206	28.2552	12.0128	17.2596	27.2431	32.599	29.6142	23.9233	15.7286	11.633	13.6666	17.3336	7.604	36.6462	18.9986	21.8958	12.0116	14.7061	30.8185	25.8175	21.9553	17.6057	17.818	18.6369	31.7834	43.4019	52.5722
1059	8.89681	15.2398	6.29835	16.8552	8.33304	8.0983	8.22007	14.3708	10.3741	11.1304	14.0411	23.2175	26.0316	28.2482	12.0085	17.2756	27.2346	32.6019	29.6469	23.9437	15.7484	11.6502	13.6916	17.3543	7.60152	36.6285	18.9901	21.8935	12.0253	14.7234	30.8332	25.8053	21.9941	17.5969	17.8142	18.6518	31.8106	43.3986	52.586
1060	8.89787	15.2395	6.29859	16.8511	8.3295	8.09371	8.21616	14.3631	10.3724	11.1228	14.0416	23.2169	26.0439	28.2417	12.0046	17.2901	27.2258	32.6047	29.6798	23.9638	15.7677	11.6667	13.7166	17.3763	7.59993	36.6085	18.9802	21.8912	12.0395	14.7397	30.8474	25.7923	22.0334	17.5889	17.81	18.6676	31.8361	43.394	52.5986
1061	8.89894	15.239	6.29901	16.8458	8.32601	8.08872	8.21143	14.3568	10.3697	11.1142	14.0425	23.2176	26.0562	28.236	12.0014	17.3037	27.2173	32.61	29.7128	23.9839	15.7865	11.6834	13.7421	17.3983	7.598	36.5867	18.9694	21.8887	12.0525	14.7555	30.8611	25.779	22.0721	17.5807	17.8071	18.6839	31.8604	43.389	52.6113
1062	8.90085	15.2368	6.29998	16.8387	8.32306	8.084	8.20876	14.3491	10.3684	11.1056	14.0432	23.2204	26.071	28.2288	11.9985	17.3167	27.2072	32.6107	29.7464	24.0037	15.8054	11.7005	13.7666	17.4206	7.59827	36.5697	18.9595	21.8872	12.0676	14.7705	30.8771	25.7653	22.1124	17.5736	17.8036	18.7006	31.8854	43.383	52.6194
1063	8.90085	15.2316	6.29941	16.8298	8.32028	8.08188	8.20556	14.341	10.3672	11.098	14.0435	23.2206	26.0844	28.2196	11.9955	17.3295	27.1976	32.6094	29.7816	24.0216	15.8246	11.716	13.7922	17.4455	7.59813	36.5501	18.9492	21.8856	12.0839	14.7863	30.8939	25.7505	22.1537	17.5669	17.8001	18.7181	31.9095	43.3756	52.6248
1064	8.90436	15.2256	6.29787	16.8215	8.31796	8.07801	8.19896	14.3337	10.3641	11.0896	14.0436	23.2213	26.0995	28.2134	11.9925	17.3411	27.1896	32.6094	29.8152	24.0407	15.8423	11.7301	13.8186	17.4688	7.60018	36.5285	18.9386	21.884	12.0961	14.8006	30.9079	25.7361	22.1946	17.5614	17.797	18.7353	31.9344	43.3678	52.6276
1065	8.90596	15.2193	6.29883	16.8113	8.31506	8.07284	8.19547	14.3258	10.3621	11.0821	14.0447	23.2221	26.1168	28.2078	11.989	17.3523	27.1815	32.6123	29.8497	24.061	15.8594	11.7458	13.8445	17.4903	7.60337	36.5101	18.9313	21.8852	12.1084	14.816	30.922	25.7242	22.2348	17.5552	17.794	18.7526	31.9596	43.3589	52.6269
1066	8.90702	15.2114	6.30015	16.7991	8.31182	8.0678	8.19274	14.3179	10.3609	11.076	14.0458	23.2212	26.1334	28.2005	11.9861	17.363	27.1753	32.6158	29.8856	24.0805	15.8779	11.7618	13.8707	17.5136	7.60316	36.4908	18.9244	21.885	12.1216	14.832	30.9365	25.7135	22.276	17.5452	17.7919	18.7704	31.9864	43.3497	52.6246
1067	8.90947	15.2026	6.30056	16.7867	8.30849	8.06279	8.18912	14.3106	10.3587	11.0687	14.0465	23.2218	26.1478	28.1953	11.9839	17.3717	27.17	32.6204	29.9194	24.1003	15.8971	11.777	13.8968	17.5365	7.60139	36.4712	18.9172	21.8855	12.1343	14.8453	30.9473	25.7022	22.3183	17.5347	17.7905	18.7879	32.0122	43.3398	52.6189
1068	8.91223	15.1932	6.30081	16.7729	8.30478	8.05862	8.19031	14.3036	10.3571	11.0621	14.0481	23.2225	26.1608	28.191	11.9809	17.3796	27.1643	32.6285	29.9555	24.1209	15.9167	11.7934	13.9227	17.5604	7.60122	36.455	18.9103	21.8882	12.1501	14.8588	30.9592	25.6918	22.3597	17.526	17.7871	18.8062	32.0384	43.3294	52.6134
1069	8.91372	15.1821	6.30121	16.7576	8.30281	8.05503	8.19179	14.2972	10.3554	11.0561	14.0486	23.222	26.1747	28.1848	11.9784	17.3889	27.1583	32.6358	29.9914	24.1406	15.9362	11.8099	13.9496	17.5861	7.60225	36.4379	18.9017	21.8884	12.1672	14.8708	30.9738	25.6818	22.4008	17.5164	17.7821	18.8245	32.0647	43.3198	52.607
1070	8.91691	15.1704	6.30233	16.7426	8.30132	8.05218	8.19218	14.2919	10.3535	11.0485	14.0486	23.2208	26.1889	28.1787	11.9763	17.3976	27.1519	32.6437	30.0249	24.1596	15.9551	11.8263	13.9788	17.6094	7.60321	36.4206	18.8922	21.8886	12.1826	14.8807	30.9875	25.6694	22.4413	17.5081	17.778	18.8428	32.0911	43.311	52.6
1071	8.92043	15.1589	6.30385	16.7261	8.29791	8.04829	8.19195	14.2859	10.3521	11.0423	14.0503	23.219	26.2053	28.1737	11.9735	17.4058	27.1467	32.6541	30.0627	24.1794	15.9732	11.8429	14.0079	17.6329	7.60356	36.4062	18.8836	21.8908	12.1974	14.893	31.0029	25.6577	22.4831	17.5023	17.7747	18.8615	32.1195	43.3026	52.5945
1072	8.92106	15.147	6.3049	16.7078	8.29438	8.044	8.18891	14.2777	10.3518	11.0359	14.0514	23.2177	26.2238	28.1683	11.9711	17.4154	27.1427	32.6621	30.1002	24.1977	15.9909	11.8583	14.0358	17.6585	7.60302	36.3898	18.8772	21.8931	12.2129	14.9063	31.018	25.6472	22.5255	17.496	17.7703	18.8795	32.1474	43.2958	52.5905
1073	8.92394	15.1351	6.3057	16.6904	8.2911	8.04143	8.18507	14.2691	10.35	11.0277	14.0513	23.2161	26.2399	28.1643	11.9689	17.4239	27.1397	32.6702	30.1347	24.2161	16.0095	11.8737	14.0632	17.6843	7.60256	36.3733	18.8723	21.8954	12.2287	14.9195	31.0297	25.6353	22.5671	17.4892	17.7663	18.8974	32.176	43.2899	52.5902
1074	8.92681	15.1237	6.30674	16.6721	8.28758	8.03883	8.18091	14.261	10.3475	11.0202	14.0519	23.2158	26.2523	28.1622	11.9661	17.4324	27.1369	32.6818	30.172	24.2353	16.0293	11.89	14.0898	17.7101	7.60173	36.3621	18.867	21.8984	12.2438	14.9342	31.04	25.6256	22.609	17.482	17.765	18.9152	32.2053	43.2837	52.5905
1075	8.92915	15.1147	6.30786	16.6556	8.28497	8.03541	8.17738	14.2536	10.3459	11.0127	14.0517	23.2153	26.2658	28.1578	11.9636	17.4441	27.1343	32.6929	30.2096	24.2541	16.0487	11.9063	14.1175	17.7356	7.60114	36.3492	18.861	21.9018	12.2594	14.9507	31.0501	25.6156	22.6516	17.4751	17.7631	18.933	32.2348	43.2807	52.5969
1076	8.93234	15.1059	6.30966	16.6404	8.28479	8.03236	8.17427	14.247	10.3448	11.0047	14.0497	23.2146	26.2762	28.1522	11.9609	17.4578	27.1324	32.7041	30.2467	24.2729	16.0686	11.9233	14.1455	17.7603	7.60213	36.333	18.854	21.9055	12.276	14.9682	31.0588	25.6064	22.6942	17.4681	17.7604	18.9507	32.2638	43.2791	52.6069
1077	8.93585	15.101	6.3106	16.6262	8.28244	8.02838	8.17123	14.2402	10.3423	10.9968	14.0488	23.2137	26.2912	28.1476	11.9587	17.4731	27.1309	32.7185	30.2844	24.2929	16.0876	11.9401	14.1742	17.7854	7.60261	36.3216	18.8482	21.9093	12.2919	14.9873	31.0682	25.5961	22.7371	17.4608	17.7578	18.9683	32.2948	43.2803	52.6216
1078	8.94085	15.0986	6.31146	16.6124	8.27983	8.02276	8.16798	14.2342	10.3394	10.9888	14.0484	23.2135	26.3088	28.1426	11.9568	17.4903	27.1299	32.7355	30.3241	24.313	16.1063	11.9574	14.2036	17.8103	7.60248	36.3135	18.8421	21.9131	12.3078	15.0078	31.0778	25.5858	22.7809	17.4532	17.7563	18.9861	32.3271	43.2845	52.6405
1079	8.94426	15.099	6.31178	16.6003	8.27546	8.01799	8.16647	14.2276	10.3375	10.9818	14.0479	23.2129	26.3278	28.1357	11.9555	17.5102	27.1283	32.7497	30.3629	24.3339	16.1242	11.9729	14.2342	17.8369	7.60165	36.3042	18.837	21.9177	12.3236	15.0304	31.0873	25.5752	22.8245	17.4466	17.7538	19.0032	32.3589	43.2908	52.6638
1080	8.94904	15.1026	6.311	16.5896	8.27139	8.01472	8.1638	14.2195	10.3353	10.9756	14.0476	23.2104	26.3444	28.132	11.9544	17.5305	27.126	32.7635	30.4003	24.3536	16.1423	11.9894	14.2648	17.862	7.6028	36.2957	18.8321	21.9223	12.3387	15.0551	31.0963	25.5627	22.8678	17.4402	17.7497	19.0197	32.3924	43.2971	52.6924
1081	8.95394	15.1079	6.31019	16.58	8.26685	8.01041	8.15979	14.2116	10.3338	10.9687	14.0479	23.2089	26.3595	28.1306	11.9523	17.5513	27.1243	32.7818	30.44	24.3733	16.1616	12.0066	14.294	17.8867	7.60328	36.293	18.8281	21.9286	12.3532	15.0806	31.106	25.5533	22.9102	17.4334	17.7467	19.0357	32.4251	43.3046	52.7233
1082	8.95755	15.1144	6.31019	16.5718	8.26179	8.00534	8.15811	14.2038	10.3317	10.9612	14.048	23.2067	26.372	28.1255	11.9494	17.5737	27.1236	32.8003	30.4801	24.3941	16.1815	12.022	14.3232	17.9132	7.60114	36.2863	18.8241	21.9354	12.3669	15.1084	31.1151	25.5443	22.9534	17.4269	17.745	19.0516	32.4581	43.3136	52.7576
1083	8.96245	15.1227	6.30943	16.5651	8.25778	8.0001	8.1541	14.1953	10.3292	10.954	14.0479	23.2039	26.3835	28.1218	11.9468	17.5979	27.1247	32.8215	30.5202	24.4123	16.2016	12.0381	14.3528	17.9391	7.60077	36.2773	18.8196	21.9409	12.3808	15.1391	31.1244	25.5328	22.9975	17.4207	17.7424	19.0675	32.4925	43.3226	52.7933
1084	8.96649	15.1317	6.30871	16.5602	8.25346	7.99464	8.14868	14.1873	10.3255	10.9463	14.0466	23.2023	26.3969	28.1198	11.9434	17.6234	27.1288	32.8456	30.561	24.4311	16.2213	12.0541	14.3819	17.9656	7.60094	36.2698	18.815	21.9483	12.3961	15.1705	31.136	25.5235	23.0415	17.4137	17.7403	19.083	32.5265	43.3323	52.8286
1085	8.97	15.141	6.30868	16.5555	8.24876	7.98974	8.14566	14.1791	10.3205	10.9381	14.0453	23.2001	26.4119	28.1149	11.9391	17.6492	27.1325	32.8675	30.6011	24.4538	16.2404	12.0699	14.4117	17.9932	7.59922	36.2619	18.8098	21.9564	12.4119	15.2016	31.1456	25.5156	23.087	17.4061	17.7393	19.0987	32.5619	43.3435	52.8671
1086	8.9733	15.1512	6.30806	16.5517	8.24427	7.98506	8.14105	14.1709	10.3164	10.9305	14.0442	23.1991	26.4269	28.1115	11.9353	17.6747	27.1329	32.8877	30.6401	24.4753	16.2595	12.0871	14.4425	18.0196	7.59889	36.2553	18.8046	21.963	12.4295	15.2329	31.1544	25.5053	23.131	17.398	17.7377	19.1139	32.597	43.3555	52.9059
1087	8.97883	15.1607	6.30695	16.5488	8.23958	7.98042	8.13576	14.1626	10.3132	10.923	14.0422	23.1976	26.442	28.1084	11.9315	17.6982	27.1323	32.9054	30.6785	24.4965	16.279	12.1048	14.4734	18.0443	7.59738	36.2502	18.799	21.9707	12.4479	15.262	31.1672	25.495	23.1735	17.3899	17.7359	19.1284	32.6313	43.3681	52.9446
1088	8.98287	15.1701	6.30582	16.5457	8.23479	7.97541	8.1315	14.154	10.3101	10.9148	14.0405	23.1955	26.457	28.1048	11.9285	17.7218	27.1345	32.9269	30.7178	24.5197	16.2996	12.1222	14.5049	18.0706	7.59605	36.2461	18.7943	21.9789	12.4642	15.2904	31.1795	25.4849	23.2182	17.3829	17.734	19.1429	32.6662	43.3814	52.9841
1089	8.98649	15.1801	6.30435	16.5419	8.22946	7.97008	8.12849	14.1452	10.3078	10.906	14.0396	23.1931	26.4712	28.0998	11.9261	17.745	27.1378	32.9511	30.7567	24.5454	16.321	12.1399	14.5375	18.0979	7.59345	36.2435	18.791	21.987	12.4793	15.3173	31.1917	25.4735	23.2633	17.3766	17.7318	19.1568	32.6996	43.3937	53.0226
1090	8.99053	15.1882	6.30306	16.5392	8.22423	7.96396	8.12428	14.1362	10.3044	10.8971	14.0372	23.1911	26.4865	28.0968	11.9236	17.7676	27.1406	32.9747	30.7971	24.5697	16.3426	12.1569	14.5694	18.125	7.59313	36.2396	18.7871	21.9955	12.4945	15.345	31.205	25.4634	23.309	17.3698	17.7297	19.1707	32.7332	43.4056	53.0607
1091	8.99489	15.1952	6.30184	16.5369	8.21896	7.95719	8.12006	14.1266	10.3001	10.8874	14.0331	23.1888	26.5041	28.0952	11.9218	17.7903	27.1451	33.0009	30.8384	24.5952	16.3648	12.1729	14.601	18.1522	7.595	36.2362	18.7829	22.0049	12.5076	15.3725	31.2195	25.4542	23.3577	17.3638	17.7275	19.1846	32.7664	43.4166	53.0984
1092	8.99957	15.2019	6.30074	16.5355	8.21418	7.95105	8.11517	14.1173	10.2969	10.8782	14.0307	23.1857	26.5182	28.0927	11.9188	17.8119	27.1493	33.0253	30.8802	24.6193	16.3876	12.1902	14.6334	18.1802	7.59493	36.2336	18.7792	22.0147	12.5225	15.3993	31.2336	25.4456	23.4043	17.357	17.7252	19.1979	32.8001	43.4274	53.1362
1093	9.00234	15.2072	6.29962	16.5347	8.20969	7.94442	8.1093	14.1074	10.2936	10.8687	14.0283	23.1825	26.5306	28.0906	11.9149	17.8324	27.153	33.0486	30.9235	24.643	16.4107	12.2077	14.666	18.2091	7.59529	36.2306	18.7759	22.0248	12.5376	15.4262	31.2469	25.4378	23.4506	17.3498	17.7227	19.2107	32.8336	43.4378	53.1728
1094	9.00574	15.2127	6.29879	16.5346	8.20494	7.93776	8.10463	14.0984	10.2907	10.8603	14.0263	23.1793	26.5446	28.0875	11.9113	17.8521	27.1556	33.0708	30.9648	24.6657	16.4344	12.226	14.6988	18.2368	7.59383	36.2282	18.7721	22.0345	12.5545	15.452	31.263	25.4303	23.4956	17.3418	17.7208	19.2241	32.8679	43.4493	53.2085
1095	9.01032	15.2183	6.2984	16.5343	8.1998	7.93289	8.09823	14.0895	10.2882	10.8523	14.0246	23.1737	26.5561	28.0842	11.9076	17.8719	27.1593	33.0948	31.007	24.6862	16.4592	12.2439	14.7318	18.2652	7.59154	36.2275	18.7689	22.044	12.5722	15.4764	31.2793	25.422	23.5387	17.3345	17.719	19.2372	32.9017	43.4608	53.2416
1096	9.01319	15.223	6.29707	16.5339	8.19482	7.92779	8.09359	14.08	10.286	10.8448	14.0241	23.1705	26.5679	28.0803	11.9044	17.8911	27.1652	33.1174	31.0504	24.7083	16.4844	12.262	14.7656	18.2949	7.58941	36.2242	18.7658	22.0546	12.5886	15.5001	31.2956	25.4141	23.5824	17.3278	17.7177	19.2503	32.9357	43.4719	53.2738
1097	9.01628	15.2271	6.2961	16.533	8.1899	7.92171	8.09273	14.071	10.2824	10.8374	14.0227	23.1697	26.5845	28.0771	11.9018	17.9118	27.1714	33.1414	31.091	24.7322	16.5093	12.2807	14.7986	18.3242	7.58802	36.2193	18.7629	22.0651	12.6056	15.524	31.3138	25.4075	23.6296	17.3202	17.7171	19.264	32.969	43.4825	53.3051
1098	9.02043	15.2309	6.29502	16.5334	8.1844	7.91651	8.08799	14.062	10.278	10.829	14.02	23.1679	26.6012	28.0761	11.8994	17.9322	27.1764	33.1675	31.1323	24.7557	16.5339	12.2983	14.8315	18.3533	7.58752	36.2157	18.7614	22.0755	12.6224	15.5482	31.3326	25.3998	23.6767	17.314	17.7158	19.2768	33.0003	43.4929	53.3341
1099	9.02394	15.2349	6.29326	16.5351	8.17988	7.91135	8.08238	14.052	10.2747	10.8203	14.0177	23.167	26.6175	28.0759	11.8964	17.9522	27.1826	33.1921	31.1738	24.7804	16.5585	12.3164	14.867	18.3838	7.58725	36.2125	18.7603	22.0869	12.6376	15.5727	31.352	25.3925	23.7237	17.3073	17.7133	19.2893	33.0328	43.5027	53.3639
1100	9.02723	15.2392	6.29282	16.5366	8.17556	7.90551	8.07914	14.0427	10.272	10.813	14.0166	23.1653	26.6318	28.0747	11.8933	17.9735	27.1881	33.2184	31.2161	24.8051	16.583	12.3353	14.9025	18.4148	7.58563	36.2115	18.7594	22.0995	12.6535	15.5979	31.3726	25.3875	23.7723	17.299	17.7121	19.3023	33.0652	43.5107	53.3935
1101	9.03096	15.2444	6.29284	16.5383	8.17032	7.90024	8.07425	14.0354	10.2682	10.806	14.0155	23.1621	26.6446	28.0723	11.8909	17.9945	27.194	33.2444	31.2613	24.8309	16.6082	12.353	14.9379	18.4455	7.58463	36.2106	18.759	22.1117	12.6686	15.6227	31.393	25.3811	23.8204	17.2919	17.7108	19.3146	33.0962	43.5191	53.4209
1102	9.03436	15.2496	6.29246	16.5403	8.16535	7.89535	8.07039	14.027	10.2641	10.7988	14.014	23.1597	26.6603	28.0702	11.888	18.0152	27.2018	33.2657	31.3069	24.8579	16.6346	12.3709	14.9742	18.4757	7.58425	36.2098	18.7577	22.124	12.6831	15.647	31.4138	25.3736	23.8675	17.2847	17.7091	19.3267	33.1294	43.5293	53.4509
1103	9.0383	15.2554	6.29197	16.5422	8.16044	7.8901	8.06771	14.0185	10.2608	10.7915	14.0126	23.1573	26.6759	28.0691	11.8856	18.037	27.209	33.2887	31.3506	24.8828	16.6603	12.3896	15.0098	18.5061	7.58383	36.2087	18.7571	22.1379	12.6993	15.6726	31.4346	25.3681	23.9155	17.2779	17.7079	19.3393	33.1626	43.5394	53.4817
1104	9.04096	15.2618	6.29095	16.5438	8.15534	7.88442	8.06804	14.0112	10.2577	10.7843	14.0115	23.1548	26.6935	28.0682	11.8839	18.0599	27.2177	33.3112	31.3931	24.9073	16.6858	12.4093	15.0437	18.536	7.58374	36.2051	18.7566	22.1534	12.7164	15.6984	31.456	25.3641	23.9655	17.2718	17.7072	19.3518	33.1957	43.5501	53.5136
1105	9.04532	15.2689	6.29093	16.546	8.15043	7.87901	8.06603	14.003	10.2544	10.7766	14.0102	23.1532	26.7089	28.0678	11.8818	18.0825	27.2254	33.335	31.4367	24.933	16.7117	12.4282	15.0797	18.5666	7.58394	36.2057	18.7562	22.1677	12.7337	15.725	31.4764	25.3589	24.0141	17.2656	17.7062	19.3642	33.2295	43.5609	53.5474
1106	9.05011	15.2763	6.29132	16.5484	8.14596	7.87397	8.06379	13.9934	10.2509	10.7682	14.0087	23.1523	26.723	28.0698	11.8797	18.1051	27.2317	33.3596	31.4785	24.9565	16.7374	12.4465	15.1163	18.5976	7.58432	36.2112	18.7559	22.1827	12.7533	15.7533	31.4965	25.354	24.0607	17.2595	17.7051	19.3766	33.2646	43.5725	53.5835
1107	9.05543	15.2845	6.29177	16.5509	8.1411	7.86856	8.06047	13.9845	10.2483	10.761	14.007	23.1508	26.7378	28.0692	11.8775	18.1287	27.2385	33.3839	31.5227	24.9817	16.7635	12.4658	15.1534	18.629	7.58422	36.2119	18.7561	22.1971	12.7707	15.7808	31.5162	25.3493	24.1099	17.2536	17.7041	19.3891	33.2979	43.5828	53.619
1108	9.06096	15.2941	6.29335	16.5539	8.13541	7.86212	8.05556	13.9755	10.2456	10.7548	14.0048	23.1498	26.7519	28.0665	11.8747	18.1522	27.2456	33.4089	31.57	25.0107	16.7906	12.4848	15.1923	18.6599	7.58422	36.2117	18.7558	22.2095	12.7865	15.8076	31.5351	25.3435	24.1614	17.2476	17.7033	19.4011	33.3309	43.5949	53.657
1109	9.06543	15.3029	6.29434	16.5569	8.13081	7.85749	8.05206	13.9671	10.2435	10.7478	14.0031	23.1482	26.7671	28.0651	11.8726	18.1765	27.2528	33.4333	31.6159	25.0382	16.817	12.5045	15.23	18.6921	7.58421	36.2133	18.7567	22.2239	12.8036	15.8358	31.5545	25.339	24.2108	17.2414	17.7026	19.4125	33.3646	43.6089	53.6962
1110	9.07128	15.312	6.29529	16.5601	8.1267	7.85416	8.04815	13.9587	10.2427	10.7408	14.0012	23.146	26.7836	28.0631	11.8709	18.2015	27.259	33.4569	31.6614	25.065	16.8432	12.5249	15.2666	18.7255	7.58331	36.2135	18.7587	22.2388	12.82	15.8646	31.5737	25.335	24.2596	17.2355	17.7015	19.4236	33.3974	43.6239	53.7373
1111	9.07574	15.3209	6.29483	16.5634	8.12254	7.84958	8.04517	13.9511	10.2415	10.734	14.0005	23.1437	26.8002	28.0621	11.8694	18.2278	27.2674	33.4812	31.7076	25.0908	16.8694	12.5468	15.3049	18.7588	7.58393	36.2115	18.7602	22.2552	12.8376	15.8938	31.5936	25.3327	24.3103	17.2294	17.7017	19.4355	33.4319	43.6401	53.7824
1112	9.08106	15.3297	6.29556	16.567	8.11901	7.84619	8.04249	13.9445	10.239	10.7271	14.0001	23.1422	26.815	28.0624	11.8676	18.2536	27.2772	33.5058	31.7538	25.1188	16.8954	12.5678	15.3439	18.7905	7.58532	36.2154	18.7622	22.2719	12.8567	15.9241	31.6142	25.33	24.3593	17.223	17.7015	19.4473	33.4672	43.6558	53.8286
1113	9.08564	15.3392	6.29617	16.5706	8.11556	7.84321	8.0397	13.938	10.2357	10.7202	13.9993	23.1422	26.8291	28.0635	11.8663	18.2794	27.2868	33.5293	31.7982	25.1432	16.9202	12.5875	15.3822	18.8241	7.5856	36.2217	18.7642	22.289	12.8758	15.9548	31.6335	25.3257	24.4082	17.2173	17.7003	19.4589	33.5017	43.6714	53.8757
1114	9.09011	15.3494	6.29656	16.5738	8.11097	7.83852	8.03663	13.9302	10.2321	10.7134	13.9991	23.141	26.8453	28.0642	11.8645	18.3049	27.2966	33.553	31.846	25.1685	16.9461	12.6082	15.4226	18.8578	7.58654	36.2242	18.7675	22.3074	12.8944	15.9846	31.653	25.322	24.4596	17.2122	17.7	19.4707	33.5366	43.6882	53.9244
1115	9.09479	15.3595	6.29879	16.5775	8.10636	7.83381	8.03318	13.9221	10.2308	10.7068	13.9988	23.1387	26.8616	28.0643	11.863	18.3306	27.3059	33.5758	31.8946	25.1948	16.9737	12.6287	15.4635	18.8891	7.58715	36.2251	18.7711	22.3261	12.9117	16.0141	31.673	25.3179	24.5096	17.2066	17.6989	19.4813	33.5701	43.7049	53.9723
1116	9.10096	15.3691	6.30007	16.5805	8.10198	7.83028	8.03135	13.9141	10.2307	10.6998	13.9967	23.1376	26.8786	28.0645	11.8617	18.3565	27.3141	33.5972	31.9415	25.2192	17.0008	12.6479	15.5027	18.9215	7.58687	36.2246	18.7744	22.343	12.9294	16.0438	31.6903	25.3126	24.5605	17.199	17.6977	19.4919	33.6037	43.7225	54.02
1117	9.10574	15.3778	6.30077	16.5827	8.09802	7.82621	8.0314	13.9054	10.2297	10.6922	13.9955	23.1352	26.8975	28.0651	11.8605	18.3824	27.3228	33.6187	31.9902	25.2456	17.0279	12.6684	15.5424	18.9553	7.58632	36.2248	18.779	22.3615	12.948	16.0734	31.7078	25.3091	24.6126	17.1918	17.6973	19.5026	33.6382	43.7398	54.0673
1118	9.11043	15.3864	6.30219	16.5853	8.09398	7.82161	8.02899	13.8975	10.2283	10.6855	13.9943	23.1335	26.9161	28.0654	11.8594	18.4082	27.3322	33.6389	32.0381	25.271	17.0544	12.6884	15.5824	18.988	7.58644	36.2271	18.7823	22.3794	12.966	16.1022	31.7258	25.3063	24.6633	17.1853	17.6968	19.5127	33.6715	43.756	54.1128
1119	9.11553	15.3949	6.30371	16.5881	8.09021	7.81659	8.02573	13.8907	10.227	10.6803	13.9924	23.1333	26.9351	28.0659	11.8588	18.4345	27.3427	33.6568	32.0843	25.2961	17.0801	12.7073	15.6221	19.0193	7.58647	36.2317	18.7844	22.3961	12.9841	16.1306	31.7431	25.3039	24.7134	17.1785	17.696	19.5233	33.7053	43.7726	54.1577
1120	9.12011	15.4023	6.30475	16.5903	8.08644	7.81255	8.02265	13.8829	10.2245	10.6736	13.991	23.1319	26.9528	28.0664	11.8575	18.4598	27.3523	33.6765	32.1325	25.3207	17.1062	12.7273	15.6626	19.0522	7.58723	36.2343	18.7873	22.414	13.0028	16.1593	31.7603	25.3014	24.7647	17.1719	17.6962	19.5338	33.7391	43.7884	54.2004
1121	9.12468	15.4092	6.30603	16.593	8.08291	7.8083	8.01761	13.8745	10.2204	10.6655	13.991	23.1293	26.9704	28.0665	11.8564	18.4847	27.3618	33.6962	32.1826	25.3438	17.1323	12.7477	15.7044	19.0855	7.5885	36.2381	18.7897	22.433	13.0212	16.1874	31.7791	25.3007	24.8149	17.166	17.6981	19.5439	33.7722	43.8036	54.2414
1122	9.12936	15.4159	6.30756	16.5945	8.07886	7.80438	8.01388	13.8667	10.218	10.6593	13.9899	23.1275	26.9882	28.067	11.8547	18.5096	27.3716	33.7162	32.231	25.3689	17.1588	12.7684	15.7454	19.119	7.59001	36.2399	18.7936	22.4515	13.0396	16.2156	31.7955	25.2983	24.8661	17.1603	17.698	19.5537	33.8042	43.8181	54.2808
1123	9.13404	15.4218	6.30861	16.5948	8.07448	7.80136	8.01133	13.859	10.2154	10.6536	13.9875	23.1259	27.0039	28.0681	11.8516	18.534	27.3813	33.7367	32.2791	25.3933	17.1861	12.79	15.7858	19.1538	7.59276	36.2383	18.7981	22.4707	13.0592	16.2448	31.8095	25.2942	24.9194	17.1543	17.6967	19.5635	33.837	43.8326	54.3196
1124	9.13851	15.4276	6.30999	16.5958	8.0706	7.79798	8.00908	13.8511	10.2135	10.6472	13.9863	23.1243	27.0219	28.0685	11.85	18.5584	27.391	33.7567	32.3274	25.42	17.2124	12.811	15.8273	19.1875	7.59392	36.2392	18.8031	22.489	13.0779	16.2726	31.8255	25.2916	24.9714	17.1488	17.6965	19.5729	33.8694	43.8457	54.3562
1125	9.14298	15.4335	6.31205	16.5963	8.06641	7.79423	8.007	13.8439	10.2135	10.642	13.9854	23.1223	27.043	28.0675	11.8491	18.5825	27.4008	33.7785	32.375	25.4512	17.2378	12.8321	15.8693	19.221	7.59426	36.2415	18.8109	22.506	13.0957	16.2991	31.8412	25.2894	25.0225	17.1451	17.6955	19.5821	33.9015	43.8588	54.3911
1126	9.14766	15.439	6.31373	16.5971	8.06256	7.79055	8.00532	13.8364	10.212	10.6363	13.9842	23.1212	27.0618	28.0683	11.8478	18.6068	27.4113	33.7974	32.4234	25.4787	17.2642	12.8528	15.9112	19.2539	7.59545	36.2428	18.8159	22.5249	13.114	16.3261	31.8572	25.2871	25.0744	17.1396	17.6951	19.5906	33.934	43.8712	54.4249
1127	9.15213	15.4438	6.31496	16.5984	8.05909	7.78692	8.00557	13.8287	10.2101	10.6297	13.9833	23.1207	27.0796	28.0693	11.8466	18.6312	27.4225	33.8142	32.4731	25.5048	17.2911	12.8728	15.9534	19.2857	7.59675	36.2429	18.8185	22.5436	13.1326	16.3524	31.8745	25.2848	25.1262	17.1327	17.6956	19.5996	33.9655	43.883	54.4554
1128	9.1567	15.4487	6.31671	16.5993	8.05623	7.78413	8.00264	13.8209	10.2068	10.6229	13.9828	23.12	27.0979	28.0713	11.8459	18.6556	27.4323	33.8315	32.5213	25.5312	17.3176	12.8929	15.9962	19.3177	7.59679	36.2463	18.8228	22.5634	13.151	16.3796	31.892	25.2838	25.1786	17.1261	17.6969	19.6093	33.9982	43.8953	54.4841
1129	9.16117	15.4538	6.31814	16.6001	8.05295	7.78019	7.99967	13.8136	10.2053	10.6168	13.9807	23.1188	27.1175	28.0745	11.8445	18.6799	27.4437	33.8485	32.5688	25.5559	17.3447	12.9124	16.0393	19.3497	7.59763	36.2474	18.8274	22.5849	13.1692	16.4069	31.9066	25.2822	25.2327	17.1195	17.6968	19.6187	34.031	43.9064	54.5122
1130	9.16532	15.4586	6.3197	16.6011	8.04923	7.77614	7.99785	13.8057	10.2041	10.61	13.9796	23.1183	27.1356	28.0778	11.8433	18.7039	27.4531	33.8648	32.618	25.5802	17.3716	12.9328	16.0806	19.3838	7.59943	36.2478	18.8315	22.6053	13.1872	16.4339	31.9227	25.2811	25.2855	17.1128	17.6971	19.6284	34.0625	43.9175	54.5395
1131	9.16936	15.4631	6.32119	16.6005	8.04521	7.7728	7.99524	13.7986	10.2024	10.604	13.9797	23.1168	27.1534	28.0797	11.8426	18.7279	27.4625	33.8822	32.6679	25.6068	17.3977	12.9542	16.1213	19.4187	7.60022	36.2514	18.8389	22.6252	13.205	16.4607	31.9395	25.2808	25.3378	17.1083	17.6984	19.638	34.0951	43.929	54.5667
1132	9.17436	15.4671	6.32294	16.6003	8.0412	7.76936	7.99385	13.7918	10.2019	10.5978	13.9792	23.1146	27.1737	28.0806	11.8417	18.7517	27.4746	33.9004	32.7183	25.6324	17.4236	12.9755	16.1635	19.4516	7.60052	36.2525	18.847	22.6439	13.2239	16.4867	31.9547	25.2801	25.3908	17.1034	17.6993	19.6468	34.1259	43.9395	54.5921
1133	9.17894	15.4713	6.32506	16.6009	8.03789	7.76592	7.99297	13.7845	10.2013	10.5922	13.9786	23.1128	27.1924	28.0818	11.841	18.7751	27.4851	33.9178	32.7676	25.6589	17.4501	12.9966	16.2064	19.4851	7.60142	36.2548	18.854	22.6638	13.243	16.5132	31.9704	25.2786	25.444	17.0975	17.6995	19.6553	34.1564	43.9501	54.6153
1134	9.18468	15.4754	6.32767	16.6016	8.03479	7.76307	7.99356	13.777	10.2004	10.5879	13.9786	23.111	27.2106	28.0821	11.8402	18.7981	27.4955	33.9352	32.8173	25.6861	17.4771	13.0186	16.2497	19.5184	7.60288	36.2585	18.8606	22.6837	13.263	16.5395	31.987	25.2759	25.4966	17.0914	17.6992	19.6636	34.1881	43.9609	54.6381
1135	9.18862	15.4793	6.33004	16.602	8.03176	7.75944	7.99272	13.7699	10.199	10.5827	13.9785	23.1094	27.2275	28.0831	11.8395	18.8217	27.5067	33.9505	32.8662	25.7125	17.5037	13.0397	16.2927	19.5521	7.60364	36.2603	18.8678	22.7044	13.282	16.5658	32.003	25.2749	25.5501	17.0853	17.6998	19.6717	34.2189	43.9711	54.6603
1136	9.19223	15.4826	6.33242	16.6032	8.02929	7.75463	7.9915	13.762	10.1977	10.577	13.978	23.1079	27.2436	28.0843	11.8388	18.845	27.5182	33.9646	32.9134	25.739	17.5307	13.0596	16.3366	19.5864	7.60392	36.2604	18.8747	22.7265	13.3013	16.5924	32.0177	25.2738	25.6052	17.0779	17.6999	19.6801	34.2509	43.9817	54.6833
1137	9.19734	15.4867	6.33507	16.604	8.0268	7.75152	7.99071	13.7555	10.1969	10.572	13.9774	23.1062	27.2607	28.0857	11.8387	18.869	27.5283	33.98	32.9618	25.7654	17.5574	13.0806	16.3801	19.6199	7.60502	36.2622	18.8818	22.7471	13.3198	16.6185	32.0335	25.2731	25.6588	17.0715	17.7008	19.6887	34.2844	43.9927	54.7081
1138	9.20106	15.491	6.33748	16.6042	8.0242	7.74941	7.98948	13.7504	10.1951	10.5669	13.9767	23.1047	27.2769	28.0871	11.8387	18.8939	27.5381	33.9942	33.0118	25.7918	17.5838	13.1025	16.4225	19.6527	7.60614	36.2636	18.8895	22.7666	13.3374	16.644	32.0498	25.2738	25.7118	17.0656	17.7034	19.697	34.3166	44.0033	54.7306
1139	9.20532	15.4952	6.34072	16.6046	8.02173	7.7465	7.98893	13.7446	10.1945	10.562	13.9764	23.1034	27.2933	28.0891	11.8389	18.9182	27.5489	34.0092	33.06	25.8175	17.6104	13.1235	16.4659	19.6862	7.60745	36.2649	18.8962	22.787	13.3552	16.6698	32.0659	25.2737	25.765	17.0603	17.7043	19.7059	34.3496	44.0144	54.7523
1140	9.20989	15.5004	6.34502	16.6049	8.01969	7.74349	7.98933	13.7393	10.1958	10.5583	13.9761	23.1015	27.3105	28.0914	11.8402	18.9426	27.5582	34.0264	33.106	25.8417	17.6371	13.1441	16.5099	19.7195	7.60937	36.2676	18.9022	22.8067	13.373	16.6956	32.0823	25.2728	25.8179	17.0553	17.7043	19.7136	34.3812	44.0249	54.7738
1141	9.21543	15.5049	6.34855	16.6059	8.01755	7.74129	7.98917	13.7338	10.1959	10.5536	13.9755	23.1005	27.328	28.0942	11.8407	18.9667	27.5688	34.0419	33.1541	25.8679	17.6636	13.1653	16.5542	19.7527	7.61113	36.2689	18.909	22.8275	13.3903	16.721	32.0983	25.2724	25.8707	17.0506	17.7048	19.7206	34.4114	44.0351	54.7947
1142	9.22021	15.5087	6.35229	16.607	8.01534	7.7388	7.98855	13.7281	10.1957	10.5484	13.975	23.1008	27.344	28.0985	11.8409	18.9904	27.5824	34.0571	33.2025	25.8947	17.6904	13.1864	16.5991	19.7865	7.61268	36.2679	18.9152	22.8496	13.4067	16.7463	32.1143	25.2721	25.9233	17.0473	17.705	19.7273	34.4417	44.0447	54.8142
1143	9.22415	15.5126	6.3556	16.6078	8.01312	7.73673	7.98835	13.7221	10.1953	10.5433	13.9748	23.0998	27.3616	28.1014	11.8411	19.0142	27.5938	34.0714	33.2509	25.9213	17.7169	13.2077	16.6431	19.8201	7.61443	36.2691	18.9221	22.8712	13.424	16.7712	32.13	25.2719	25.9759	17.0431	17.7055	19.7335	34.4723	44.0542	54.8344
1144	9.2283	15.5165	6.35822	16.609	8.01122	7.73551	7.98806	13.7158	10.1946	10.5381	13.9744	23.0974	27.3818	28.1039	11.8412	19.0376	27.6042	34.0847	33.2999	25.9492	17.7428	13.2296	16.6872	19.8527	7.61682	36.2714	18.9298	22.8934	13.4418	16.7954	32.1452	25.2718	26.0278	17.0384	17.7064	19.7394	34.5027	44.0631	54.8542
1145	9.2317	15.52	6.36077	16.6104	8.00896	7.73531	7.98848	13.7099	10.1942	10.5321	13.9733	23.0972	27.4003	28.1066	11.8407	19.0613	27.6143	34.0985	33.3509	25.9774	17.7695	13.2519	16.7313	19.8859	7.61851	36.2733	18.9378	22.9146	13.4594	16.8198	32.1603	25.2719	26.0808	17.0341	17.707	19.7451	34.5348	44.0727	54.8741
1146	9.23521	15.5231	6.36369	16.6106	8.00606	7.73333	7.98874	13.7043	10.1928	10.5269	13.9731	23.0962	27.4166	28.1095	11.8407	19.0852	27.6239	34.1116	33.3981	26.0032	17.7961	13.2726	16.7745	19.9205	7.61963	36.276	18.9445	22.9357	13.4764	16.8448	32.1765	25.2721	26.1333	17.0286	17.7084	19.7503	34.567	44.0833	54.8953
1147	9.23883	15.5267	6.3677	16.6111	8.0037	7.73051	7.9893	13.6993	10.1913	10.5221	13.9734	23.094	27.4329	28.1127	11.841	19.1093	27.6336	34.1243	33.4443	26.027	17.8222	13.293	16.818	19.9536	7.62138	36.2791	18.9524	22.9568	13.4939	16.8694	32.1919	25.2717	26.1865	17.0231	17.7097	19.7547	34.5987	44.0937	54.9157
1148	9.24213	15.5305	6.37156	16.6123	8.00197	7.7281	7.98866	13.6937	10.1913	10.5172	13.9736	23.093	27.4488	28.1158	11.8411	19.1326	27.6447	34.1388	33.4921	26.0513	17.8482	13.3141	16.8619	19.9868	7.62272	36.2808	18.9599	22.9786	13.5108	16.8936	32.2064	25.2715	26.2391	17.018	17.7109	19.7588	34.6308	44.1038	54.9358
1149	9.24585	15.5344	6.37639	16.6143	8.00075	7.72493	7.98714	13.6888	10.1918	10.5125	13.9741	23.0934	27.4624	28.1199	11.8414	19.1558	27.6567	34.1554	33.5395	26.0746	17.8742	13.335	16.9065	20.0201	7.62343	36.2822	18.9671	23.0006	13.5268	16.9177	32.2205	25.2713	26.2914	17.0126	17.7128	19.7616	34.6615	44.1134	54.9548
1150	9.24979	15.5382	6.37974	16.6154	7.99908	7.72297	7.98638	13.6829	10.1918	10.5077	13.9738	23.0917	27.4785	28.1229	11.8413	19.1789	27.6687	34.1691	33.5871	26.0984	17.8998	13.3557	16.9506	20.0529	7.62513	36.2823	18.9745	23.0228	13.5431	16.9417	32.2345	25.2712	26.3438	17.0079	17.7137	19.7638	34.6927	44.1231	54.9722
1151	9.25277	15.5425	6.38242	16.6168	7.99841	7.72204	7.9845	13.6758	10.1935	10.503	13.9731	23.0893	27.4962	28.125	11.8408	19.2013	27.6822	34.1823	33.6357	26.1212	17.9248	13.3774	16.9945	20.0847	7.62734	36.2804	18.982	23.0457	13.5598	16.9652	32.247	25.2706	26.3961	17.0042	17.7134	19.7656	34.7237	44.1337	54.9909
1152	9.255	15.5459	6.38557	16.6174	7.99612	7.72001	7.98451	13.6697	10.193	10.4978	13.9728	23.0868	27.5124	28.1276	11.8406	19.2244	27.6939	34.1954	33.6838	26.1459	17.9502	13.3978	17.0386	20.1176	7.62906	36.2807	18.9899	23.0681	13.5762	16.9885	32.2609	25.2716	26.4482	16.9995	17.7142	19.7666	34.7543	44.1451	55.0099
1153	9.25862	15.5489	6.38847	16.617	7.99258	7.71818	7.98668	13.6637	10.1906	10.4923	13.9719	23.0829	27.5287	28.1302	11.8405	19.2481	27.705	34.2065	33.7311	26.1723	17.9754	13.417	17.0827	20.1511	7.63143	36.2809	18.9983	23.0904	13.5925	17.012	32.2758	25.2742	26.5003	16.9946	17.7151	19.7672	34.7847	44.156	55.0294
1154	9.26053	15.5517	6.39112	16.6175	7.98954	7.71581	7.9866	13.6578	10.1894	10.4869	13.9712	23.08	27.5448	28.1328	11.8401	19.2711	27.7159	34.2187	33.7785	26.1967	18.001	13.4367	17.1268	20.1836	7.63274	36.2812	19.0059	23.1124	13.6082	17.035	32.2899	25.2747	26.5526	16.9895	17.7164	19.7674	34.8154	44.1678	55.0502
1155	9.26255	15.5539	6.39401	16.6182	7.986	7.71246	7.9866	13.6528	10.188	10.4816	13.9717	23.0776	27.5605	28.1346	11.8397	19.2936	27.7253	34.2325	33.8253	26.2206	18.0275	13.4559	17.1713	20.2165	7.63326	36.2829	19.0138	23.134	13.6237	17.0572	32.304	25.2759	26.6055	16.9835	17.7189	19.7673	34.8454	44.1781	55.0696
1156	9.26447	15.5562	6.39654	16.6185	7.98281	7.70955	7.98611	13.6464	10.1868	10.4758	13.9706	23.0753	27.5758	28.1379	11.839	19.3164	27.7361	34.2442	33.8733	26.2452	18.0524	13.4756	17.2152	20.2484	7.63405	36.284	19.0211	23.156	13.6389	17.0793	32.3181	25.2755	26.6568	16.9783	17.7201	19.7664	34.8751	44.1876	55.0891
1157	9.26489	15.5583	6.39882	16.619	7.98017	7.70675	7.98448	13.6392	10.186	10.4694	13.9679	23.0735	27.5904	28.1429	11.8379	19.3389	27.7474	34.2539	33.9213	26.2692	18.0762	13.4962	17.2588	20.279	7.63476	36.2846	19.0272	23.1779	13.6537	17.1013	32.3323	25.2721	26.7074	16.9742	17.7201	19.766	34.905	44.1973	55.1074
1158	9.26638	15.5604	6.40048	16.6193	7.97695	7.70388	7.98263	13.6322	10.185	10.4636	13.9662	23.0715	27.6057	28.1463	11.8369	19.3614	27.7584	34.2646	33.9692	26.2928	18.1006	13.5158	17.3021	20.3098	7.63502	36.2848	19.034	23.1996	13.6679	17.123	32.3457	25.2706	26.7578	16.9688	17.7212	19.7654	34.9346	44.2061	55.1248
1159	9.26649	15.5627	6.40186	16.6191	7.97348	7.70145	7.97999	13.6245	10.184	10.458	13.9642	23.0699	27.6208	28.1492	11.8359	19.3841	27.7698	34.2746	34.0191	26.3182	18.1238	13.5352	17.3449	20.3394	7.63537	36.2845	19.0409	23.2207	13.6816	17.144	32.3589	25.2699	26.806	16.9628	17.7219	19.7652	34.9642	44.216	55.1414
1160	9.26734	15.5646	6.40316	16.6189	7.9699	7.6982	7.97824	13.6169	10.1825	10.4519	13.9625	23.0675	27.6357	28.1529	11.8347	19.4065	27.7811	34.2854	34.0669	26.3414	18.1478	13.5543	17.3876	20.3702	7.63505	36.2849	19.0479	23.2427	13.6951	17.1651	32.3717	25.2689	26.8553	16.9574	17.7231	19.7652	34.9941	44.2264	55.1585
1161	9.26798	15.5663	6.40354	16.6189	7.96622	7.69456	7.9763	13.6093	10.1816	10.4465	13.9623	23.065	27.651	28.1564	11.8337	19.4285	27.7915	34.2983	34.1118	26.3608	18.1736	13.5726	17.4293	20.4023	7.63344	36.2855	19.0552	23.2658	13.7082	17.1861	32.3833	25.2684	26.9051	16.9512	17.7255	19.7658	35.0232	44.2363	55.1756
1162	9.26872	15.5677	6.40422	16.6186	7.96216	7.69078	7.97447	13.6016	10.1794	10.4405	13.9604	23.0617	27.6659	28.1592	11.8321	19.4503	27.8025	34.3093	34.1586	26.3825	18.1979	13.5909	17.4716	20.433	7.6326	36.2856	19.0622	23.2876	13.7208	17.2069	32.3954	25.2676	26.9549	16.9455	17.7274	19.7671	35.0531	44.2466	55.193
1163	9.26745	15.5689	6.40501	16.6179	7.95789	7.68668	7.97301	13.5939	10.1764	10.434	13.9578	23.058	27.6804	28.1619	11.8302	19.472	27.8139	34.3196	34.2057	26.4048	18.2214	13.609	17.5139	20.4635	7.63191	36.2857	19.0691	23.3091	13.733	17.2275	32.4075	25.2665	27.0049	16.9401	17.7291	19.7691	35.0833	44.2563	55.2109
1164	9.26745	15.5699	6.40624	16.6171	7.95359	7.68188	7.97322	13.586	10.1721	10.4267	13.9542	23.0535	27.6943	28.1655	11.8278	19.4934	27.8258	34.3284	34.2519	26.4277	18.2444	13.6271	17.5562	20.4943	7.63129	36.2872	19.0758	23.331	13.7449	17.248	32.4197	25.2653	27.0551	16.936	17.7304	19.7716	35.1134	44.2654	55.2278
1165	9.26638	15.5705	6.40679	16.6159	7.94887	7.67754	7.97085	13.5777	10.1692	10.4199	13.9514	23.0493	27.7079	28.168	11.8256	19.5144	27.8369	34.3393	34.3	26.4493	18.2671	13.6448	17.5981	20.5242	7.6305	36.2855	19.0825	23.3523	13.7571	17.2679	32.4316	25.2635	27.1045	16.9305	17.7315	19.7749	35.1437	44.2742	55.2438
1166	9.26532	15.571	6.40723	16.6143	7.94333	7.67354	7.96716	13.5693	10.1659	10.4133	13.9476	23.0443	27.7214	28.1684	11.8234	19.5348	27.8482	34.3508	34.3505	26.4718	18.2888	13.6624	17.6401	20.5525	7.63013	36.281	19.0888	23.3719	13.7686	17.2872	32.4437	25.261	27.1535	16.9244	17.7323	19.7789	35.1725	44.2831	55.2593
1167	9.26404	15.5711	6.40726	16.6129	7.9388	7.66886	7.9642	13.5609	10.163	10.4063	13.9452	23.0404	27.7346	28.1711	11.8209	19.5554	27.859	34.3605	34.3979	26.4931	18.3109	13.6796	17.6816	20.5815	7.62928	36.2795	19.0955	23.3933	13.7806	17.3064	32.4548	25.2594	27.2025	16.9186	17.7332	19.7835	35.2012	44.292	55.2743
1168	9.2617	15.571	6.40695	16.6111	7.935	7.6639	7.96043	13.5519	10.1612	10.3992	13.9443	23.0369	27.7468	28.1749	11.8181	19.5753	27.8689	34.3708	34.4439	26.5122	18.333	13.6963	17.722	20.6103	7.62799	36.2776	19.1022	23.4155	13.7939	17.3251	32.4651	25.2581	27.2514	16.9122	17.7333	19.7887	35.2302	44.3006	55.2889
1169	9.25968	15.5709	6.40647	16.6098	7.93	7.65886	7.95728	13.5432	10.1587	10.3919	13.9419	23.0333	27.76	28.1783	11.8158	19.5956	27.8793	34.3801	34.491	26.5329	18.3551	13.7133	17.7628	20.6398	7.62677	36.2765	19.1094	23.4379	13.8054	17.3432	32.4759	25.2562	27.2995	16.9066	17.7347	19.7948	35.2588	44.3087	55.3032
1170	9.2583	15.5703	6.40557	16.6092	7.92448	7.65336	7.95441	13.5347	10.1554	10.3842	13.9394	23.0308	27.7742	28.1828	11.8134	19.6161	27.8893	34.3862	34.5364	26.5539	18.3772	13.7303	17.8034	20.6697	7.62559	36.2783	19.1171	23.4614	13.8161	17.3607	32.486	25.2543	27.3469	16.9014	17.7367	19.8007	35.2877	44.3175	55.3175
1171	9.25532	15.5702	6.40483	16.6076	7.91979	7.64812	7.9519	13.5263	10.1527	10.3771	13.9366	23.0266	27.787	28.1863	11.8111	19.6363	27.8999	34.395	34.5836	26.575	18.3991	13.7473	17.8439	20.6985	7.62426	36.2773	19.1244	23.4835	13.8267	17.3784	32.4971	25.2528	27.3947	16.8962	17.7386	19.8071	35.3175	44.3263	55.3312
1172	9.25447	15.5703	6.40383	16.6055	7.91465	7.64294	7.95016	13.5181	10.1506	10.3702	13.9336	23.0207	27.7998	28.1889	11.8093	19.6563	27.9111	34.4068	34.6327	26.5963	18.421	13.7646	17.884	20.7275	7.62212	36.274	19.1314	23.5052	13.8362	17.3954	32.5094	25.2505	27.4412	16.8913	17.7413	19.8132	35.3463	44.3351	55.3453
1173	9.2517	15.5702	6.40308	16.604	7.90991	7.63777	7.94727	13.5095	10.1479	10.3633	13.9303	23.0167	27.8116	28.1922	11.8071	19.6763	27.9217	34.4154	34.6803	26.6176	18.4426	13.7814	17.9244	20.7554	7.62114	36.2724	19.1389	23.5267	13.8464	17.4128	32.5202	25.249	27.4891	16.8867	17.743	19.8195	35.3754	44.3445	55.36
1174	9.24936	15.5705	6.40242	16.6021	7.90671	7.63255	7.94399	13.5005	10.1448	10.3573	13.926	23.0127	27.8203	28.1947	11.8041	19.6955	27.9324	34.4224	34.7276	26.6407	18.4637	13.7974	17.9652	20.7809	7.62141	36.2698	19.1463	23.5466	13.8566	17.431	32.5306	25.2492	27.5384	16.8826	17.7434	19.8254	35.4032	44.3534	55.3739
1175	9.2467	15.5704	6.4018	16.6005	7.90231	7.62748	7.94117	13.4921	10.1419	10.3501	13.9231	23.0091	27.8322	28.1986	11.8016	19.7156	27.9428	34.4304	34.7743	26.6611	18.485	13.8142	18.0054	20.8081	7.62039	36.2688	19.154	23.5677	13.8671	17.4481	32.5408	25.2481	27.5863	16.8781	17.7452	19.8312	35.4297	44.3621	55.3871
1176	9.24309	15.5695	6.40138	16.5997	7.89672	7.62257	7.93741	13.4835	10.1391	10.3415	13.921	23.0079	27.8462	28.2043	11.799	19.7365	27.9522	34.4363	34.8194	26.6795	18.506	13.8311	18.0447	20.8359	7.61886	36.2704	19.1626	23.5886	13.8787	17.4645	32.5489	25.2464	27.634	16.8738	17.7471	19.8368	35.457	44.3705	55.4011
1177	9.24085	15.5693	6.4008	16.5988	7.89185	7.61762	7.93444	13.4752	10.1358	10.3343	13.9182	23.0047	27.8586	28.2085	11.7967	19.7566	27.9623	34.4443	34.8656	26.699	18.5273	13.8482	18.0847	20.8635	7.61801	36.27	19.1704	23.6106	13.8886	17.481	32.5588	25.2448	27.681	16.8693	17.7494	19.8424	35.484	44.3785	55.4151
1178	9.23819	15.5695	6.3999	16.598	7.88687	7.61268	7.93182	13.4678	10.1316	10.3273	13.9157	22.9999	27.8724	28.213	11.7953	19.7773	27.9725	34.4548	34.9121	26.7175	18.5487	13.8659	18.1248	20.8921	7.61654	36.2697	19.1777	23.634	13.897	17.4966	32.5692	25.2416	27.7264	16.8639	17.7534	19.8476	35.5103	44.3862	55.4289
1179	9.23511	15.5695	6.39945	16.5969	7.88226	7.60789	7.93015	13.4601	10.1284	10.3204	13.9133	22.9959	27.885	28.2166	11.793	19.797	27.9829	34.4643	34.9584	26.7362	18.57	13.8831	18.1642	20.9197	7.61545	36.2684	19.1852	23.6564	13.9064	17.5125	32.58	25.2403	27.7722	16.8591	17.7562	19.8526	35.5389	44.3943	55.4433
1180	9.23234	15.5696	6.39917	16.5958	7.87797	7.60319	7.92904	13.4525	10.1254	10.3141	13.9106	22.9917	27.8966	28.2195	11.7905	19.816	27.9935	34.4737	35.0048	26.7553	18.5913	13.9002	18.2033	20.9469	7.61478	36.2663	19.1927	23.6785	13.9158	17.5285	32.5914	25.2398	27.8179	16.8547	17.7586	19.8573	35.5671	44.4024	55.4572
1181	9.22957	15.5701	6.39898	16.5948	7.87425	7.59864	7.92857	13.4447	10.1219	10.3089	13.9068	22.9868	27.9058	28.2205	11.7877	19.8336	28.0045	34.484	35.0517	26.7756	18.6128	13.9171	18.2425	20.9732	7.61528	36.2626	19.1995	23.7011	13.9243	17.5446	32.6038	25.2402	27.8631	16.8505	17.7605	19.8617	35.5945	44.4114	55.4696
1182	9.22766	15.5699	6.39884	16.5938	7.87011	7.59385	7.92754	13.4369	10.1198	10.3029	13.9046	22.9832	27.9171	28.2239	11.7856	19.8525	28.0149	34.4913	35.0977	26.7946	18.6336	13.9333	18.2814	21.0003	7.61471	36.2597	19.208	23.7224	13.9337	17.5602	32.6151	25.2398	27.9085	16.8462	17.7624	19.8658	35.6227	44.42	55.4817
1183	9.22553	15.5691	6.39898	16.5925	7.86592	7.58893	7.92757	13.4289	10.1193	10.2966	13.9032	22.9807	27.929	28.2275	11.7829	19.871	28.0252	34.4966	35.1429	26.8123	18.6538	13.9488	18.3195	21.0276	7.6137	36.2562	19.2173	23.7424	13.9443	17.5757	32.6266	25.2402	27.9539	16.8421	17.763	19.8693	35.6497	44.428	55.4934
1184	9.22234	15.5687	6.39908	16.5916	7.86202	7.58445	7.92615	13.4213	10.1177	10.2901	13.9017	22.9774	27.9406	28.2317	11.7813	19.8903	28.0355	34.5035	35.1882	26.8316	18.6743	13.9652	18.3581	21.0543	7.61282	36.2535	19.2259	23.7632	13.9537	17.5908	32.6372	25.24	27.9993	16.8384	17.7658	19.8724	35.6757	44.4357	55.5045
1185	9.21915	15.5681	6.39906	16.5906	7.8582	7.57999	7.92342	13.4139	10.1165	10.2834	13.9008	22.9743	27.9524	28.2375	11.7807	19.9107	28.0459	34.5092	35.2326	26.8512	18.6945	13.9815	18.3971	21.081	7.61175	36.2507	19.2354	23.7833	13.9628	17.6058	32.6468	25.2387	28.0451	16.8347	17.7693	19.875	35.7023	44.4435	55.5149
1186	9.21691	15.568	6.39924	16.5903	7.85436	7.57568	7.92155	13.4063	10.1145	10.2773	13.8989	22.9709	27.9641	28.2417	11.7795	19.93	28.0554	34.5161	35.2779	26.8707	18.7149	13.998	18.436	21.1077	7.61098	36.2488	19.2437	23.8048	13.9713	17.62	32.657	25.2383	28.0899	16.8316	17.7728	19.8771	35.7286	44.451	55.5245
1187	9.21362	15.5684	6.39936	16.5907	7.85074	7.57195	7.91954	13.3988	10.1121	10.2709	13.8969	22.9675	27.976	28.2447	11.7785	19.9492	28.0647	34.5259	35.324	26.8915	18.7357	14.0157	18.4748	21.1341	7.61016	36.2487	19.251	23.8274	13.9791	17.6332	32.6665	25.2382	28.1344	16.8296	17.7779	19.8789	35.7552	44.4585	55.5345
1188	9.21074	15.5682	6.40008	16.5903	7.84707	7.56773	7.91793	13.3916	10.1095	10.2648	13.8948	22.9636	27.9871	28.2491	11.777	19.9678	28.0736	34.5315	35.3687	26.9102	18.7557	14.0319	18.5131	21.16	7.60964	36.2463	19.2587	23.8487	13.9877	17.6474	32.6768	25.2386	28.1784	16.8266	17.7811	19.8802	35.7824	44.4663	55.5443
1189	9.20872	15.5678	6.40131	16.59	7.84296	7.56292	7.91716	13.3841	10.1058	10.2595	13.8924	22.9588	27.9976	28.2536	11.775	19.9854	28.0816	34.5339	35.4138	26.9269	18.7751	14.0466	18.5515	21.1858	7.6094	36.2425	19.2659	23.8707	13.996	17.6621	32.6879	25.2394	28.2218	16.8234	17.783	19.8813	35.8087	44.4733	55.5534
1190	9.20585	15.5676	6.40217	16.5896	7.83956	7.55882	7.91535	13.3769	10.1033	10.2537	13.8897	22.9552	28.0087	28.2585	11.7735	20.0036	28.0898	34.5386	35.4575	26.9453	18.7947	14.0626	18.5897	21.2115	7.60918	36.2401	19.2737	23.8912	14.0043	17.6759	32.6983	25.2398	28.2648	16.8204	17.7859	19.882	35.8352	44.48	55.5627
1191	9.20351	15.5671	6.40304	16.5886	7.83649	7.5547	7.91287	13.3705	10.1011	10.2474	13.8867	22.9519	28.0197	28.2649	11.7719	20.0218	28.0977	34.5409	35.4998	26.9639	18.8138	14.079	18.6276	21.2365	7.60898	36.2371	19.2814	23.9096	14.0133	17.6899	32.7093	25.2405	28.3071	16.817	17.7883	19.8822	35.8606	44.4864	55.5708
1192	9.20053	15.567	6.40424	16.588	7.83366	7.55104	7.91097	13.3636	10.0991	10.2413	13.884	22.9486	28.0303	28.2702	11.7706	20.04	28.1058	34.5467	35.5418	26.9818	18.8331	14.095	18.6653	21.2618	7.60898	36.2344	19.2896	23.9295	14.0217	17.7036	32.7194	25.2413	28.3501	16.814	17.7913	19.8819	35.8845	44.4925	55.5778
1193	9.19787	15.5679	6.40552	16.5881	7.83171	7.54825	7.90879	13.3567	10.098	10.2347	13.8806	22.9467	28.041	28.2749	11.7697	20.0586	28.1135	34.5557	35.5826	27	18.8527	14.1116	18.703	21.2876	7.60932	36.2343	19.2985	23.9495	14.0294	17.7165	32.7288	25.2416	28.3931	16.8119	17.795	19.8815	35.9091	44.4982	55.5846
1194	9.19468	15.5678	6.40663	16.5876	7.82907	7.54501	7.90677	13.3496	10.0966	10.2288	13.8779	22.9438	28.0519	28.2797	11.7688	20.0768	28.1219	34.5643	35.624	27.0183	18.8721	14.1279	18.7403	21.313	7.60949	36.2315	19.307	23.9698	14.0374	17.7292	32.7384	25.2424	28.4359	16.809	17.7986	19.8807	35.9331	44.5031	55.5909
1195	9.19255	15.5675	6.40827	16.5863	7.82641	7.54186	7.90476	13.3423	10.0957	10.2235	13.8759	22.9395	28.0627	28.2845	11.7682	20.0951	28.1313	34.576	35.6642	27.0366	18.8916	14.1439	18.7772	21.3386	7.61004	36.2264	19.3156	23.9915	14.0457	17.7419	32.7475	25.244	28.4791	16.8057	17.8028	19.8798	35.9573	44.5086	55.5969
1196	9.18947	15.5668	6.4095	16.5855	7.8235	7.53856	7.90344	13.3351	10.094	10.2179	13.8738	22.9361	28.0731	28.2888	11.7672	20.1129	28.14	34.5844	35.706	27.0538	18.9107	14.1596	18.8138	21.3633	7.61008	36.2219	19.3241	24.0121	14.0536	17.7545	32.7569	25.2451	28.522	16.8024	17.8063	19.8788	35.9822	44.5143	55.603
1197	9.18723	15.565	6.41025	16.5849	7.82021	7.53512	7.90252	13.3281	10.0911	10.2125	13.8717	22.9324	28.0839	28.2927	11.766	20.1303	28.1488	34.591	35.7494	27.0699	18.9292	14.1755	18.8494	21.3874	7.60986	36.2165	19.3323	24.0322	14.0614	17.7667	32.7665	25.2465	28.5645	16.7989	17.8096	19.8779	36.0071	44.5197	55.6076
1198	9.18457	15.5637	6.41064	16.5841	7.81661	7.53127	7.90149	13.3206	10.0893	10.2073	13.8697	22.9297	28.0947	28.2973	11.7649	20.1476	28.1577	34.5972	35.7922	27.088	18.9483	14.1911	18.8862	21.4119	7.60929	36.2111	19.3407	24.0527	14.0689	17.7784	32.7764	25.2473	28.6072	16.7951	17.8128	19.877	36.0304	44.525	55.6121
1199	9.18096	15.562	6.41186	16.5831	7.81343	7.52799	7.90061	13.3132	10.0876	10.2017	13.868	22.9266	28.1049	28.3011	11.7638	20.1645	28.1654	34.6046	35.8348	27.1051	18.9669	14.2065	18.9223	21.4353	7.60886	36.2063	19.3493	24.0725	14.0763	17.79	32.7857	25.248	28.6487	16.7916	17.8157	19.8761	36.0542	44.5305	55.6166
1200	9.17862	15.56	6.41358	16.5825	7.81031	7.52491	7.90074	13.3055	10.0853	10.1957	13.8666	22.9244	28.1147	28.3042	11.7621	20.1809	28.1715	34.6103	35.879	27.121	18.9853	14.2213	18.9586	21.4577	7.60804	36.2021	19.3586	24.0916	14.0835	17.8017	32.7952	25.2485	28.6903	16.7882	17.8176	19.8751	36.0776	44.5349	55.6202
1201	9.17511	15.5581	6.41464	16.5812	7.80719	7.52159	7.89964	13.2982	10.0837	10.1902	13.8646	22.9209	28.1241	28.308	11.7612	20.1971	28.1796	34.6189	35.9199	27.1382	19.0036	14.2364	18.9938	21.4807	7.60769	36.1978	19.3669	24.1111	14.0904	17.813	32.8039	25.249	28.7309	16.7853	17.8207	19.8742	36.1002	44.5381	55.6236
1202	9.17149	15.556	6.41584	16.579	7.8042	7.51843	7.89753	13.2907	10.0831	10.185	13.8626	22.917	28.1332	28.3118	11.7609	20.2131	28.1883	34.6308	35.9585	27.1566	19.0222	14.2518	19.0287	21.5034	7.60734	36.1939	19.3752	24.1308	14.0971	17.8239	32.8117	25.2491	28.7703	16.7827	17.8242	19.8731	36.1235	44.5419	55.6256
1203	9.16809	15.554	6.41686	16.5775	7.80118	7.51518	7.89636	13.2835	10.0815	10.1796	13.8604	22.9129	28.1424	28.3157	11.7601	20.2289	28.1961	34.6402	35.9989	27.1738	19.0398	14.2666	19.0635	21.5264	7.60751	36.1889	19.3833	24.15	14.1039	17.8347	32.8203	25.2497	28.8098	16.7799	17.8276	19.8719	36.1471	44.546	55.6272
1204	9.16574	15.5523	6.41729	16.5762	7.79811	7.51185	7.89554	13.2772	10.0794	10.1743	13.8576	22.9078	28.1512	28.3197	11.7593	20.2445	28.2047	34.6493	36.0383	27.1909	19.0566	14.2811	19.0979	21.5502	7.60833	36.1836	19.3906	24.1694	14.1107	17.8462	32.8294	25.2504	28.8493	16.7775	17.8317	19.8707	36.1706	44.5488	55.6269
1205	9.16266	15.5496	6.41805	16.5746	7.79508	7.50828	7.89417	13.2699	10.0775	10.169	13.8551	22.9039	28.1599	28.3239	11.7585	20.2597	28.2124	34.6581	36.0791	27.2074	19.0738	14.2956	19.132	21.5727	7.6085	36.1782	19.3986	24.188	14.1173	17.8561	32.8377	25.2513	28.888	16.7745	17.835	19.8694	36.1949	44.5514	55.6258
1206	9.15989	15.5467	6.41897	16.5734	7.79198	7.50459	7.89333	13.2621	10.0751	10.1634	13.8528	22.9006	28.1689	28.3281	11.7573	20.2749	28.2189	34.6666	36.1228	27.2237	19.0906	14.3099	19.1667	21.5947	7.60886	36.172	19.4072	24.2057	14.1242	17.8653	32.8462	25.2528	28.9258	16.771	17.8375	19.8683	36.2177	44.5528	55.6222
1207	9.15543	15.5434	6.42003	16.5716	7.78913	7.50104	7.89149	13.2548	10.0735	10.1581	13.8504	22.8968	28.1774	28.3327	11.7564	20.2892	28.2258	34.6746	36.1632	27.2396	19.1077	14.3243	19.2005	21.6165	7.60889	36.1659	19.4153	24.2237	14.1306	17.874	32.8542	25.2536	28.9644	16.7676	17.8408	19.867	36.2401	44.5531	55.617
1208	9.15277	15.5397	6.42118	16.5695	7.78626	7.49708	7.88735	13.247	10.0725	10.153	13.8476	22.8931	28.1854	28.3381	11.7559	20.3029	28.2332	34.6824	36.2026	27.2547	19.1255	14.339	19.2334	21.6373	7.6081	36.16	19.4232	24.2414	14.1362	17.8818	32.8615	25.2544	29.0028	16.764	17.8445	19.8659	36.262	44.5522	55.6098
1209	9.14851	15.5355	6.42224	16.5671	7.78364	7.4936	7.886	13.2398	10.071	10.1477	13.8452	22.8894	28.1938	28.3427	11.7551	20.3159	28.2399	34.69	36.2417	27.2702	19.1426	14.3533	19.2665	21.6585	7.60804	36.1539	19.4312	24.2592	14.1426	17.889	32.869	25.2551	29.0415	16.7608	17.8481	19.865	36.2828	44.5507	55.6015
1210	9.14553	15.5314	6.4235	16.5647	7.78137	7.49066	7.88654	13.2331	10.0702	10.1423	13.8432	22.8854	28.2025	28.3468	11.754	20.3286	28.2458	34.6975	36.2791	27.2858	19.1599	14.3673	19.2997	21.6798	7.60838	36.1478	19.4385	24.2776	14.1493	17.8961	32.8768	25.2553	29.0815	16.758	17.8523	19.864	36.3035	44.5476	55.5893
1211	9.14245	15.5261	6.42464	16.5616	7.77898	7.48748	7.88557	13.2263	10.0687	10.137	13.841	22.8816	28.2109	28.3512	11.7533	20.3403	28.2521	34.7042	36.3172	27.3011	19.1766	14.3815	19.3322	21.7007	7.60856	36.141	19.4467	24.295	14.1559	17.902	32.8841	25.256	29.1202	16.7547	17.8561	19.8629	36.3238	44.5433	55.5765
1212	9.13957	15.5206	6.42546	16.5582	7.77689	7.48437	7.88545	13.2196	10.0662	10.1316	13.8384	22.8782	28.2195	28.3554	11.7526	20.352	28.2584	34.7109	36.3561	27.3165	19.1928	14.3958	19.3643	21.7219	7.60916	36.1337	19.4558	24.3121	14.1629	17.9073	32.891	25.2573	29.1586	16.7512	17.8594	19.862	36.344	44.5373	55.5572
1213	9.13543	15.5136	6.42654	16.5545	7.77442	7.48114	7.88485	13.2131	10.0643	10.1264	13.8364	22.8748	28.2275	28.3596	11.7519	20.3618	28.2648	34.7169	36.3942	27.3318	19.2091	14.4099	19.3964	21.7422	7.60931	36.1261	19.4644	24.3286	14.17	17.9111	32.8979	25.2583	29.1966	16.7479	17.863	19.861	36.3645	44.5306	55.5339
1214	9.13266	15.5057	6.42773	16.5504	7.77156	7.47773	7.88298	13.2067	10.0625	10.1212	13.8345	22.871	28.2349	28.3638	11.7515	20.3709	28.2716	34.722	36.432	27.3469	19.2247	14.4237	19.428	21.7619	7.60898	36.1174	19.4735	24.3439	14.177	17.9137	32.9044	25.2593	29.2336	16.7444	17.8666	19.8604	36.3838	44.5215	55.5054
1215	9.12851	15.4968	6.42909	16.5457	7.7689	7.47426	7.88082	13.2004	10.0608	10.1162	13.8325	22.8677	28.2425	28.3689	11.751	20.3781	28.2778	34.7271	36.4699	27.362	19.2409	14.4382	19.46	21.7816	7.60889	36.1089	19.482	24.3597	14.1843	17.9156	32.911	25.2605	29.2709	16.7407	17.8704	19.8599	36.4026	44.5106	55.4724
1216	9.12479	15.4863	6.43036	16.5413	7.76643	7.47127	7.87915	13.194	10.0597	10.1119	13.831	22.8645	28.2495	28.3725	11.7503	20.383	28.2838	34.7321	36.5076	27.3763	19.2572	14.4522	19.4921	21.801	7.60863	36.1014	19.4901	24.3759	14.1908	17.9154	32.918	25.2618	29.3081	16.7377	17.8742	19.8597	36.4213	44.4978	55.433
1217	9.12011	15.4736	6.43203	16.5361	7.76396	7.46838	7.87873	13.1877	10.0582	10.1072	13.8294	22.8613	28.2567	28.3754	11.7495	20.3861	28.29	34.7373	36.545	27.3911	19.2734	14.4657	19.5231	21.8203	7.60866	36.095	19.4983	24.3921	14.1976	17.9136	32.9247	25.2635	29.3453	16.7341	17.8778	19.8598	36.4382	44.4836	55.3909
1218	9.11638	15.4589	6.43383	16.5301	7.76184	7.46562	7.87832	13.1814	10.0569	10.1027	13.8275	22.8583	28.264	28.3794	11.7491	20.3877	28.2963	34.7424	36.5818	27.4056	19.2893	14.4793	19.5537	21.8398	7.60909	36.0875	19.5067	24.4082	14.204	17.9099	32.9305	25.265	29.3819	16.7309	17.8815	19.8596	36.4545	44.4676	55.342
1219	9.11213	15.4424	6.43575	16.5236	7.76017	7.46335	7.87803	13.1746	10.0556	10.0984	13.825	22.8554	28.2712	28.3834	11.7487	20.3872	28.3025	34.7479	36.618	27.4195	19.3051	14.4929	19.5837	21.8598	7.60992	36.0805	19.5152	24.425	14.2098	17.9047	32.9356	25.2667	29.4186	16.728	17.8852	19.8593	36.4708	44.4508	55.2899
1220	9.1083	15.4239	6.43792	16.5164	7.75843	7.46064	7.87763	13.1689	10.0545	10.0942	13.8232	22.8525	28.2792	28.3877	11.7488	20.3855	28.3088	34.7521	36.6546	27.4342	19.3207	14.5065	19.614	21.8789	7.61074	36.0723	19.524	24.4405	14.216	17.8976	32.941	25.2682	29.4547	16.7245	17.8889	19.8588	36.4863	44.4323	55.2316
1221	9.10404	15.403	6.44044	16.5082	7.75678	7.45774	7.87772	13.1635	10.0536	10.0896	13.8215	22.8496	28.2883	28.3928	11.7493	20.3822	28.3156	34.7564	36.6911	27.4495	19.3358	14.52	19.6442	21.8977	7.61181	36.062	19.5333	24.4551	14.2221	17.8886	32.9456	25.2694	29.4901	16.7205	17.8928	19.8584	36.5022	44.414	55.1743
1222	9.09957	15.3814	6.44282	16.4996	7.75521	7.45498	7.8779	13.1582	10.0527	10.0857	13.8197	22.8471	28.296	28.3976	11.7497	20.3781	28.3213	34.7593	36.7276	27.4643	19.3511	14.5336	19.674	21.9162	7.61292	36.0543	19.5421	24.4703	14.2286	17.8787	32.9506	25.2707	29.5262	16.7173	17.8964	19.8578	36.5182	44.3936	55.1107
1223	9.09479	15.3574	6.44533	16.4903	7.75364	7.4519	7.87784	13.1536	10.0518	10.0825	13.8176	22.8447	28.3034	28.4019	11.7502	20.3717	28.3263	34.76	36.7651	27.4791	19.3665	14.5474	19.704	21.934	7.61411	36.048	19.5508	24.4859	14.2355	17.8664	32.9565	25.2723	29.5625	16.7136	17.8998	19.8571	36.5341	44.3758	55.0538
1224	9.09074	15.3343	6.44788	16.4807	7.75246	7.44935	7.878	13.1485	10.0512	10.0786	13.8163	22.8421	28.3112	28.4067	11.7509	20.3665	28.3314	34.7624	36.8013	27.4941	19.3819	14.5612	19.7334	21.9522	7.6155	36.0408	19.5594	24.5005	14.2421	17.8553	32.9612	25.2735	29.5987	16.7106	17.9036	19.8568	36.55	44.3573	54.9951
1225	9.08596	15.3091	6.45022	16.4699	7.75151	7.44705	7.87865	13.1428	10.0508	10.0745	13.8148	22.8397	28.3185	28.4119	11.7518	20.3594	28.3356	34.7643	36.837	27.5097	19.3976	14.5748	19.7622	21.9704	7.61718	36.0344	19.5674	24.515	14.2495	17.842	32.9651	25.274	29.6357	16.7088	17.9074	19.8557	36.5659	44.3421	54.9449
1226	9.0817	15.2867	6.45295	16.46	7.75053	7.44486	7.87924	13.1377	10.0505	10.0707	13.8138	22.8372	28.3263	28.4169	11.7527	20.3553	28.3407	34.767	36.8724	27.5242	19.4129	14.5886	19.7911	21.9887	7.61875	36.0275	19.5762	24.5293	14.2558	17.8319	32.9695	25.2755	29.6711	16.7062	17.9113	19.8542	36.5812	44.3284	54.8978
1227	9.07777	15.2634	6.45599	16.4497	7.74988	7.44314	7.87953	13.1329	10.0508	10.0667	13.814	22.8345	28.3351	28.4219	11.7539	20.3505	28.3467	34.7708	36.9066	27.5381	19.4282	14.6029	19.8201	22.0072	7.62058	36.0195	19.5854	24.5428	14.2609	17.8213	32.9741	25.2774	29.7054	16.703	17.9158	19.8525	36.5976	44.3168	54.8579
1228	9.07468	15.2443	6.45892	16.4403	7.74912	7.44129	7.88014	13.128	10.0506	10.0628	13.8133	22.8323	28.3432	28.4269	11.7549	20.3499	28.3522	34.7741	36.9415	27.552	19.443	14.6164	19.8488	22.0252	7.62209	36.0122	19.5944	24.5567	14.2667	17.8147	32.9779	25.2791	29.74	16.7003	17.9199	19.8504	36.6136	44.3065	54.823
1229	9.07191	15.2261	6.46205	16.4309	7.74827	7.43929	7.8814	13.1232	10.0498	10.0593	13.8123	22.8308	28.3511	28.4318	11.7557	20.3507	28.3582	34.7766	36.9769	27.5654	19.4576	14.6296	19.8775	22.043	7.62318	36.0051	19.604	24.5713	14.272	17.8093	32.9819	25.2817	29.7745	16.6976	17.9238	19.8481	36.6317	44.2999	54.7964
1230	9.06979	15.2128	6.46524	16.423	7.74741	7.4375	7.8823	13.1185	10.0495	10.0556	13.8115	22.8289	28.3585	28.4367	11.7568	20.356	28.3636	34.7806	37.0114	27.5787	19.4718	14.6427	19.9056	22.0606	7.62464	35.9984	19.6127	24.5852	14.2776	17.8087	32.985	25.2836	29.8083	16.6951	17.9276	19.8456	36.6516	44.2956	54.7754
1231	9.06745	15.2027	6.46851	16.4157	7.74658	7.43603	7.88284	13.1139	10.0492	10.0517	13.8109	22.8272	28.3656	28.4412	11.7579	20.3644	28.3687	34.785	37.0455	27.5916	19.4855	14.6549	19.9338	22.0776	7.62615	35.9921	19.6206	24.5987	14.2835	17.8112	32.9869	25.285	29.8416	16.6928	17.9314	19.8427	36.6716	44.2944	54.7632
1232	9.06543	15.1964	6.47157	16.4095	7.74579	7.43416	7.88379	13.109	10.0489	10.0476	13.8095	22.8253	28.3725	28.4459	11.7591	20.3767	28.3735	34.7905	37.0801	27.6053	19.4992	14.6677	19.9614	22.0951	7.62751	35.9857	19.6293	24.6124	14.29	17.8174	32.9887	25.2866	29.8759	16.6908	17.9349	19.8394	36.6932	44.2971	54.7608
1233	9.06383	15.1953	6.47491	16.4051	7.74481	7.4325	7.88485	13.1046	10.049	10.0437	13.8087	22.8227	28.3793	28.4509	11.7604	20.3929	28.3784	34.7967	37.1139	27.619	19.5129	14.6811	19.9875	22.1117	7.62949	35.9793	19.6372	24.6258	14.2959	17.8282	32.99	25.2881	29.9093	16.6889	17.9385	19.8358	36.7148	44.3014	54.7632
1234	9.06245	15.1988	6.47833	16.4018	7.74378	7.43123	7.886	13.0999	10.0492	10.0401	13.808	22.8203	28.3859	28.4558	11.7618	20.4134	28.3842	34.8035	37.1481	27.6318	19.5261	14.6949	20.014	22.1282	7.6321	35.9735	19.645	24.6397	14.3021	17.8434	32.9913	25.2892	29.9418	16.6865	17.9427	19.8319	36.736	44.3082	54.7733
1235	9.06287	15.2073	6.48148	16.3998	7.74265	7.42952	7.8866	13.0951	10.0493	10.0367	13.8069	22.8184	28.3922	28.4608	11.7631	20.4387	28.3907	34.8113	37.1817	27.6443	19.539	14.7087	20.0404	22.1451	7.63419	35.9676	19.6532	24.6536	14.308	17.8635	32.993	25.2909	29.9753	16.684	17.9473	19.8278	36.7582	44.3169	54.7883
1236	9.06351	15.2202	6.48461	16.3994	7.74119	7.42803	7.88695	13.0906	10.0488	10.0335	13.8062	22.8166	28.3994	28.4659	11.7643	20.4671	28.3979	34.8182	37.2153	27.6569	19.5515	14.7221	20.0661	22.1608	7.63594	35.9617	19.6608	24.6669	14.3135	17.887	32.9947	25.2927	30.0079	16.682	17.9517	19.8234	36.7811	44.3276	54.8087
1237	9.06394	15.2363	6.48771	16.4003	7.73978	7.42621	7.8873	13.0858	10.0485	10.0301	13.8056	22.8149	28.4062	28.4708	11.7657	20.4984	28.4045	34.8262	37.2488	27.6692	19.5635	14.735	20.0918	22.1763	7.63781	35.9569	19.6684	24.6799	14.3192	17.9129	32.9968	25.2943	30.04	16.6798	17.9559	19.8188	36.8045	44.3405	54.8351
1238	9.06564	15.2577	6.49068	16.403	7.73815	7.42415	7.88706	13.0811	10.0482	10.027	13.8053	22.8138	28.4127	28.4754	11.767	20.5347	28.4112	34.8353	37.2819	27.6804	19.5747	14.7471	20.1178	22.1917	7.63949	35.9528	19.6761	24.6922	14.3251	17.9433	32.9993	25.2962	30.0714	16.6776	17.9601	19.8139	36.8288	44.3549	54.8651
1239	9.06681	15.2793	6.49366	16.4057	7.73679	7.42216	7.88728	13.076	10.048	10.0234	13.8044	22.8123	28.4192	28.4805	11.7684	20.57	28.4179	34.8437	37.3146	27.6929	19.5859	14.7596	20.1431	22.2065	7.64111	35.9495	19.6834	24.7051	14.3303	17.9736	33.0017	25.2975	30.1028	16.6752	17.9642	19.8087	36.8544	44.3716	54.9023
1240	9.06809	15.305	6.49689	16.4098	7.73562	7.42011	7.88798	13.0708	10.048	10.0196	13.8037	22.8106	28.4261	28.4861	11.7702	20.6084	28.4244	34.8517	37.3476	27.7063	19.5966	14.7719	20.1678	22.2203	7.64262	35.9475	19.6901	24.7181	14.3351	18.0072	33.0042	25.2985	30.1337	16.6729	17.9682	19.8033	36.8794	44.3889	54.9386
1241	9.06947	15.3291	6.49965	16.4138	7.73402	7.41803	7.88806	13.0654	10.0475	10.0154	13.8024	22.809	28.4322	28.4911	11.7713	20.645	28.431	34.8611	37.3801	27.7188	19.6075	14.7844	20.1926	22.2349	7.64456	35.9443	19.6975	24.7308	14.3402	18.039	33.0068	25.2995	30.1644	16.6703	17.9726	19.7977	36.9052	44.4087	54.9793
1242	9.07106	15.3555	6.50223	16.4185	7.73242	7.41611	7.88798	13.0597	10.0468	10.0108	13.8004	22.8079	28.4375	28.4961	11.772	20.6831	28.438	34.8707	37.4116	27.7311	19.6181	14.7968	20.2176	22.2497	7.64687	35.9412	19.705	24.7438	14.3451	18.073	33.0091	25.3004	30.1952	16.6674	17.9773	19.7919	36.9299	44.4274	55.0184
1243	9.0717	15.3789	6.5046	16.4232	7.73061	7.41385	7.88772	13.0541	10.0459	10.0064	13.7988	22.8056	28.4435	28.5011	11.7728	20.7181	28.4448	34.8807	37.4437	27.7435	19.6289	14.8092	20.242	22.2645	7.64828	35.9381	19.7122	24.7562	14.35	18.1034	33.0121	25.3013	30.2253	16.6647	17.9816	19.7861	36.9539	44.4474	55.0593
1244	9.07287	15.4027	6.5067	16.4288	7.72838	7.41135	7.88714	13.0485	10.0443	10.0014	13.797	22.8029	28.45	28.506	11.7731	20.753	28.4514	34.8925	37.4765	27.7562	19.6396	14.8214	20.2662	22.2796	7.64963	35.9347	19.7197	24.7679	14.3556	18.1336	33.0155	25.3022	30.2547	16.6623	17.9863	19.7797	36.9785	44.466	55.0984
1245	9.07319	15.4226	6.50853	16.4335	7.72639	7.40881	7.88656	13.0427	10.0431	9.99703	13.7955	22.7999	28.4553	28.5105	11.7738	20.7843	28.458	34.9028	37.508	27.7685	19.6507	14.8336	20.2901	22.2941	7.65096	35.9312	19.7267	24.7796	14.3604	18.16	33.0192	25.3028	30.2844	16.6594	17.9902	19.7729	37.003	44.4851	55.139
1246	9.07309	15.4409	6.51008	16.438	7.72481	7.40619	7.88555	13.0368	10.0423	9.99322	13.7944	22.7957	28.4601	28.5151	11.7748	20.8137	28.4648	34.912	37.5386	27.7805	19.6616	14.8459	20.3132	22.3079	7.65122	35.9284	19.7334	24.7912	14.3644	18.1843	33.023	25.3034	30.3145	16.6563	17.9932	19.766	37.0277	44.5019	55.1754
1247	9.07223	15.4555	6.51171	16.4419	7.72243	7.40337	7.88506	13.0306	10.0409	9.98883	13.7928	22.7922	28.4654	28.5191	11.7755	20.8397	28.4712	34.922	37.5691	27.7929	19.6731	14.858	20.3368	22.3224	7.65236	35.9247	19.7398	24.8027	14.3686	18.2052	33.0274	25.3036	30.3437	16.6531	17.9968	19.7588	37.0533	44.518	55.2118
1248	9.0716	15.4668	6.51317	16.445	7.71949	7.40053	7.88557	13.0243	10.0395	9.98468	13.7917	22.7888	28.4701	28.5223	11.7764	20.8628	28.4769	34.9322	37.5985	27.8045	19.6852	14.8699	20.3611	22.3369	7.65448	35.9198	19.7455	24.8142	14.373	18.223	33.032	25.3035	30.3728	16.6498	18.0005	19.7515	37.0777	44.5323	55.2423
1249	9.07011	15.4757	6.51447	16.4481	7.7167	7.39734	7.88472	13.0176	10.0379	9.97992	13.7895	22.7853	28.4747	28.5257	11.7769	20.8833	28.4828	34.942	37.6285	27.8169	19.6973	14.8818	20.3842	22.3515	7.65591	35.9151	19.7516	24.825	14.377	18.2381	33.0372	25.3033	30.4016	16.6463	18.0037	19.7444	37.1021	44.5446	55.2688
1250	9.0684	15.4815	6.51595	16.4508	7.71359	7.39382	7.88341	13.0104	10.0364	9.97446	13.7865	22.7818	28.4796	28.5291	11.7773	20.9004	28.4885	34.9522	37.6591	27.83	19.7095	14.8935	20.4073	22.3667	7.65716	35.9103	19.7575	24.8353	14.3808	18.2497	33.0428	25.3028	30.43	16.6429	18.0071	19.7367	37.1252	44.5558	55.2918
1251	9.06713	15.4848	6.5169	16.4534	7.71039	7.39012	7.88191	13.0035	10.0339	9.96883	13.7836	22.7786	28.4848	28.5319	11.7774	20.9152	28.4943	34.9624	37.6886	27.8432	19.7223	14.9053	20.4299	22.3816	7.65839	35.9054	19.7633	24.8458	14.3846	18.2592	33.0493	25.302	30.4579	16.6389	18.0098	19.7288	37.1468	44.5656	55.3097
1252	9.06436	15.4863	6.51738	16.4559	7.70745	7.38619	7.88026	12.9962	10.0317	9.96379	13.7801	22.7747	28.4889	28.5346	11.7778	20.928	28.5002	34.971	37.7181	27.8559	19.7358	14.9169	20.4512	22.3965	7.65937	35.9007	19.7695	24.8553	14.388	18.2671	33.056	25.3016	30.4856	16.6348	18.0117	19.7206	37.1683	44.5745	55.3258
1253	9.0617	15.4864	6.51795	16.4582	7.70424	7.38255	7.87763	12.9889	10.0295	9.95863	13.777	22.7709	28.4922	28.5377	11.7781	20.939	28.5064	34.978	37.7472	27.8693	19.7489	14.9282	20.4727	22.411	7.66009	35.8959	19.7755	24.8646	14.3916	18.2731	33.0632	25.3011	30.5129	16.6307	18.0133	19.7118	37.1885	44.5811	55.3372
1254	9.05926	15.4853	6.51879	16.4604	7.70071	7.37897	7.87607	12.9821	10.0265	9.95307	13.7745	22.767	28.4962	28.5406	11.7783	20.9489	28.5124	34.985	37.7747	27.8816	19.7622	14.9396	20.4948	22.4254	7.6612	35.8904	19.781	24.8741	14.3954	18.2781	33.0722	25.3003	30.539	16.6264	18.0146	19.7031	37.209	44.5883	55.3489
1255	9.05585	15.4838	6.51963	16.463	7.69696	7.37524	7.87468	12.9746	10.0239	9.94744	13.7717	22.7625	28.4998	28.5433	11.7781	20.958	28.5184	34.9921	37.8022	27.8936	19.776	14.9507	20.5167	22.4399	7.66225	35.8856	19.7862	24.8826	14.3991	18.2826	33.0827	25.2996	30.5652	16.6223	18.0161	19.6944	37.2297	44.5946	55.3576
1256	9.05351	15.4823	6.52064	16.466	7.69284	7.37149	7.87276	12.9671	10.0211	9.94151	13.769	22.7579	28.5028	28.5464	11.7774	20.9671	28.5239	35.0001	37.8296	27.9059	19.7893	14.9618	20.5386	22.4536	7.66324	35.8803	19.7915	24.8906	14.4029	18.2866	33.095	25.2988	30.5918	16.618	18.0174	19.6856	37.2498	44.6008	55.3663
1257	9.05074	15.4814	6.52158	16.4697	7.68902	7.36697	7.87098	12.9597	10.0178	9.93562	13.7663	22.7535	28.5065	28.5494	11.7768	20.9761	28.5295	35.0089	37.856	27.9172	19.8027	14.9733	20.5606	22.4676	7.6644	35.8749	19.7969	24.899	14.4067	18.2906	33.1081	25.2979	30.6181	16.6136	18.019	19.6768	37.2705	44.6084	55.3773
1258	9.04755	15.4817	6.522	16.4746	7.68501	7.36247	7.86921	12.9519	10.0149	9.92991	13.7633	22.7491	28.5097	28.552	11.7764	20.9857	28.5354	35.0173	37.8833	27.9292	19.8162	14.9843	20.5816	22.4817	7.66524	35.8704	19.802	24.9072	14.4101	18.2957	33.1218	25.2969	30.6444	16.6091	18.0207	19.668	37.2914	44.6164	55.3879
1259	9.04468	15.4823	6.52178	16.4804	7.68069	7.35747	7.86776	12.9438	10.0121	9.92481	13.7601	22.7449	28.5123	28.5545	11.7759	20.9951	28.5415	35.026	37.9118	27.9411	19.8302	14.9948	20.6016	22.4962	7.66594	35.8665	19.807	24.9149	14.413	18.3013	33.1368	25.296	30.671	16.6045	18.0227	19.6592	37.3117	44.6251	55.4026
1260	9.04202	15.4847	6.52206	16.4869	7.67673	7.35295	7.86591	12.9359	10.0091	9.9189	13.7569	22.7403	28.5151	28.557	11.7756	21.006	28.5472	35.0349	37.9387	27.9535	19.8435	15.0058	20.6222	22.5102	7.66655	35.8625	19.8123	24.9227	14.4166	18.3079	33.1514	25.2947	30.6969	16.6	18.0241	19.6502	37.3316	44.6348	55.4187
1261	9.03915	15.4883	6.522	16.4947	7.67299	7.34854	7.86373	12.9279	10.0063	9.91232	13.7534	22.7359	28.518	28.559	11.7753	21.0173	28.5528	35.0438	37.965	27.9666	19.8563	15.0167	20.6426	22.5241	7.66669	35.8594	19.8174	24.9305	14.4201	18.3153	33.1667	25.2927	30.7222	16.5956	18.0252	19.6414	37.3524	44.6449	55.4395
1262	9.03713	15.4928	6.52252	16.5026	7.66906	7.34401	7.86156	12.92	10.0033	9.90647	13.7503	22.7311	28.5206	28.5613	11.775	21.0298	28.5587	35.0527	37.9915	27.9791	19.8697	15.0278	20.6629	22.538	7.66739	35.8554	19.8226	24.9383	14.4237	18.3234	33.1816	25.2914	30.7476	16.5911	18.0267	19.6327	37.3729	44.6556	55.4638
1263	9.03543	15.4985	6.52381	16.5114	7.6654	7.33958	7.85913	12.9121	9.99978	9.90089	13.7473	22.7254	28.5231	28.564	11.7749	21.0437	28.5646	35.0618	38.017	27.9915	19.8834	15.0393	20.6834	22.5516	7.66837	35.8508	19.8282	24.9462	14.4278	18.3322	33.1966	25.2904	30.7724	16.5864	18.0278	19.6242	37.3941	44.6669	55.4905
1264	9.03319	15.5051	6.52446	16.5201	7.66147	7.33493	7.85701	12.9044	9.99676	9.89503	13.7444	22.7207	28.5256	28.5663	11.7746	21.0577	28.5707	35.0712	38.0425	28.0038	19.8969	15.0506	20.7037	22.5654	7.66933	35.8468	19.8333	24.9538	14.4315	18.3418	33.2108	25.2893	30.7976	16.5821	18.0293	19.616	37.4167	44.6792	55.5223
1265	9.03096	15.5126	6.52497	16.5293	7.65705	7.33004	7.85507	12.897	9.994	9.8892	13.7418	22.7163	28.5276	28.5682	11.7745	21.0725	28.5778	35.0806	38.0682	28.0153	19.911	15.0622	20.7237	22.5796	7.67073	35.8421	19.8377	24.9614	14.4348	18.3524	33.2245	25.2884	30.8231	16.578	18.0316	19.6077	37.4382	44.6914	55.5531
1266	9.02904	15.5208	6.52558	16.5384	7.65306	7.32535	7.85313	12.8892	9.99112	9.88351	13.7391	22.712	28.5305	28.5706	11.7744	21.0878	28.5841	35.0901	38.0935	28.0277	19.9246	15.0734	20.7434	22.5934	7.6718	35.8389	19.8428	24.9687	14.4381	18.3634	33.2381	25.2877	30.8484	16.5737	18.0331	19.5993	37.4595	44.7045	55.5867
1267	9.02777	15.5302	6.52568	16.5477	7.64934	7.32058	7.85115	12.881	9.98846	9.87739	13.7363	22.7086	28.5342	28.5731	11.774	21.1037	28.5897	35.1001	38.1183	28.0414	19.9378	15.0845	20.7628	22.6068	7.6723	35.837	19.8483	24.9755	14.4412	18.3753	33.2508	25.2866	30.8743	16.5696	18.034	19.5912	37.4808	44.7168	55.6181
1268	9.02681	15.5399	6.5264	16.5568	7.6454	7.31609	7.84939	12.8731	9.98583	9.87175	13.7337	22.7048	28.5374	28.5753	11.774	21.12	28.596	35.1099	38.1428	28.0542	19.9508	15.0954	20.782	22.6201	7.67333	35.835	19.8534	24.9829	14.4445	18.3877	33.2642	25.2859	30.8994	16.5653	18.035	19.5833	37.5016	44.7291	55.6502
1269	9.02553	15.5502	6.52754	16.5661	7.6414	7.31187	7.84765	12.8653	9.98347	9.86648	13.7314	22.7008	28.541	28.5775	11.7742	21.137	28.6023	35.1191	38.167	28.0671	19.9635	15.1061	20.8009	22.633	7.67455	35.8334	19.8587	24.9907	14.4479	18.4008	33.2782	25.2856	30.9239	16.5606	18.0357	19.5753	37.5227	44.7412	55.6803
1270	9.02468	15.5607	6.52881	16.5748	7.63776	7.30748	7.8461	12.8574	9.98031	9.86186	13.7288	22.6971	28.5438	28.5796	11.7743	21.1542	28.6086	35.1287	38.1911	28.0795	19.9762	15.1166	20.8195	22.646	7.67577	35.8318	19.8643	24.9981	14.4513	18.4141	33.2917	25.2853	30.9487	16.5561	18.0365	19.5674	37.5439	44.753	55.7097
1271	9.02436	15.5714	6.53032	16.5831	7.63397	7.30319	7.84514	12.8496	9.97742	9.85643	13.7261	22.6936	28.5466	28.5818	11.7748	21.1716	28.615	35.1388	38.2144	28.0912	19.9887	15.1272	20.8383	22.6593	7.6771	35.8318	19.869	25.0065	14.455	18.4279	33.3048	25.2841	30.9725	16.5518	18.0373	19.5596	37.5651	44.7646	55.7371
1272	9.02362	15.5821	6.53127	16.591	7.63003	7.29911	7.84398	12.8421	9.97507	9.85097	13.7239	22.6894	28.5487	28.5844	11.7754	21.189	28.6215	35.1496	38.238	28.1019	20.0011	15.1377	20.856	22.6726	7.67884	35.8303	19.8732	25.014	14.459	18.4418	33.3176	25.2835	30.9954	16.5478	18.038	19.5516	37.5865	44.7765	55.7634
1273	9.0233	15.5931	6.5317	16.5986	7.62671	7.29486	7.84221	12.8345	9.97228	9.84572	13.7215	22.6853	28.5516	28.5871	11.7761	21.2065	28.6282	35.1611	38.2616	28.1129	20.0137	15.1485	20.8736	22.6859	7.68047	35.8284	19.8774	25.0207	14.4635	18.4555	33.3304	25.2826	31.0189	16.5437	18.0384	19.544	37.6078	44.7877	55.7875
1274	9.02351	15.6044	6.53267	16.6059	7.6237	7.29056	7.84087	12.827	9.9699	9.83994	13.7192	22.6814	28.5551	28.5899	11.7769	21.2245	28.6348	35.1726	38.2848	28.1245	20.0257	15.1597	20.8912	22.699	7.68188	35.8278	19.8821	25.0278	14.4678	18.47	33.3436	25.2815	31.0418	16.5393	18.0378	19.5369	37.6294	44.7987	55.8098
1275	9.02372	15.616	6.53421	16.613	7.62064	7.28671	7.83994	12.8202	9.96804	9.83452	13.7177	22.6782	28.5574	28.5925	11.7779	21.2426	28.6416	35.1844	38.3078	28.1362	20.0376	15.1707	20.9087	22.7115	7.68382	35.8255	19.8875	25.0343	14.4718	18.4845	33.3577	25.2814	31.065	16.535	18.0369	19.5296	37.6505	44.8088	55.8298
1276	9.02457	15.6279	6.53573	16.6202	7.61763	7.28271	7.83859	12.8134	9.96545	9.82933	13.7161	22.6751	28.5601	28.594	11.7792	21.2611	28.6485	35.1964	38.33	28.1479	20.0493	15.1814	20.9267	22.7239	7.68608	35.8229	19.8929	25.0406	14.476	18.499	33.3718	25.2812	31.0881	16.531	18.0361	19.5227	37.6716	44.818	55.8472
1277	9.02532	15.6398	6.53763	16.6276	7.6149	7.27848	7.83785	12.8069	9.96309	9.8243	13.7137	22.672	28.5633	28.5961	11.7804	21.2797	28.6547	35.2085	38.3519	28.1595	20.0605	15.1919	20.9443	22.7361	7.68831	35.8213	19.8988	25.0473	14.4806	18.5143	33.3846	25.2812	31.1101	16.5278	18.0351	19.5155	37.692	44.8269	55.8634
1278	9.02681	15.6516	6.53951	16.6348	7.61212	7.27497	7.83718	12.8006	9.96086	9.81933	13.7113	22.6691	28.565	28.5985	11.7819	21.2983	28.6606	35.2204	38.3734	28.171	20.0715	15.2021	20.9614	22.7479	7.69061	35.8192	19.9042	25.0536	14.4852	18.5297	33.3968	25.2818	31.132	16.5242	18.0346	19.5084	37.7124	44.8347	55.8782
1279	9.02787	15.6634	6.54108	16.6417	7.60934	7.27136	7.83623	12.7939	9.95825	9.81434	13.7093	22.6655	28.5674	28.6011	11.7834	21.3171	28.6671	35.2332	38.3957	28.1823	20.0824	15.2126	20.9786	22.7598	7.69281	35.8179	19.9097	25.0599	14.4902	18.545	33.4087	25.2821	31.1539	16.5207	18.0349	19.5012	37.7323	44.8415	55.8907
1280	9.02936	15.6751	6.54215	16.6486	7.60675	7.2677	7.83516	12.7872	9.95495	9.80946	13.707	22.6611	28.5707	28.604	11.7848	21.3362	28.6737	35.2468	38.4183	28.1932	20.0935	15.2233	20.9959	22.7714	7.69489	35.8175	19.915	25.0661	14.4964	18.5607	33.4198	25.2822	31.1754	16.5173	18.0355	19.4944	37.7527	44.8481	55.9031
1281	9.03085	15.6866	6.54378	16.6554	7.60411	7.26427	7.83388	12.7807	9.95263	9.80472	13.705	22.6572	28.573	28.6068	11.7865	21.3546	28.6807	35.2604	38.4405	28.2042	20.104	15.2338	21.0124	22.7833	7.69716	35.8163	19.9206	25.0723	14.5009	18.576	33.4309	25.2826	31.1972	16.5144	18.037	19.4877	37.7733	44.8538	55.9141
1282	9.03181	15.6981	6.54573	16.662	7.6013	7.26127	7.83231	12.7742	9.95078	9.80014	13.704	22.6532	28.5741	28.6098	11.7885	21.3731	28.6887	35.2741	38.4633	28.2148	20.1142	15.2444	21.0286	22.7955	7.69955	35.8157	19.9266	25.0786	14.5047	18.5913	33.4421	25.2832	31.2193	16.5115	18.039	19.481	37.7937	44.8596	55.9252
1283	9.03383	15.7093	6.54725	16.6685	7.5987	7.2578	7.83106	12.7678	9.94862	9.79524	13.7021	22.6493	28.5767	28.6127	11.7903	21.3913	28.6958	35.2886	38.4853	28.2257	20.1244	15.2547	21.0448	22.807	7.70176	35.8143	19.9322	25.0848	14.5087	18.6064	33.4525	25.2837	31.2411	16.5093	18.0423	19.4746	37.8143	44.8646	55.9351
1284	9.03532	15.7205	6.54876	16.6749	7.59635	7.25412	7.82941	12.7616	9.9467	9.79027	13.6996	22.6456	28.5803	28.6155	11.792	21.4091	28.7026	35.3033	38.5067	28.2372	20.1343	15.2646	21.0609	22.8186	7.70399	35.8112	19.9373	25.091	14.5117	18.6214	33.4622	25.2844	31.2635	16.5079	18.0463	19.468	37.8343	44.8703	55.9458
1285	9.03649	15.7309	6.55019	16.6812	7.59373	7.25065	7.82831	12.7553	9.9448	9.78533	13.6975	22.6419	28.5827	28.6182	11.7938	21.4267	28.7096	35.3188	38.5279	28.2476	20.144	15.2746	21.0767	22.8296	7.70637	35.8098	19.9431	25.0972	14.5155	18.6365	33.4722	25.2848	31.2844	16.5063	18.0517	19.4615	37.8534	44.8754	55.956
1286	9.0384	15.741	6.55129	16.6874	7.59091	7.24702	7.82818	12.7491	9.94296	9.78006	13.6958	22.6387	28.5859	28.6206	11.7956	21.4444	28.7161	35.3347	38.5486	28.2577	20.1541	15.2844	21.0926	22.8398	7.70851	35.8089	19.9494	25.103	14.5199	18.6517	33.4821	25.2853	31.3047	16.5049	18.0587	19.4546	37.8733	44.882	55.9679
1287	9.04021	15.7506	6.5526	16.6932	7.58842	7.24349	7.82704	12.7426	9.94066	9.77501	13.6936	22.6346	28.5879	28.6235	11.7975	21.4612	28.7231	35.3516	38.5695	28.2673	20.1634	15.294	21.1079	22.8504	7.71111	35.8083	19.9552	25.1091	14.5238	18.6665	33.4915	25.2854	31.3249	16.5037	18.0659	19.4475	37.8926	44.8897	55.9791
1288	9.0416	15.7595	6.554	16.699	7.58603	7.2404	7.82582	12.736	9.93849	9.77055	13.6914	22.6302	28.5881	28.6265	11.7997	21.4772	28.7307	35.3697	38.5906	28.275	20.1723	15.3038	21.1227	22.8607	7.71431	35.809	19.9607	25.1157	14.5279	18.6814	33.5009	25.2851	31.3443	16.5024	18.0737	19.4405	37.9134	44.8974	55.9944
1289	9.04372	15.7682	6.55548	16.7045	7.58359	7.23698	7.82425	12.7293	9.93606	9.76552	13.6892	22.6257	28.5891	28.6298	11.8016	21.4931	28.738	35.3873	38.6112	28.2842	20.1809	15.313	21.1369	22.8711	7.71703	35.8092	19.9667	25.1214	14.532	18.6959	33.5093	25.2851	31.3637	16.5018	18.0823	19.4332	37.9356	44.9062	56.0116
1290	9.04553	15.7768	6.55711	16.7098	7.58132	7.2332	7.82188	12.7223	9.933	9.76009	13.6868	22.6207	28.5901	28.6333	11.8034	21.5085	28.7452	35.4048	38.6317	28.2941	20.189	15.3217	21.1505	22.8818	7.71973	35.8096	19.9727	25.1268	14.5357	18.71	33.5167	25.285	31.3834	16.5016	18.0916	19.4263	37.9576	44.9149	56.0316
1291	9.04755	15.785	6.55853	16.715	7.57908	7.22964	7.81953	12.7149	9.92985	9.75459	13.6843	22.6156	28.591	28.6375	11.8052	21.5235	28.7526	35.4238	38.6529	28.3039	20.1971	15.3305	21.1643	22.8925	7.72225	35.8094	19.9786	25.1321	14.54	18.724	33.5241	25.2849	31.4028	16.5018	18.1012	19.4195	37.9806	44.9233	56.056
1292	9.05106	15.7924	6.55974	16.7203	7.57671	7.22641	7.81811	12.7077	9.92759	9.74967	13.6816	22.6109	28.5916	28.6415	11.8074	21.538	28.76	35.4423	38.6729	28.3126	20.2053	15.3391	21.1774	22.9025	7.72464	35.808	19.9855	25.1366	14.5444	18.7376	33.5313	25.2856	31.4216	16.5023	18.1113	19.4128	38.0033	44.9331	56.0802
1293	9.05266	15.7998	6.56104	16.7253	7.57436	7.22233	7.81644	12.7006	9.9256	9.7445	13.6788	22.6057	28.5918	28.6449	11.8095	21.5524	28.7676	35.4609	38.6917	28.3214	20.2133	15.3476	21.1907	22.9122	7.72739	35.8074	19.9929	25.1415	14.5488	18.7512	33.5375	25.2864	31.4406	16.5031	18.1215	19.4063	38.0257	44.9434	56.1067
1294	9.05436	15.8066	6.56223	16.7297	7.57219	7.21857	7.8149	12.6934	9.92354	9.73934	13.6761	22.5998	28.5914	28.6485	11.8118	21.5663	28.7751	35.4806	38.7109	28.3282	20.2208	15.3566	21.2041	22.9217	7.73021	35.807	19.9991	25.1469	14.5529	18.7646	33.5437	25.287	31.4592	16.5034	18.1313	19.3995	38.0486	44.9548	56.1334
1295	9.05755	15.813	6.56332	16.7341	7.56986	7.21548	7.8141	12.6864	9.92095	9.73433	13.6732	22.5944	28.5903	28.6515	11.8142	21.5795	28.782	35.5003	38.7299	28.3341	20.2283	15.3657	21.2168	22.931	7.73289	35.8069	20.0053	25.1516	14.557	18.7775	33.5501	25.2876	31.4782	16.5035	18.1409	19.3926	38.0712	44.9683	56.1617
1296	9.06021	15.8195	6.5644	16.7387	7.56719	7.21174	7.81322	12.6794	9.91812	9.72868	13.6705	22.5895	28.5892	28.6543	11.8162	21.5926	28.7892	35.5192	38.7485	28.342	20.2357	15.3745	21.2295	22.9404	7.73619	35.808	20.012	25.1563	14.5612	18.7903	33.5559	25.2876	31.4973	16.5037	18.1496	19.3857	38.0949	44.9811	56.1892
1297	9.06234	15.8259	6.56547	16.743	7.56491	7.2079	7.81131	12.6723	9.91548	9.72297	13.6683	22.5843	28.5881	28.6571	11.8182	21.605	28.7968	35.5379	38.7671	28.3501	20.2423	15.3832	21.2422	22.9497	7.73976	35.8083	20.0181	25.1605	14.5652	18.8028	33.5618	25.2872	31.515	16.504	18.1579	19.3786	38.1197	44.9943	56.2175
1298	9.06553	15.8315	6.56618	16.7472	7.56275	7.20459	7.80975	12.6653	9.91269	9.71728	13.6659	22.5798	28.5869	28.6596	11.8206	21.6166	28.8048	35.5562	38.7854	28.3578	20.2491	15.392	21.2543	22.959	7.74279	35.8079	20.0246	25.1647	14.5693	18.8152	33.567	25.2869	31.5324	16.5043	18.1657	19.3713	38.1445	45.0079	56.2453
1299	9.06894	15.8369	6.56657	16.7512	7.56056	7.20079	7.80853	12.6583	9.91017	9.71154	13.6631	22.5755	28.5862	28.6623	11.8227	21.628	28.8132	35.5734	38.8031	28.3654	20.2558	15.4006	21.2664	22.9679	7.74617	35.8071	20.0312	25.1693	14.5732	18.8273	33.5718	25.2871	31.5498	16.5044	18.173	19.3644	38.1699	45.0206	56.2721
1300	9.07096	15.8421	6.56727	16.7554	7.55827	7.19692	7.80703	12.6512	9.90768	9.70606	13.6602	22.5702	28.5847	28.6644	11.8247	21.6394	28.8209	35.5911	38.8209	28.373	20.2622	15.409	21.2783	22.9769	7.74947	35.8064	20.0379	25.1733	14.5774	18.8394	33.5769	25.2876	31.5672	16.5042	18.18	19.3579	38.1946	45.0321	56.2972
1301	9.07362	15.8469	6.56808	16.7594	7.55579	7.19306	7.80533	12.6441	9.90511	9.70057	13.6571	22.5645	28.5829	28.6659	11.8267	21.6504	28.8279	35.6089	38.8393	28.3795	20.2683	15.4173	21.2898	22.9861	7.75232	35.8053	20.0449	25.1776	14.5817	18.851	33.5819	25.2883	31.5843	16.5037	18.1868	19.351	38.2185	45.043	56.3188
1302	9.0767	15.8519	6.56893	16.7635	7.55375	7.18927	7.8038	12.6371	9.90262	9.69518	13.6539	22.5587	28.5813	28.6678	11.8287	21.6615	28.8358	35.6267	38.8565	28.3872	20.2745	15.4259	21.3014	22.995	7.7554	35.805	20.0515	25.181	14.5861	18.8634	33.5868	25.2888	31.6016	16.5029	18.1934	19.3442	38.2424	45.0531	56.339
1303	9.07957	15.8571	6.56998	16.7679	7.5519	7.18506	7.80228	12.6302	9.90033	9.69005	13.6504	22.5518	28.5791	28.6698	11.8305	21.6726	28.8437	35.6449	38.8724	28.3963	20.2805	15.4345	21.3133	23.0036	7.75873	35.805	20.0581	25.1835	14.591	18.8759	33.592	25.2898	31.6193	16.5018	18.1993	19.3372	38.2665	45.0625	56.3564
1304	9.08234	15.8621	6.57083	16.7719	7.54986	7.18131	7.80088	12.6233	9.89792	9.68488	13.6473	22.5459	28.5775	28.6714	11.8326	21.6834	28.8516	35.6626	38.8893	28.4038	20.2866	15.4431	21.3247	23.0126	7.76226	35.8048	20.0646	25.1867	14.5957	18.8884	33.597	25.29	31.6366	16.5009	18.2052	19.3298	38.2905	45.0708	56.3705
1305	9.08681	15.8672	6.57155	16.7755	7.54833	7.17796	7.79964	12.6166	9.89549	9.67967	13.6447	22.5403	28.5767	28.6732	11.8348	21.694	28.86	35.6798	38.9064	28.4105	20.2926	15.4518	21.3358	23.0214	7.76592	35.804	20.0707	25.1896	14.6002	18.9013	33.6017	25.2896	31.6537	16.5001	18.211	19.3227	38.3148	45.0786	56.3836
1306	9.09011	15.8721	6.5724	16.7791	7.54622	7.17447	7.79787	12.6097	9.89308	9.67455	13.6417	22.5347	28.5756	28.6749	11.837	21.7045	28.8686	35.6976	38.9228	28.4177	20.2987	15.4604	21.3468	23.0304	7.76941	35.8042	20.0772	25.1926	14.6052	18.9138	33.6065	25.2898	31.6708	16.4991	18.2167	19.3157	38.3397	45.0856	56.3948
1307	9.09415	15.8768	6.57309	16.7826	7.54335	7.17114	7.79571	12.6025	9.89053	9.66948	13.6384	22.5297	28.5746	28.676	11.8391	21.7148	28.8769	35.715	38.9398	28.4244	20.3048	15.4689	21.3578	23.0401	7.77293	35.8051	20.0841	25.1961	14.6104	18.9257	33.6114	25.2899	31.6879	16.4984	18.2224	19.3085	38.3635	45.092	56.4043
1308	9.09787	15.8817	6.57422	16.7864	7.54098	7.16763	7.79399	12.5956	9.8882	9.66454	13.6356	22.5247	28.5735	28.6777	11.8416	21.7251	28.8854	35.7331	38.9562	28.4318	20.311	15.4774	21.3685	23.0492	7.77672	35.8057	20.0909	25.1988	14.6158	18.9382	33.6164	25.2903	31.7047	16.4973	18.2279	19.3015	38.3868	45.0971	56.4111
1309	9.1017	15.8865	6.57583	16.7901	7.53879	7.16391	7.79205	12.5889	9.88602	9.65973	13.6324	22.5196	28.5727	28.6797	11.844	21.7353	28.8946	35.7524	38.9714	28.4402	20.3176	15.4858	21.379	23.0579	7.78036	35.8071	20.0977	25.2008	14.6217	18.9509	33.6214	25.2914	31.7215	16.4958	18.2333	19.2939	38.4096	45.1025	56.4178
1310	9.10585	15.8913	6.57715	16.7939	7.53646	7.16044	7.79056	12.5821	9.88372	9.6548	13.6299	22.5147	28.5716	28.6817	11.8467	21.7455	28.9032	35.7711	38.9868	28.4481	20.3239	15.4946	21.3899	23.0669	7.78429	35.8085	20.1045	25.2031	14.6273	18.9636	33.6264	25.2921	31.7378	16.4944	18.2386	19.2863	38.4307	45.1074	56.4233
1311	9.11117	15.8961	6.57866	16.798	7.53413	7.15703	7.7899	12.5753	9.88117	9.64978	13.6281	22.5103	28.5703	28.6842	11.8499	21.7559	28.9109	35.79	39.0026	28.4559	20.3301	15.5036	21.4006	23.0757	7.78865	35.8097	20.111	25.2055	14.6329	18.9766	33.6314	25.2924	31.7537	16.4928	18.2438	19.278	38.4529	45.1121	56.4277
1312	9.11553	15.9011	6.57964	16.802	7.53191	7.15353	7.78855	12.5689	9.87939	9.64503	13.6261	22.5054	28.5689	28.6861	11.8529	21.766	28.9193	35.8086	39.0174	28.4636	20.3363	15.5124	21.4114	23.0846	7.79321	35.8103	20.1177	25.2075	14.6383	18.9895	33.6362	25.293	31.769	16.4914	18.2486	19.2693	38.4752	45.1169	56.431
1313	9.12064	15.9059	6.58067	16.8059	7.52976	7.15038	7.78741	12.5624	9.87771	9.64042	13.6239	22.5004	28.5676	28.6879	11.8561	21.7759	28.928	35.8278	39.0313	28.472	20.3423	15.5217	21.4226	23.0938	7.79738	35.8122	20.1249	25.2098	14.6439	19.0023	33.6416	25.2936	31.7845	16.4898	18.2539	19.2605	38.4979	45.1211	56.4335
1314	9.12521	15.9108	6.58208	16.8104	7.52728	7.14745	7.78623	12.5556	9.87557	9.63591	13.6215	22.4963	28.5659	28.6897	11.8596	21.7863	28.937	35.8463	39.0455	28.4809	20.3482	15.5309	21.4338	23.1022	7.80153	35.8145	20.1318	25.2124	14.6499	19.0154	33.646	25.2941	31.8009	16.4883	18.2591	19.2514	38.5211	45.1247	56.4345
1315	9.1316	15.9158	6.58371	16.8151	7.52519	7.14418	7.78505	12.5491	9.87395	9.63152	13.6184	22.4921	28.5642	28.691	11.8627	21.7963	28.9462	35.864	39.0589	28.4895	20.3542	15.5398	21.445	23.1111	7.8058	35.8159	20.1384	25.2146	14.6566	19.0286	33.6509	25.2955	31.8171	16.4867	18.2635	19.2423	38.5441	45.1283	56.4351
1316	9.13638	15.9211	6.58587	16.8197	7.52337	7.14157	7.7846	12.5428	9.87231	9.62757	13.6155	22.4871	28.5627	28.693	11.8658	21.8061	28.9547	35.8824	39.0718	28.4982	20.3604	15.5492	21.4557	23.1205	7.81038	35.8177	20.145	25.2164	14.6636	19.0422	33.6568	25.2967	31.8341	16.4846	18.2683	19.2337	38.5672	45.1319	56.4346
1317	9.14202	15.9264	6.58828	16.8249	7.52136	7.13915	7.78354	12.537	9.8703	9.62344	13.6133	22.4827	28.5612	28.6953	11.8691	21.8163	28.9637	35.8997	39.0842	28.5067	20.3672	15.5579	21.4658	23.1299	7.81548	35.8195	20.1511	25.2178	14.6706	19.0561	33.6622	25.2976	31.8508	16.4826	18.2733	19.2244	38.5897	45.1352	56.4343
1318	9.1483	15.9317	6.59055	16.8302	7.5196	7.13622	7.78221	12.5312	9.86895	9.61941	13.6114	22.4785	28.5597	28.6972	11.8725	21.8261	28.9723	35.9161	39.0965	28.5158	20.3739	15.5667	21.4761	23.1399	7.82053	35.8199	20.1576	25.219	14.6777	19.0698	33.6682	25.2993	31.8662	16.4807	18.2778	19.215	38.6119	45.1384	56.4339
1319	9.15468	15.9373	6.59285	16.8354	7.51823	7.13356	7.78129	12.5252	9.86775	9.61581	13.6097	22.4744	28.5592	28.6989	11.8759	21.8358	28.9811	35.934	39.1088	28.5257	20.3805	15.5761	21.4865	23.1495	7.82575	35.8213	20.1643	25.2195	14.6848	19.0836	33.6739	25.3008	31.8815	16.4789	18.2826	19.2053	38.6337	45.1414	56.432
1320	9.16074	15.9428	6.59521	16.8407	7.51692	7.13074	7.78067	12.5195	9.8663	9.61202	13.6087	22.4713	28.5586	28.7001	11.88	21.8459	28.9907	35.9517	39.1203	28.5354	20.3871	15.5856	21.4973	23.1586	7.83129	35.8237	20.1706	25.2207	14.6918	19.0973	33.6791	25.3019	31.8966	16.4769	18.287	19.1952	38.6558	45.1437	56.4307
1321	9.16798	15.9483	6.59779	16.8462	7.51546	7.1279	7.78073	12.5137	9.86488	9.60873	13.6071	22.4685	28.558	28.7013	11.8841	21.8559	28.9999	35.9684	39.1316	28.5455	20.3935	15.5957	21.5084	23.1684	7.83702	35.8254	20.1773	25.2229	14.6994	19.1111	33.6854	25.3035	31.9118	16.4751	18.2913	19.1846	38.6781	45.146	56.4291
1322	9.17457	15.9538	6.60061	16.8514	7.51386	7.12567	7.78113	12.5081	9.86326	9.60534	13.6052	22.4651	28.5585	28.7024	11.8878	21.8658	29.0091	35.9856	39.142	28.5557	20.3999	15.6059	21.5191	23.1782	7.84286	35.8278	20.1837	25.2244	14.7075	19.125	33.6915	25.3051	31.9274	16.4732	18.2956	19.174	38.7002	45.1484	56.4265
1323	9.18202	15.9594	6.60372	16.8565	7.5124	7.1234	7.78144	12.5026	9.86207	9.60186	13.6035	22.4619	28.5585	28.7036	11.8918	21.8759	29.0189	36.0032	39.1521	28.5658	20.4064	15.6157	21.5297	23.1882	7.84844	35.8301	20.1902	25.225	14.716	19.1394	33.6975	25.3066	31.943	16.4711	18.2992	19.1633	38.7227	45.15	56.4237
1324	9.18979	15.9646	6.60723	16.8614	7.51074	7.12135	7.78179	12.4972	9.86108	9.59832	13.6015	22.4589	28.5583	28.705	11.8959	21.8862	29.0289	36.0202	39.1614	28.5761	20.413	15.6251	21.5398	23.1988	7.85393	35.8324	20.1969	25.225	14.7248	19.1544	33.7043	25.308	31.959	16.4688	18.3022	19.1521	38.7447	45.1516	56.4204
1325	9.19713	15.9706	6.61086	16.8666	7.50936	7.11931	7.78252	12.4919	9.85998	9.59523	13.6002	22.456	28.5585	28.7065	11.9003	21.8963	29.0386	36.0378	39.1712	28.586	20.4197	15.6349	21.5503	23.2091	7.8597	35.8343	20.2033	25.2255	14.734	19.169	33.7105	25.3096	31.9749	16.4665	18.3057	19.1413	38.766	45.1536	56.4172
1326	9.20511	15.9771	6.61482	16.8719	7.50825	7.11731	7.78383	12.4865	9.85909	9.59232	13.5991	22.4532	28.5589	28.7079	11.9048	21.906	29.0486	36.0564	39.1811	28.5952	20.4265	15.6447	21.561	23.2192	7.86505	35.8352	20.2096	25.2252	14.744	19.1835	33.7161	25.3112	31.9908	16.464	18.3089	19.13	38.7868	45.1556	56.4129
1327	9.2133	15.9832	6.61858	16.8768	7.50718	7.11548	7.78435	12.4815	9.8584	9.5892	13.5982	22.4509	28.5594	28.7095	11.9096	21.9161	29.0588	36.0747	39.1908	28.6053	20.433	15.6546	21.5717	23.2299	7.87109	35.8376	20.2159	25.2255	14.7535	19.1984	33.7221	25.3133	32.0062	16.4617	18.3122	19.1186	38.8069	45.1577	56.4081
1328	9.22255	15.9894	6.62244	16.8819	7.50624	7.11384	7.78445	12.4769	9.85752	9.58593	13.5978	22.4489	28.5602	28.7111	11.9146	21.9262	29.069	36.0926	39.2009	28.6156	20.4393	15.6647	21.5825	23.241	7.87798	35.8404	20.2219	25.2267	14.7635	19.2133	33.7279	25.3159	32.0215	16.4599	18.3161	19.1068	38.8274	45.1595	56.4024
1329	9.23085	15.9955	6.62634	16.8863	7.50507	7.11218	7.78511	12.4722	9.85689	9.58328	13.5971	22.447	28.5613	28.7126	11.9197	21.9363	29.0791	36.1105	39.2097	28.6259	20.4458	15.6747	21.5932	23.2518	7.88434	35.8436	20.2283	25.2274	14.773	19.2283	33.7343	25.318	32.0365	16.4575	18.3195	19.0945	38.8474	45.1616	56.396
1330	9.23936	16.0013	6.62995	16.8901	7.50397	7.11061	7.78554	12.4677	9.85679	9.58091	13.5965	22.4459	28.5626	28.7143	11.925	21.9468	29.0894	36.1278	39.2175	28.6368	20.452	15.6846	21.6043	23.2627	7.89064	35.8483	20.235	25.2276	14.782	19.2438	33.7413	25.3202	32.0504	16.455	18.3223	19.0823	38.8676	45.1629	56.3882
1331	9.24883	16.0074	6.63401	16.894	7.50283	7.10913	7.78615	12.4631	9.85649	9.57852	13.596	22.444	28.5639	28.7155	11.9303	21.9571	29.0995	36.1462	39.2253	28.6473	20.4584	15.6946	21.6151	23.2736	7.89718	35.852	20.2413	25.2281	14.7913	19.2591	33.7479	25.3222	32.0651	16.4523	18.3251	19.0698	38.8885	45.1636	56.3795
1332	9.25819	16.0139	6.63854	16.8978	7.5013	7.10768	7.78763	12.4584	9.85606	9.57694	13.5955	22.4418	28.5657	28.7165	11.9356	21.9671	29.1091	36.1654	39.2324	28.6571	20.4653	15.7046	21.6259	23.284	7.90348	35.8554	20.2475	25.2289	14.8004	19.274	33.755	25.3239	32.0804	16.4492	18.3282	19.0574	38.9087	45.1642	56.37
1333	9.26809	16.0201	6.64284	16.9016	7.50014	7.10641	7.78885	12.4538	9.85589	9.57474	13.5952	22.44	28.5668	28.7175	11.9411	21.977	29.1192	36.184	39.2396	28.6678	20.472	15.7146	21.6366	23.2948	7.91024	35.8586	20.2536	25.2295	14.8099	19.2893	33.7618	25.3258	32.0952	16.4463	18.3309	19.0453	38.9285	45.1647	56.3595
1334	9.27798	16.0262	6.64714	16.9053	7.49923	7.10534	7.79004	12.449	9.85592	9.57227	13.595	22.4378	28.5674	28.7185	11.9466	21.9868	29.1299	36.2028	39.2467	28.6794	20.4787	15.7245	21.6471	23.3058	7.91756	35.8618	20.2595	25.2297	14.8197	19.3045	33.7684	25.328	32.1098	16.4436	18.3334	19.0331	38.9479	45.1648	56.348
1335	9.28787	16.0323	6.65167	16.909	7.49831	7.10416	7.79051	12.4447	9.85601	9.56901	13.5943	22.4359	28.568	28.719	11.9522	21.9964	29.1405	36.2226	39.2536	28.6904	20.4849	15.7346	21.6573	23.317	7.92447	35.8642	20.2654	25.2302	14.8299	19.3207	33.7748	25.3298	32.1254	16.4403	18.3355	19.0207	38.9665	45.1644	56.3354
1336	9.29755	16.0381	6.65601	16.9127	7.49735	7.10322	7.79084	12.4404	9.85591	9.56627	13.594	22.4343	28.5683	28.7204	11.958	22.0059	29.1507	36.241	39.2601	28.7004	20.491	15.745	21.6676	23.3285	7.93152	35.8671	20.2712	25.2307	14.8401	19.3369	33.7816	25.3316	32.1401	16.4372	18.3375	19.0085	38.9857	45.1637	56.3226
1337	9.30798	16.0439	6.66025	16.9163	7.49665	7.10247	7.79128	12.4359	9.85544	9.5644	13.5937	22.4326	28.5692	28.7214	11.964	22.0159	29.1607	36.2582	39.2649	28.711	20.4973	15.755	21.6777	23.3399	7.93877	35.8706	20.277	25.2305	14.8505	19.3532	33.7881	25.3334	32.1534	16.4339	18.3391	18.9963	39.0046	45.1629	56.3086
1338	9.31787	16.0498	6.66466	16.92	7.49577	7.10157	7.79153	12.4317	9.85506	9.56235	13.5931	22.4305	28.5707	28.7218	11.9697	22.0259	29.1712	36.2767	39.2696	28.7209	20.5031	15.765	21.6884	23.3509	7.94549	35.8736	20.283	25.2304	14.8614	19.3696	33.794	25.3351	32.167	16.4301	18.3398	18.9841	39.0239	45.1616	56.2944
1339	9.32766	16.0555	6.66897	16.9234	7.49449	7.10029	7.79181	12.4273	9.85487	9.56073	13.5925	22.4285	28.5723	28.7229	11.9751	22.0352	29.1817	36.294	39.2746	28.7303	20.509	15.7751	21.6987	23.3617	7.95273	35.8767	20.2889	25.2305	14.8716	19.3857	33.8	25.3367	32.1803	16.4264	18.34	18.9717	39.0442	45.1602	56.2808
1340	9.33745	16.0611	6.67331	16.9266	7.4932	7.09853	7.79285	12.4224	9.85474	9.55902	13.5918	22.4272	28.5741	28.7234	11.9808	22.0444	29.1926	36.3099	39.2799	28.7411	20.5153	15.785	21.7087	23.3722	7.96082	35.88	20.2947	25.2302	14.8812	19.4021	33.8059	25.3381	32.1933	16.4222	18.3399	18.9599	39.0636	45.158	56.2655
1341	9.34755	16.0667	6.67756	16.9297	7.49186	7.09678	7.79384	12.4179	9.85471	9.55662	13.5911	22.4254	28.576	28.7233	11.9864	22.0538	29.2037	36.3263	39.2857	28.7527	20.5211	15.7949	21.7188	23.3827	7.9684	35.8836	20.3003	25.2309	14.8913	19.4183	33.8114	25.3398	32.2069	16.4174	18.339	18.9484	39.0826	45.1554	56.2495
1342	9.35851	16.0718	6.68144	16.932	7.49069	7.09513	7.79515	12.4133	9.85455	9.55411	13.5907	22.4234	28.5773	28.7231	11.9919	22.0625	29.2149	36.3418	39.2908	28.7644	20.5266	15.8045	21.7287	23.3936	7.97575	35.8885	20.305	25.2318	14.9016	19.4341	33.8172	25.3413	32.2203	16.4126	18.3377	18.9371	39.1013	45.1523	56.2322
1343	9.36819	16.0767	6.68547	16.9345	7.48949	7.09347	7.7962	12.4086	9.85393	9.55135	13.5901	22.4214	28.5781	28.7222	11.9977	22.0718	29.2266	36.3552	39.2953	28.7758	20.5322	15.8142	21.7388	23.4047	7.9832	35.894	20.3096	25.2316	14.9118	19.45	33.8227	25.343	32.2333	16.4076	18.3348	18.9262	39.1196	45.1485	56.2137
1344	9.37904	16.0813	6.68965	16.9369	7.48801	7.09198	7.7961	12.404	9.85316	9.54839	13.5895	22.4194	28.579	28.7208	12.0033	22.0807	29.2382	36.3682	39.2997	28.7866	20.5377	15.8236	21.7489	23.4159	7.99004	35.8992	20.3144	25.2317	14.9228	19.4654	33.8279	25.3448	32.2457	16.4018	18.3292	18.9156	39.1371	45.1444	56.1938
1345	9.38968	16.0853	6.69338	16.939	7.48662	7.09048	7.7961	12.3994	9.85259	9.54569	13.5889	22.4175	28.5799	28.7191	12.0086	22.0885	29.2498	36.3802	39.3042	28.7967	20.5433	15.8326	21.7587	23.427	7.99703	35.9041	20.3191	25.2319	14.9338	19.4806	33.8329	25.3458	32.258	16.3954	18.3216	18.9045	39.1552	45.1402	56.1734
1346	9.39936	16.0892	6.69683	16.9411	7.48488	7.08891	7.79593	12.3947	9.85185	9.54318	13.588	22.4154	28.5807	28.7171	12.014	22.0963	29.2615	36.3896	39.3091	28.8071	20.5492	15.8417	21.7683	23.4382	8.00435	35.908	20.3239	25.2317	14.9443	19.4961	33.8376	25.3469	32.2708	16.3884	18.3114	18.8933	39.1739	45.1355	56.1515
1347	9.41074	16.0927	6.70043	16.9428	7.48289	7.08713	7.79587	12.3897	9.85096	9.54066	13.5868	22.4134	28.582	28.7147	12.0192	22.104	29.2727	36.3977	39.3137	28.8178	20.5549	15.8508	21.7776	23.4491	8.01127	35.912	20.3286	25.232	14.9547	19.5113	33.8422	25.3476	32.2833	16.3803	18.299	18.8822	39.1928	45.1305	56.1276
1348	9.42138	16.0957	6.70387	16.9443	7.4809	7.08524	7.79592	12.3846	9.85033	9.53808	13.5857	22.4114	28.5829	28.7113	12.0245	22.1113	29.2842	36.4031	39.318	28.8283	20.5603	15.8595	21.7868	23.4599	8.01825	35.9165	20.333	25.2321	14.9651	19.5264	33.8466	25.348	32.2957	16.3716	18.2848	18.8714	39.2121	45.1248	56.1025
1349	9.43223	16.0982	6.70689	16.9457	7.4789	7.0833	7.79647	12.3795	9.85001	9.53587	13.5846	22.4091	28.5835	28.7069	12.0297	22.1188	29.2959	36.4068	39.3217	28.8397	20.5655	15.868	21.7958	23.4707	8.02514	35.9218	20.3369	25.2319	14.9757	19.5415	33.8513	25.3479	32.3083	16.3622	18.2685	18.861	39.2311	45.1173	56.0757
1350	9.44213	16.1007	6.71005	16.9467	7.47663	7.08116	7.79687	12.374	9.84928	9.53278	13.5835	22.4069	28.5844	28.7024	12.0348	22.1254	29.3079	36.4067	39.3258	28.85	20.5707	15.8765	21.8049	23.4815	8.03204	35.9265	20.3412	25.2318	14.9861	19.5562	33.8552	25.3481	32.3209	16.3523	18.2502	18.8512	39.2494	45.1096	56.0478
1351	9.45213	16.103	6.71361	16.9475	7.47415	7.07874	7.79742	12.3679	9.84869	9.52888	13.5828	22.4048	28.5851	28.697	12.0398	22.1316	29.3202	36.4045	39.3299	28.8593	20.5755	15.8846	21.8139	23.4924	8.03889	35.9315	20.3457	25.2317	14.9964	19.5707	33.8586	25.3483	32.3333	16.3409	18.229	18.8415	39.2675	45.1009	56.0184
1352	9.4634	16.1048	6.7165	16.9482	7.4716	7.07642	7.79729	12.3622	9.84768	9.52563	13.5817	22.4027	28.5858	28.6916	12.0448	22.1372	29.3322	36.3979	39.3342	28.8694	20.5806	15.8928	21.8229	23.5032	8.04595	35.9355	20.3499	25.2317	15.0069	19.5849	33.8623	25.3485	32.3456	16.3301	18.2076	18.8319	39.2854	45.0908	55.9871
1353	9.4733	16.1068	6.71898	16.9486	7.46888	7.07417	7.79724	12.3563	9.84609	9.52226	13.5806	22.4006	28.5867	28.6862	12.0496	22.142	29.3441	36.3896	39.339	28.8793	20.5859	15.9013	21.8321	23.5139	8.05317	35.9386	20.3544	25.2319	15.0177	19.599	33.8658	25.3492	32.3583	16.319	18.1826	18.8227	39.3032	45.0799	55.9522
1354	9.4834	16.1076	6.72142	16.9487	7.46611	7.07158	7.79668	12.3503	9.84462	9.51895	13.5794	22.398	28.5878	28.6804	12.0543	22.1466	29.3562	36.3738	39.3432	28.8896	20.5907	15.9095	21.8409	23.5246	8.06012	35.9423	20.3581	25.2317	15.0283	19.6125	33.8689	25.3494	32.3703	16.3077	18.1608	18.8137	39.3211	45.0687	55.9155
1355	9.49521	16.1077	6.72359	16.9489	7.46334	7.06874	7.79488	12.3446	9.84318	9.51628	13.5778	22.3955	28.5894	28.6739	12.059	22.1511	29.3679	36.3573	39.3475	28.9005	20.5956	15.9177	21.8494	23.5352	8.06723	35.9461	20.3613	25.2317	15.0386	19.6258	33.872	25.3496	32.3818	16.2959	18.138	18.8048	39.3385	45.0547	55.8729
1356	9.50553	16.1073	6.72564	16.9486	7.46035	7.06587	7.79397	12.3385	9.84147	9.51295	13.5762	22.3928	28.59	28.6676	12.0633	22.1546	29.3799	36.327	39.3512	28.911	20.6001	15.9255	21.8576	23.5458	8.07387	35.95	20.3641	25.2313	15.0496	19.6384	33.8751	25.3491	32.3934	16.2849	18.1192	18.7961	39.3559	45.0392	55.827
1357	9.51638	16.1063	6.72751	16.9479	7.4572	7.06278	7.7933	12.3322	9.83954	9.50902	13.5748	22.3895	28.5904	28.6614	12.0671	22.1579	29.3921	36.2903	39.3545	28.9215	20.6044	15.9329	21.8655	23.5565	8.08009	35.9542	20.3667	25.2306	15.0609	19.6505	33.878	25.3482	32.4048	16.2742	18.1025	18.788	39.3728	45.0219	55.7763
1358	9.5266	16.1044	6.72939	16.9466	7.4539	7.05967	7.79279	12.3255	9.8377	9.50526	13.573	22.3865	28.5908	28.6544	12.071	22.1598	29.4047	36.2401	39.3575	28.9322	20.6084	15.9403	21.8735	23.567	8.08636	35.959	20.3685	25.2297	15.0723	19.662	33.8803	25.3467	32.4161	16.2636	18.0886	18.7801	39.3897	45.0031	55.722
1359	9.53638	16.102	6.73111	16.9449	7.45071	7.05667	7.79223	12.3189	9.83553	9.50183	13.5709	22.3839	28.5897	28.6471	12.0747	22.1605	29.417	36.1749	39.3603	28.9418	20.6124	15.9474	21.8813	23.5774	8.09287	35.9625	20.3692	25.2293	15.0832	19.6727	33.8828	25.3446	32.4275	16.2535	18.078	18.7729	39.4053	44.9818	55.6617
1360	9.54745	16.098	6.7325	16.9425	7.44733	7.05341	7.79208	12.3121	9.83319	9.4981	13.5691	22.3807	28.5884	28.6393	12.0782	22.1601	29.429	36.0922	39.3626	28.9513	20.6163	15.9548	21.8892	23.5878	8.09969	35.9655	20.3685	25.2275	15.0951	19.6822	33.8848	25.3405	32.439	16.243	18.0715	18.7663	39.4206	44.9598	55.5989
1361	9.55713	16.0924	6.73345	16.9396	7.44368	7.04983	7.79123	12.3055	9.83096	9.49457	13.5672	22.3773	28.5875	28.6309	12.0818	22.1582	29.4407	35.9881	39.3639	28.9609	20.6201	15.9625	21.8975	23.5979	8.10619	35.9684	20.3661	25.2248	15.1066	19.6903	33.8858	25.3348	32.4505	16.2314	18.0693	18.76	39.4349	44.9336	55.5269
1362	9.56734	16.0853	6.73424	16.9364	7.44016	7.04597	7.79013	12.299	9.82879	9.49053	13.5653	22.3736	28.5853	28.6208	12.0846	22.155	29.4515	35.8656	39.3634	28.9698	20.6232	15.9694	21.9055	23.6077	8.11253	35.9695	20.3597	25.2218	15.1174	19.6968	33.8861	25.3252	32.4614	16.2183	18.0708	18.7542	39.4485	44.9045	55.4491
1363	9.57723	16.0761	6.73521	16.9324	7.43672	7.04189	7.78998	12.2923	9.82621	9.48611	13.563	22.3694	28.5829	28.6091	12.0865	22.1502	29.4615	35.7202	39.3612	28.9792	20.6268	15.9762	21.9132	23.6181	8.11912	35.9702	20.3491	25.2168	15.1291	19.701	33.886	25.311	32.4716	16.2038	18.0764	18.7485	39.4612	44.8723	55.3629
1364	9.58638	16.0648	6.73594	16.9273	7.4333	7.03806	7.78821	12.2855	9.82341	9.48155	13.5605	22.3652	28.5804	28.5945	12.0878	22.1435	29.4707	35.5616	39.3571	28.988	20.6299	15.983	21.9207	23.6282	8.12506	35.9707	20.3328	25.2107	15.1407	19.7033	33.8859	25.2918	32.4816	16.1866	18.0844	18.7433	39.4734	44.8365	55.2674
1365	9.59596	16.0514	6.73676	16.9214	7.43	7.03449	7.78565	12.2781	9.82088	9.47675	13.5577	22.3608	28.5768	28.576	12.0881	22.1343	29.4795	35.391	39.3507	28.9953	20.6324	15.9897	21.9274	23.6375	8.13085	35.9694	20.3098	25.2037	15.1511	19.7043	33.8851	25.2659	32.4921	16.1659	18.0944	18.7378	39.4846	44.7988	55.169
1366	9.60521	16.0356	6.73765	16.9142	7.42641	7.03073	7.78376	12.2704	9.81784	9.47205	13.5548	22.356	28.5732	28.5531	12.0874	22.123	29.4885	35.2157	39.3421	29.0029	20.6354	15.9967	21.9337	23.6476	8.13616	35.9677	20.2806	25.1944	15.1616	19.7031	33.884	25.2329	32.5022	16.1415	18.1053	18.7326	39.4946	44.7581	55.062
1367	9.61426	16.0172	6.7381	16.906	7.42256	7.02699	7.78096	12.2634	9.8148	9.46702	13.5521	22.3507	28.57	28.525	12.0857	22.1095	29.496	35.044	39.3293	29.0103	20.6376	16.0035	21.9398	23.6579	8.13988	35.9635	20.2449	25.1836	15.1714	19.7001	33.8831	25.1924	32.5119	16.1125	18.1163	18.7273	39.5042	44.7165	54.9561
1368	9.62234	15.9966	6.73811	16.8972	7.41875	7.02324	7.77855	12.256	9.81178	9.46187	13.5493	22.3451	28.565	28.4911	12.0829	22.0945	29.5026	34.8835	39.3139	29.0178	20.6387	16.0098	21.9457	23.6673	8.14273	35.9569	20.2042	25.172	15.1808	19.696	33.8815	25.1446	32.5217	16.0788	18.1236	18.722	39.5129	44.6724	54.8462
1369	9.63117	15.974	6.73806	16.8876	7.41507	7.01922	7.77719	12.2485	9.80793	9.45653	13.5465	22.3395	28.5596	28.4512	12.0783	22.079	29.5088	34.743	39.2967	29.0262	20.6395	16.0157	21.9515	23.6768	8.14519	35.9511	20.1583	25.1596	15.1909	19.6902	33.8795	25.0892	32.5302	16.0412	18.1276	18.7164	39.5214	44.628	54.7376
1370	9.63904	15.9506	6.73799	16.8771	7.41132	7.01525	7.77561	12.2415	9.80408	9.45062	13.5433	22.3336	28.554	28.4053	12.0723	22.0631	29.5139	34.6271	39.278	29.034	20.6397	16.0213	21.9567	23.6861	8.14706	35.9452	20.1099	25.1475	15.201	19.684	33.8777	25.0299	32.5373	15.9992	18.1206	18.7107	39.5298	44.5821	54.6272
1371	9.64777	15.9267	6.73773	16.8663	7.40736	7.01133	7.77422	12.234	9.80049	9.44446	13.5398	22.3274	28.5463	28.3516	12.0649	22.0472	29.5183	34.5466	39.2584	29.0415	20.6392	16.0271	21.9616	23.6951	8.14846	35.9397	20.0605	25.135	15.2115	19.6782	33.8756	24.966	32.5441	15.9516	18.0965	18.7046	39.5388	44.5362	54.5187
1372	9.6566	15.9034	6.73745	16.855	7.40348	7.00693	7.77246	12.2263	9.79678	9.43815	13.5362	22.321	28.5384	28.2928	12.0567	22.0324	29.523	34.4988	39.2377	29.0485	20.6381	16.0328	21.9665	23.7039	8.14938	35.9369	20.0124	25.1218	15.222	19.6731	33.8731	24.9013	32.5499	15.9007	18.0546	18.6981	39.5489	44.4917	54.4157
1373	9.66521	15.8829	6.73711	16.844	7.39978	7.00268	7.77051	12.2189	9.79306	9.43166	13.5327	22.3137	28.5298	28.2308	12.0485	22.0202	29.5283	34.4893	39.2162	29.0549	20.636	16.0381	21.971	23.7124	8.14924	35.9336	19.9717	25.1097	15.2321	19.6711	33.8702	24.8418	32.555	15.8467	17.9836	18.6913	39.5603	44.4492	54.3175
1374	9.67277	15.8623	6.73672	16.8324	7.39624	6.99839	7.76822	12.2115	9.78933	9.42512	13.5288	22.3054	28.5204	28.1603	12.0393	22.008	29.5336	34.5203	39.194	29.0604	20.6334	16.0432	21.9752	23.721	8.14823	35.9289	19.9313	25.0973	15.2416	19.6695	33.8674	24.7786	32.5593	15.7862	17.8896	18.684	39.5735	44.4111	54.2319
1375	9.68319	15.8473	6.73633	16.822	7.39265	6.99433	7.76625	12.2041	9.78571	9.41812	13.5252	22.2974	28.5099	28.0934	12.0312	22.0012	29.5388	34.5778	39.1699	29.0659	20.6296	16.0481	21.9792	23.7294	8.14668	35.9284	19.9043	25.0861	15.2517	19.6735	33.8627	24.7301	32.5625	15.7278	17.7666	18.6766	39.5874	44.3769	54.156
1376	9.69351	15.8345	6.73573	16.8115	7.38915	6.99048	7.76421	12.1967	9.78219	9.41102	13.5219	22.2893	28.4986	28.0228	12.0229	21.9971	29.5449	34.6781	39.1458	29.0709	20.6248	16.0528	21.9829	23.7373	8.14351	35.9297	19.8842	25.0761	15.2614	19.6801	33.8571	24.6861	32.5652	15.6679	17.6168	18.6685	39.6033	44.3481	54.0937
1377	9.70489	15.828	6.73541	16.8026	7.38573	6.98631	7.7622	12.1895	9.7786	9.40307	13.5183	22.2805	28.4863	27.9573	12.016	21.998	29.5504	34.7903	39.1176	29.0757	20.6192	16.0568	21.9863	23.7453	8.14128	35.9331	19.8762	25.0665	15.2715	19.6931	33.8507	24.6565	32.5663	15.6075	17.4385	18.6597	39.6203	44.3224	54.0392
1378	9.71723	15.8262	6.73514	16.7947	7.38223	6.98218	7.76038	12.1823	9.77541	9.39459	13.5144	22.2713	28.4731	27.8908	12.0097	22.0035	29.5549	34.9366	39.0899	29.0799	20.6129	16.0604	21.9896	23.7535	8.13867	35.9397	19.8798	25.0583	15.2818	19.7112	33.8432	24.6378	32.5658	15.5455	17.2241	18.6503	39.6393	44.3012	53.9959
1379	9.73043	15.8292	6.73509	16.7877	7.37893	6.97781	7.75841	12.1751	9.77149	9.38571	13.5107	22.262	28.4591	27.8327	12.0048	22.0121	29.5605	35.0836	39.0535	29.0845	20.6051	16.0635	21.9925	23.7612	8.13687	35.9481	19.8914	25.0488	15.2923	19.7335	33.8347	24.6311	32.5649	15.486	17.0012	18.6397	39.6602	44.2818	53.9577
1380	9.7433	15.8384	6.73539	16.7821	7.37586	6.97324	7.75633	12.1681	9.76727	9.37606	13.5069	22.2525	28.4441	27.7777	12.0012	22.026	29.5676	35.2562	39.0152	29.0894	20.596	16.0662	21.9948	23.7688	8.13521	35.9583	19.9158	25.0406	15.303	19.7626	33.826	24.6383	32.5629	15.4225	16.7336	18.6282	39.6821	44.2656	53.9257
1381	9.75809	15.8499	6.73559	16.777	7.3727	6.96845	7.75405	12.1603	9.76244	9.36634	13.5031	22.2419	28.4283	27.7305	11.9984	22.0412	29.5726	35.4169	38.9656	29.0938	20.5859	16.0683	21.9972	23.7758	8.13477	35.9699	19.9429	25.0294	15.3137	19.7928	33.8151	24.6523	32.5598	15.368	16.4941	18.6158	39.7049	44.251	53.8968
1382	9.77266	15.8674	6.73585	16.773	7.36966	6.9637	7.75179	12.152	9.75721	9.35627	13.4995	22.2312	28.412	27.693	11.9969	22.0607	29.5777	35.5889	38.9092	29.0983	20.5746	16.0699	21.9998	23.7824	8.13472	35.9846	19.981	25.017	15.3248	19.8282	33.8024	24.6808	32.5563	15.3156	16.2355	18.6025	39.727	44.2366	53.866
1383	9.78766	15.8842	6.73608	16.7691	7.36653	6.9585	7.74934	12.1436	9.7515	9.34606	13.4956	22.2198	28.3942	27.6564	11.9958	22.0798	29.5811	35.7454	38.8414	29.1021	20.5622	16.0709	22.0018	23.7888	8.13591	35.9987	20.0172	25.0024	15.3358	19.863	33.7884	24.71	32.5506	15.272	16.0161	18.5884	39.7498	44.2248	53.8405
1384	9.80319	15.9034	6.73631	16.7658	7.36338	6.95319	7.74649	12.1349	9.74544	9.33555	13.4914	22.2078	28.3758	27.625	11.9953	22.1015	29.5833	35.8955	38.7636	29.105	20.549	16.0712	22.0036	23.7948	8.13801	36.0142	20.0573	24.9854	15.3465	19.9	33.7729	24.747	32.5433	15.2356	15.8148	18.5727	39.7705	44.2102	53.8057
1385	9.81883	15.9232	6.73657	16.7629	7.36029	6.94694	7.74419	12.1256	9.73873	9.3249	13.4874	22.1943	28.3558	27.5973	11.9955	22.1224	29.5837	36.036	38.6769	29.1083	20.5344	16.0708	22.0048	23.8004	8.14152	36.0293	20.0976	24.967	15.3575	19.9367	33.7559	24.7857	32.535	15.2062	15.6407	18.5565	39.7907	44.1963	53.771
1386	9.83457	15.942	6.73674	16.7601	7.35713	6.94026	7.74167	12.1165	9.73132	9.31462	13.4835	22.1812	28.3343	27.5699	11.996	22.1423	29.583	36.167	38.58	29.1119	20.5181	16.0701	22.0058	23.8056	8.14628	36.0423	20.1357	24.9473	15.3695	19.972	33.737	24.8232	32.5254	15.1827	15.4953	18.5376	39.8087	44.1788	53.7249
1387	9.84936	15.9585	6.73643	16.7571	7.35358	6.9336	7.73796	12.1071	9.72342	9.30473	13.4793	22.1675	28.3115	27.5443	11.9968	22.1601	29.5807	36.2838	38.4785	29.1159	20.501	16.0687	22.0064	23.8105	8.15272	36.0557	20.1698	24.9269	15.3809	20.0049	33.7175	24.8588	32.5138	15.1677	15.3899	18.517	39.8259	44.1601	53.6729
1388	9.86436	15.9728	6.73578	16.7538	7.34999	6.92605	7.73394	12.097	9.7153	9.29532	13.4749	22.1524	28.2861	27.5206	11.998	22.1751	29.5762	36.3879	38.373	29.1209	20.4822	16.0669	22.0064	23.8152	8.16065	36.0682	20.2	24.9059	15.3928	20.0346	33.6968	24.8902	32.5007	15.161	15.3239	18.4943	39.8404	44.1376	53.6108
1389	9.87862	15.9849	6.73458	16.7503	7.34682	6.9189	7.73104	12.0875	9.70735	9.28706	13.4702	22.1366	28.2605	27.4993	11.9995	22.1875	29.5706	36.4803	38.2693	29.1259	20.4616	16.0642	22.0066	23.8191	8.16928	36.0798	20.2265	24.8852	15.405	20.0611	33.6756	24.9178	32.4863	15.1625	15.2943	18.469	39.8536	44.1118	53.5391
1390	9.89266	15.9939	6.73278	16.7467	7.34364	6.91273	7.72808	12.0785	9.69973	9.2795	13.4644	22.1195	28.2339	27.4803	12.0016	22.1971	29.5638	36.5593	38.1708	29.1312	20.4397	16.0606	22.0063	23.8223	8.17942	36.0929	20.2482	24.8656	15.4161	20.0842	33.6549	24.9411	32.4702	15.1754	15.312	18.443	39.8638	44.0839	53.4613
1391	9.90734	16.0003	6.73135	16.7432	7.34021	6.90698	7.72488	12.07	9.69268	9.27217	13.4589	22.1016	28.2047	27.4641	12.0047	22.2037	29.556	36.6301	38.0788	29.1368	20.4167	16.0569	22.0051	23.8248	8.19064	36.1047	20.2667	24.8476	15.4272	20.1044	33.6356	24.9597	32.4521	15.1966	15.3619	18.4147	39.8717	44.0528	53.3748
1392	9.9216	16.0043	6.72973	16.7401	7.33678	6.90215	7.7225	12.0628	9.68525	9.26561	13.4537	22.0828	28.175	27.4512	12.0086	22.2067	29.5478	36.6933	37.9988	29.1419	20.3928	16.0525	22.0042	23.8263	8.20329	36.1145	20.2818	24.8328	15.4386	20.1214	33.6192	24.9729	32.4328	15.2243	15.4371	18.3866	39.8766	44.02	53.2831
1393	9.93564	16.0059	6.72795	16.737	7.33351	6.89799	7.71943	12.0561	9.67847	9.25955	13.4478	22.063	28.1438	27.4439	12.0137	22.2072	29.5385	36.7526	37.9289	29.1482	20.3682	16.0472	22.003	23.8273	8.21794	36.1241	20.2938	24.8196	15.45	20.1355	33.6046	24.9808	32.4118	15.2579	15.5365	18.3577	39.8788	43.9857	53.1866
1394	9.94872	16.005	6.72667	16.734	7.33054	6.89444	7.71647	12.05	9.67343	9.254	13.4418	22.0425	28.1112	27.4434	12.02	22.2052	29.5291	36.8107	37.8718	29.155	20.3429	16.0416	22.0009	23.8286	8.23279	36.1322	20.3033	24.8081	15.4615	20.1466	33.5925	24.9841	32.3885	15.2945	15.6459	18.3282	39.8786	43.9478	53.0808
1395	9.96096	16.0024	6.72588	16.7309	7.32788	6.89157	7.71503	12.0445	9.66901	9.24907	13.4354	22.0211	28.0785	27.4495	12.0278	22.2004	29.5194	36.8642	37.8252	29.1616	20.3168	16.0356	21.9984	23.8298	8.24788	36.1391	20.3099	24.7973	15.4735	20.1543	33.5814	24.9838	32.3646	15.3343	15.7649	18.2976	39.8752	43.9073	52.9674
1396	9.97457	15.9982	6.72603	16.7274	7.32552	6.8894	7.714	12.0395	9.66641	9.24409	13.428	21.9987	28.0442	27.4649	12.037	22.1938	29.5089	36.9187	37.7886	29.1694	20.2899	16.0289	21.995	23.8304	8.2636	36.1464	20.3143	24.7856	15.4854	20.1597	33.5703	24.9797	32.3408	15.3774	15.8923	18.2669	39.8708	43.8634	52.8459
1397	9.98702	15.9921	6.72682	16.7239	7.32314	6.88836	7.71302	12.035	9.66542	9.23924	13.4206	21.9757	28.0082	27.4871	12.0469	22.1851	29.4984	36.9723	37.7585	29.1768	20.2624	16.0217	21.9915	23.8309	8.27952	36.1544	20.3174	24.774	15.4969	20.1633	33.5592	24.9729	32.3158	15.422	16.022	18.2357	39.8643	43.816	52.7152
1398	9.99989	15.9848	6.72793	16.7201	7.32032	6.88811	7.71227	12.031	9.66469	9.23446	13.4139	21.9517	27.9706	27.5156	12.0576	22.1737	29.4879	37.0229	37.7316	29.1826	20.2348	16.0146	21.9882	23.8308	8.2961	36.1624	20.319	24.7616	15.5087	20.1643	33.5482	24.964	32.2902	15.467	16.1508	18.2039	39.8563	43.7661	52.5777
1399	10.0124	15.9758	6.72983	16.7158	7.3178	6.88831	7.71144	12.0278	9.66463	9.22921	13.4067	21.9272	27.9317	27.5499	12.0694	22.1605	29.4779	37.0711	37.7054	29.1886	20.2074	16.0077	21.9845	23.8307	8.31305	36.1724	20.3195	24.748	15.5212	20.1637	33.5373	24.9524	32.2649	15.5117	16.2785	18.1731	39.8471	43.7134	52.4342
1400	10.0253	15.9649	6.73239	16.7112	7.31598	6.88923	7.7104	12.0247	9.66546	9.22405	13.3996	21.9032	27.8929	27.5871	12.0816	22.1458	29.4679	37.1151	37.6747	29.1937	20.18	16.0009	21.981	23.831	8.32971	36.1825	20.3194	24.7328	15.5335	20.1608	33.5258	24.9398	32.2384	15.5541	16.3986	18.1428	39.8364	43.6604	52.2903
1401	10.0369	15.9524	6.73555	16.7058	7.31398	6.89026	7.70977	12.0217	9.66718	9.21904	13.3926	21.8788	27.8536	27.6262	12.0944	22.1291	29.4573	37.1553	37.6386	29.1989	20.1531	15.9947	21.9771	23.8317	8.34607	36.1905	20.318	24.7156	15.5459	20.1553	33.5129	24.9262	32.2111	15.5942	16.5123	18.1127	39.8244	43.6053	52.1427
1402	10.05	15.9383	6.73955	16.6998	7.3121	6.89084	7.70977	12.0185	9.66947	9.21378	13.385	21.8539	27.814	27.6639	12.1074	22.111	29.4469	37.1898	37.5928	29.2039	20.1271	15.9888	21.973	23.8329	8.36196	36.1992	20.3163	24.6969	15.5576	20.1477	33.4983	24.9116	32.1846	15.6306	16.6167	18.082	39.812	43.5493	51.9943
1403	10.0618	15.9227	6.74485	16.6932	7.31064	6.89144	7.71036	12.0152	9.67303	9.20822	13.3767	21.8287	27.7738	27.7036	12.1214	22.0916	29.4357	37.2184	37.5404	29.209	20.1018	15.9832	21.9689	23.8348	8.37744	36.2077	20.3138	24.676	15.5681	20.138	33.4817	24.8953	32.1585	15.6646	16.7127	18.0501	39.7986	43.4911	51.8427
1404	10.0747	15.9053	6.74978	16.6859	7.30904	6.89162	7.71091	12.0118	9.67587	9.20288	13.3689	21.8034	27.734	27.7386	12.1341	22.0702	29.4252	37.2437	37.4783	29.2136	20.0768	15.9778	21.9645	23.8364	8.39257	36.2159	20.3112	24.6538	15.5796	20.126	33.465	24.8793	32.132	15.6947	16.8016	18.0158	39.7844	43.4305	51.6862
1405	10.0862	15.8865	6.75529	16.6776	7.30731	6.89128	7.7123	12.0084	9.67915	9.19757	13.3611	21.7771	27.6934	27.7721	12.1472	22.0467	29.4149	37.2621	37.4051	29.2177	20.0527	15.9725	21.9596	23.8382	8.40733	36.2242	20.3084	24.6296	15.5911	20.1117	33.4465	24.8623	32.1056	15.7208	16.8806	17.9795	39.7702	43.3696	51.5301
1406	10.0978	15.8661	6.7605	16.6692	7.30574	6.89102	7.71295	12.0046	9.68182	9.19221	13.3531	21.752	27.6545	27.8021	12.1589	22.0224	29.4052	37.2818	37.3297	29.222	20.029	15.9682	21.9548	23.8403	8.42157	36.2324	20.3049	24.6057	15.6028	20.0955	33.4286	24.8458	32.0798	15.745	16.9562	17.9415	39.7559	43.3083	51.373
1407	10.1087	15.8437	6.76558	16.6601	7.30431	6.89072	7.71303	12.0007	9.68408	9.18673	13.3448	21.7269	27.616	27.8285	12.1697	21.996	29.3955	37.2972	37.2432	29.2263	20.0054	15.9637	21.9498	23.8419	8.43503	36.2403	20.3004	24.5793	15.6154	20.0765	33.41	24.8295	32.0534	15.7659	17.0254	17.9013	39.743	43.2491	51.2216
1408	10.1203	15.8209	6.77092	16.6512	7.30284	6.89008	7.71343	11.9965	9.68608	9.18147	13.3371	21.7029	27.5789	27.854	12.1797	21.9697	29.3868	37.3161	37.1624	29.2304	19.9832	15.9608	21.9446	23.845	8.44863	36.2483	20.2964	24.5556	15.6278	20.0573	33.3924	24.8136	32.0285	15.7854	17.0916	17.8603	39.7302	43.1922	51.0762
1409	10.1326	15.7965	6.7765	16.6422	7.30118	6.88915	7.71393	11.9917	9.6881	9.17611	13.3288	21.6797	27.5422	27.8766	12.1886	21.9423	29.3786	37.3352	37.0765	29.2339	19.962	15.959	21.9392	23.8487	8.46232	36.2566	20.2919	24.5318	15.6401	20.0357	33.3739	24.7974	32.0048	15.803	17.1532	17.8174	39.7181	43.1374	50.9365
1410	10.1438	15.7725	6.78168	16.6333	7.2998	6.88829	7.71428	11.987	9.68944	9.17131	13.3218	21.6574	27.5083	27.8987	12.1972	21.9151	29.3715	37.3562	36.9996	29.2378	19.9416	15.9584	21.9344	23.8532	8.4752	36.2644	20.2881	24.5104	15.6522	20.0148	33.3576	24.7824	31.9811	15.8188	17.2106	17.7731	39.7064	43.0843	50.8007
1411	10.1554	15.7478	6.78707	16.6242	7.29882	6.88734	7.71486	11.9824	9.68999	9.16697	13.3158	21.6358	27.4756	27.9196	12.2049	21.8871	29.365	37.379	36.9241	29.2414	19.922	15.9587	21.9296	23.8586	8.48767	36.2719	20.2849	24.4906	15.6644	19.993	33.3425	24.768	31.958	15.8326	17.264	17.7267	39.6944	43.033	50.6674
1412	10.1667	15.7237	6.79194	16.6156	7.29759	6.8862	7.71519	11.9775	9.69076	9.1627	13.3101	21.6157	27.4459	27.9389	12.2122	21.8601	29.3598	37.4024	36.8579	29.2453	19.9033	15.9605	21.9252	23.8647	8.50009	36.2789	20.282	24.4724	15.6762	19.9721	33.3283	24.7542	31.9356	15.8453	17.3127	17.6772	39.6817	42.981	50.532
1413	10.1785	15.6995	6.79647	16.6071	7.29634	6.88504	7.71548	11.9726	9.6913	9.15866	13.3049	21.5964	27.4183	27.957	12.2192	21.8331	29.3558	37.4271	36.7974	29.2495	19.8854	15.9635	21.9213	23.8717	8.512	36.2858	20.2795	24.4558	15.6873	19.9508	33.3155	24.741	31.9131	15.8566	17.3569	17.6267	39.6685	42.9299	50.3962
1414	10.1904	15.6763	6.8006	16.599	7.29511	6.88384	7.71502	11.9679	9.69176	9.15478	13.3007	21.5782	27.3941	27.9739	12.2255	21.8072	29.3523	37.4524	36.7449	29.2541	19.8684	15.9676	21.9174	23.879	8.52333	36.2919	20.2775	24.4408	15.6988	19.9309	33.3033	24.7287	31.8917	15.866	17.3971	17.5728	39.6549	42.8795	50.2598
1415	10.2024	15.6541	6.80444	16.5914	7.2938	6.88214	7.71478	11.9629	9.69224	9.15136	13.2967	21.5623	27.3722	27.9894	12.2309	21.7827	29.3503	37.4775	36.7013	29.2581	19.8522	15.9732	21.9137	23.8866	8.53541	36.2977	20.2757	24.427	15.7102	19.9129	33.2912	24.7173	31.8721	15.8744	17.4321	17.5206	39.6403	42.8298	50.1233
1416	10.215	15.6329	6.80791	16.5843	7.29231	6.88018	7.71464	11.9578	9.69219	9.14776	13.2932	21.5486	27.3527	28.0049	12.2361	21.7597	29.3491	37.5014	36.6645	29.2625	19.8365	15.9796	21.9101	23.8946	8.54731	36.3054	20.2751	24.4142	15.7223	19.8965	33.2791	24.7063	31.8529	15.882	17.4635	17.4668	39.6254	42.7811	49.9868
1417	10.227	15.6133	6.81095	16.5776	7.29077	6.8781	7.71451	11.9527	9.69177	9.14459	13.2905	21.5369	27.3358	28.0191	12.2408	21.7387	29.3487	37.5233	36.6346	29.2673	19.8212	15.9869	21.9069	23.9024	8.55893	36.3134	20.2754	24.4027	15.7348	19.8828	33.2665	24.6964	31.8348	15.8879	17.4901	17.4159	39.6089	42.7321	49.8494
1418	10.2404	15.5954	6.81399	16.5712	7.28884	6.87593	7.715	11.9472	9.69137	9.14174	13.2881	21.527	27.3207	28.0326	12.2452	21.7194	29.3502	37.5403	36.6112	29.2728	19.8067	15.9952	21.9039	23.9108	8.5708	36.3214	20.276	24.3924	15.747	19.8711	33.2524	24.6877	31.8185	15.8927	17.5126	17.3654	39.5913	42.6847	49.7142
1419	10.2538	15.5789	6.8171	16.5652	7.28673	6.87388	7.71531	11.9414	9.69041	9.13862	13.2865	21.5183	27.3074	28.0452	12.2498	21.7016	29.3521	37.5528	36.5929	29.2788	19.7931	16.0039	21.9011	23.9199	8.58213	36.3299	20.2776	24.3832	15.7592	19.8614	33.2366	24.6792	31.8031	15.8965	17.5319	17.3179	39.5724	42.6346	49.5726
1420	10.2678	15.5642	6.82009	16.5598	7.28475	6.87193	7.71527	11.9357	9.68966	9.136	13.2851	21.5104	27.2956	28.0555	12.2544	21.6862	29.3544	37.5589	36.5781	29.2847	19.7804	16.013	21.8991	23.9293	8.59324	36.3372	20.2794	24.3749	15.7712	19.8547	33.2188	24.6718	31.7897	15.8987	17.5477	17.2702	39.5518	42.5833	49.4279
1421	10.2819	15.5512	6.82284	16.5547	7.28278	6.86994	7.71512	11.9304	9.68923	9.1336	13.2836	21.5033	27.286	28.0649	12.2591	21.6731	29.3581	37.5578	36.5676	29.2907	19.7687	16.0227	21.8976	23.9397	8.60439	36.3431	20.2818	24.367	15.7836	19.8513	33.1986	24.6655	31.7781	15.8995	17.5606	17.2283	39.5299	42.5302	49.2791
1422	10.2969	15.5397	6.82532	16.55	7.28086	6.86775	7.71481	11.9251	9.68833	9.13149	13.2829	21.4972	27.2781	28.072	12.2637	21.662	29.3617	37.5486	36.5597	29.2966	19.7576	16.0323	21.8963	23.9505	8.61565	36.3502	20.2847	24.3591	15.7962	19.8506	33.1744	24.66	31.7672	15.8998	17.5711	17.1877	39.5061	42.4741	49.1227
1423	10.3119	15.5302	6.82745	16.5461	7.27879	6.86541	7.71444	11.9198	9.68754	9.12992	13.2816	21.4919	27.2719	28.0767	12.2681	21.6528	29.3661	37.5297	36.552	29.3034	19.7471	16.0423	21.8955	23.9604	8.62714	36.3577	20.2882	24.3513	15.8091	19.8531	33.1456	24.6556	31.7574	15.8993	17.5798	17.1551	39.4828	42.4195	48.9698
1424	10.3273	15.5222	6.82953	16.5423	7.27681	6.86304	7.71389	11.9147	9.68667	9.12818	13.2802	21.487	27.2668	28.0807	12.2723	21.6455	29.3716	37.5023	36.546	29.3101	19.7374	16.0526	21.895	23.9708	8.63852	36.365	20.2928	24.3434	15.8226	19.8577	33.1115	24.6516	31.7485	15.8984	17.5872	17.1275	39.4574	42.3634	48.8136
1425	10.343	15.5154	6.83197	16.5391	7.275	6.86068	7.71344	11.9092	9.68554	9.12636	13.2795	21.4829	27.2614	28.0825	12.2763	21.6395	29.3768	37.4644	36.5403	29.3167	19.7285	16.0627	21.8947	23.9811	8.65011	36.3727	20.298	24.3349	15.8363	19.8638	33.0709	24.6484	31.741	15.8977	17.5933	17.1072	39.4342	42.3095	48.6628
1426	10.3594	15.5103	6.83438	16.5367	7.27326	6.8586	7.71275	11.9036	9.68467	9.12453	13.2787	21.4796	27.2571	28.0838	12.2805	21.6345	29.3825	37.4186	36.5348	29.3236	19.7202	16.073	21.8949	23.9913	8.66183	36.38	20.3037	24.3268	15.8497	19.8719	33.0258	24.6458	31.735	15.8964	17.5984	17.0937	39.4117	42.2569	48.5145
1427	10.3766	15.5056	6.83661	16.5341	7.27163	6.8567	7.71196	11.8982	9.68392	9.12286	13.2783	21.4763	27.2538	28.0846	12.2848	21.6309	29.3884	37.3658	36.5303	29.3301	19.7124	16.0822	21.8955	24.0023	8.67347	36.3863	20.3096	24.3188	15.8631	19.8813	32.9762	24.6438	31.7297	15.8939	17.6027	17.0861	39.3899	42.2048	48.3685
1428	10.3936	15.5011	6.83867	16.5317	7.26991	6.85497	7.71169	11.8926	9.68331	9.1215	13.2781	21.4729	27.2514	28.084	12.2891	21.6277	29.3944	37.3093	36.5268	29.3376	19.7054	16.0912	21.8964	24.0138	8.6853	36.3932	20.3154	24.3107	15.8765	19.8907	32.9237	24.6431	31.7257	15.8911	17.6066	17.0852	39.369	42.1538	48.2257
1429	10.4103	15.4967	6.84074	16.5295	7.26795	6.85341	7.71156	11.8872	9.68239	9.12026	13.2776	21.4697	27.2513	28.083	12.2937	21.6245	29.4009	37.2529	36.5248	29.3458	19.699	16.1006	21.8977	24.0259	8.69694	36.4002	20.3217	24.3033	15.8903	19.9	32.8686	24.6427	31.7226	15.8881	17.6105	17.09	39.3486	42.1023	48.0822
1430	10.4271	15.4916	6.84286	16.5272	7.26619	6.85151	7.71139	11.8821	9.6811	9.11929	13.2772	21.4667	27.2513	28.0814	12.2983	21.621	29.408	37.201	36.5228	29.3538	19.6933	16.1091	21.8994	24.0381	8.70847	36.4069	20.328	24.2971	15.9043	19.9084	32.8138	24.6427	31.7206	15.8849	17.6147	17.1013	39.3303	42.0535	47.9443
1431	10.4436	15.4849	6.84492	16.5245	7.26464	6.84972	7.71124	11.8771	9.68024	9.11818	13.2769	21.4643	27.252	28.0806	12.3028	21.6157	29.4172	37.1614	36.5222	29.3615	19.6882	16.1177	21.9016	24.0502	8.72038	36.4143	20.3353	24.2925	15.9184	19.9141	32.7631	24.6432	31.7198	15.8824	17.6194	17.1177	39.3115	42.0059	47.8082
1432	10.461	15.4779	6.84712	16.5221	7.26329	6.84793	7.71131	11.8723	9.67944	9.11685	13.2766	21.4623	27.2533	28.0794	12.3073	21.6102	29.4277	37.1228	36.5225	29.3691	19.684	16.1268	21.9044	24.0627	8.73258	36.4216	20.3431	24.2884	15.9331	19.9191	32.7097	24.6439	31.7205	15.8802	17.6241	17.1387	39.2949	41.9616	47.6794
1433	10.4772	15.4678	6.84928	16.5187	7.26189	6.84614	7.71115	11.8675	9.67877	9.11594	13.2765	21.4609	27.2555	28.0798	12.3121	21.6019	29.439	37.1087	36.5242	29.3769	19.6798	16.1355	21.9072	24.075	8.74461	36.4292	20.3517	24.2869	15.9476	19.9198	32.6683	24.6454	31.7214	15.8787	17.6304	17.1634	39.279	41.9202	47.5577
1434	10.4938	15.4566	6.85122	16.5148	7.26073	6.84427	7.7108	11.8628	9.67851	9.11541	13.277	21.46	27.2586	28.0806	12.3167	21.5923	29.4518	37.1047	36.5265	29.3842	19.6759	16.1436	21.9102	24.0868	8.75681	36.4373	20.3611	24.2869	15.9619	19.9192	32.6297	24.6477	31.7231	15.8774	17.6373	17.191	39.2621	41.8805	47.4397
1435	10.5099	15.4418	6.85337	16.51	7.25929	6.84281	7.71054	11.858	9.67802	9.11451	13.2768	21.4596	27.2618	28.0832	12.3218	21.5794	29.4656	37.126	36.5315	29.3923	19.6724	16.1519	21.9137	24.0993	8.76891	36.4458	20.3709	24.2894	15.9761	19.9125	32.6045	24.6501	31.7252	15.8772	17.6458	17.2208	39.2457	41.8422	47.3253
1436	10.5255	15.4247	6.85569	16.5045	7.25766	6.84156	7.71009	11.853	9.6773	9.11362	13.2761	21.46	27.2655	28.0869	12.3272	21.5645	29.4797	37.1685	36.538	29.4007	19.6691	16.1603	21.9173	24.1124	8.78088	36.4547	20.3813	24.2942	15.9903	19.9022	32.5891	24.6532	31.7274	15.8778	17.6556	17.253	39.2274	41.8038	47.2109
1437	10.5409	15.404	6.85785	16.4981	7.25641	6.84007	7.70997	11.8484	9.67684	9.11274	13.2759	21.46	27.2701	28.0915	12.3325	21.5463	29.4961	37.2259	36.5461	29.4097	19.6664	16.1686	21.9213	24.1252	8.79283	36.4642	20.392	24.3008	16.0049	19.8864	32.5821	24.6562	31.7307	15.879	17.6665	17.288	39.2078	41.7657	47.0962
1438	10.5547	15.3801	6.85994	16.4907	7.25525	6.8387	7.70998	11.8439	9.67661	9.11156	13.2757	21.4603	27.2752	28.0978	12.338	21.525	29.5147	37.3075	36.5562	29.4196	19.6644	16.1767	21.9256	24.1382	8.80475	36.4743	20.4032	24.3098	16.0198	19.8653	32.5868	24.6592	31.7351	15.8812	17.679	17.3243	39.1859	41.7272	46.9796
1439	10.5682	15.3536	6.86217	16.4826	7.25403	6.8372	7.71015	11.8393	9.67604	9.1106	13.2756	21.4605	27.2803	28.1043	12.3434	21.5015	29.5336	37.3921	36.5673	29.4292	19.6622	16.1849	21.9302	24.1512	8.81681	36.4843	20.4147	24.3198	16.0342	19.8404	32.5945	24.6627	31.7396	15.8837	17.6918	17.3619	39.1646	41.6912	46.8674
1440	10.5822	15.3232	6.86442	16.4735	7.25287	6.83551	7.71089	11.8349	9.67551	9.10987	13.276	21.4604	27.2864	28.1122	12.3486	21.4745	29.5539	37.4946	36.5801	29.4394	19.6603	16.1933	21.935	24.1642	8.82874	36.4942	20.4266	24.3322	16.0488	19.8097	32.6117	24.6662	31.7451	15.8874	17.7058	17.3995	39.1422	41.6563	46.7558
1441	10.5948	15.2923	6.86675	16.4643	7.25187	6.83396	7.71101	11.8304	9.67492	9.10911	13.2761	21.4611	27.2917	28.1196	12.3541	21.447	29.5746	37.5939	36.5938	29.4487	19.6585	16.2015	21.9401	24.1772	8.84093	36.5047	20.4387	24.3441	16.0633	19.7778	32.6279	24.6703	31.7501	15.8904	17.7197	17.436	39.1235	41.6266	46.6555
1442	10.6078	15.258	6.86937	16.4542	7.25069	6.83252	7.71058	11.8257	9.67403	9.10855	13.2757	21.4622	27.2961	28.1276	12.3595	21.416	29.5958	37.7028	36.6093	29.4574	19.6565	16.2093	21.9459	24.1902	8.85362	36.5157	20.4511	24.3569	16.0771	19.7403	32.6506	24.6746	31.7548	15.8934	17.7342	17.4714	39.1074	41.6005	46.5631
1443	10.6195	15.2254	6.87164	16.4447	7.2499	6.83105	7.71078	11.8212	9.67324	9.10774	13.2755	21.4633	27.3013	28.1352	12.3654	21.387	29.6176	37.8048	36.6243	29.4662	19.655	16.2176	21.9515	24.2036	8.86582	36.5271	20.4637	24.3697	16.0915	19.7053	32.669	24.6793	31.7603	15.8965	17.7484	17.5058	39.0963	41.5794	46.484
1444	10.6314	15.1907	6.8737	16.4346	7.24985	6.82953	7.71121	11.8168	9.67231	9.10675	13.2756	21.4648	27.3068	28.1427	12.3717	21.3563	29.6401	37.9087	36.6398	29.4745	19.6536	16.2259	21.957	24.2171	8.87772	36.5388	20.4769	24.3828	16.1066	19.667	32.6889	24.6844	31.7662	15.8994	17.763	17.539	39.0918	41.5651	46.4213
1445	10.6441	15.1595	6.87577	16.4258	7.24924	6.82802	7.71144	11.8125	9.67166	9.10587	13.2755	21.4662	27.3124	28.1499	12.3781	21.3287	29.663	38.0054	36.6555	29.4833	19.6528	16.2344	21.9629	24.2309	8.88987	36.5512	20.4898	24.3957	16.1212	19.6338	32.7042	24.6898	31.7726	15.9022	17.7771	17.5724	39.0955	41.5577	46.3749
1446	10.6566	15.1292	6.87765	16.4173	7.24839	6.82652	7.7118	11.8082	9.67113	9.10502	13.2753	21.4674	27.3182	28.1572	12.3849	21.302	29.6867	38.0985	36.6715	29.4922	19.6524	16.2433	21.9686	24.245	8.90193	36.5641	20.5029	24.4087	16.1357	19.6018	32.717	24.6955	31.7799	15.9048	17.7911	17.6045	39.1123	41.5614	46.3561
1447	10.6697	15.1017	6.87959	16.4103	7.24778	6.82505	7.71243	11.8041	9.67063	9.10371	13.2751	21.4689	27.3245	28.1636	12.3917	21.2782	29.71	38.1866	36.6877	29.5009	19.6523	16.2521	21.975	24.2592	8.91401	36.5773	20.516	24.4219	16.1501	19.5738	32.7271	24.7015	31.7875	15.9076	17.8047	17.6356	39.1385	41.5741	46.3577
1448	10.6834	15.0782	6.8819	16.4045	7.24699	6.82353	7.7132	11.8	9.67027	9.1028	13.2749	21.4704	27.3308	28.169	12.3985	21.2572	29.7335	38.2691	36.704	29.5102	19.6529	16.2608	21.9817	24.2736	8.92639	36.5919	20.5296	24.4349	16.1642	19.5511	32.7338	24.7078	31.7948	15.9099	17.8177	17.6645	39.1782	41.5977	46.3872
1449	10.6979	15.0582	6.8842	16.4	7.24596	6.822	7.71332	11.7957	9.66993	9.10202	13.2744	21.472	27.3368	28.1746	12.4055	21.24	29.7586	38.3508	36.7209	29.5196	19.6543	16.2695	21.9886	24.2885	8.9389	36.608	20.5434	24.448	16.1783	19.5337	32.739	24.7141	31.8028	15.9117	17.8305	17.6917	39.2317	41.6333	46.4454
1450	10.7131	15.0429	6.88652	16.3976	7.2453	6.82042	7.71347	11.7916	9.66905	9.1009	13.2744	21.4737	27.343	28.1798	12.4128	21.2276	29.7841	38.4296	36.737	29.5291	19.6562	16.2783	21.9961	24.3037	8.95135	36.6247	20.5575	24.4613	16.1922	19.5234	32.7428	24.721	31.8115	15.9136	17.8429	17.7168	39.2928	41.6748	46.5207
1451	10.7289	15.0316	6.88901	16.3965	7.24461	6.81872	7.71408	11.7872	9.66836	9.09996	13.2746	21.4753	27.3489	28.1847	12.4202	21.2186	29.8107	38.5066	36.7532	29.5388	19.6587	16.2876	22.0038	24.3191	8.96382	36.6418	20.5719	24.4749	16.2066	19.5194	32.7457	24.7286	31.8201	15.9156	17.8546	17.7393	39.3671	41.7271	46.6243
1452	10.7462	15.0242	6.89134	16.3969	7.24371	6.81727	7.7142	11.7828	9.66774	9.09889	13.2742	21.4767	27.354	28.1898	12.4278	21.2141	29.8384	38.5846	36.7699	29.5487	19.6621	16.2974	22.0119	24.3351	8.97629	36.6592	20.5864	24.489	16.2214	19.522	32.7485	24.7366	31.8288	15.9172	17.8665	17.7614	39.4453	41.7822	46.7351
1453	10.7634	15.0209	6.89374	16.3989	7.24311	6.81579	7.71391	11.7786	9.66723	9.09777	13.274	21.4779	27.3594	28.1944	12.4356	21.2135	29.8659	38.6597	36.7863	29.559	19.666	16.3071	22.0205	24.3515	8.98904	36.6771	20.601	24.5034	16.2362	19.5306	32.7515	24.745	31.8381	15.9189	17.8782	17.782	39.5353	41.847	46.8709
1454	10.7826	15.0212	6.8964	16.4019	7.24248	6.81433	7.71428	11.7742	9.6668	9.09682	13.2741	21.4791	27.3648	28.199	12.4435	21.2158	29.8944	38.7342	36.8032	29.5694	19.6706	16.317	22.0294	24.3684	9.00212	36.696	20.6161	24.5185	16.2512	19.5448	32.7554	24.7537	31.8474	15.9211	17.8898	17.8019	39.6236	41.9104	47.0028
1455	10.8012	15.0244	6.89884	16.4059	7.2417	6.8131	7.71465	11.7698	9.66598	9.09537	13.274	21.4801	27.3696	28.2037	12.4514	21.2211	29.9235	38.8083	36.8199	29.58	19.6759	16.3268	22.0385	24.3857	9.01499	36.7158	20.6315	24.534	16.2659	19.5636	32.7592	24.763	31.8571	15.923	17.9011	17.8211	39.7209	41.9811	47.1531
1456	10.8211	15.0302	6.90121	16.4109	7.24112	6.81159	7.71436	11.7655	9.66544	9.09378	13.274	21.481	27.3749	28.2081	12.4592	21.229	29.9535	38.8802	36.8364	29.5903	19.6818	16.3363	22.0478	24.4032	9.02792	36.736	20.6472	24.5489	16.2808	19.5863	32.7641	24.7731	31.8675	15.9249	17.912	17.8389	39.8104	42.0458	47.2873
1457	10.8407	15.0375	6.90362	16.4166	7.2403	6.81002	7.71454	11.7611	9.66459	9.09237	13.2743	21.4821	27.3802	28.2125	12.4673	21.2388	29.9842	38.9507	36.853	29.6001	19.6885	16.3459	22.0576	24.4211	9.04095	36.7563	20.6627	24.5641	16.2957	19.6126	32.7697	24.7837	31.8782	15.9268	17.9224	17.8554	39.9016	42.1118	47.424
1458	10.8602	15.0457	6.9059	16.4228	7.23929	6.80853	7.71495	11.7566	9.6635	9.09085	13.2741	21.4832	27.3849	28.2164	12.4753	21.2502	30.015	39.0188	36.8694	29.6105	19.6961	16.3558	22.0675	24.4387	9.05377	36.7776	20.6786	24.5794	16.3108	19.6412	32.7751	24.7945	31.8896	15.9281	17.9328	17.8706	39.984	42.1709	47.5445
1459	10.8802	15.0547	6.90826	16.4293	7.23843	6.80697	7.71477	11.7521	9.66282	9.08918	13.2737	21.4844	27.3898	28.2203	12.4832	21.2629	30.0471	39.0841	36.8867	29.621	19.7047	16.3657	22.0776	24.4565	9.06694	36.7992	20.6957	24.5948	16.3262	19.6718	32.7815	24.8056	31.9017	15.9292	17.9429	17.884	40.0609	42.2258	47.655
1460	10.9012	15.064	6.91071	16.436	7.23764	6.80533	7.71452	11.7478	9.66175	9.08734	13.2734	21.4854	27.3947	28.2248	12.4914	21.2759	30.0795	39.1463	36.9046	29.6311	19.7141	16.3754	22.0874	24.475	9.08007	36.8207	20.7127	24.6108	16.3415	19.7037	32.7882	24.8174	31.9144	15.9306	17.9527	17.8971	40.1334	42.277	47.7549
1461	10.9224	15.0735	6.91319	16.4428	7.23676	6.80362	7.71436	11.7434	9.66052	9.08567	13.2734	21.4868	27.4002	28.2291	12.4994	21.2888	30.1121	39.2051	36.9223	29.6418	19.7242	16.3855	22.0974	24.4936	9.09305	36.8428	20.73	24.627	16.3561	19.7361	32.795	24.8298	31.927	15.9317	17.9626	17.9089	40.1996	42.3235	47.8442
1462	10.9424	15.0834	6.91552	16.4499	7.23586	6.80183	7.71402	11.7389	9.65977	9.08367	13.2735	21.4887	27.4064	28.2333	12.5076	21.3021	30.1455	39.2607	36.9406	29.6517	19.7348	16.3957	22.1076	24.5127	9.10615	36.8646	20.7482	24.6435	16.3709	19.7687	32.8031	24.8427	31.9394	15.9329	17.972	17.9207	40.263	42.3669	47.924
1463	10.9627	15.0935	6.91769	16.4573	7.23501	6.79981	7.71352	11.7347	9.65902	9.08162	13.2735	21.4903	27.4129	28.2376	12.516	21.3155	30.1787	39.3122	36.9594	29.6609	19.746	16.4057	22.1179	24.5324	9.11923	36.8859	20.766	24.6605	16.3859	19.8019	32.8124	24.8558	31.9524	15.9342	17.981	17.9316	40.322	42.4066	47.992
1464	10.9837	15.1038	6.91984	16.4647	7.2339	6.79774	7.71301	11.73	9.65793	9.08021	13.2735	21.492	27.4196	28.2418	12.5242	21.3291	30.2124	39.3604	36.9786	29.6697	19.7576	16.4161	22.1288	24.5521	9.13227	36.9077	20.7841	24.6772	16.4007	19.835	32.8222	24.8695	31.9655	15.9348	17.99	17.9432	40.3779	42.4429	48.0526
1465	11.0041	15.114	6.92184	16.4725	7.23271	6.79579	7.71223	11.7251	9.65707	9.07853	13.2736	21.4941	27.4265	28.2462	12.5323	21.3433	30.2472	39.4068	36.9992	29.678	19.7699	16.427	22.1398	24.5717	9.14552	36.9299	20.8028	24.6941	16.416	19.8685	32.8331	24.8836	31.9798	15.9356	17.9989	17.954	40.429	42.4742	48.1007
1466	11.0253	15.1239	6.92387	16.4801	7.23166	6.79373	7.71163	11.7203	9.65617	9.07682	13.2736	21.4964	27.4338	28.251	12.5404	21.357	30.2823	39.4512	37.0213	29.6874	19.783	16.4378	22.1507	24.5917	9.15868	36.9517	20.8219	24.7114	16.4308	19.9016	32.845	24.8985	31.9948	15.9363	18.008	17.9662	40.4781	42.5041	48.145
1467	11.0466	15.1336	6.92597	16.4875	7.23075	6.7916	7.71094	11.7152	9.65516	9.07517	13.2732	21.4986	27.4411	28.2564	12.5484	21.3703	30.3177	39.4925	37.0446	29.6973	19.7968	16.4485	22.1616	24.6117	9.17156	36.9734	20.8415	24.7285	16.4452	19.9347	32.8575	24.9141	32.0106	15.9368	18.0171	17.9789	40.5234	42.5308	48.1812
1468	11.067	15.1431	6.92795	16.4951	7.22964	6.78938	7.71043	11.7104	9.65383	9.07353	13.2732	21.5012	27.4494	28.2614	12.5565	21.3839	30.354	39.5336	37.0694	29.7069	19.8112	16.4596	22.173	24.6326	9.18471	36.9949	20.8618	24.7466	16.4599	19.9673	32.8714	24.9303	32.0267	15.9372	18.0265	17.9924	40.5673	42.5555	48.2126
1469	11.0881	15.1523	6.92983	16.5029	7.22859	6.78713	7.71031	11.7061	9.6526	9.07182	13.2735	21.5043	27.4588	28.2663	12.5647	21.3975	30.391	39.5737	37.0961	29.717	19.8263	16.4708	22.1847	24.654	9.19825	37.0162	20.8829	24.7655	16.4746	19.9993	32.8868	24.9473	32.0437	15.9374	18.036	18.0077	40.61	42.5795	48.2421
1470	11.1086	15.1616	6.93169	16.5104	7.22733	6.78483	7.70947	11.7012	9.65112	9.07009	13.2736	21.5076	27.468	28.2714	12.5729	21.4111	30.4285	39.6116	37.1236	29.7267	19.8418	16.4819	22.1966	24.6755	9.21145	37.0375	20.9039	24.7846	16.489	20.0315	32.9028	24.9643	32.061	15.9376	18.0457	18.0248	40.6526	42.6035	48.2703
1471	11.1295	15.1707	6.93355	16.5179	7.22582	6.78248	7.70825	11.6964	9.64909	9.06845	13.2737	21.5109	27.4775	28.2765	12.5812	21.4247	30.4667	39.648	37.1519	29.736	19.858	16.4935	22.209	24.6979	9.22464	37.0588	20.9254	24.8042	16.5039	20.063	32.9202	24.982	32.0791	15.9373	18.0556	18.0445	40.6957	42.6274	48.2987
1472	11.1499	15.1802	6.93516	16.5251	7.22435	6.78016	7.70725	11.6914	9.64739	9.06675	13.274	21.5146	27.4875	28.282	12.5893	21.4388	30.5053	39.6839	37.1822	29.7453	19.8739	16.5046	22.2211	24.7198	9.23791	37.0798	20.9468	24.8241	16.5182	20.0959	32.9377	24.9997	32.0971	15.9375	18.0655	18.0658	40.7388	42.6513	48.3261
1473	11.1709	15.1897	6.93667	16.5319	7.22291	6.77782	7.70594	11.6858	9.64577	9.06487	13.2743	21.5186	27.4978	28.288	12.5972	21.4526	30.5448	39.7174	37.2144	29.7549	19.8902	16.5152	22.2333	24.7417	9.25099	37.1007	20.9683	24.8444	16.5318	20.1283	32.9566	25.0176	32.1154	15.9379	18.0759	18.0886	40.7818	42.6755	48.3541
1474	11.1916	15.1998	6.93807	16.5384	7.22132	6.77538	7.70486	11.6805	9.6441	9.06315	13.2744	21.5227	27.5085	28.2935	12.6052	21.4678	30.5846	39.752	37.2472	29.7643	19.9064	16.5263	22.2453	24.7637	9.26408	37.1215	20.9904	24.8651	16.5457	20.1635	32.9745	25.0358	32.1337	15.9382	18.0859	18.112	40.8239	42.6994	48.3817
1475	11.2134	15.2096	6.93932	16.5445	7.21978	6.77307	7.70433	11.6753	9.64252	9.06147	13.2744	21.5272	27.5198	28.2986	12.6134	21.4836	30.6249	39.7871	37.2822	29.7737	19.9224	16.5375	22.2571	24.786	9.27735	37.1418	21.0129	24.8864	16.5595	20.1992	32.9931	25.0544	32.1514	15.939	18.0958	18.1358	40.8659	42.723	48.4088
1476	11.2347	15.2211	6.94051	16.5503	7.21784	6.77035	7.70309	11.6699	9.64082	9.05987	13.2743	21.5313	27.531	28.304	12.6214	21.5008	30.6651	39.8212	37.3171	29.7826	19.9384	16.5487	22.269	24.808	9.29045	37.1626	21.0359	24.9075	16.5735	20.2385	33.0102	25.073	32.1705	15.9392	18.1057	18.1593	40.9078	42.7471	48.4364
1477	11.2566	15.2327	6.9416	16.5555	7.21544	6.76723	7.70128	11.6645	9.63905	9.05858	13.2739	21.5356	27.5425	28.3092	12.6295	21.5186	30.7057	39.855	37.3521	29.7911	19.9548	16.5603	22.2806	24.8298	9.30332	37.1832	21.0596	24.9287	16.5875	20.2792	33.0269	25.0914	32.1909	15.9392	18.1152	18.1827	40.9501	42.7719	48.4655
1478	11.2785	15.2468	6.94266	16.5607	7.21327	6.76438	7.69987	11.6591	9.63733	9.05679	13.2736	21.5396	27.5537	28.3144	12.6374	21.5387	30.7459	39.8885	37.3881	29.7996	19.9705	16.5714	22.2927	24.8517	9.31639	37.204	21.0831	24.9502	16.6013	20.3243	33.0423	25.1103	32.2106	15.9391	18.125	18.2069	40.9945	42.7977	48.4962
1479	11.301	15.2626	6.94382	16.5656	7.21097	6.76137	7.6984	11.6537	9.63565	9.0547	13.2733	21.5433	27.5649	28.3198	12.6452	21.5601	30.7859	39.9209	37.425	29.8078	19.986	16.5825	22.3053	24.8736	9.32963	37.2256	21.1069	24.9718	16.6155	20.3725	33.0571	25.1296	32.231	15.9386	18.135	18.2302	41.0398	42.8257	48.5296
1480	11.3244	15.28	6.94448	16.5704	7.20879	6.75839	7.69686	11.6481	9.63368	9.0528	13.2728	21.5469	27.5758	28.3251	12.653	21.5838	30.8263	39.9537	37.4622	29.8159	20.001	16.5934	22.3174	24.8954	9.34266	37.2462	21.1309	24.9937	16.6288	20.4243	33.0703	25.1488	32.2509	15.9383	18.145	18.2536	41.0856	42.8546	48.5649
1481	11.3472	15.2993	6.94479	16.575	7.20677	6.75577	7.69547	11.6425	9.63174	9.05083	13.2722	21.5502	27.5863	28.3303	12.6609	21.6097	30.8667	39.9868	37.5003	29.8247	20.0156	16.604	22.3296	24.9175	9.35576	37.2662	21.1548	25.016	16.6413	20.4803	33.0821	25.1681	32.2702	15.938	18.1552	18.2765	41.1327	42.8851	48.6022
1482	11.3715	15.3201	6.94526	16.5796	7.20468	6.75283	7.69406	11.637	9.62963	9.04864	13.2717	21.5538	27.5969	28.3354	12.6686	21.6373	30.9077	40.0194	37.5388	29.8323	20.0301	16.6144	22.3416	24.9395	9.36869	37.287	21.1791	25.0386	16.6542	20.5392	33.0928	25.1878	32.2898	15.9376	18.1654	18.2981	41.1787	42.9157	48.6394
1483	11.3962	15.3429	6.94552	16.5839	7.2025	6.74955	7.69259	11.6316	9.62705	9.0465	13.2714	21.5571	27.6073	28.3405	12.6762	21.6673	30.9496	40.0514	37.5779	29.8388	20.0444	16.6246	22.3534	24.9612	9.38141	37.3073	21.2038	25.0611	16.6666	20.6019	33.102	25.2077	32.3097	15.9371	18.1758	18.3188	41.225	42.9467	48.6791
1484	11.4214	15.3665	6.94575	16.5883	7.2004	6.7464	7.69101	11.6261	9.62471	9.04425	13.2707	21.5605	27.6181	28.3457	12.6837	21.698	30.9913	40.084	37.6175	29.8456	20.0588	16.6349	22.3652	24.9828	9.39415	37.3286	21.2285	25.0844	16.6796	20.6669	33.1103	25.2275	32.3297	15.937	18.186	18.3387	41.2711	42.9777	48.7187
1485	11.4468	15.3915	6.94611	16.5924	7.19828	6.74328	7.68928	11.6206	9.6224	9.04165	13.2699	21.5643	27.6293	28.3509	12.6911	21.7304	31.0331	40.1166	37.6582	29.852	20.0733	16.6449	22.3771	25.0044	9.40681	37.3511	21.2534	25.1086	16.6933	20.7354	33.1173	25.2473	32.3501	15.9371	18.1959	18.3582	41.3173	43.0093	48.7588
1486	11.4728	15.4176	6.94633	16.5969	7.19647	6.74002	7.68783	11.6152	9.62016	9.03912	13.2692	21.5677	27.6398	28.3559	12.6983	21.7634	31.0751	40.1493	37.6984	29.858	20.0873	16.6552	22.389	25.0258	9.4195	37.3741	21.2785	25.1326	16.7067	20.8052	33.1236	25.2675	32.3695	15.9375	18.206	18.3777	41.3643	43.0413	48.7993
1487	11.4979	15.4445	6.94611	16.6016	7.19473	6.73664	7.68654	11.6096	9.6179	9.03704	13.2679	21.5705	27.6503	28.3611	12.7055	21.7976	31.1171	40.1823	37.7387	29.8644	20.1013	16.6662	22.4007	25.0477	9.43229	37.3957	21.3036	25.1568	16.7199	20.8769	33.1291	25.2874	32.3902	15.9378	18.2163	18.3973	41.4111	43.0732	48.8378
1488	11.5237	15.4719	6.94578	16.6067	7.19266	6.73328	7.68483	11.6041	9.61571	9.03496	13.2671	21.5733	27.6607	28.3665	12.7126	21.8323	31.1593	40.2158	37.7791	29.871	20.1153	16.6767	22.4123	25.0697	9.44484	37.4181	21.3288	25.1816	16.7325	20.9493	33.1336	25.307	32.4107	15.9382	18.2265	18.417	41.4575	43.1043	48.8736
1489	11.5495	15.4998	6.94581	16.6125	7.19067	6.7299	7.683	11.5986	9.61342	9.03271	13.2665	21.576	27.6704	28.3717	12.7196	21.8674	31.2021	40.2491	37.8186	29.8779	20.129	16.6872	22.4242	25.0917	9.45739	37.4404	21.354	25.2065	16.745	21.0222	33.1376	25.3271	32.4305	15.9385	18.2372	18.4366	41.5025	43.1333	48.9063
1490	11.575	15.5283	6.94583	16.6187	7.18877	6.72672	7.68131	11.5931	9.61072	9.03032	13.2656	21.5787	27.6802	28.3773	12.7267	21.9031	31.2451	40.2823	37.8588	29.885	20.143	16.6982	22.436	25.1138	9.47007	37.4628	21.3798	25.2318	16.7579	21.0962	33.1413	25.3474	32.4511	15.9385	18.248	18.4555	41.545	43.1596	48.9333
1491	11.6005	15.5566	6.94579	16.6253	7.18665	6.72394	7.67954	11.5875	9.60788	9.02776	13.2651	21.5814	27.6893	28.3828	12.7337	21.9382	31.2882	40.3162	37.9002	29.8917	20.1572	16.7089	22.4477	25.1361	9.48277	37.4866	21.4062	25.2576	16.771	21.1699	33.1445	25.3679	32.4709	15.9387	18.2583	18.4743	41.5849	43.182	48.9527
1492	11.6262	15.585	6.9459	16.6324	7.18478	6.72115	7.67771	11.5818	9.60529	9.02516	13.2647	21.5843	27.6981	28.3882	12.7406	21.973	31.3319	40.3512	37.9413	29.8985	20.1717	16.7197	22.4595	25.1584	9.49553	37.51	21.4325	25.2832	16.7841	21.2433	33.1477	25.3888	32.4911	15.939	18.2688	18.4926	41.6218	43.2014	48.9668
1493	11.6509	15.6135	6.94574	16.6403	7.18302	6.71819	7.6758	11.576	9.60293	9.02275	13.2641	21.5872	27.707	28.3932	12.7477	22.0078	31.3756	40.3871	37.9826	29.9055	20.1862	16.7313	22.4711	25.1811	9.50836	37.5323	21.4586	25.3087	16.7976	21.3164	33.1517	25.4094	32.5122	15.9395	18.2793	18.511	41.6574	43.2166	48.9726
1494	11.6762	15.6413	6.94543	16.6485	7.18103	6.71512	7.67391	11.5702	9.60068	9.02044	13.2637	21.5901	27.7156	28.3977	12.7545	22.0415	31.4185	40.4229	38.0237	29.9126	20.2005	16.7427	22.4829	25.204	9.52117	37.5543	21.4844	25.3337	16.8108	21.3874	33.1558	25.4299	32.533	15.9402	18.2897	18.5293	41.691	43.2278	48.9712
1495	11.7015	15.6687	6.9455	16.6571	7.17919	6.71171	7.6717	11.5645	9.59828	9.01781	13.2632	21.5933	27.7247	28.4023	12.7614	22.0748	31.462	40.4591	38.0638	29.9199	20.2149	16.7543	22.4953	25.2267	9.53407	37.5769	21.5099	25.3588	16.8237	21.4573	33.16	25.4505	32.5541	15.9405	18.3002	18.5475	41.7226	43.2356	48.9615
1496	11.7262	15.6952	6.94554	16.6662	7.17717	6.70826	7.66964	11.5588	9.5957	9.01501	13.2624	21.5966	27.7338	28.4067	12.7682	22.1067	31.5054	40.4954	38.1033	29.9274	20.2297	16.766	22.5077	25.2492	9.54675	37.5993	21.5354	25.3841	16.8369	21.525	33.1648	25.4707	32.5751	15.9408	18.3104	18.566	41.7525	43.2397	48.944
1497	11.7507	15.7205	6.94559	16.675	7.17507	6.70497	7.66838	11.5531	9.59316	9.01251	13.2616	21.5997	27.7424	28.4107	12.7748	22.1368	31.5482	40.5315	38.1432	29.935	20.2444	16.7776	22.5204	25.272	9.55928	37.6208	21.5613	25.4092	16.8498	21.5896	33.1696	25.4914	32.5959	15.9409	18.3205	18.5833	41.7803	43.2403	48.9187
1498	11.775	15.7444	6.94593	16.6837	7.17313	6.70161	7.66674	11.5474	9.59069	9.01013	13.2607	21.6029	27.751	28.415	12.7814	22.1654	31.5917	40.5675	38.1832	29.9431	20.2594	16.7895	22.5328	25.2953	9.57223	37.6422	21.5875	25.4346	16.8628	21.6514	33.1747	25.5124	32.617	15.941	18.3304	18.6002	41.8057	43.2373	48.884
1499	11.798	15.7662	6.94594	16.692	7.17082	6.69822	7.66508	11.5415	9.58818	9.00762	13.2595	21.6059	27.7595	28.4188	12.7881	22.1918	31.6349	40.6025	38.2222	29.9515	20.2744	16.8014	22.5446	25.3183	9.58501	37.6627	21.6134	25.4596	16.8766	21.7086	33.1805	25.5328	32.6382	15.9415	18.3399	18.616	41.8291	43.231	48.8438
1500	11.8207	15.7858	6.94573	16.6998	7.16854	6.69483	7.66371	11.5356	9.58574	9.00515	13.2584	21.6087	27.7687	28.4223	12.7946	22.2155	31.6779	40.6378	38.2612	29.9599	20.289	16.8137	22.5565	25.3418	9.59756	37.6823	21.6393	25.4845	16.8899	21.7614	33.1865	25.5533	32.6589	15.9419	18.349	18.6305	41.8504	43.2208	48.7964
1501	11.8441	15.8029	6.94563	16.707	7.16652	6.69135	7.66194	11.5299	9.58321	9.00249	13.2573	21.6119	27.7783	28.426	12.8012	22.2362	31.721	40.6729	38.2999	29.9684	20.3039	16.826	22.5687	25.3656	9.61023	37.7017	21.6651	25.5095	16.9028	21.8093	33.1927	25.5738	32.6799	15.9417	18.3575	18.6444	41.8703	43.2078	48.7428
1502	11.8654	15.8173	6.94562	16.7134	7.16434	6.68792	7.66032	11.5241	9.58052	8.99955	13.2565	21.6147	27.7881	28.4292	12.8076	22.2537	31.7635	40.7066	38.3376	29.9756	20.3189	16.8378	22.5807	25.3891	9.6227	37.7211	21.6907	25.5342	16.9162	21.8518	33.1989	25.594	32.7014	15.9411	18.3655	18.6576	41.8884	43.1911	48.6819
1503	11.8864	15.8287	6.94592	16.7188	7.16227	6.68468	7.65846	11.5183	9.57799	8.99694	13.256	21.6171	27.7987	28.4324	12.8138	22.2683	31.8056	40.7397	38.3756	29.9829	20.334	16.8501	22.593	25.4132	9.63523	37.7389	21.7163	25.5593	16.9294	21.8889	33.2049	25.6145	32.7226	15.9404	18.3737	18.67	41.9048	43.1721	48.6151
1504	11.9068	15.8374	6.94621	16.7232	7.16048	6.68151	7.65665	11.5127	9.5755	8.99452	13.2554	21.6201	27.8097	28.4356	12.8198	22.2801	31.8473	40.7715	38.4131	29.9917	20.349	16.8625	22.6057	25.4372	9.64804	37.7558	21.7417	25.5844	16.942	21.9209	33.2109	25.6347	32.7444	15.9396	18.3818	18.6815	41.9197	43.1495	48.5407
1505	11.9265	15.8428	6.9463	16.7264	7.15859	6.67836	7.65501	11.5071	9.57294	8.99195	13.255	21.6227	27.8213	28.438	12.8256	22.2889	31.8881	40.8022	38.4497	30.0004	20.364	16.8745	22.6181	25.4611	9.66095	37.7736	21.767	25.6094	16.9547	21.9472	33.2162	25.6548	32.7658	15.939	18.3892	18.6924	41.9327	43.1253	48.4625
1506	11.9467	15.8455	6.94642	16.7287	7.15675	6.67503	7.65327	11.5016	9.57035	8.98961	13.2545	21.6254	27.8333	28.4405	12.8315	22.295	31.9291	40.8339	38.4861	30.0099	20.3791	16.8869	22.6309	25.4854	9.67392	37.7905	21.7925	25.6344	16.9675	21.9688	33.2205	25.6751	32.7862	15.9384	18.3965	18.7023	41.944	43.0984	48.3781
1507	11.9656	15.8457	6.9464	16.73	7.15515	6.67169	7.65222	11.4962	9.56807	8.98709	13.2537	21.6286	27.8455	28.4435	12.8373	22.2985	31.9694	40.8646	38.5219	30.0197	20.394	16.8989	22.6436	25.5092	9.68652	37.807	21.818	25.6588	16.9801	21.9859	33.2238	25.6947	32.807	15.9377	18.4032	18.7115	41.9528	43.0702	48.2908
1508	11.9839	15.8437	6.94648	16.7305	7.15341	6.66848	7.65076	11.4908	9.56609	8.9845	13.253	21.6315	27.8579	28.4461	12.8432	22.3001	32.0084	40.8941	38.5577	30.028	20.4086	16.9106	22.656	25.5332	9.69911	37.8232	21.8437	25.6829	16.9935	21.9991	33.2261	25.7141	32.8282	15.9369	18.4096	18.7197	41.9597	43.0397	48.1996
1509	12.0016	15.8406	6.94669	16.7304	7.15154	6.66549	7.64932	11.4855	9.56402	8.98219	13.2524	21.6346	27.8704	28.4486	12.849	22.3011	32.0478	40.9236	38.5934	30.0362	20.4232	16.9226	22.6686	25.5573	9.71175	37.8387	21.8696	25.7068	17.007	22.0107	33.2273	25.7334	32.8495	15.9357	18.4164	18.7274	41.9642	43.0083	48.1043
1510	12.0202	15.8353	6.94714	16.7293	7.14942	6.66283	7.64789	11.4803	9.56209	8.98005	13.252	21.6379	27.8832	28.4513	12.8548	22.3003	32.087	40.9521	38.6292	30.0435	20.4378	16.9348	22.6811	25.5816	9.72426	37.8535	21.8958	25.7302	17.021	22.0183	33.2278	25.7524	32.8713	15.9341	18.4236	18.7341	41.9653	42.9746	48.0025
1511	12.0372	15.8299	6.94735	16.7283	7.14772	6.65998	7.64642	11.4751	9.56012	8.97774	13.2515	21.6409	27.8962	28.4537	12.8605	22.2994	32.1257	40.9797	38.6642	30.0514	20.4519	16.9467	22.6937	25.6058	9.73684	37.8681	21.9215	25.7536	17.0346	22.0263	33.2268	25.7711	32.893	15.9328	18.4303	18.7411	41.9662	42.9412	47.901
1512	12.0551	15.8228	6.94753	16.7267	7.14613	6.65713	7.64489	11.4698	9.55803	8.97567	13.251	21.6437	27.9096	28.4552	12.866	22.2971	32.1643	41.0071	38.6991	30.0595	20.466	16.9586	22.7065	25.6303	9.74951	37.8822	21.947	25.7771	17.0483	22.0322	33.2247	25.7893	32.9148	15.9313	18.4371	18.7476	41.9638	42.9058	47.792
1513	12.0721	15.8162	6.94766	16.7252	7.14448	6.65437	7.64326	11.4648	9.55627	8.9734	13.2505	21.6466	27.9224	28.4575	12.8716	22.2955	32.2024	41.0342	38.7331	30.0678	20.4796	16.9704	22.7191	25.6544	9.76226	37.896	21.9727	25.8004	17.0617	22.0389	33.2216	25.8079	32.9362	15.9299	18.4436	18.7543	41.963	42.8726	47.6901
1514	12.089	15.809	6.94762	16.7236	7.14318	6.65152	7.64145	11.4601	9.55478	8.97078	13.2499	21.6495	27.9354	28.4601	12.8772	22.2933	32.24	41.0599	38.766	30.0761	20.4927	16.982	22.7318	25.6783	9.77504	37.9089	21.9979	25.8232	17.075	22.0444	33.2174	25.8266	32.9574	15.9288	18.4496	18.7609	41.9605	42.8386	47.5873
1515	12.1065	15.8021	6.94781	16.7221	7.14149	6.64886	7.63968	11.4552	9.55308	8.96851	13.2496	21.6523	27.9479	28.4624	12.8828	22.2919	32.2773	41.0861	38.7994	30.0848	20.5058	16.9937	22.744	25.7021	9.78798	37.9224	22.0236	25.8465	17.088	22.0514	33.2117	25.8451	32.9788	15.9273	18.456	18.7677	41.961	42.8083	47.4927
1516	12.1245	15.7953	6.94812	16.7204	7.13929	6.64647	7.63788	11.4505	9.55143	8.96632	13.2498	21.6553	27.96	28.4651	12.8887	22.2909	32.3143	41.1128	38.8324	30.094	20.5187	17.0053	22.7559	25.7257	9.80118	37.9364	22.0497	25.8702	17.1005	22.0589	33.2048	25.864	33.0002	15.9258	18.4624	18.7742	41.9625	42.7797	47.4028
1517	12.1418	15.7885	6.94838	16.7193	7.13763	6.64385	7.63612	11.4457	9.54975	8.96415	13.2495	21.658	27.972	28.4671	12.8942	22.2901	32.3511	41.1383	38.8654	30.1026	20.5313	17.0171	22.7679	25.7493	9.81414	37.9493	22.0754	25.8931	17.1134	22.0664	33.1964	25.8824	33.0212	15.9241	18.4689	18.7812	41.9666	42.7543	47.3195
1518	12.1594	15.782	6.94875	16.7188	7.1362	6.64113	7.63408	11.4408	9.54776	8.96221	13.2493	21.6604	27.9842	28.4684	12.8995	22.2901	32.3876	41.1629	38.8985	30.1113	20.5437	17.0292	22.7797	25.7729	9.82721	37.9619	22.1012	25.9161	17.1263	22.0756	33.1865	25.9001	33.0422	15.9221	18.4757	18.7885	41.973	42.7317	47.2426
1519	12.1763	15.7747	6.9491	16.7179	7.13468	6.63852	7.63258	11.436	9.54616	8.96023	13.249	21.6631	27.9959	28.4703	12.9048	22.2888	32.424	41.1874	38.9314	30.1199	20.5559	17.0409	22.7915	25.7963	9.83998	37.9743	22.1266	25.9388	17.1394	22.0823	33.1753	25.9179	33.0634	15.9204	18.4821	18.796	41.9816	42.7118	47.1706
1520	12.193	15.768	6.9494	16.7177	7.13351	6.63591	7.63144	11.4313	9.54523	8.95834	13.2484	21.6662	28.0074	28.4717	12.9099	22.2882	32.4601	41.2109	38.9642	30.1281	20.5679	17.0527	22.8034	25.8197	9.85242	37.9858	22.1516	25.9604	17.1529	22.0896	33.1627	25.9355	33.0843	15.9186	18.4883	18.804	41.9929	42.6954	47.1076
1521	12.2099	15.759	6.94964	16.7161	7.13198	6.63335	7.63019	11.4264	9.54358	8.95626	13.2478	21.6688	28.0183	28.4737	12.915	22.2851	32.4963	41.2352	38.9963	30.1361	20.5796	17.0643	22.815	25.8428	9.86504	37.9972	22.1768	25.9832	17.166	22.0925	33.1489	25.9531	33.1051	15.917	18.4945	18.8125	42.0064	42.6811	47.0514
1522	12.2267	15.7497	6.95001	16.7142	7.13016	6.63089	7.62959	11.4213	9.54157	8.954	13.2471	21.671	28.0288	28.4766	12.9201	22.2814	32.5325	41.2597	39.0279	30.1441	20.5915	17.0753	22.8265	25.8657	9.87758	38.0083	22.2019	26.0068	17.1791	22.0948	33.1336	25.9708	33.1263	15.916	18.5003	18.8214	42.0227	42.6704	47.0048
1523	12.2422	15.7371	6.95016	16.7112	7.1284	6.62845	7.62817	11.4161	9.53981	8.95195	13.2466	21.6736	28.0392	28.4789	12.9252	22.2746	32.5684	41.2845	39.0595	30.1525	20.6027	17.0867	22.8378	25.8888	9.8902	38.0202	22.227	26.03	17.1921	22.0906	33.1169	25.9884	33.1471	15.9144	18.5064	18.83	42.0403	42.6626	46.9658
1524	12.2576	15.7229	6.94996	16.7074	7.12651	6.62595	7.62589	11.411	9.53745	8.94995	13.2462	21.676	28.0492	28.4812	12.9301	22.2663	32.6043	41.31	39.0901	30.161	20.6132	17.0984	22.849	25.9121	9.9029	38.0323	22.2521	26.0536	17.2051	22.0838	33.0989	26.0061	33.1675	15.9124	18.5127	18.8384	42.0597	42.6578	46.933
1525	12.2719	15.7053	6.9501	16.7026	7.12465	6.62354	7.62429	11.4058	9.53566	8.94783	13.2454	21.6785	28.0589	28.4834	12.9351	22.2543	32.6397	41.3353	39.1213	30.1696	20.6238	17.1098	22.86	25.9351	9.91569	38.0442	22.2773	26.0769	17.218	22.069	33.0797	26.0234	33.1879	15.9107	18.519	18.8468	42.08	42.6555	46.9053
1526	12.2853	15.6853	6.95033	16.6972	7.12276	6.62128	7.62279	11.4002	9.53467	8.94571	13.2447	21.6812	28.0686	28.4855	12.9404	22.2398	32.6745	41.3604	39.1532	30.1788	20.634	17.1215	22.8707	25.9581	9.92852	38.0568	22.3027	26.0995	17.2307	22.0493	33.0589	26.0404	33.2082	15.909	18.5256	18.8546	42.1003	42.6548	46.8799
1527	12.298	15.6616	6.95054	16.6903	7.12095	6.6189	7.62126	11.3951	9.53324	8.94375	13.2439	21.684	28.078	28.4874	12.9454	22.2215	32.7094	41.3863	39.184	30.1874	20.6441	17.1329	22.8814	25.981	9.94125	38.0686	22.3278	26.1226	17.2437	22.0212	33.0377	26.0572	33.2286	15.9075	18.5321	18.8621	42.1233	42.6571	46.8595
1528	12.3099	15.6346	6.95113	16.6822	7.11924	6.6165	7.61997	11.3904	9.5318	8.94178	13.2426	21.6869	28.0869	28.4893	12.9504	22.2001	32.7441	41.4124	39.2145	30.1954	20.6541	17.144	22.892	26.0036	9.95426	38.0799	22.353	26.1459	17.2569	21.9858	33.0151	26.0736	33.2491	15.9065	18.5386	18.8691	42.1459	42.6604	46.8413
1529	12.3206	15.6046	6.9513	16.6732	7.11744	6.61412	7.61871	11.3854	9.53023	8.93982	13.2417	21.6898	28.0959	28.4912	12.9554	22.1752	32.7787	41.439	39.2442	30.2036	20.6637	17.1552	22.9028	26.0262	9.96682	38.0904	22.3781	26.1692	17.2699	21.9436	32.9929	26.0902	33.2692	15.9053	18.5452	18.8758	42.1703	42.6662	46.8289
1530	12.3305	15.5707	6.9511	16.6627	7.11568	6.61172	7.61723	11.3808	9.52813	8.93809	13.241	21.6931	28.1049	28.4924	12.9602	22.1461	32.8134	41.4667	39.2726	30.2118	20.6728	17.1664	22.9137	26.0491	9.97903	38.1003	22.403	26.1926	17.283	21.8931	32.9698	26.1069	33.2893	15.9039	18.5518	18.8823	42.1964	42.6747	46.821
1531	12.3389	15.5347	6.95104	16.6517	7.11384	6.60935	7.61588	11.3758	9.52661	8.93624	13.2402	21.696	28.1137	28.4942	12.9653	22.1147	32.8477	41.4939	39.3016	30.2201	20.682	17.1777	22.9246	26.0719	9.99134	38.1105	22.4279	26.2162	17.2961	21.8376	32.9477	26.1234	33.3091	15.9027	18.5584	18.8886	42.2231	42.6858	46.8186
1532	12.3466	15.4952	6.95064	16.6396	7.11179	6.60687	7.61509	11.3704	9.52566	8.93434	13.2394	21.6984	28.1223	28.4964	12.9706	22.0789	32.8814	41.5215	39.3309	30.2282	20.691	17.1892	22.9354	26.0945	10.0033	38.1195	22.4528	26.2399	17.3088	21.7739	32.9256	26.1401	33.328	15.9017	18.5651	18.8942	42.2522	42.7009	46.8233
1533	12.3541	15.4544	6.95063	16.6273	7.10993	6.60459	7.61386	11.3653	9.52431	8.93228	13.2387	21.7011	28.1308	28.4984	12.9759	22.0425	32.9155	41.5486	39.3595	30.2368	20.6998	17.2005	22.9462	26.1172	10.0155	38.1298	22.4778	26.2634	17.3216	21.7075	32.9048	26.1565	33.3474	15.9007	18.5716	18.8992	42.2835	42.7194	46.8351
1534	12.3598	15.4103	6.951	16.6139	7.10808	6.60239	7.61205	11.3603	9.52299	8.9299	13.238	21.7036	28.1391	28.5007	12.9813	22.0031	32.95	41.5755	39.3877	30.2459	20.7084	17.212	22.957	26.1397	10.0281	38.1417	22.5026	26.287	17.3343	21.6342	32.8846	26.1723	33.3669	15.8999	18.5781	18.9034	42.3184	42.7419	46.8562
1535	12.3657	15.3666	6.95125	16.6009	7.10638	6.60024	7.61065	11.3553	9.52171	8.92792	13.237	21.7064	28.1474	28.5028	12.9867	21.9639	32.9837	41.6019	39.416	30.2548	20.7169	17.2234	22.968	26.1624	10.0405	38.1524	22.5276	26.3104	17.3471	21.5609	32.8661	26.1885	33.3865	15.8989	18.5844	18.9073	42.3587	42.7695	46.887
1536	12.371	15.3209	6.95158	16.5873	7.10493	6.59836	7.60947	11.3505	9.51993	8.92608	13.2361	21.7096	28.1559	28.5048	12.992	21.9227	33.0173	41.6278	39.4438	30.2639	20.7252	17.2343	22.979	26.1851	10.0528	38.1632	22.5528	26.3334	17.3597	21.4831	32.8486	26.2047	33.4065	15.8976	18.5903	18.9111	42.4041	42.8019	46.9298
1537	12.3762	15.2763	6.95189	16.5745	7.10335	6.59634	7.60812	11.3457	9.51858	8.92413	13.2352	21.7126	28.1641	28.5066	12.9973	21.8828	33.0507	41.6538	39.4716	30.2731	20.7335	17.2456	22.9903	26.2078	10.0651	38.1736	22.5778	26.3564	17.3726	21.4075	32.8328	26.2208	33.4261	15.8967	18.5964	18.9151	42.4531	42.8382	46.9809
1538	12.3803	15.2309	6.95204	16.5616	7.1018	6.59428	7.60677	11.3408	9.51785	8.9225	13.2341	21.7153	28.1723	28.5082	13.0026	21.8419	33.0829	41.6797	39.4997	30.2825	20.7418	17.2571	23.0016	26.2309	10.0775	38.1824	22.6028	26.3795	17.386	21.3296	32.8187	26.2371	33.4457	15.8962	18.6027	18.9193	42.5077	42.8793	47.0428
1539	12.3849	15.1875	6.95239	16.5498	7.10028	6.59221	7.60559	11.3361	9.5168	8.92074	13.2331	21.7183	28.1802	28.5099	13.0079	21.8031	33.1161	41.7056	39.5274	30.2917	20.7501	17.2685	23.0132	26.2537	10.0897	38.1928	22.6278	26.4026	17.3991	21.2551	32.8057	26.2534	33.4647	15.8954	18.6086	18.9233	42.5632	42.9225	47.1097
1540	12.3901	15.1448	6.95278	16.5388	7.09865	6.59005	7.60446	11.3314	9.51577	8.91885	13.2327	21.7211	28.1875	28.5115	13.013	21.7652	33.1496	41.7316	39.5545	30.3006	20.7582	17.2799	23.0251	26.2764	10.1021	38.204	22.6527	26.4255	17.412	21.1819	32.794	26.2699	33.4831	15.8946	18.6142	18.9275	42.6219	42.9691	47.1832
1541	12.3949	15.1035	6.95347	16.5286	7.09707	6.58792	7.60311	11.3267	9.51465	8.91672	13.2316	21.724	28.1951	28.5134	13.0183	21.7286	33.1838	41.7572	39.5818	30.3107	20.7663	17.2913	23.0371	26.2992	10.1145	38.2155	22.6776	26.4487	17.4251	21.1108	32.7837	26.2863	33.5017	15.8939	18.62	18.9314	42.6823	43.0168	47.2606
1542	12.4006	15.0645	6.95425	16.5196	7.09611	6.586	7.60204	11.3221	9.51307	8.91466	13.2306	21.7273	28.2034	28.5153	13.0237	21.6942	33.2177	41.7827	39.6092	30.3206	20.7746	17.3025	23.0488	26.3224	10.1265	38.2277	22.7029	26.4718	17.4379	21.0436	32.7748	26.3026	33.5193	15.893	18.6253	18.9351	42.7437	43.0656	47.3417
1543	12.4065	15.0284	6.95523	16.5118	7.09498	6.58406	7.60126	11.3173	9.51159	8.91253	13.2299	21.7304	28.2111	28.5174	13.029	21.6625	33.2516	41.8063	39.6363	30.3301	20.7829	17.3138	23.0606	26.3451	10.1385	38.2403	22.7276	26.4946	17.4508	20.9816	32.7675	26.3188	33.5366	15.8922	18.6307	18.9392	42.8075	43.1167	47.4269
1544	12.4128	14.9952	6.95618	16.5052	7.09373	6.58216	7.60032	11.3123	9.51034	8.91033	13.229	21.7335	28.2201	28.5193	13.0343	21.6334	33.2859	41.8297	39.6631	30.3411	20.7913	17.3256	23.0719	26.3681	10.1512	38.2537	22.7529	26.5178	17.4639	20.9245	32.7616	26.3353	33.5549	15.8913	18.6364	18.9431	42.8708	43.1674	47.5115
1545	12.4195	14.9658	6.95704	16.4999	7.09269	6.58023	7.5995	11.3074	9.50905	8.90819	13.2285	21.7367	28.229	28.521	13.0397	21.6077	33.3192	41.8531	39.6894	30.352	20.7998	17.3372	23.0831	26.3915	10.1635	38.2688	22.778	26.5408	17.4767	20.8736	32.757	26.352	33.5725	15.8903	18.642	18.947	42.9341	43.2188	47.5952
1546	12.4272	14.9402	6.95824	16.4959	7.09127	6.57819	7.59883	11.3027	9.50787	8.90602	13.2283	21.7397	28.2376	28.5229	13.0451	21.5848	33.3521	41.8758	39.7151	30.3627	20.8083	17.3486	23.0953	26.4145	10.1757	38.2849	22.8026	26.5638	17.4897	20.8294	32.7538	26.369	33.59	15.8897	18.6473	18.9507	42.9947	43.2693	47.674
1547	12.4365	14.9181	6.95959	16.4932	7.08987	6.57615	7.59787	11.2981	9.50663	8.90409	13.2281	21.7429	28.2472	28.5246	13.0505	21.5647	33.3858	41.8999	39.7404	30.3739	20.817	17.3601	23.1074	26.4381	10.1882	38.3023	22.8278	26.5872	17.5027	20.7912	32.7522	26.386	33.6076	15.8887	18.6526	18.9539	43.0524	43.317	47.7468
1548	12.4456	14.9	6.96095	16.4918	7.08897	6.57413	7.59656	11.294	9.50528	8.90244	13.2278	21.7465	28.2563	28.5261	13.0563	21.5485	33.4194	41.9238	39.7658	30.3852	20.8262	17.3713	23.1196	26.4619	10.1999	38.3199	22.8524	26.6101	17.5156	20.7607	32.7522	26.4028	33.6246	15.8879	18.6578	18.9566	43.1069	43.3607	47.8117
1549	12.4564	14.8855	6.96259	16.4916	7.08797	6.57216	7.5952	11.2899	9.50424	8.90024	13.2277	21.7502	28.265	28.5281	13.062	21.5354	33.453	41.9471	39.7913	30.3964	20.8361	17.3825	23.1324	26.4857	10.2117	38.3385	22.8772	26.633	17.5287	20.7365	32.7546	26.4195	33.6413	15.8875	18.663	18.9587	43.158	43.401	47.8701
1550	12.4676	14.8745	6.96442	16.4925	7.08684	6.57015	7.59427	11.2859	9.50334	8.89814	13.2273	21.7537	28.2741	28.5302	13.0677	21.526	33.4866	41.9711	39.8164	30.4075	20.8463	17.3939	23.1444	26.5099	10.2238	38.3587	22.9022	26.6557	17.5415	20.7188	32.759	26.4361	33.6577	15.8867	18.6681	18.9607	43.2069	43.4387	47.9216
1551	12.4803	14.8668	6.966	16.4943	7.08596	6.56833	7.59318	11.2819	9.50226	8.89652	13.2265	21.7571	28.2826	28.5318	13.0736	21.5199	33.5203	41.995	39.8406	30.4189	20.8564	17.4051	23.1562	26.5342	10.236	38.3798	22.9266	26.6779	17.5539	20.7074	32.765	26.4529	33.6747	15.8856	18.6731	18.9622	43.2529	43.4728	47.9661
1552	12.4937	14.8622	6.96759	16.497	7.08494	6.56689	7.59162	11.2776	9.50143	8.8945	13.2261	21.7605	28.2906	28.5333	13.0792	21.5163	33.554	42.0193	39.8639	30.4297	20.8666	17.4162	23.1685	26.5584	10.2486	38.4018	22.9511	26.7002	17.5669	20.7013	32.7737	26.4696	33.6922	15.8842	18.678	18.9639	43.2974	43.5048	48.004
1553	12.5078	14.86	6.96946	16.5003	7.08376	6.5654	7.59053	11.2735	9.50036	8.89287	13.2259	21.7638	28.2988	28.5344	13.085	21.5148	33.5869	42.0436	39.8862	30.4398	20.8769	17.4272	23.1805	26.5824	10.2613	38.4233	22.975	26.7222	17.5797	20.6996	32.7844	26.4861	33.7091	15.8829	18.6827	18.9655	43.3401	43.5349	48.0351
1554	12.5213	14.8594	6.97125	16.504	7.08283	6.56368	7.58956	11.2693	9.49905	8.8915	13.2257	21.7672	28.3072	28.5351	13.091	21.5151	33.6201	42.0678	39.9073	30.4503	20.8872	17.4382	23.1925	26.6067	10.2737	38.4441	22.9987	26.7444	17.5924	20.7014	32.7971	26.5024	33.7255	15.8817	18.6878	18.9668	43.3793	43.5609	48.0594
1555	12.5354	14.8605	6.97294	16.5084	7.08191	6.56201	7.58867	11.265	9.49821	8.88981	13.2257	21.7712	28.3154	28.5357	13.0969	21.5165	33.6534	42.0933	39.9282	30.4606	20.8978	17.4494	23.2048	26.6307	10.2862	38.4657	23.0224	26.7669	17.6053	20.7065	32.8125	26.519	33.7415	15.8804	18.6925	18.968	43.4161	43.5831	48.0756
1556	12.5505	14.8627	6.97482	16.5133	7.08077	6.56029	7.58843	11.2609	9.49721	8.88823	13.2255	21.7743	28.3235	28.5364	13.1029	21.5188	33.6853	42.1188	39.9488	30.4702	20.9086	17.4607	23.2166	26.6548	10.2986	38.4871	23.0452	26.7886	17.6177	20.7139	32.8297	26.536	33.7563	15.8793	18.6969	18.9687	43.4497	43.603	48.0869
1557	12.5652	14.866	6.97684	16.5188	7.07972	6.55839	7.58763	11.2566	9.49605	8.88662	13.2252	21.777	28.3318	28.5371	13.1089	21.5222	33.7177	42.146	39.968	30.4804	20.9195	17.4718	23.2287	26.6796	10.3107	38.5096	23.068	26.8106	17.6299	20.7233	32.8488	26.5526	33.7716	15.8782	18.7014	18.9688	43.4788	43.6192	48.0915
1558	12.5797	14.8703	6.97859	16.5251	7.07852	6.55674	7.58626	11.2521	9.49501	8.88519	13.2253	21.78	28.34	28.538	13.1148	21.5259	33.7506	42.1742	39.9862	30.491	20.9302	17.4831	23.2412	26.704	10.3233	38.5327	23.0905	26.8321	17.6424	20.7343	32.8699	26.569	33.7879	15.8766	18.7054	18.969	43.5078	43.6337	48.0912
1559	12.5953	14.8755	6.98041	16.5319	7.07706	6.5553	7.58549	11.2477	9.49401	8.8839	13.2254	21.7829	28.3478	28.5387	13.1206	21.5306	33.7827	42.203	40.0044	30.5011	20.941	17.4945	23.2534	26.7284	10.3358	38.5558	23.113	26.8531	17.6549	20.7472	32.8924	26.585	33.8039	15.8751	18.7095	18.9689	43.5347	43.6455	48.0846
1560	12.6102	14.8816	6.9824	16.5394	7.07575	6.55378	7.58469	11.2433	9.49294	8.88251	13.2254	21.7864	28.3555	28.5398	13.1262	21.5362	33.8156	42.2328	40.0224	30.5117	20.9517	17.5055	23.2661	26.7532	10.3483	38.5801	23.1361	26.8753	17.6678	20.7612	32.9167	26.6006	33.8194	15.8736	18.7138	18.9685	43.5606	43.6564	48.0743
1561	12.6249	14.8887	6.98437	16.5476	7.07461	6.55238	7.58402	11.239	9.49189	8.88112	13.2256	21.7904	28.3634	28.5413	13.1317	21.5424	33.8482	42.2616	40.0396	30.5219	20.9622	17.5169	23.2786	26.7777	10.361	38.6044	23.1588	26.8968	17.6806	20.7771	32.9419	26.6162	33.834	15.872	18.7181	18.968	43.5859	43.6653	48.058
1562	12.6411	14.8973	6.98659	16.5563	7.0735	6.55077	7.58357	11.2352	9.49108	8.87936	13.2254	21.7941	28.3703	28.5426	13.1374	21.5493	33.8807	42.2914	40.0576	30.5318	20.9729	17.5284	23.2908	26.8028	10.3737	38.6294	23.1822	26.9184	17.6933	20.7952	32.968	26.6323	33.8487	15.8706	18.7227	18.9672	43.6087	43.6729	48.0392
1563	12.6565	14.9071	6.98871	16.5656	7.07237	6.54912	7.58284	11.2312	9.49027	8.87735	13.225	21.7977	28.3767	28.5441	13.1432	21.5575	33.9144	42.3216	40.0761	30.5418	20.9837	17.54	23.3039	26.8282	10.3863	38.6556	23.2062	26.9413	17.7063	20.8157	32.9948	26.6488	33.8633	15.8694	18.7274	18.9659	43.6289	43.6792	48.0158
1564	12.6726	14.9184	6.99083	16.5755	7.07113	6.54765	7.58221	11.2273	9.48988	8.87561	13.2248	21.8012	28.384	28.546	13.1488	21.567	33.9486	42.351	40.0944	30.5515	20.995	17.552	23.3167	26.8535	10.3987	38.6805	23.2301	26.9633	17.7194	20.8389	33.022	26.6656	33.8778	15.8687	18.7322	18.9646	43.6488	43.6837	47.9908
1565	12.6893	14.9309	6.99327	16.5859	7.06992	6.54602	7.58163	11.2234	9.48933	8.87406	13.2245	21.8044	28.3907	28.5482	13.1545	21.5776	33.9834	42.3819	40.1137	30.5623	21.0067	17.564	23.3295	26.8798	10.4115	38.7063	23.2553	26.9866	17.7323	20.8649	33.0498	26.683	33.8931	15.8684	18.7375	18.9631	43.6666	43.6856	47.9621
1566	12.7056	14.9443	6.99561	16.5968	7.06878	6.54465	7.58138	11.2193	9.48871	8.87267	13.2245	21.8073	28.3975	28.5512	13.1602	21.589	34.0194	42.4116	40.1347	30.5733	21.0186	17.5756	23.3425	26.9063	10.4243	38.7338	23.2814	27.0112	17.7453	20.8931	33.0768	26.7009	33.9078	15.8685	18.7433	18.9613	43.6847	43.6883	47.9327
1567	12.7229	14.9594	6.99798	16.6085	7.06766	6.54365	7.5815	11.2151	9.48831	8.87168	13.2249	21.81	28.4043	28.5549	13.1656	21.6021	34.0563	42.4406	40.1568	30.5846	21.0309	17.587	23.3557	26.9332	10.4372	38.7621	23.3083	27.0366	17.7585	20.9246	33.1043	26.7193	33.9219	15.869	18.7496	18.9591	43.7026	43.6897	47.8999
1568	12.7406	14.974	7.00041	16.6197	7.06662	6.54248	7.58105	11.2109	9.48764	8.87035	13.2249	21.8127	28.4112	28.5589	13.1714	21.6148	34.0942	42.4704	40.1806	30.596	21.0433	17.5984	23.3692	26.9603	10.4499	38.7911	23.3356	27.0627	17.7712	20.9556	33.1298	26.7381	33.9364	15.8697	18.756	18.957	43.7198	43.6916	47.8683
1569	12.7571	14.9899	7.00295	16.6311	7.06563	6.54122	7.58066	11.2067	9.4866	8.86888	13.2252	21.815	28.4179	28.5634	13.1775	21.6284	34.1333	42.5	40.2062	30.6078	21.0559	17.6096	23.383	26.9881	10.4625	38.8223	23.3639	27.0902	17.7834	20.9894	33.1547	26.7574	33.9511	15.8707	18.7629	18.9546	43.7358	43.6932	47.8343
1570	12.7747	15.0043	7.00521	16.6419	7.06477	6.54012	7.5801	11.2027	9.48576	8.86763	13.2251	21.8177	28.4247	28.5682	13.1835	21.6409	34.1724	42.5298	40.2329	30.6192	21.0686	17.6209	23.3967	27.0154	10.4752	38.8526	23.3923	27.1175	17.796	21.0203	33.1774	26.7765	33.9652	15.872	18.7701	18.9522	43.7531	43.6959	47.804
1571	12.7906	15.0188	7.00735	16.6524	7.06404	6.53913	7.57914	11.1989	9.48481	8.86637	13.2247	21.8209	28.4317	28.5733	13.1896	21.6538	34.2126	42.5607	40.2617	30.6307	21.0816	17.6323	23.4109	27.0426	10.488	38.8829	23.4208	27.1451	17.8088	21.0518	33.1985	26.796	33.9792	15.8736	18.7774	18.9499	43.77	43.6981	47.7733
1572	12.8066	15.0313	7.00965	16.6626	7.0633	6.53815	7.57829	11.1951	9.48423	8.86511	13.2245	21.8237	28.4382	28.5786	13.1957	21.665	34.2525	42.5897	40.2902	30.6417	21.0944	17.6434	23.4246	27.07	10.5006	38.9132	23.4501	27.173	17.8214	21.0795	33.2182	26.8152	33.993	15.8753	18.7851	18.9472	43.788	43.7024	47.7482
1573	12.8227	15.0432	7.01194	16.6727	7.0626	6.53733	7.5774	11.1913	9.48388	8.86407	13.2244	21.8266	28.4445	28.5843	13.202	21.6753	34.2925	42.6179	40.3203	30.6523	21.1075	17.6544	23.4382	27.0972	10.5133	38.9439	23.4804	27.2016	17.834	21.1058	33.2358	26.8343	34.0063	15.8775	18.7935	18.9442	43.8063	43.7071	47.7252
1574	12.838	15.053	7.01413	16.6821	7.06201	6.53628	7.57665	11.1877	9.48345	8.86274	13.2241	21.8294	28.4507	28.5899	13.2082	21.6843	34.3327	42.6459	40.3494	30.6629	21.1199	17.6654	23.4518	27.1247	10.5258	38.9743	23.51	27.2299	17.8464	21.1284	33.253	26.8536	34.0198	15.8794	18.8014	18.9412	43.8267	43.7149	47.7079
1575	12.8516	15.0611	7.01642	16.6908	7.06159	6.53518	7.57573	11.184	9.48333	8.86116	13.224	21.8319	28.4568	28.5954	13.2145	21.692	34.3734	42.6731	40.3785	30.673	21.1322	17.6762	23.4653	27.1525	10.538	39.0044	23.54	27.2581	17.8584	21.1476	33.2689	26.8733	34.0333	15.8814	18.8092	18.938	43.8475	43.7243	47.6945
1576	12.866	15.0682	7.01865	16.6994	7.06085	6.53406	7.5751	11.1803	9.48284	8.85987	13.2237	21.8346	28.463	28.6012	13.2207	21.6989	34.4133	42.7	40.4075	30.6835	21.1441	17.6871	23.4786	27.1799	10.5505	39.0344	23.5694	27.2863	17.8706	21.1653	33.2844	26.8923	34.0466	15.8832	18.8168	18.9348	43.8714	43.7367	47.6871
1577	12.8791	15.0733	7.02055	16.7072	7.06006	6.53274	7.57487	11.1767	9.48203	8.85852	13.2232	21.8374	28.469	28.6073	13.2268	21.7041	34.4531	42.7269	40.4368	30.6942	21.1554	17.6982	23.4919	27.2073	10.5633	39.0647	23.5983	27.3147	17.8828	21.1789	33.2981	26.911	34.0596	15.885	18.8242	18.9315	43.898	43.752	47.6849
1578	12.8924	15.0788	7.02289	16.7157	7.05933	6.53161	7.57452	11.1731	9.48151	8.85751	13.2228	21.8399	28.4748	28.6128	13.233	21.7102	34.4919	42.7527	40.4646	30.7045	21.1669	17.7088	23.5048	27.2344	10.5758	39.0941	23.6274	27.3424	17.8951	21.1944	33.3137	26.9298	34.0726	15.8867	18.8313	18.9282	43.9259	43.7695	47.6879
1579	12.905	15.0824	7.02563	16.7238	7.05832	6.53059	7.57408	11.1694	9.48102	8.85695	13.2224	21.8425	28.4804	28.6183	13.2391	21.7149	34.5297	42.777	40.492	30.7147	21.1785	17.7192	23.5173	27.2612	10.5883	39.1231	23.6565	27.3698	17.9079	21.2068	33.3288	26.9481	34.0855	15.8885	18.8381	18.9251	43.956	43.7897	47.6973
1580	12.9178	15.0892	7.02811	16.7334	7.05759	6.52955	7.57381	11.1659	9.4805	8.85581	13.2223	21.845	28.4864	28.6234	13.2454	21.7225	34.5677	42.802	40.5189	30.7249	21.1901	17.7297	23.5298	27.2883	10.6007	39.1519	23.6854	27.3969	17.9199	21.2248	33.346	26.9667	34.0983	15.8899	18.8447	18.9215	43.9872	43.8116	47.7099
1581	12.9311	15.0954	7.03067	16.7431	7.05723	6.52851	7.57373	11.1626	9.48001	8.85461	13.2224	21.8476	28.4926	28.6281	13.2516	21.7301	34.6052	42.8268	40.5448	30.7348	21.2016	17.7401	23.5418	27.3152	10.6129	39.1806	23.7145	27.4234	17.9315	21.2424	33.3645	26.9854	34.111	15.8911	18.8509	18.9179	44.02	43.8355	47.7274
1582	12.9451	15.1065	7.03311	16.7548	7.05644	6.52747	7.57343	11.1589	9.47962	8.85331	13.2222	21.85	28.4983	28.6329	13.258	21.7415	34.643	42.8512	40.57	30.745	21.2133	17.7507	23.5543	27.3424	10.6252	39.2086	23.7432	27.45	17.9434	21.2688	33.3848	27.0041	34.1238	15.8922	18.857	18.914	44.0537	43.862	47.7485
1583	12.9598	15.1194	7.03527	16.7676	7.05543	6.52651	7.57312	11.1551	9.4794	8.85146	13.2221	21.8525	28.5046	28.6377	13.2646	21.7546	34.6811	42.8751	40.5949	30.7554	21.2248	17.7618	23.5668	27.37	10.6374	39.2357	23.7719	27.4766	17.9549	21.2984	33.4064	27.0228	34.1366	15.893	18.8626	18.9096	44.0886	43.8906	47.7741
1584	12.9755	15.1377	7.03769	16.7824	7.05457	6.52543	7.57294	11.1514	9.47887	8.85025	13.2217	21.8546	28.5097	28.6421	13.2709	21.7721	34.7186	42.8994	40.6187	30.7657	21.237	17.7726	23.5791	27.3971	10.6496	39.2637	23.8003	27.5029	17.9668	21.3381	33.4301	27.0413	34.149	15.8938	18.8683	18.9052	44.1251	43.9217	47.8032
1585	12.9918	15.1595	7.04016	16.7986	7.0535	6.52434	7.5725	11.1476	9.47828	8.84945	13.2209	21.8561	28.5138	28.6463	13.2771	21.7924	34.7557	42.9232	40.6407	30.7759	21.2495	17.7833	23.5916	27.424	10.6616	39.2915	23.8284	27.5288	17.9795	21.3845	33.4563	27.0601	34.1615	15.8944	18.8738	18.9008	44.1627	43.9561	47.837
1586	13.0109	15.1864	7.04283	16.8166	7.05272	6.52319	7.57247	11.1441	9.47769	8.84833	13.2205	21.8582	28.5182	28.6501	13.2833	21.8173	34.7928	42.9474	40.6632	30.7858	21.262	17.794	23.6038	27.4511	10.6738	39.3194	23.8565	27.5546	17.9912	21.4407	33.4833	27.0784	34.1732	15.8951	18.879	18.8963	44.2017	43.9915	47.8729
[truncated: 914 more rows]

## Sheet: TIR emissivity
Wavelength (μm)	CR-01 (n=4)	CR-02 (n=4)	CR-04 (n=2)	CR-05 (n=2)	CR-08 (n=2)	CR-11 (n=4)	CR-13 (n=4)	CR-14 (n=4)	CR-15 (n=4)	CR-16 (n=3)	CR-17 (n=4)	CR-21 (n=1)	CR-22 (n=2)	CR-24 (n=3)	CR-29 (n=4)	CR-31 (n=4)	CR-35 (n=4)	CR-36 (n=4)	CR-38 (n=4)	CR-42 (n=3)
[truncated: 606 more rows]
